# Supplementary material for: The m6A reader IGF2BP3 promotes acute myeloid leukemia progression by enhancing RCC2 stability
Source: PubMed Central journal article supplement (PMC8894383; doi:10.1038/s12276-022-00735-x), 2022-02-25
Supplement: 12276_2022_735_MOESM1_ESM.pdf [file 12276_2022_735_MOESM1_ESM.pdf]

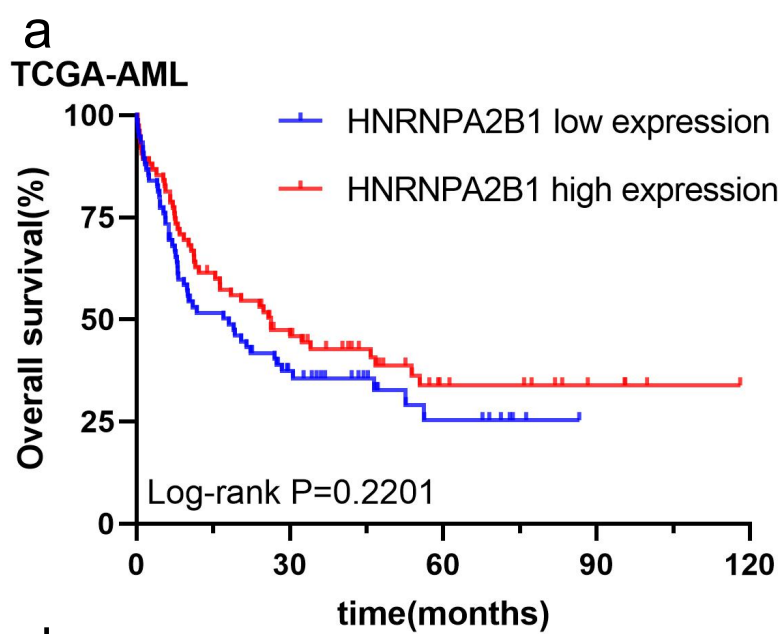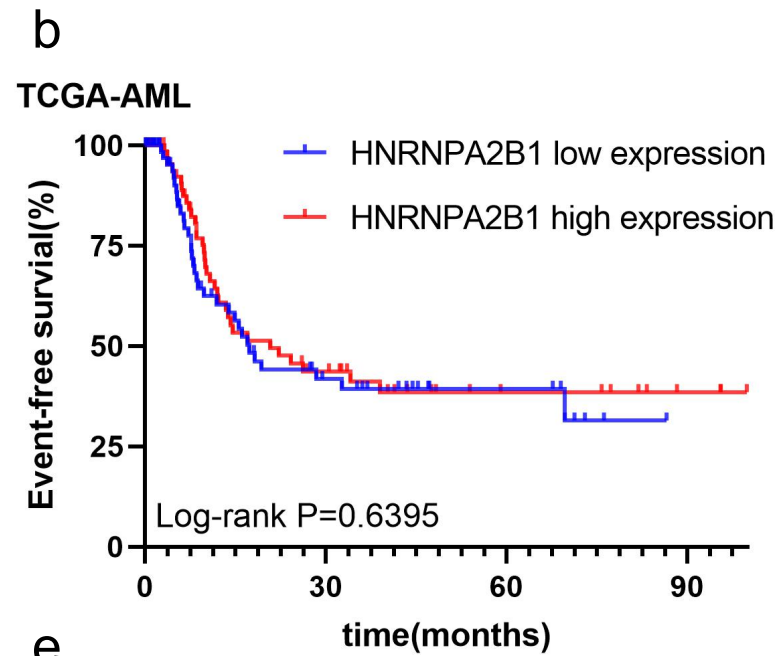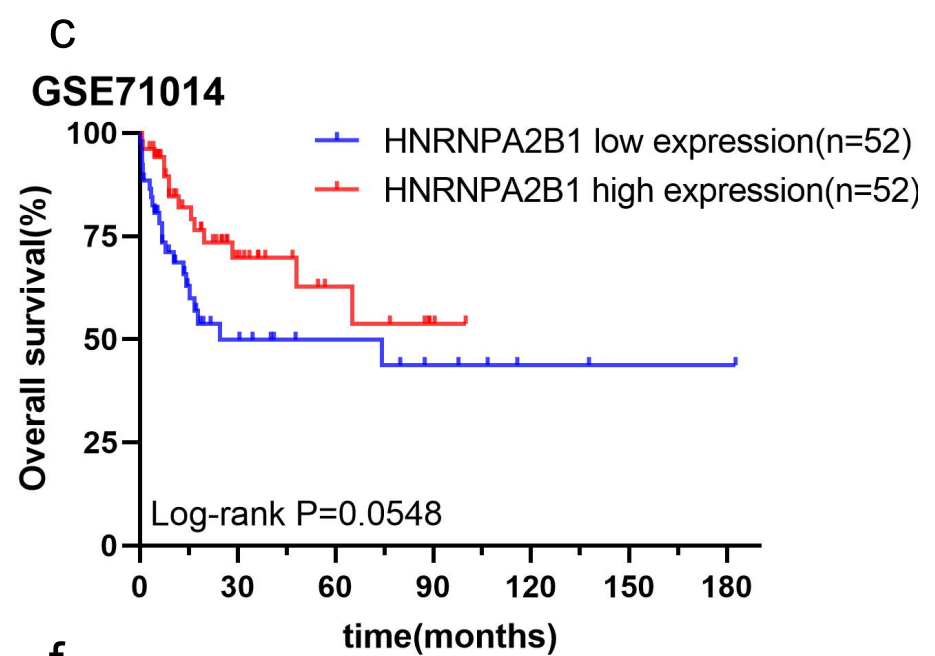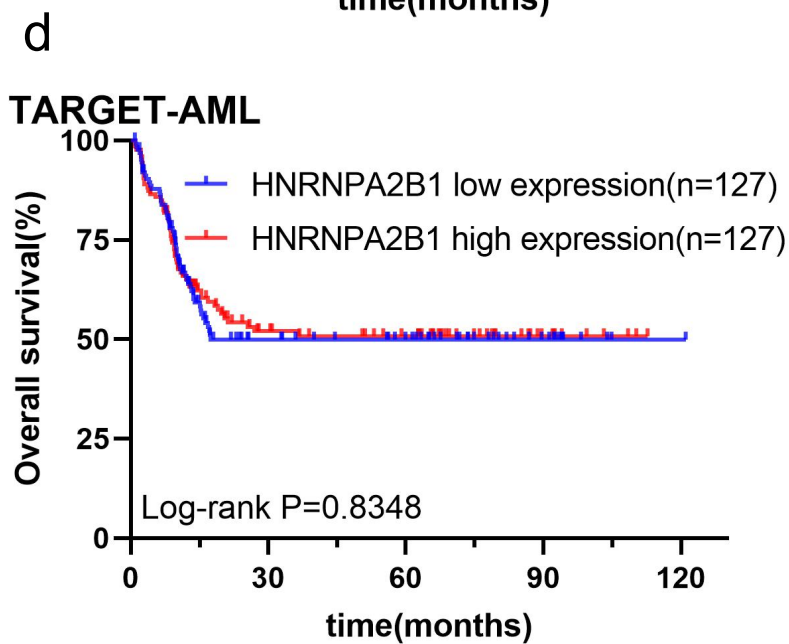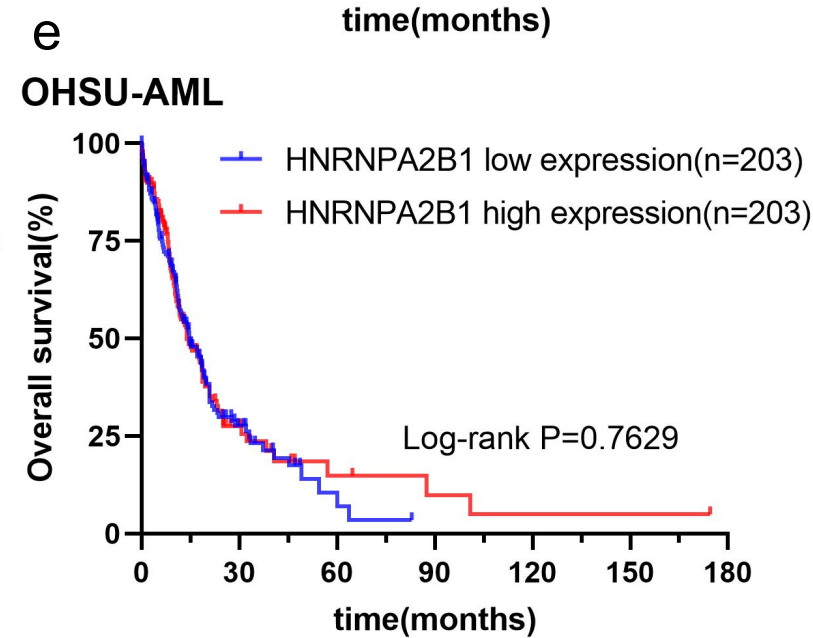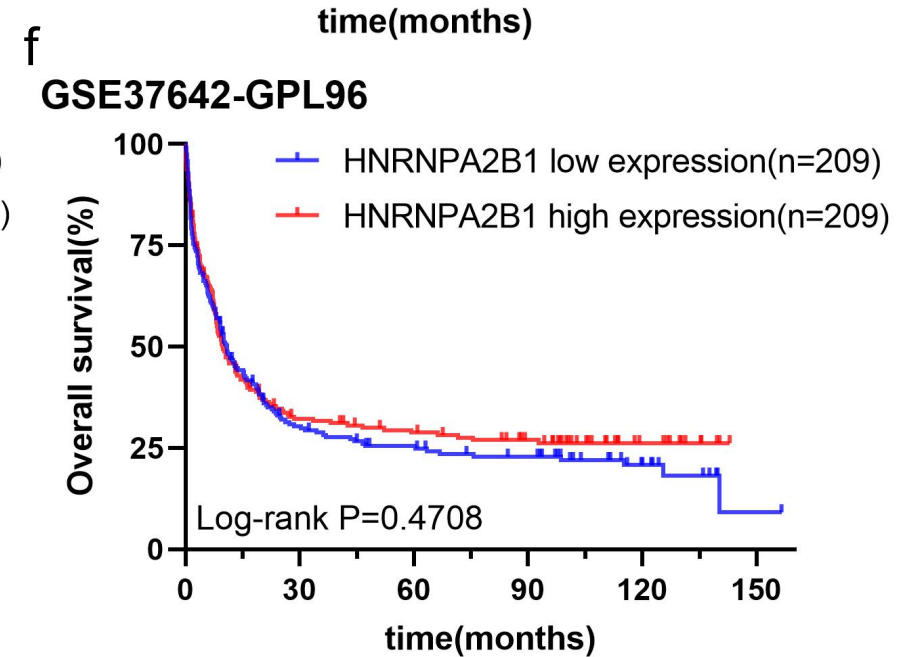

**Supplementary Fig. 1.** Kaplan-Meier survival analysis across multiple datasets showed that HNRNPA2B1 was not associated with prognosis in patients with AML. (a-b) TCGA database. (c) GSE71014 database. (d) TARGET database. (e) OHSU database. (f) GSE37642 database.

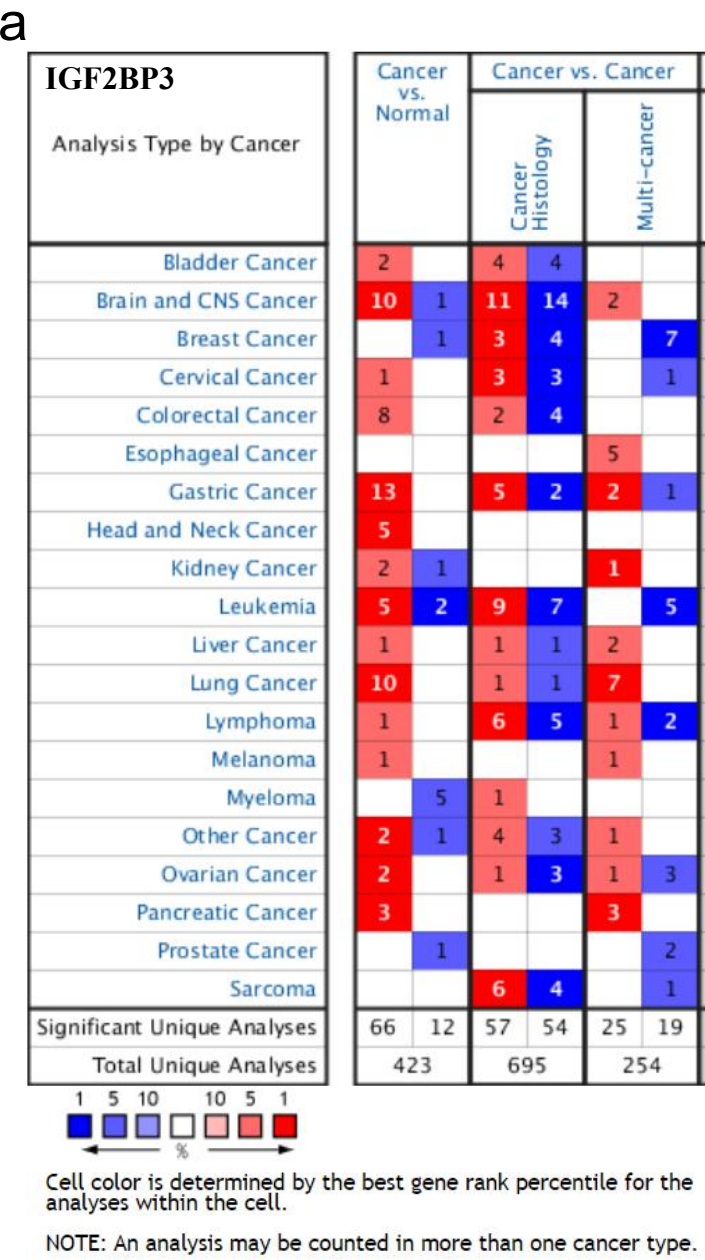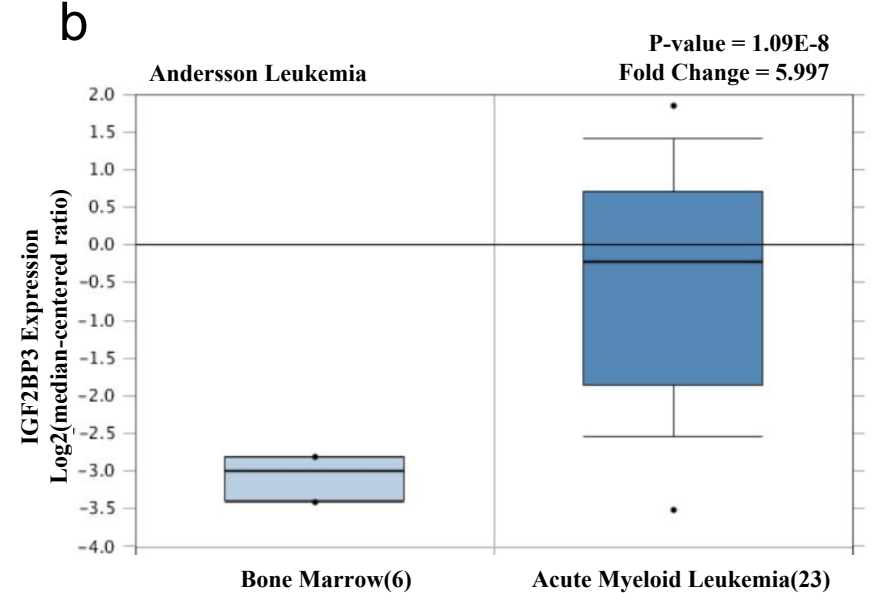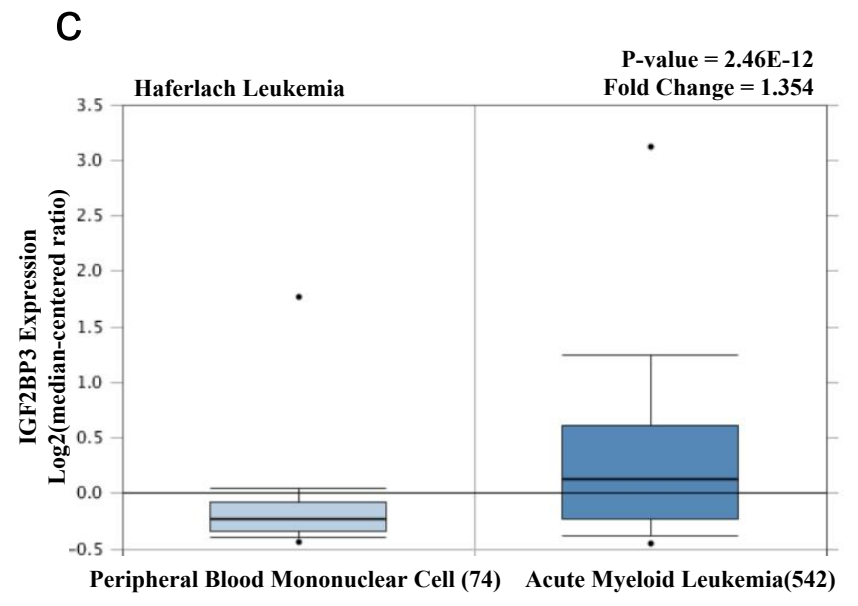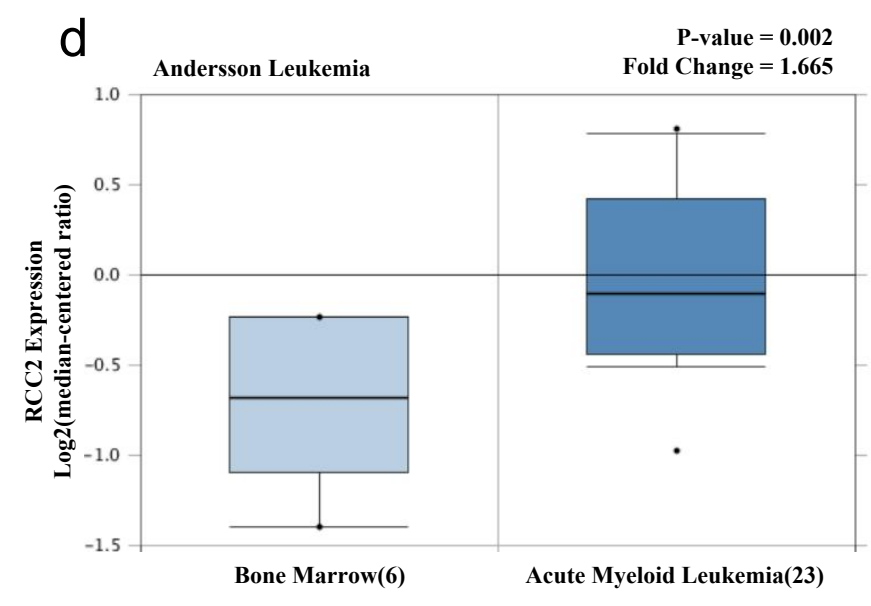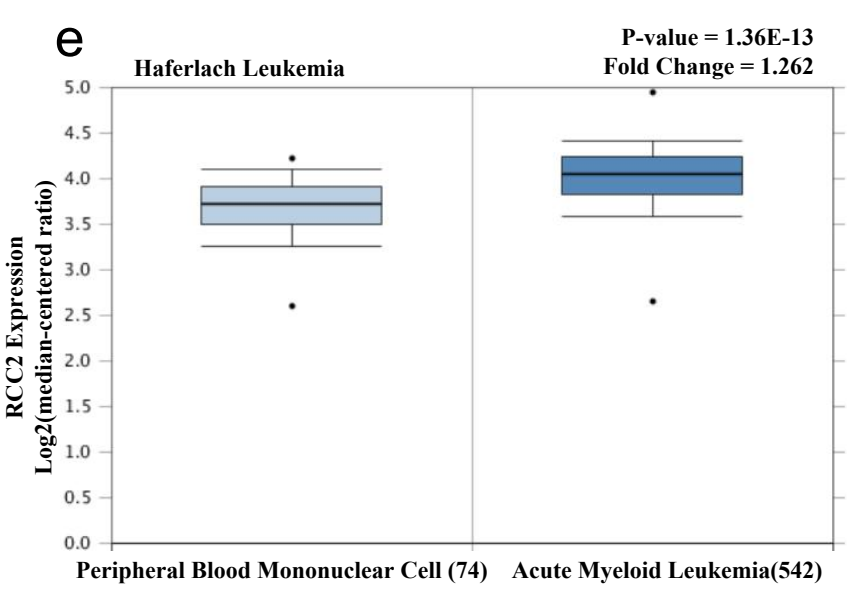

**Supplementary Fig. 2.** The expression of IGF2BP3 and RCC2 was analyzed in Oncomine database. **(a)** The Oncomine database was used to compare YAP1 expression in pan-tumors and corresponding normal tissues. **(b-c)** Upregulation of IGF2BP3 was observed compared with the normal controls in Andersson Leukemia and Haferlach Leukemia cohorts. **(d-e)** RCC2 high expression in Andersson Leukemia and Haferlach Leukemia cohorts.

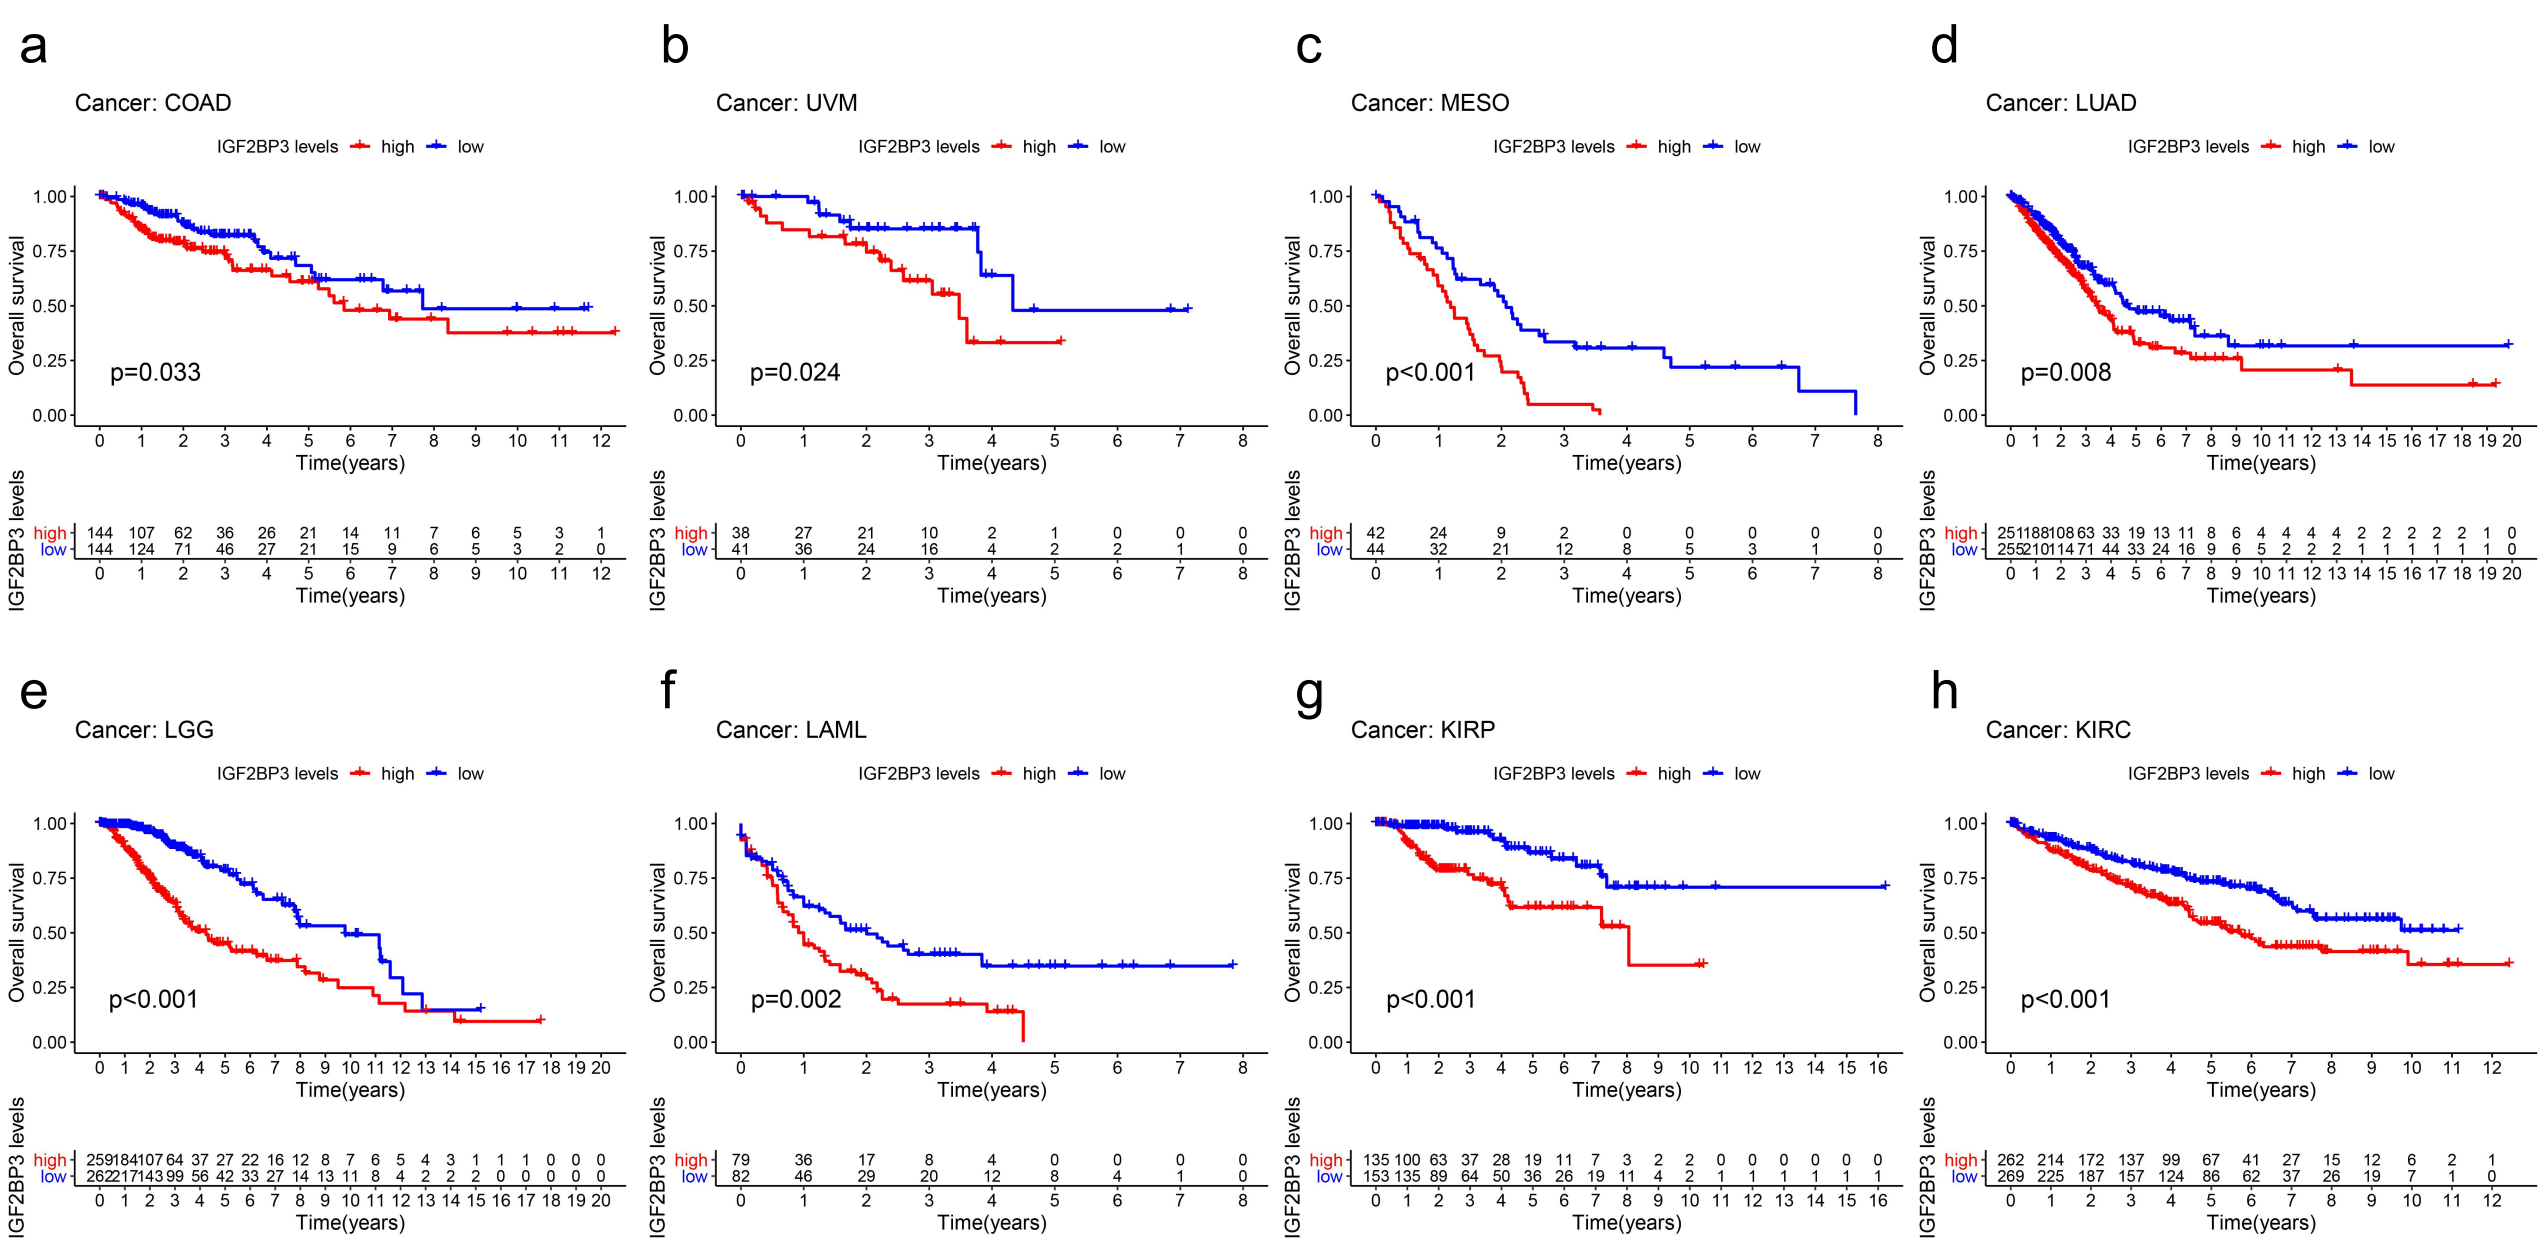

**Supplementary Fig. 3.** Survival analysis of IGF2BP3 in various tumors from the TCGA database. **(a)** Colon adenocarcinoma, COAD. **(b)** Uveal Melanoma, UVM. **(c)** Mesothelioma, MESO. **(d)** Lung adenocarcinoma, LUAD. **(e)** Brain Lower Grade Glioma, LGG. **(f)** Acute Myeloid Leukemia, LAML. **(g)** Kidney renal papillary cell carcinoma, KIRP. **(h)** Kidney renal clear cell carcinoma, KIRC.

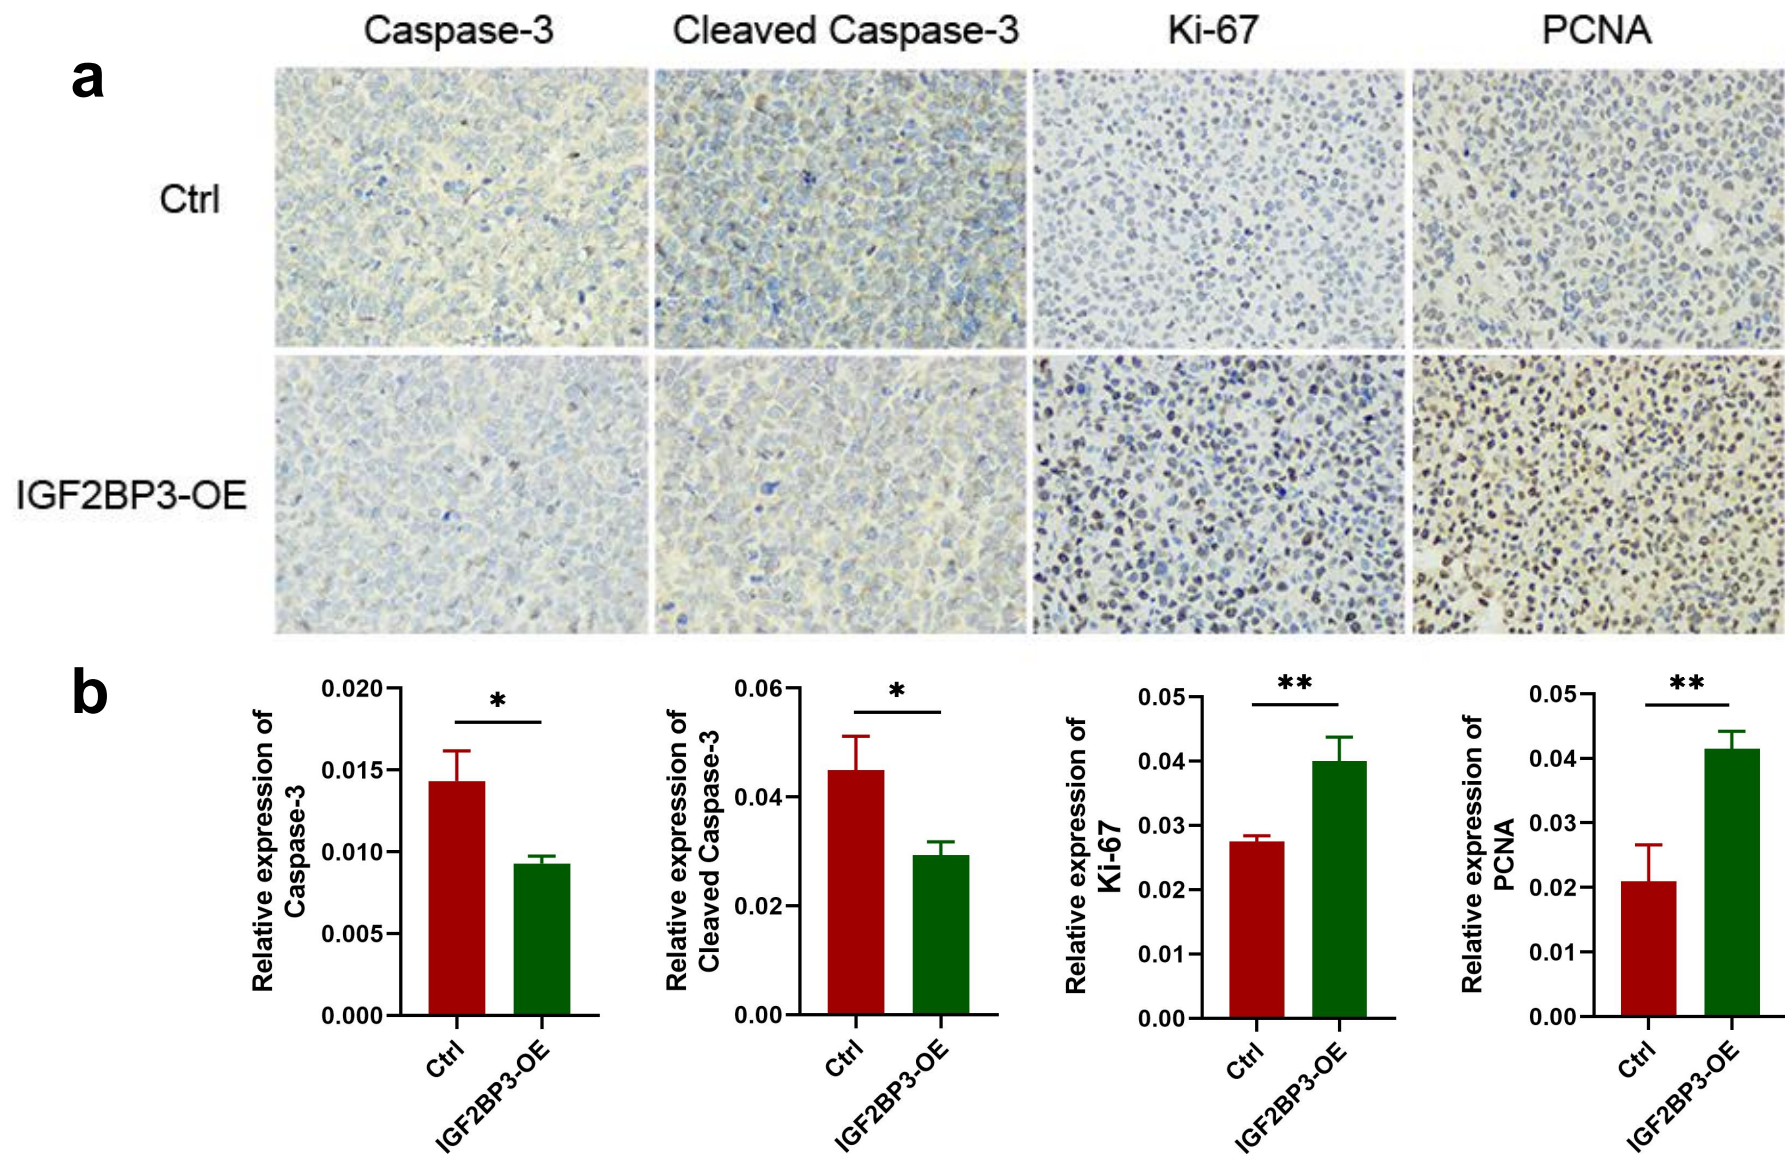

**Supplementary Fig. 4.** Representative immunohistochemical images of IGF2BP3 overexpression were provided (a), and immunohistochemical intensity was scored (b). \*,  $P < 0.05$ ; \*\*,  $P < 0.01$ .

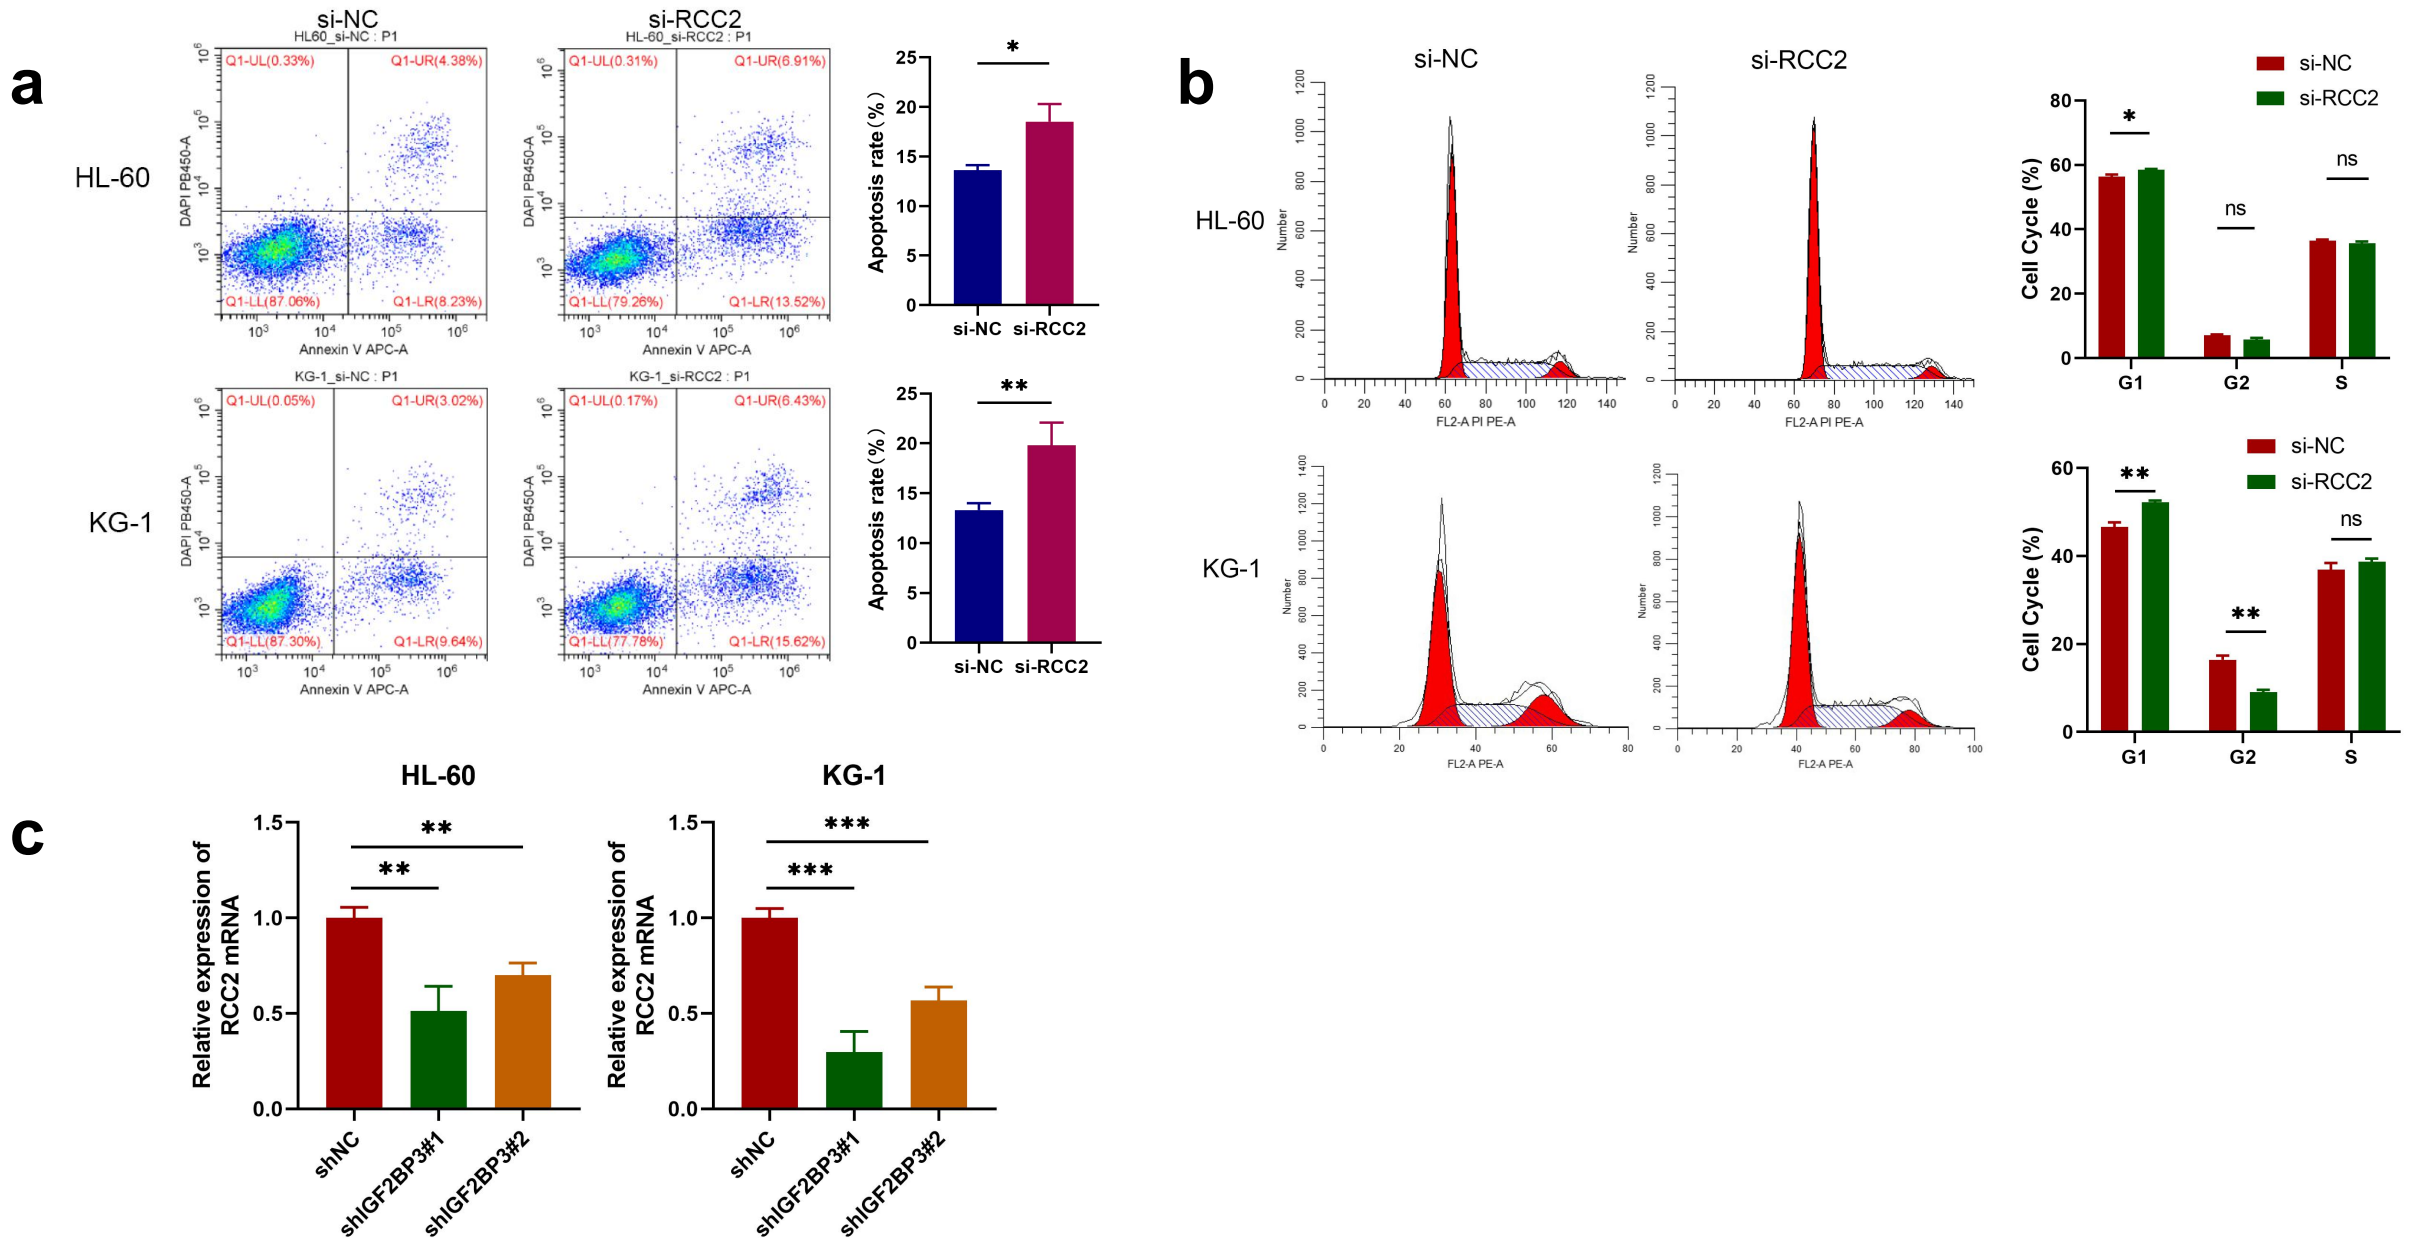

**Supplementary Fig. 5.** Effect of RCC2-siRNA on apoptosis of HL-60 and KG-1 cells. **(a)** RCC2 siRNA promotes apoptosis of AML cells. **(b)** Effect of RCC2 siRNA on AML cell cycle. **(c)** RCC2 mRNA expression levels following knockdown of IGF2BP3 in HL-60 and KG-1 cells. \*,  $P < 0.05$ ; \*\*,  $P < 0.01$ ; \*\*\*,  $P < 0.001$ .

**Supplementary Table 1. Primers and sequences used in this research (5'-3').**

|                                    |                 |                          |
|------------------------------------|-----------------|--------------------------|
| <b>shRNA<br/>target<br/>oligo</b>  | shIGF2BP3#1     | gcACATTTAATTCCTGGATTA    |
|                                    | shIGF2BP3#2     | GCAGGAATTGACGCTGTAT      |
|                                    | si-RCC2#1       | GGGACUUGAUUGGUCGAAATT    |
|                                    | si-RCC2#2       | GGGCUGAAUUCAGUAUGAUTT    |
|                                    | si-RCC2#3       | GGUGAUAGCAAGAGAUGAATT    |
| <b>Primers<br/>used in<br/>PCR</b> | IGF2BP3 forward | GGGAGGTGCTGGATAGTTTAC    |
|                                    | IGF2BP3 reverse | CTAGCTTGGTCCTTACTGGAATAG |
|                                    | RCC2 forward    | ACACCTCCCGTGAATCTACC     |
|                                    | RCC2 reverse    | ATGCCATCCAGAGTCTTTACCT   |
|                                    | GAPDH forward   | CAGGAGGCATTGCTGATGAT     |
|                                    | GAPDH reverse   | GAAGGCTGGGGCTCATTT       |
|                                    | ACTIN forward   | CGTGGACATCCGCAAAG        |
|                                    | ACTIN reverse   | AAGGTGGACAGCGAGGC        |

**Supplementary Table 2. Clinical characteristics of Acute Myeloid Leukaemia patients in our cohort.**

| Patient_ID | Sample_ID  | Age | Sex    | Diagnosis                    | Category                                | Cytogenetic Code          | WBC / $\times 10^9$ /L | Blast Percentage /% | Admission time | IGF2BP3 Relative Expression |
|------------|------------|-----|--------|------------------------------|-----------------------------------------|---------------------------|------------------------|---------------------|----------------|-----------------------------|
| Liu**      | 2019FG1077 | 54  | Male   | Acute Myeloid Leukaemia      | AML-M2                                  | NPM1, IDH2mut             | 8.6                    | 85.16               | 12-Aug-19      | 1                           |
| Dong**     | 2019FG1877 | 78  | Male   | Acute Myeloid Leukaemia      | AML-M2                                  | AML1/ETO positive         | 62.4                   | 74                  | 20-Oct-19      | 0.2161193                   |
| Li**       | 2020FG0111 | 56  | Female | Acute Myeloid Leukaemia      | AML with myelodysplasia-related changes | TET2                      | 21.47                  | 56                  | 03-Jan-20      | 0.8803533                   |
| Peng**     | 2020FG0112 | 65  | Male   | Acute Myeloid Leukaemia      | AML-M1                                  | na                        | 299.5                  | 90                  | 06-Jan-20      | 0.1855181                   |
| Rao**      | 2020FG1452 | 34  | Female | Acute Promyelocytic Leukemia | AML-M3                                  | PML/RARA positive         | 0.34                   | 73                  | 18-Apr-20      | 0.1756742                   |
| Ding**     | 2020FG2336 | 64  | Female | Acute Myeloid Leukaemia      | AML with myelodysplasia-related         | na                        | 0.6                    | 28                  | 11-Jun-20      | 0.1335005                   |
| Tian**     | 2020FG3767 | 26  | Female | Acute Myeloid Leukaemia      | AML-M4                                  | SF3B1 positive            | 3.91                   | 22                  | 03-Sep-20      | 0.9634103                   |
| Liao**     | 2020FG3882 | 61  | Male   | Acute Myeloid Leukaemia      | AML-M5                                  | CEBPA-double-mutated, IDH | 85                     | 88                  | 10-Sep-20      | 0.320684                    |
| Xie*       | 2020FG5424 | 12  | Female | Acute Myeloid Leukaemia      | AML-M2                                  | CEBPA-double-mutated      | 199.4                  | 12                  | 28-Nov-20      | 0.1263313                   |
| Qiu*       | 2020FG5697 | 16  | Female | Iron deficiency anemia       | na                                      | na                        | 8.13                   | na                  | 14-Dec-20      | 0.0322063                   |
| Zhang*     | 2020FG5745 | 48  | Female | Iron deficiency anemia       | na                                      | na                        | na                     | na                  | 16-Dec-20      | 0.0578761                   |
| Tang**     | 2020FG5882 | 47  | Female | Iron deficiency anemia       | na                                      | na                        | na                     | na                  | 25-Dec-20      | 0.0439013                   |
| Qian**     | 2020FG5880 | 35  | Female | Iron deficiency anemia       | na                                      | na                        | na                     | na                  | 25-Dec-20      | 0.0341697                   |
| Wang**     | 2020FG5881 | 47  | Male   | Iron deficiency anemia       | na                                      | na                        | na                     | na                  | 25-Dec-20      | 0.0921058                   |

**Supplementary Table 3. DESeq results from comparison of IGF2BP3-depleted and control cells**

| Gene_Symbol | Gene_ID        | Trans_Type          | BaseMean_shTreat | BaseMean_shNC | FoldChange | Log2FoldChange | Pval     | Direction |
|-------------|----------------|---------------------|------------------|---------------|------------|----------------|----------|-----------|
| MS4A6A      | ENSG0000011007 | retained_intron;pro | 0.1383           | 4.9434        | 0.03       | -5.16          | 1.21E-60 | down      |
| TIFAB       | ENSG0000025583 | protein_coding      | 0.0047           | 1.7223        | 0.00       | -8.52          | 1.71E-54 | down      |
| CD180       | ENSG0000013406 | protein_coding;ret  | 0.0351           | 1.7733        | 0.02       | -5.66          | 1.03E-47 | down      |
| MTUS1       | ENSG0000012942 | protein_coding;pro  | 0.0060           | 0.6473        | 0.01       | -6.74          | 3.09E-47 | down      |
| IL31RA      | ENSG0000016450 | protein_coding;pro  | 0.0001           | 0.8280        | 0.00       | -13.02         | 1.54E-44 | down      |
| ARL8B       | ENSG0000013410 | protein_coding;ret  | 55.2349          | 12.7999       | 4.32       | 2.11           | 8.15E-42 | up        |
| MYOF        | ENSG0000013811 | protein_coding;pro  | 0.0290           | 1.1479        | 0.03       | -5.31          | 3.52E-40 | down      |
| FCER2       | ENSG0000010492 | protein_coding;ret  | 0.0948           | 6.6250        | 0.01       | -6.13          | 6.04E-38 | down      |
| IRF8        | ENSG0000014096 | protein_coding;ret  | 0.1451           | 2.9010        | 0.05       | -4.32          | 4.63E-37 | down      |
| BEX1        | ENSG0000013316 | protein_coding      | 8.0294           | 52.6597       | 0.15       | -2.71          | 6.51E-37 | down      |
| ZNF445      | ENSG0000018521 | protein_coding;ret  | 0.3083           | 2.1067        | 0.15       | -2.77          | 5.71E-36 | down      |
| LILRB4      | ENSG0000018681 | protein_coding;no   | 0.0103           | 1.1171        | 0.01       | -6.77          | 6.80E-36 | down      |
| METTL7B     | ENSG0000017043 | protein_coding      | 0.2629           | 7.5841        | 0.03       | -4.85          | 4.38E-35 | down      |
| GALM        | ENSG0000014389 | protein_coding;pro  | 0.0499           | 2.3990        | 0.02       | -5.59          | 5.86E-34 | down      |
| XAF1        | ENSG0000013253 | protein_coding;ret  | 0.0193           | 0.8939        | 0.02       | -5.53          | 5.35E-33 | down      |
| CD109       | ENSG0000015653 | protein_coding;pro  | 0.0669           | 1.9969        | 0.03       | -4.90          | 5.95E-33 | down      |
| INHBA-AS1   | ENSG0000022411 | antisense           | 0.0001           | 0.6101        | 0.00       | -12.57         | 2.41E-32 | down      |
| ADGRA2      | ENSG0000002018 | protein_coding      | 0.1440           | 2.9955        | 0.05       | -4.38          | 2.83E-30 | down      |
| TRPM8       | ENSG0000014448 | protein_coding;pro  | 0.0001           | 0.2915        | 0.00       | -11.51         | 2.17E-27 | down      |
| IVD         | ENSG0000012892 | protein_coding;ret  | 0.0978           | 1.2644        | 0.08       | -3.69          | 3.36E-26 | down      |
| C1orf21     | ENSG0000011666 | protein_coding;pro  | 0.0109           | 0.4222        | 0.03       | -5.28          | 3.91E-26 | down      |
| ADAM23      | ENSG0000011494 | protein_coding      | 0.0023           | 0.4014        | 0.01       | -7.42          | 8.73E-26 | down      |
| NPHP3-AC/   | ENSG0000027481 | nonsense_mediate    | 0.0001           | 0.3042        | 0.00       | -11.51         | 1.94E-25 | down      |
| AL365361    | ENSG0000025983 | lincRNA             | 0.0027           | 0.6325        | 0.00       | -7.88          | 6.76E-25 | down      |
| IGFBP2      | ENSG0000011545 | protein_coding;ret  | 0.5579           | 0.0038        | 146.01     | 7.19           | 1.02E-24 | up        |
| CLC         | ENSG0000010520 | protein_coding      | 601.4046         | 200.1856      | 3.00       | 1.59           | 5.92E-24 | up        |
| FGL2        | ENSG0000012795 | protein_coding      | 1.2718           | 6.6004        | 0.19       | -2.38          | 2.38E-23 | down      |
| ITGA7       | ENSG0000013542 | protein_coding;no   | 0.0469           | 0.7913        | 0.06       | -4.08          | 2.40E-23 | down      |
| AFF3        | ENSG0000014421 | protein_coding;no   | 0.0025           | 0.2805        | 0.01       | -6.83          | 2.95E-23 | down      |
| SASH1       | ENSG0000011196 | protein_coding;ret  | 0.0024           | 0.2708        | 0.01       | -6.80          | 1.07E-22 | down      |
| ALDH5A1     | ENSG0000011229 | protein_coding;ret  | 3.1297           | 0.4924        | 6.36       | 2.67           | 3.62E-22 | up        |
| WDR49       | ENSG0000017477 | protein_coding;pro  | 0.0001           | 0.3276        | 0.00       | -11.68         | 2.12E-20 | down      |
| PTPN3       | ENSG0000007015 | protein_coding;pro  | 0.6590           | 0.0453        | 14.56      | 3.86           | 3.67E-20 | up        |
| GPNMB       | ENSG0000013623 | protein_coding;ret  | 0.5483           | 3.3193        | 0.17       | -2.60          | 3.77E-20 | down      |
| MT1G        | ENSG0000012514 | protein_coding      | 12.3818          | 1.6129        | 7.68       | 2.94           | 2.20E-19 | up        |
| EPX         | ENSG0000012105 | protein_coding      | 137.2264         | 46.7979       | 2.93       | 1.55           | 3.84E-19 | up        |
| PDPK1       | ENSG0000014099 | protein_coding;ret  | 0.6975           | 2.8548        | 0.24       | -2.03          | 9.09E-19 | down      |
| MS4A7       | ENSG0000016692 | protein_coding;ret  | 0.0329           | 1.0826        | 0.03       | -5.04          | 9.23E-19 | down      |
| RXFP1       | ENSG0000017150 | protein_coding;pro  | 0.0116           | 0.4050        | 0.03       | -5.13          | 1.54E-18 | down      |
| CADM1       | ENSG0000018298 | protein_coding;ret  | 0.0252           | 0.4096        | 0.06       | -4.02          | 1.58E-18 | down      |
| INHBA       | ENSG0000012264 | protein_coding;pro  | 0.0034           | 0.2746        | 0.01       | -6.32          | 3.19E-18 | down      |
| CD52        | ENSG0000016944 | protein_coding;pro  | 63.4170          | 22.5819       | 2.81       | 1.49           | 8.44E-18 | up        |
| SPP1        | ENSG0000011878 | protein_coding;pro  | 5.8676           | 1.0433        | 5.62       | 2.49           | 1.04E-17 | up        |
| GNG10       | ENSG0000024261 | protein_coding      | 2.1559           | 14.2025       | 0.15       | -2.72          | 1.14E-17 | down      |



|           |                |                     |           |           |        |       |          |      |
|-----------|----------------|---------------------|-----------|-----------|--------|-------|----------|------|
| HGF       | ENSG0000001999 | protein_coding;ret  | 0.9287    | 3.6591    | 0.25   | -1.98 | 1.75E-17 | down |
| NAV3      | ENSG0000006779 | protein_coding;ret  | 1.2691    | 4.0974    | 0.31   | -1.69 | 3.61E-17 | down |
| PADI4     | ENSG0000015933 | protein_coding;pro  | 21.2445   | 7.7026    | 2.76   | 1.46  | 3.83E-17 | up   |
| DTNA      | ENSG0000013476 | protein_coding;pro  | 0.0522    | 0.6517    | 0.08   | -3.64 | 4.26E-17 | down |
| DTX4      | ENSG0000011004 | protein_coding;ret  | 1.4265    | 0.2165    | 6.59   | 2.72  | 4.56E-17 | up   |
| CERS6     | ENSG0000017229 | protein_coding      | 7.1225    | 17.3761   | 0.41   | -1.29 | 5.95E-17 | down |
| ADA2      | ENSG0000009307 | protein_coding;pro  | 0.1209    | 0.9528    | 0.13   | -2.98 | 8.13E-17 | down |
| S100A9    | ENSG0000016322 | protein_coding      | 2672.9503 | 1053.2792 | 2.54   | 1.34  | 8.87E-17 | up   |
| HDAC9     | ENSG0000004805 | protein_coding;ret  | 0.0178    | 0.3542    | 0.05   | -4.31 | 1.81E-16 | down |
| PRG2      | ENSG0000018665 | retained_intron;pro | 4121.7804 | 1553.5761 | 2.65   | 1.41  | 2.37E-16 | up   |
| FYN       | ENSG0000001081 | protein_coding;ret  | 0.0324    | 0.5918    | 0.05   | -4.19 | 3.66E-16 | down |
| STEAP4    | ENSG0000012795 | protein_coding      | 1.3128    | 0.2526    | 5.20   | 2.38  | 5.42E-16 | up   |
| AL359762  | ENSG0000028585 | processed_transcri  | 2.5687    | 0.0960    | 26.77  | 4.74  | 6.69E-16 | up   |
| PHF10     | ENSG0000013002 | protein_coding;ret  | 7.1470    | 16.9495   | 0.42   | -1.25 | 2.08E-15 | down |
| NAPSB     | ENSG0000013140 | transcribed_unpro   | 0.2915    | 2.3088    | 0.13   | -2.99 | 4.04E-15 | down |
| HLA-DRA   | ENSG0000020428 | protein_coding      | 0.0621    | 1.9986    | 0.03   | -5.01 | 1.10E-14 | down |
| CR1       | ENSG0000020371 | protein_coding;ret  | 9.7457    | 3.6594    | 2.66   | 1.41  | 1.53E-14 | up   |
| EMP1      | ENSG0000013453 | protein_coding;pro  | 0.0482    | 0.4651    | 0.10   | -3.27 | 2.09E-14 | down |
| CPA3      | ENSG0000016375 | protein_coding;ret  | 3.2682    | 0.3794    | 8.61   | 3.11  | 2.62E-14 | up   |
| LOXHD1    | ENSG0000016721 | protein_coding;ret  | 0.0205    | 0.3048    | 0.07   | -3.89 | 3.62E-14 | down |
| LY86      | ENSG0000011279 | protein_coding      | 1.5430    | 7.6808    | 0.20   | -2.32 | 3.74E-14 | down |
| SEPT3     | ENSG0000010016 | protein_coding;ret  | 0.0860    | 0.6336    | 0.14   | -2.88 | 6.48E-14 | down |
| NCF1      | ENSG0000015851 | protein_coding;ret  | 22.3825   | 8.9779    | 2.49   | 1.32  | 7.60E-14 | up   |
| ADD2      | ENSG0000007534 | protein_coding;pro  | 0.0137    | 0.1903    | 0.07   | -3.79 | 9.71E-14 | down |
| POC1B-GAI | ENSG0000025907 | protein_coding      | 1.1298    | 0.0036    | 313.45 | 8.29  | 1.22E-13 | up   |
| CDC42BPA  | ENSG0000014377 | protein_coding;pro  | 0.4128    | 0.0426    | 9.68   | 3.28  | 2.55E-13 | up   |
| PRLR      | ENSG0000011349 | protein_coding;no   | 0.0248    | 0.2615    | 0.09   | -3.40 | 3.59E-13 | down |
| S100A8    | ENSG0000014354 | protein_coding;pro  | 491.6053  | 225.3193  | 2.18   | 1.13  | 3.86E-13 | up   |
| ZDBF2     | ENSG0000020418 | protein_coding;no   | 0.0059    | 0.1581    | 0.04   | -4.74 | 6.92E-13 | down |
| WASF3     | ENSG0000013297 | protein_coding;pro  | 0.1830    | 0.0036    | 50.55  | 5.66  | 6.92E-13 | up   |
| CLSTN2    | ENSG0000015825 | protein_coding;ret  | 0.0029    | 0.1304    | 0.02   | -5.48 | 7.25E-13 | down |
| NCF1C     | ENSG0000016517 | unprocessed_pseu    | 33.3546   | 13.3115   | 2.51   | 1.33  | 1.16E-12 | up   |
| SMIM12    | ENSG0000016386 | protein_coding;no   | 2.7584    | 6.3501    | 0.43   | -1.20 | 1.21E-12 | down |
| YTHDF2    | ENSG0000019849 | protein_coding;pro  | 9.0895    | 22.8858   | 0.40   | -1.33 | 1.28E-12 | down |
| MGAM      | ENSG0000025733 | protein_coding;ret  | 9.5572    | 4.3963    | 2.17   | 1.12  | 1.50E-12 | up   |
| LSM5      | ENSG0000010635 | protein_coding;no   | 6.6853    | 14.8633   | 0.45   | -1.15 | 3.19E-12 | down |
| KCNH2     | ENSG0000005511 | protein_coding;ret  | 3.0862    | 0.9194    | 3.36   | 1.75  | 3.27E-12 | up   |
| SLC41A1   | ENSG0000013306 | protein_coding;pro  | 0.0062    | 0.2269    | 0.03   | -5.20 | 4.23E-12 | down |
| HLA-B     | ENSG0000023474 | retained_intron;pro | 125.4714  | 270.5205  | 0.46   | -1.11 | 4.94E-12 | down |
| CLIP4     | ENSG0000011529 | protein_coding;ret  | 0.0074    | 0.1806    | 0.04   | -4.60 | 5.84E-12 | down |
| ABCB4     | ENSG0000000547 | protein_coding;ret  | 0.0001    | 0.0902    | 0.00   | -9.82 | 8.77E-12 | down |
| MSH6      | ENSG0000011606 | protein_coding;no   | 7.7162    | 15.7190   | 0.49   | -1.03 | 8.77E-12 | down |
| IREB2     | ENSG0000013638 | protein_coding;no   | 3.9083    | 8.1572    | 0.48   | -1.06 | 9.86E-12 | down |
| TNS1      | ENSG0000007930 | protein_coding;ret  | 0.0027    | 0.0688    | 0.04   | -4.69 | 1.05E-11 | down |
| RHEX      | ENSG0000026396 | protein_coding;ret  | 14.2290   | 4.5701    | 3.11   | 1.64  | 1.47E-11 | up   |
| TRGC1     | ENSG0000021168 | TR_C_gene           | 15.5792   | 32.4249   | 0.48   | -1.06 | 1.62E-11 | down |
| IL9R      | ENSG0000012433 | protein_coding;pro  | 2.4561    | 0.4876    | 5.04   | 2.33  | 1.69E-11 | up   |
| TGM5      | ENSG0000010405 | protein_coding;ret  | 5.0594    | 12.1859   | 0.42   | -1.27 | 1.71E-11 | down |

|           |                |                      |         |         |         |       |          |      |
|-----------|----------------|----------------------|---------|---------|---------|-------|----------|------|
| HTR7      | ENSG0000014868 | protein_coding       | 0.0165  | 0.4355  | 0.04    | -4.72 | 1.96E-11 | down |
| OAT       | ENSG0000006515 | protein_coding;proc  | 1.7515  | 0.3626  | 4.83    | 2.27  | 2.05E-11 | up   |
| SEL1L3    | ENSG0000009149 | protein_coding;ret   | 1.8274  | 4.8746  | 0.37    | -1.42 | 2.06E-11 | down |
| HPGD      | ENSG0000016412 | protein_coding;ret   | 2.0883  | 0.5589  | 3.74    | 1.90  | 2.27E-11 | up   |
| MT2A      | ENSG0000012514 | protein_coding;ret   | 88.8864 | 39.3008 | 2.26    | 1.18  | 2.84E-11 | up   |
| ITGAX     | ENSG0000014067 | protein_coding;ret   | 5.8394  | 2.2802  | 2.56    | 1.36  | 3.24E-11 | up   |
| H2AFY2    | ENSG0000009928 | protein_coding       | 0.5632  | 0.0185  | 30.45   | 4.93  | 4.32E-11 | up   |
| MRTFB     | ENSG0000018626 | protein_coding;proc  | 0.3024  | 0.0555  | 5.44    | 2.44  | 4.76E-11 | up   |
| PRSS33    | ENSG0000010335 | protein_coding       | 0.4150  | 0.0106  | 39.04   | 5.29  | 4.91E-11 | up   |
| DLX1      | ENSG0000014435 | retained_intron;proc | 0.9835  | 3.5139  | 0.28    | -1.84 | 7.46E-11 | down |
| RBM15     | ENSG0000016277 | protein_coding       | 0.9399  | 3.3398  | 0.28    | -1.83 | 8.38E-11 | down |
| AOC1      | ENSG0000000272 | protein_coding;proc  | 6.8944  | 2.0249  | 3.40    | 1.77  | 8.93E-11 | up   |
| RECK      | ENSG0000012270 | protein_coding;proc  | 0.1269  | 0.7323  | 0.17    | -2.53 | 9.32E-11 | down |
| PLCB4     | ENSG0000010133 | processed_transcript | 0.0650  | 0.5026  | 0.13    | -2.95 | 9.74E-11 | down |
| STARD8    | ENSG0000013005 | protein_coding;proc  | 0.0098  | 0.3434  | 0.03    | -5.12 | 1.07E-10 | down |
| C11orf45  | ENSG0000017437 | protein_coding;proc  | 0.0231  | 0.4043  | 0.06    | -4.13 | 2.06E-10 | down |
| APOC1     | ENSG0000013020 | protein_coding;no    | 0.1170  | 1.1765  | 0.10    | -3.33 | 2.25E-10 | down |
| VNN2      | ENSG0000011230 | nonsense_mediated    | 18.1123 | 7.4215  | 2.44    | 1.29  | 2.41E-10 | up   |
| KYNU      | ENSG0000011591 | protein_coding;ret   | 0.0089  | 0.0814  | 0.11    | -3.20 | 3.10E-10 | down |
| GNAI2     | ENSG0000011435 | protein_coding;ret   | 24.0469 | 46.6122 | 0.52    | -0.95 | 3.31E-10 | down |
| TNS3      | ENSG0000013620 | protein_coding;proc  | 0.0107  | 0.1259  | 0.09    | -3.55 | 3.62E-10 | down |
| TIMP1     | ENSG0000010226 | protein_coding       | 48.1324 | 23.7837 | 2.02    | 1.02  | 4.52E-10 | up   |
| AC006011  | ENSG0000024456 | processed_pseudogen  | 0.1690  | 23.5245 | 0.01    | -7.12 | 5.30E-10 | down |
| H1FO      | ENSG0000018906 | protein_coding       | 1.4268  | 5.1734  | 0.28    | -1.86 | 5.55E-10 | down |
| VPS4A     | ENSG0000013261 | protein_coding;proc  | 6.6146  | 12.9607 | 0.51    | -0.97 | 5.99E-10 | down |
| LINC01670 | ENSG0000027909 | lincRNA              | 0.9002  | 0.0001  | 9002.15 | 13.14 | 6.19E-10 | up   |
| ACOT2     | ENSG0000011967 | nonsense_mediated    | 0.0514  | 0.8639  | 0.06    | -4.07 | 6.55E-10 | down |
| EPAS1     | ENSG0000011601 | retained_intron;proc | 0.5073  | 0.0955  | 5.31    | 2.41  | 6.60E-10 | up   |
| ANAPC13   | ENSG0000012905 | protein_coding;ret   | 4.7574  | 14.5220 | 0.33    | -1.61 | 6.68E-10 | down |
| NOB1      | ENSG0000014110 | protein_coding;no    | 29.8780 | 56.5100 | 0.53    | -0.92 | 8.51E-10 | down |
| TMEM121B  | ENSG0000018330 | protein_coding       | 0.0576  | 0.4710  | 0.12    | -3.03 | 8.54E-10 | down |
| FPR1      | ENSG0000017105 | protein_coding       | 30.9062 | 14.9025 | 2.07    | 1.05  | 8.57E-10 | up   |
| SLC16A1   | ENSG0000015538 | protein_coding;proc  | 11.6687 | 22.5796 | 0.52    | -0.95 | 8.60E-10 | down |
| NCF1B     | ENSG0000018248 | processed_transcript | 21.8829 | 9.1454  | 2.39    | 1.26  | 1.05E-09 | up   |
| MIR155HG  | ENSG0000023488 | lincRNA              | 0.3595  | 1.9911  | 0.18    | -2.47 | 1.17E-09 | down |
| NOG       | ENSG0000018369 | protein_coding       | 0.1128  | 1.0327  | 0.11    | -3.19 | 1.28E-09 | down |
| DPYSL2    | ENSG0000009296 | protein_coding;ret   | 0.1228  | 0.5966  | 0.21    | -2.28 | 1.43E-09 | down |
| HDC       | ENSG0000014028 | protein_coding;ret   | 1.9853  | 0.4848  | 4.09    | 2.03  | 1.58E-09 | up   |
| DKK2      | ENSG0000015501 | protein_coding;ret   | 0.0365  | 0.3122  | 0.12    | -3.10 | 1.62E-09 | down |
| HERC5     | ENSG0000013864 | protein_coding;ret   | 4.1784  | 1.4449  | 2.89    | 1.53  | 1.91E-09 | up   |
| TNFSF15   | ENSG0000018163 | protein_coding       | 0.3585  | 0.0558  | 6.42    | 2.68  | 2.26E-09 | up   |
| NCOA1     | ENSG0000008467 | protein_coding;ret   | 1.8863  | 0.6086  | 3.10    | 1.63  | 2.44E-09 | up   |
| FCN1      | ENSG0000008526 | protein_coding       | 2.9873  | 1.1305  | 2.64    | 1.40  | 2.78E-09 | up   |
| CPNE8     | ENSG0000013911 | protein_coding;proc  | 0.0396  | 0.3693  | 0.11    | -3.22 | 3.26E-09 | down |
| LRRK2     | ENSG0000018890 | protein_coding;ret   | 1.7605  | 0.6666  | 2.64    | 1.40  | 3.57E-09 | up   |
| COCH      | ENSG0000010047 | protein_coding;proc  | 24.7352 | 11.9732 | 2.07    | 1.05  | 3.61E-09 | up   |
| RNF114    | ENSG0000012422 | protein_coding;ret   | 11.6927 | 24.3220 | 0.48    | -1.06 | 3.68E-09 | down |
| SMAD3     | ENSG0000016694 | protein_coding;ret   | 0.9474  | 2.4974  | 0.38    | -1.40 | 3.84E-09 | down |

|           |                                    |           |           |       |        |          |      |
|-----------|------------------------------------|-----------|-----------|-------|--------|----------|------|
| PDZD7     | ENSG0000018686:protein_coding;no   | 0.4334    | 1.4393    | 0.30  | -1.73  | 4.15E-09 | down |
| ZNRD1     | ENSG0000006637:protein_coding;ret  | 4.6683    | 10.7492   | 0.43  | -1.20  | 4.28E-09 | down |
| CCR2      | ENSG0000012180:protein_coding;pro  | 1.1847    | 3.6322    | 0.33  | -1.62  | 4.56E-09 | down |
| NRP2      | ENSG0000011825:protein_coding;pro  | 0.0085    | 0.0993    | 0.09  | -3.55  | 5.96E-09 | down |
| THSD7A    | ENSG0000000510:protein_coding;pro  | 0.0867    | 0.0060    | 14.34 | 3.84   | 6.71E-09 | up   |
| CLEC2B    | ENSG0000011085:protein_coding;ret  | 0.7702    | 2.9031    | 0.27  | -1.91  | 7.30E-09 | down |
| RNASE2    | ENSG0000016938:protein_coding      | 281.7874  | 150.1965  | 1.88  | 0.91   | 7.44E-09 | up   |
| OGFRL1    | ENSG0000011990:protein_coding;pro  | 7.2733    | 13.3491   | 0.54  | -0.88  | 7.51E-09 | down |
| AFF1      | ENSG0000017249:protein_coding;ret  | 1.3094    | 3.6550    | 0.36  | -1.48  | 7.60E-09 | down |
| IKZF3     | ENSG0000016140:protein_coding;no   | 0.3276    | 0.0616    | 5.32  | 2.41   | 7.90E-09 | up   |
| IFI30     | ENSG0000021649:protein_coding;ret  | 111.8283  | 61.1478   | 1.83  | 0.87   | 8.46E-09 | up   |
| DFFB      | ENSG0000016959:protein_coding;no   | 1.6556    | 4.5092    | 0.37  | -1.45  | 9.66E-09 | down |
| TATDN1    | ENSG0000014768:protein_coding;no   | 3.6212    | 8.0119    | 0.45  | -1.15  | 1.00E-08 | down |
| LILRA5    | ENSG0000018711:protein_coding;ret  | 7.9305    | 2.5516    | 3.11  | 1.64   | 1.07E-08 | up   |
| LY9       | ENSG0000012222:protein_coding;pro  | 0.0577    | 0.3157    | 0.18  | -2.45  | 1.08E-08 | down |
| VWDE      | ENSG0000014653:nonsense_mediate    | 0.3848    | 0.0529    | 7.27  | 2.86   | 1.32E-08 | up   |
| STC2      | ENSG0000011373:protein_coding;pro  | 0.3239    | 1.1568    | 0.28  | -1.84  | 1.37E-08 | down |
| RGS1      | ENSG0000009010:protein_coding;ret  | 0.4164    | 1.5415    | 0.27  | -1.89  | 1.48E-08 | down |
| MEF2D     | ENSG0000011660:retained_intron;pro | 3.6306    | 7.5913    | 0.48  | -1.06  | 1.52E-08 | down |
| PLEKHA1   | ENSG0000010767:protein_coding;pro  | 0.4803    | 0.1574    | 3.05  | 1.61   | 2.07E-08 | up   |
| PDIA4     | ENSG0000015566:protein_coding;ret  | 82.0390   | 42.7898   | 1.92  | 0.94   | 2.17E-08 | up   |
| RET       | ENSG0000016573:protein_coding;ret  | 0.4398    | 1.4231    | 0.31  | -1.69  | 2.21E-08 | down |
| AC114786  | ENSG0000024976:processed_pseudo;   | 0.5927    | 0.0625    | 9.48  | 3.24   | 2.39E-08 | up   |
| ATP1A1    | ENSG0000016339:protein_coding;pro  | 23.2201   | 41.8795   | 0.55  | -0.85  | 2.79E-08 | down |
| THBS1     | ENSG0000013780:protein_coding;ret  | 3.3072    | 1.4308    | 2.31  | 1.21   | 3.59E-08 | up   |
| ZNF320    | ENSG0000018298:protein_coding;pro  | 0.0298    | 0.1806    | 0.17  | -2.60  | 3.75E-08 | down |
| ROR2      | ENSG0000016907:protein_coding;pro  | 0.0837    | 0.5672    | 0.15  | -2.76  | 3.77E-08 | down |
| HNRNPA1P  | ENSG0000022093:processed_pseudo;   | 0.0001    | 1.0907    | 0.00  | -13.41 | 5.18E-08 | down |
| CRIM1     | ENSG0000015093:protein_coding;pro  | 1.7033    | 0.5857    | 2.91  | 1.54   | 5.71E-08 | up   |
| GAS5      | ENSG0000023474:lincRNA;retained_   | 31.5385   | 55.8085   | 0.57  | -0.82  | 5.74E-08 | down |
| GATA2     | ENSG0000017934:protein_coding;pro  | 7.8981    | 3.5589    | 2.22  | 1.15   | 5.87E-08 | up   |
| SYS1-DBN1 | ENSG0000025480:nonsense_mediate    | 0.0001    | 1.7994    | 0.00  | -14.14 | 5.89E-08 | down |
| GPR174    | ENSG0000014713:protein_coding      | 0.3811    | 0.0621    | 6.14  | 2.62   | 6.45E-08 | up   |
| SAMHD1    | ENSG0000010134:retained_intron;no  | 1.7872    | 3.9511    | 0.45  | -1.14  | 7.23E-08 | down |
| C2        | ENSG0000016627:protein_coding;no   | 0.0304    | 0.2896    | 0.10  | -3.25  | 7.59E-08 | down |
| FRMD4B    | ENSG0000011454:protein_coding;pro  | 0.3113    | 0.0617    | 5.04  | 2.33   | 7.93E-08 | up   |
| SRGN      | ENSG0000012286:processed_transcri  | 2605.4933 | 4518.8461 | 0.58  | -0.79  | 8.76E-08 | down |
| APOC4-APC | ENSG0000022491:nonsense_mediate    | 6.7868    | 0.9018    | 7.53  | 2.91   | 9.27E-08 | up   |
| ITGA2B    | ENSG0000000596:protein_coding;ret  | 1.3691    | 0.3580    | 3.82  | 1.93   | 9.31E-08 | up   |
| TNF       | ENSG0000023281:protein_coding      | 7.9897    | 19.6047   | 0.41  | -1.29  | 9.67E-08 | down |
| LINC00996 | ENSG0000024225:lincRNA             | 0.2244    | 1.2318    | 0.18  | -2.46  | 1.02E-07 | down |
| GALNT14   | ENSG0000015808:protein_coding;pro  | 1.0469    | 0.2870    | 3.65  | 1.87   | 1.07E-07 | up   |
| AC006001  | ENSG0000027540:processed_pseudo;   | 0.2102    | 7.1323    | 0.03  | -5.08  | 1.35E-07 | down |
| PDIA6     | ENSG0000014387:protein_coding;pro  | 143.3468  | 76.5909   | 1.87  | 0.90   | 1.39E-07 | up   |
| SNX27     | ENSG0000014337:protein_coding;ret  | 0.5858    | 1.3997    | 0.42  | -1.26  | 1.39E-07 | down |
| AC023906  | ENSG0000025971:antisense           | 0.3725    | 4.1770    | 0.09  | -3.49  | 1.39E-07 | down |
| IL1R1     | ENSG0000011559:protein_coding;no   | 2.4604    | 0.9216    | 2.67  | 1.42   | 1.68E-07 | up   |
| AL356417  | ENSG0000028549:lincRNA             | 0.0170    | 0.1074    | 0.16  | -2.66  | 1.68E-07 | down |

|           |                |                      |         |         |       |       |          |      |
|-----------|----------------|----------------------|---------|---------|-------|-------|----------|------|
| RGS2      | ENSG0000011674 | protein_coding;proc  | 8.5789  | 3.3493  | 2.56  | 1.36  | 1.71E-07 | up   |
| DDIT4L    | ENSG0000014535 | protein_coding       | 6.7591  | 2.8379  | 2.38  | 1.25  | 1.75E-07 | up   |
| PFN2      | ENSG0000007008 | protein_coding;no    | 0.7493  | 0.1553  | 4.82  | 2.27  | 1.91E-07 | up   |
| ZNF501    | ENSG0000018644 | protein_coding;proc  | 0.0106  | 0.2223  | 0.05  | -4.39 | 1.94E-07 | down |
| PRDX2     | ENSG0000016781 | protein_coding;ret   | 9.3058  | 3.8574  | 2.41  | 1.27  | 1.98E-07 | up   |
| AC068533  | ENSG0000024931 | protein_coding       | 1.3763  | 0.0001  | ##### | 13.75 | 2.22E-07 | up   |
| DLD       | ENSG0000009114 | retained_intron;proc | 14.8230 | 25.5839 | 0.58  | -0.79 | 2.26E-07 | down |
| CKB       | ENSG0000016616 | retained_intron;proc | 3.0144  | 0.9787  | 3.08  | 1.62  | 2.51E-07 | up   |
| NDRG2     | ENSG0000016579 | protein_coding;ret   | 0.2113  | 0.7009  | 0.30  | -1.73 | 2.69E-07 | down |
| FKBP5     | ENSG0000009606 | protein_coding       | 13.0336 | 7.5787  | 1.72  | 0.78  | 2.70E-07 | up   |
| GALNT10   | ENSG0000016457 | protein_coding;no    | 1.2886  | 0.5053  | 2.55  | 1.35  | 2.81E-07 | up   |
| JAML      | ENSG0000016059 | nonsense_mediate     | 8.1448  | 4.3281  | 1.88  | 0.91  | 2.81E-07 | up   |
| TNFAIP6   | ENSG0000012361 | protein_coding;ret   | 5.3122  | 1.8734  | 2.84  | 1.50  | 3.05E-07 | up   |
| TMEM263   | ENSG0000015113 | protein_coding;proc  | 1.4000  | 0.3975  | 3.52  | 1.82  | 3.05E-07 | up   |
| CAPN2     | ENSG0000016290 | processed_transcri   | 0.8139  | 1.9643  | 0.41  | -1.27 | 3.25E-07 | down |
| NTRK1     | ENSG0000019840 | protein_coding;proc  | 0.5460  | 0.0857  | 6.37  | 2.67  | 3.46E-07 | up   |
| GAL       | ENSG0000006948 | protein_coding;proc  | 31.2365 | 14.4034 | 2.17  | 1.12  | 3.59E-07 | up   |
| UAP1L1    | ENSG0000019735 | protein_coding;ret   | 0.2815  | 0.9039  | 0.31  | -1.68 | 3.88E-07 | down |
| AL591806  | ENSG0000027014 | nonsense_mediate     | 1.3231  | 0.0274  | 48.37 | 5.60  | 3.91E-07 | up   |
| ITPR3     | ENSG0000009643 | protein_coding       | 0.1096  | 0.0093  | 11.77 | 3.56  | 4.39E-07 | up   |
| CDKN2B    | ENSG0000014788 | protein_coding;ret   | 1.5183  | 0.4216  | 3.60  | 1.85  | 4.87E-07 | up   |
| MLF1      | ENSG0000017805 | protein_coding;no    | 1.3922  | 0.4429  | 3.14  | 1.65  | 5.57E-07 | up   |
| FUCA1     | ENSG0000017916 | protein_coding       | 34.2490 | 19.6391 | 1.74  | 0.80  | 5.60E-07 | up   |
| STK33     | ENSG0000013041 | processed_transcri   | 1.7303  | 0.6600  | 2.62  | 1.39  | 5.70E-07 | up   |
| NLRP3     | ENSG0000016271 | protein_coding;no    | 2.4122  | 5.2341  | 0.46  | -1.12 | 5.86E-07 | down |
| CDRT4     | ENSG0000023970 | protein_coding;proc  | 0.0819  | 1.5321  | 0.05  | -4.23 | 6.06E-07 | down |
| RTN2      | ENSG0000012574 | protein_coding;no    | 0.1429  | 0.6570  | 0.22  | -2.20 | 6.24E-07 | down |
| TSPOAP1   | ENSG0000000537 | protein_coding;ret   | 0.9502  | 2.1561  | 0.44  | -1.18 | 6.33E-07 | down |
| GIMAP5    | ENSG0000019632 | protein_coding;ret   | 0.1216  | 0.4996  | 0.24  | -2.04 | 6.43E-07 | down |
| IL1R2     | ENSG0000011559 | protein_coding;proc  | 0.9671  | 0.2323  | 4.16  | 2.06  | 6.49E-07 | up   |
| TRIQK     | ENSG0000020513 | protein_coding;proc  | 4.3525  | 8.0072  | 0.54  | -0.88 | 6.54E-07 | down |
| CRAT      | ENSG0000009532 | protein_coding;proc  | 0.1099  | 0.4985  | 0.22  | -2.18 | 6.73E-07 | down |
| FERMT1    | ENSG0000010131 | protein_coding;proc  | 0.5514  | 0.1210  | 4.56  | 2.19  | 6.87E-07 | up   |
| OAF       | ENSG0000018423 | protein_coding;proc  | 0.7465  | 2.1410  | 0.35  | -1.52 | 6.87E-07 | down |
| CD99      | ENSG0000000258 | protein_coding;ret   | 8.0377  | 3.9921  | 2.01  | 1.01  | 6.92E-07 | up   |
| ALDH1L2   | ENSG0000013601 | retained_intron;proc | 0.8922  | 2.2457  | 0.40  | -1.33 | 7.77E-07 | down |
| GSG1      | ENSG0000011130 | protein_coding       | 0.3513  | 1.2362  | 0.28  | -1.82 | 7.95E-07 | down |
| GRPEL2    | ENSG0000016428 | protein_coding;proc  | 1.9601  | 8.1751  | 0.24  | -2.06 | 8.02E-07 | down |
| IGFBP7    | ENSG0000016345 | protein_coding;proc  | 36.6357 | 16.4779 | 2.22  | 1.15  | 8.44E-07 | up   |
| HIST2H2BE | ENSG0000018467 | protein_coding       | 3.3057  | 1.1251  | 2.94  | 1.55  | 8.46E-07 | up   |
| FAM50B    | ENSG0000014594 | protein_coding       | 3.3614  | 1.1742  | 2.86  | 1.52  | 1.03E-06 | up   |
| AC138392  | ENSG0000021920 | processed_pseudo     | 3.3312  | 9.1863  | 0.36  | -1.46 | 1.05E-06 | down |
| FCGR1A    | ENSG0000015033 | protein_coding;proc  | 13.8716 | 23.6317 | 0.59  | -0.77 | 1.11E-06 | down |
| PROSER1   | ENSG0000012068 | protein_coding;ret   | 4.6682  | 10.5099 | 0.44  | -1.17 | 1.13E-06 | down |
| SNHG1     | ENSG0000025571 | lincRNA;retained     | 21.3909 | 37.7086 | 0.57  | -0.82 | 1.15E-06 | down |
| MSH5-SAP  | ENSG0000025515 | nonsense_mediate     | 0.9625  | 2.6189  | 0.37  | -1.44 | 1.18E-06 | down |
| OR2A9P    | ENSG0000022896 | transcribed_unpro    | 0.3573  | 0.0661  | 5.41  | 2.43  | 1.36E-06 | up   |
| EIF3M     | ENSG0000014910 | protein_coding;ret   | 24.3394 | 40.4194 | 0.60  | -0.73 | 1.40E-06 | down |

|           |                |                     |          |          |      |       |          |      |
|-----------|----------------|---------------------|----------|----------|------|-------|----------|------|
| APOL6     | ENSG0000022196 | protein_coding      | 0.5532   | 1.3878   | 0.40 | -1.33 | 1.41E-06 | down |
| HHLA2     | ENSG0000011445 | protein_coding      | 0.4323   | 1.3568   | 0.32 | -1.65 | 1.46E-06 | down |
| DDIT4     | ENSG0000016820 | protein_coding;ret  | 20.1515  | 34.5156  | 0.58 | -0.78 | 1.48E-06 | down |
| GPAT3     | ENSG0000013867 | protein_coding;pro  | 1.3264   | 0.4200   | 3.16 | 1.66  | 1.53E-06 | up   |
| MARCKSL1  | ENSG0000017513 | protein_coding      | 20.0365  | 9.2845   | 2.16 | 1.11  | 1.58E-06 | up   |
| AL121594  | ENSG0000025879 | nonsense_mediate    | 4.8125   | 18.1261  | 0.27 | -1.91 | 1.59E-06 | down |
| HLA-A     | ENSG0000020650 | retained_intron;pro | 20.3606  | 11.4043  | 1.79 | 0.84  | 1.66E-06 | up   |
| PTPRCAP   | ENSG0000021340 | protein_coding      | 57.4872  | 30.1055  | 1.91 | 0.93  | 1.67E-06 | up   |
| CYP4F3    | ENSG0000018652 | protein_coding;ret  | 7.2261   | 3.8420   | 1.88 | 0.91  | 1.70E-06 | up   |
| ARHGAP21  | ENSG0000010786 | protein_coding;ret  | 0.1978   | 0.0391   | 5.06 | 2.34  | 1.78E-06 | up   |
| PRTN3     | ENSG0000019641 | protein_coding      | 762.9220 | 397.8789 | 1.92 | 0.94  | 1.83E-06 | up   |
| HMGCS1    | ENSG0000011297 | protein_coding;ret  | 18.8306  | 10.6853  | 1.76 | 0.82  | 1.84E-06 | up   |
| PIK3R6    | ENSG0000027623 | nonsense_mediate    | 1.3758   | 0.4522   | 3.04 | 1.61  | 1.85E-06 | up   |
| OTULINL   | ENSG0000014556 | protein_coding;pro  | 1.9387   | 3.9909   | 0.49 | -1.04 | 1.95E-06 | down |
| LINC01578 | ENSG0000027288 | retained_intron;lin | 2.6560   | 5.5301   | 0.48 | -1.06 | 1.96E-06 | down |
| ARHGAP5   | ENSG0000010085 | protein_coding;ret  | 0.0910   | 0.0165   | 5.52 | 2.46  | 2.03E-06 | up   |
| MGAT3     | ENSG0000012826 | protein_coding      | 1.2729   | 0.4579   | 2.78 | 1.47  | 2.04E-06 | up   |
| LUC7L2    | ENSG0000014696 | retained_intron;pro | 20.4120  | 33.5225  | 0.61 | -0.72 | 2.05E-06 | down |
| ADGRE3    | ENSG0000013135 | protein_coding      | 4.0867   | 1.6708   | 2.45 | 1.29  | 2.12E-06 | up   |
| FZD6      | ENSG0000016493 | protein_coding;no   | 1.4985   | 0.4706   | 3.18 | 1.67  | 2.20E-06 | up   |
| CALR      | ENSG0000017921 | protein_coding;ret  | 861.9144 | 473.2142 | 1.82 | 0.87  | 2.22E-06 | up   |
| TRAC      | ENSG0000027773 | TR_C_gene           | 2.4020   | 6.6499   | 0.36 | -1.47 | 2.35E-06 | down |
| RSL24D1   | ENSG0000013787 | protein_coding;no   | 48.0254  | 80.4591  | 0.60 | -0.74 | 2.36E-06 | down |
| PPP1R16B  | ENSG0000010144 | protein_coding;pro  | 0.0510   | 0.2521   | 0.20 | -2.30 | 2.54E-06 | down |
| MT1X      | ENSG0000018719 | protein_coding;ret  | 10.4508  | 4.6607   | 2.24 | 1.16  | 2.74E-06 | up   |
| SIGLEC15  | ENSG0000019704 | retained_intron;pro | 0.2720   | 0.0442   | 6.15 | 2.62  | 2.83E-06 | up   |
| CD1D      | ENSG0000015847 | protein_coding      | 0.3762   | 1.3980   | 0.27 | -1.89 | 2.87E-06 | down |
| OXER1     | ENSG0000016288 | protein_coding      | 0.7177   | 0.1330   | 5.40 | 2.43  | 2.88E-06 | up   |
| GJB2      | ENSG0000016547 | protein_coding      | 4.1650   | 1.6881   | 2.47 | 1.30  | 2.92E-06 | up   |
| GRIK5     | ENSG0000010573 | nonsense_mediate    | 0.3084   | 0.0634   | 4.86 | 2.28  | 2.92E-06 | up   |
| TMEM106C  | ENSG0000013429 | protein_coding;ret  | 33.9286  | 16.6154  | 2.04 | 1.03  | 3.10E-06 | up   |
| SERPINA1  | ENSG0000019724 | protein_coding;ret  | 7.1365   | 3.4187   | 2.09 | 1.06  | 3.10E-06 | up   |
| DYNC2H1   | ENSG0000018724 | protein_coding;no   | 0.5217   | 0.1702   | 3.06 | 1.62  | 3.18E-06 | up   |
| RPS6KA2   | ENSG0000007124 | protein_coding;pro  | 0.0267   | 0.1249   | 0.21 | -2.23 | 3.30E-06 | down |
| AC010547  | ENSG0000026161 | nonsense_mediate    | 0.0219   | 1.3779   | 0.02 | -5.98 | 3.34E-06 | down |
| MIPOL1    | ENSG0000015133 | protein_coding;pro  | 0.0422   | 0.0049   | 8.53 | 3.09  | 3.38E-06 | up   |
| ZFAS1     | ENSG0000017741 | antisense           | 35.7446  | 65.1151  | 0.55 | -0.87 | 3.44E-06 | down |
| ZFP92     | ENSG0000018942 | protein_coding      | 0.4925   | 1.2886   | 0.38 | -1.39 | 3.48E-06 | down |
| BPI       | ENSG0000010142 | protein_coding;no   | 227.2579 | 136.9834 | 1.66 | 0.73  | 3.64E-06 | up   |
| MMP25     | ENSG0000000851 | protein_coding;ret  | 2.5402   | 1.0417   | 2.44 | 1.29  | 3.68E-06 | up   |
| TCEAL4    | ENSG0000013314 | protein_coding;ret  | 1.0258   | 0.2344   | 4.38 | 2.13  | 3.69E-06 | up   |
| RALGPS2   | ENSG0000011619 | protein_coding;ret  | 0.4668   | 0.1464   | 3.19 | 1.67  | 3.80E-06 | up   |
| SLC7A2    | ENSG0000000398 | protein_coding      | 1.3626   | 5.0082   | 0.27 | -1.88 | 3.95E-06 | down |
| NRP1      | ENSG0000009925 | protein_coding      | 1.7000   | 0.7960   | 2.14 | 1.09  | 3.96E-06 | up   |
| SLC45A3   | ENSG0000015871 | protein_coding;pro  | 1.0639   | 0.3289   | 3.23 | 1.69  | 4.12E-06 | up   |
| ARSB      | ENSG0000011327 | protein_coding;pro  | 5.4241   | 3.0343   | 1.79 | 0.84  | 4.18E-06 | up   |
| NCF2      | ENSG0000011670 | protein_coding;pro  | 29.0468  | 17.3009  | 1.68 | 0.75  | 4.21E-06 | up   |
| FMNL3     | ENSG0000016179 | protein_coding;ret  | 0.3467   | 0.8288   | 0.42 | -1.26 | 4.31E-06 | down |

|           |                |                      |          |         |       |       |          |      |
|-----------|----------------|----------------------|----------|---------|-------|-------|----------|------|
| NTSR1     | ENSG0000010118 | protein_coding;proc  | 0.2657   | 0.9138  | 0.29  | -1.78 | 4.39E-06 | down |
| TRAM1     | ENSG0000006716 | protein_coding;proc  | 28.1950  | 45.7077 | 0.62  | -0.70 | 4.46E-06 | down |
| NFE2      | ENSG0000012340 | protein_coding       | 18.9219  | 9.0485  | 2.09  | 1.06  | 4.84E-06 | up   |
| COLEC12   | ENSG0000015827 | protein_coding;proc  | 0.4256   | 0.1241  | 3.43  | 1.78  | 4.96E-06 | up   |
| ATF1      | ENSG0000012326 | protein_coding;no    | 10.7535  | 18.4457 | 0.58  | -0.78 | 5.01E-06 | down |
| IL1RL1    | ENSG0000011560 | protein_coding;no    | 0.9383   | 0.3170  | 2.96  | 1.57  | 5.04E-06 | up   |
| AZU1      | ENSG0000017223 | protein_coding       | 160.9422 | 98.4149 | 1.64  | 0.71  | 5.32E-06 | up   |
| DYSF      | ENSG0000013563 | protein_coding;proc  | 3.2508   | 1.6267  | 2.00  | 1.00  | 5.44E-06 | up   |
| AP1S3     | ENSG0000015205 | protein_coding;no    | 0.1025   | 0.3914  | 0.26  | -1.93 | 5.49E-06 | down |
| HMMR      | ENSG0000007257 | protein_coding;ret   | 7.9633   | 14.0559 | 0.57  | -0.82 | 5.54E-06 | down |
| LRPAP1    | ENSG0000016395 | nonsense_mediate     | 20.7956  | 12.7713 | 1.63  | 0.70  | 5.74E-06 | up   |
| CREG1     | ENSG0000014316 | protein_coding       | 44.4366  | 71.0800 | 0.63  | -0.68 | 5.85E-06 | down |
| SF3B3     | ENSG0000018909 | protein_coding;ret   | 10.9901  | 17.7517 | 0.62  | -0.69 | 6.05E-06 | down |
| CDC14B    | ENSG0000008137 | protein_coding;no    | 0.0107   | 0.1226  | 0.09  | -3.51 | 6.21E-06 | down |
| TMEM170A  | ENSG0000016682 | protein_coding;no    | 2.8088   | 5.6438  | 0.50  | -1.01 | 6.45E-06 | down |
| TPSB2     | ENSG0000019725 | protein_coding;no    | 1.1879   | 0.1107  | 10.73 | 3.42  | 6.57E-06 | up   |
| AL118508  | ENSG0000027916 | TEC                  | 0.1837   | 0.7644  | 0.24  | -2.06 | 6.72E-06 | down |
| GATA1     | ENSG0000010214 | protein_coding       | 3.6224   | 1.2204  | 2.97  | 1.57  | 6.84E-06 | up   |
| RAB11A    | ENSG0000010376 | protein_coding;proc  | 7.5647   | 12.3036 | 0.61  | -0.70 | 6.99E-06 | down |
| PRICKLE1  | ENSG0000013917 | retained_intron;proc | 0.2580   | 0.6967  | 0.37  | -1.43 | 7.26E-06 | down |
| ARHGEF12  | ENSG0000019691 | protein_coding;ret   | 0.0324   | 0.1155  | 0.28  | -1.83 | 7.40E-06 | down |
| RFX3      | ENSG0000008029 | protein_coding       | 0.4471   | 1.0859  | 0.41  | -1.28 | 7.40E-06 | down |
| ZNF24     | ENSG0000017246 | protein_coding       | 4.1714   | 17.1828 | 0.24  | -2.04 | 7.45E-06 | down |
| QPRT      | ENSG0000010348 | protein_coding;ret   | 12.4391  | 7.1872  | 1.73  | 0.79  | 7.61E-06 | up   |
| RPS10-NUD | ENSG0000027080 | protein_coding       | 0.1939   | 4.8506  | 0.04  | -4.64 | 7.65E-06 | down |
| FN1       | ENSG0000011541 | protein_coding;ret   | 0.2861   | 0.1020  | 2.80  | 1.49  | 8.43E-06 | up   |
| EHBPI1L1  | ENSG0000017344 | protein_coding;ret   | 5.8692   | 3.2684  | 1.80  | 0.84  | 8.68E-06 | up   |
| FAM72C    | ENSG0000026351 | protein_coding       | 6.5364   | 13.3603 | 0.49  | -1.03 | 8.77E-06 | down |
| ICAM1     | ENSG0000009033 | protein_coding;proc  | 2.3696   | 0.8696  | 2.72  | 1.45  | 9.19E-06 | up   |
| ANKRD49   | ENSG0000016887 | protein_coding;proc  | 3.9838   | 10.3209 | 0.39  | -1.37 | 9.90E-06 | down |
| MMP9      | ENSG0000010098 | protein_coding       | 1.6535   | 0.5673  | 2.91  | 1.54  | 1.00E-05 | up   |
| MT1E      | ENSG0000016971 | protein_coding       | 7.5729   | 3.0136  | 2.51  | 1.33  | 1.03E-05 | up   |
| TBC1D23   | ENSG0000003605 | protein_coding;proc  | 5.4883   | 9.2528  | 0.59  | -0.75 | 1.06E-05 | down |
| ENDOD1    | ENSG0000014921 | protein_coding       | 0.6623   | 1.8003  | 0.37  | -1.44 | 1.06E-05 | down |
| PCYOX1    | ENSG0000011600 | protein_coding;ret   | 5.2295   | 2.7016  | 1.94  | 0.95  | 1.09E-05 | up   |
| EHHADH    | ENSG0000011379 | protein_coding;proc  | 0.4861   | 0.1269  | 3.83  | 1.94  | 1.12E-05 | up   |
| ZNF727    | ENSG0000021465 | protein_coding       | 0.1915   | 0.0210  | 9.11  | 3.19  | 1.12E-05 | up   |
| DENND4A   | ENSG0000017448 | protein_coding;ret   | 2.7454   | 4.6824  | 0.59  | -0.77 | 1.17E-05 | down |
| MPEG1     | ENSG0000019762 | protein_coding       | 6.0254   | 3.0871  | 1.95  | 0.96  | 1.25E-05 | up   |
| AC019205  | ENSG0000022985 | antisense            | 0.3751   | 0.0888  | 4.22  | 2.08  | 1.27E-05 | up   |
| AGPAT1    | ENSG0000020431 | protein_coding;proc  | 11.4085  | 6.3678  | 1.79  | 0.84  | 1.29E-05 | up   |
| ECI2      | ENSG0000019872 | retained_intron;proc | 0.4766   | 1.2165  | 0.39  | -1.35 | 1.32E-05 | down |
| POLR2A    | ENSG0000018122 | protein_coding;proc  | 5.3817   | 3.0259  | 1.78  | 0.83  | 1.35E-05 | up   |
| AP002990  | ENSG0000025550 | nonsense_mediate     | 297.0574 | 6.8659  | 43.27 | 5.44  | 1.37E-05 | up   |
| PYCR1     | ENSG0000018301 | protein_coding       | 11.4788  | 19.1665 | 0.60  | -0.74 | 1.37E-05 | down |
| TAF1D     | ENSG0000016601 | nonsense_mediate     | 8.2558   | 12.9373 | 0.64  | -0.65 | 1.77E-05 | down |
| COL15A1   | ENSG0000020429 | protein_coding;ret   | 0.0558   | 0.2326  | 0.24  | -2.06 | 1.87E-05 | down |
| RNMT      | ENSG0000010165 | protein_coding;no    | 4.3176   | 12.3647 | 0.35  | -1.52 | 1.93E-05 | down |

|           |                |                     |          |          |      |       |          |      |
|-----------|----------------|---------------------|----------|----------|------|-------|----------|------|
| PPIL3     | ENSG0000024034 | protein_coding;ret  | 5.6867   | 10.5200  | 0.54 | -0.89 | 2.06E-05 | down |
| LANCL3    | ENSG0000014703 | protein_coding      | 0.3127   | 0.1023   | 3.06 | 1.61  | 2.12E-05 | up   |
| CD63      | ENSG0000013540 | protein_coding;ret  | 130.8291 | 81.6078  | 1.60 | 0.68  | 2.13E-05 | up   |
| ZFP62     | ENSG0000019667 | protein_coding;pro  | 3.4130   | 1.4385   | 2.37 | 1.25  | 2.13E-05 | up   |
| CRISPLD2  | ENSG0000010319 | protein_coding;ret  | 0.7796   | 0.2501   | 3.12 | 1.64  | 2.16E-05 | up   |
| ADAM8     | ENSG0000015165 | retained_intron;pro | 3.5558   | 1.7317   | 2.05 | 1.04  | 2.29E-05 | up   |
| DNAJC25-G | ENSG0000024411 | protein_coding      | 1.1569   | 5.3800   | 0.22 | -2.22 | 2.30E-05 | down |
| SNHG5     | ENSG0000020387 | lincRNA;retained_   | 8.3660   | 14.1987  | 0.59 | -0.76 | 2.33E-05 | down |
| BORA      | ENSG0000013612 | protein_coding;no   | 6.5539   | 11.9192  | 0.55 | -0.86 | 2.41E-05 | down |
| CGAS      | ENSG0000016443 | protein_coding;ret  | 3.9348   | 7.1514   | 0.55 | -0.86 | 2.47E-05 | down |
| NOMO2     | ENSG0000018516 | protein_coding;no   | 25.2645  | 16.0397  | 1.58 | 0.66  | 2.51E-05 | up   |
| ATF5      | ENSG0000016913 | protein_coding      | 44.2602  | 72.9618  | 0.61 | -0.72 | 2.54E-05 | down |
| GNLY      | ENSG0000011552 | protein_coding;ret  | 0.6561   | 0.1762   | 3.72 | 1.90  | 2.69E-05 | up   |
| DDX21     | ENSG0000016573 | protein_coding      | 55.0784  | 85.8132  | 0.64 | -0.64 | 2.79E-05 | down |
| EHD1      | ENSG0000011004 | retained_intron;pro | 2.4657   | 4.5623   | 0.54 | -0.89 | 2.81E-05 | down |
| PHACTR3   | ENSG0000008749 | protein_coding;ret  | 1.2418   | 2.5129   | 0.49 | -1.02 | 2.85E-05 | down |
| ETS1      | ENSG0000013495 | protein_coding;ret  | 0.2232   | 0.5962   | 0.37 | -1.42 | 2.87E-05 | down |
| SMG1P7    | ENSG0000026155 | processed_transcri  | 0.8766   | 2.0900   | 0.42 | -1.25 | 2.93E-05 | down |
| TUBE1     | ENSG0000007493 | nonsense_mediate    | 3.0732   | 5.3782   | 0.57 | -0.81 | 2.93E-05 | down |
| CKAP4     | ENSG0000013602 | protein_coding;pro  | 2.8817   | 1.3021   | 2.21 | 1.15  | 3.10E-05 | up   |
| PRAF2     | ENSG0000024327 | protein_coding;pro  | 4.0823   | 1.4714   | 2.77 | 1.47  | 3.13E-05 | up   |
| AC087190  | ENSG0000026324 | 3prime_overlappir   | 0.5113   | 3.0261   | 0.17 | -2.57 | 3.17E-05 | down |
| RIPOR2    | ENSG0000011191 | protein_coding;pro  | 0.4481   | 0.1648   | 2.72 | 1.44  | 3.38E-05 | up   |
| C18orf32  | ENSG0000017757 | protein_coding      | 6.8909   | 2.6108   | 2.64 | 1.40  | 3.49E-05 | up   |
| TDRKH     | ENSG0000018213 | protein_coding;no   | 0.5561   | 0.1735   | 3.21 | 1.68  | 3.50E-05 | up   |
| BABAM2    | ENSG0000015801 | protein_coding;pro  | 9.5936   | 16.2785  | 0.59 | -0.76 | 3.61E-05 | down |
| RPN2      | ENSG0000011870 | protein_coding;pro  | 221.8932 | 142.7608 | 1.55 | 0.64  | 3.76E-05 | up   |
| MTLN      | ENSG0000017570 | protein_coding      | 2.3293   | 5.2459   | 0.44 | -1.17 | 3.85E-05 | down |
| AC023024  | ENSG0000025917 | antisense           | 0.0066   | 0.2459   | 0.03 | -5.23 | 3.89E-05 | down |
| S100A12   | ENSG0000016322 | protein_coding      | 50.8410  | 25.4337  | 2.00 | 1.00  | 3.99E-05 | up   |
| P2RX7     | ENSG0000008904 | protein_coding;no   | 0.3300   | 0.9592   | 0.34 | -1.54 | 4.08E-05 | down |
| P2RY6     | ENSG0000017163 | protein_coding      | 1.2519   | 0.4873   | 2.57 | 1.36  | 4.22E-05 | up   |
| VILL      | ENSG0000013605 | protein_coding;ret  | 1.2395   | 2.4390   | 0.51 | -0.98 | 4.25E-05 | down |
| AC159540  | ENSG0000027770 | lincRNA             | 3.5389   | 1.4662   | 2.41 | 1.27  | 4.30E-05 | up   |
| CHAC1     | ENSG0000012896 | protein_coding      | 2.2608   | 5.1391   | 0.44 | -1.18 | 4.36E-05 | down |
| ZNF354C   | ENSG0000017793 | protein_coding      | 0.7935   | 0.2810   | 2.82 | 1.50  | 4.37E-05 | up   |
| ATP5MD    | ENSG0000017391 | protein_coding      | 62.0833  | 95.9012  | 0.65 | -0.63 | 4.40E-05 | down |
| PLEKHO1   | ENSG0000002390 | protein_coding;ret  | 4.5244   | 2.4656   | 1.84 | 0.88  | 4.55E-05 | up   |
| TMEM9     | ENSG0000011685 | protein_coding;pro  | 0.3328   | 0.9357   | 0.36 | -1.49 | 4.87E-05 | down |
| TDRD7     | ENSG0000019611 | protein_coding;pro  | 11.5865  | 17.8371  | 0.65 | -0.62 | 5.02E-05 | down |
| SRP14     | ENSG0000014031 | protein_coding;pro  | 27.0449  | 41.7582  | 0.65 | -0.63 | 5.07E-05 | down |
| ADAM22    | ENSG0000000827 | protein_coding;pro  | 0.2332   | 0.0770   | 3.03 | 1.60  | 5.20E-05 | up   |
| SDHA      | ENSG0000007357 | retained_intron;pro | 11.2200  | 7.2873   | 1.54 | 0.62  | 5.42E-05 | up   |
| CCNA1     | ENSG0000013310 | protein_coding      | 5.8362   | 10.8473  | 0.54 | -0.89 | 5.51E-05 | down |
| DDX60     | ENSG0000013762 | protein_coding;pro  | 0.0414   | 0.1709   | 0.24 | -2.05 | 5.57E-05 | down |
| LINC00900 | ENSG0000024610 | lincRNA             | 0.0421   | 0.2205   | 0.19 | -2.39 | 5.70E-05 | down |
| WNT10B    | ENSG0000016988 | protein_coding;ret  | 0.1284   | 0.4583   | 0.28 | -1.84 | 5.71E-05 | down |
| PAFAH1B2  | ENSG0000016809 | protein_coding;pro  | 6.6603   | 10.3068  | 0.65 | -0.63 | 5.75E-05 | down |

|           |                |                     |          |          |      |       |          |      |
|-----------|----------------|---------------------|----------|----------|------|-------|----------|------|
| ITM2C     | ENSG0000013591 | protein_coding;pro  | 35.1328  | 22.1861  | 1.58 | 0.66  | 5.78E-05 | up   |
| PLXNC1    | ENSG0000013604 | protein_coding;ret  | 3.2650   | 1.8518   | 1.76 | 0.82  | 5.85E-05 | up   |
| AC069288  | ENSG0000028619 | nonsense_mediate    | 0.1128   | 2.3522   | 0.05 | -4.38 | 5.98E-05 | down |
| SIGLEC6   | ENSG0000010549 | protein_coding;ret  | 3.1726   | 6.0444   | 0.52 | -0.93 | 6.13E-05 | down |
| DENND6B   | ENSG0000020559 | protein_coding;ret  | 0.1733   | 0.5128   | 0.34 | -1.56 | 6.24E-05 | down |
| NIP7      | ENSG0000013260 | retained_intron;pro | 11.3231  | 17.2407  | 0.66 | -0.61 | 6.26E-05 | down |
| AL590764  | ENSG0000028517 | nonsense_mediate    | 0.5650   | 0.0582   | 9.70 | 3.28  | 6.31E-05 | up   |
| GOLGA8R   | ENSG0000018639 | protein_coding;TE   | 0.3835   | 1.0571   | 0.36 | -1.46 | 6.37E-05 | down |
| ASF1A     | ENSG0000011187 | protein_coding;ret  | 20.4986  | 32.0578  | 0.64 | -0.65 | 6.46E-05 | down |
| HEXIM1    | ENSG0000018683 | protein_coding      | 13.6716  | 8.4321   | 1.62 | 0.70  | 6.54E-05 | up   |
| MYO1E     | ENSG0000015748 | protein_coding;pro  | 0.0557   | 0.2041   | 0.27 | -1.87 | 6.55E-05 | down |
| SMOX      | ENSG0000008882 | protein_coding;pro  | 1.8255   | 3.9028   | 0.47 | -1.10 | 6.63E-05 | down |
| ZFR       | ENSG0000005609 | nonsense_mediate    | 17.1396  | 26.2921  | 0.65 | -0.62 | 6.72E-05 | down |
| FBXO10    | ENSG0000014791 | protein_coding;no   | 0.4914   | 1.1228   | 0.44 | -1.19 | 6.76E-05 | down |
| ITGB7     | ENSG0000013962 | protein_coding;ret  | 3.2419   | 1.5931   | 2.03 | 1.03  | 6.84E-05 | up   |
| ADM2      | ENSG0000012816 | protein_coding      | 0.0539   | 0.2243   | 0.24 | -2.06 | 7.14E-05 | down |
| CX3CR1    | ENSG0000016832 | protein_coding      | 0.0527   | 0.2320   | 0.23 | -2.14 | 7.46E-05 | down |
| AL365181  | ENSG0000027240 | antisense           | 0.9510   | 2.2705   | 0.42 | -1.26 | 7.59E-05 | down |
| BCL6      | ENSG0000011391 | protein_coding;no   | 4.1986   | 2.2720   | 1.85 | 0.89  | 7.61E-05 | up   |
| SEPT7-AS1 | ENSG0000022887 | lincRNA             | 0.1615   | 0.5545   | 0.29 | -1.78 | 7.69E-05 | down |
| ACSF2     | ENSG0000016710 | processed_transcri  | 0.0725   | 0.2442   | 0.30 | -1.75 | 7.69E-05 | down |
| ZC3H12C   | ENSG0000014928 | protein_coding      | 0.0410   | 0.1803   | 0.23 | -2.14 | 7.71E-05 | down |
| COMT      | ENSG0000009301 | nonsense_mediate    | 9.5362   | 15.8965  | 0.60 | -0.74 | 7.72E-05 | down |
| CHI3L1    | ENSG0000013304 | protein_coding;ret  | 197.7928 | 128.3398 | 1.54 | 0.62  | 7.98E-05 | up   |
| SRPX      | ENSG0000010195 | protein_coding;pro  | 4.9108   | 2.2334   | 2.20 | 1.14  | 7.99E-05 | up   |
| FAM72D    | ENSG0000021578 | protein_coding      | 6.7268   | 12.3137  | 0.55 | -0.87 | 8.05E-05 | down |
| ZPR1      | ENSG0000010991 | protein_coding;no   | 6.9960   | 10.8369  | 0.65 | -0.63 | 8.09E-05 | down |
| HK1       | ENSG0000015651 | protein_coding;pro  | 5.7568   | 3.3569   | 1.71 | 0.78  | 8.10E-05 | up   |
| POLR2L    | ENSG0000017770 | protein_coding;no   | 50.6239  | 31.0454  | 1.63 | 0.71  | 8.25E-05 | up   |
| GANC      | ENSG0000021401 | retained_intron;no  | 2.5726   | 4.1052   | 0.63 | -0.67 | 8.26E-05 | down |
| RTCA      | ENSG0000013799 | protein_coding;pro  | 12.2514  | 19.3011  | 0.63 | -0.66 | 8.62E-05 | down |
| ADAM1A    | ENSG0000022918 | unitary_pseudoger   | 2.3073   | 0.2800   | 8.24 | 3.04  | 8.81E-05 | up   |
| CCL3      | ENSG0000027763 | protein_coding;ret  | 0.2706   | 1.1769   | 0.23 | -2.12 | 8.87E-05 | down |
| ZC2HC1A   | ENSG0000010442 | protein_coding;pro  | 0.9730   | 0.3634   | 2.68 | 1.42  | 9.03E-05 | up   |
| DOCK10    | ENSG0000013590 | protein_coding;no   | 2.2114   | 3.6391   | 0.61 | -0.72 | 9.06E-05 | down |
| DES11     | ENSG0000010041 | processed_transcri  | 11.5104  | 17.4951  | 0.66 | -0.60 | 9.49E-05 | down |
| CCNE2     | ENSG0000017530 | protein_coding;ret  | 6.5090   | 3.6273   | 1.79 | 0.84  | 1.02E-04 | up   |
| GPR18     | ENSG0000012524 | protein_coding      | 0.9670   | 2.4607   | 0.39 | -1.35 | 1.03E-04 | down |
| CEBPE     | ENSG0000009206 | protein_coding      | 164.0261 | 107.7185 | 1.52 | 0.61  | 1.03E-04 | up   |
| GANAB     | ENSG0000008959 | protein_coding;pro  | 76.2695  | 50.2409  | 1.52 | 0.60  | 1.05E-04 | up   |
| PDIA5     | ENSG0000006548 | protein_coding;pro  | 13.7907  | 8.5789   | 1.61 | 0.68  | 1.06E-04 | up   |
| UBE2Q2    | ENSG0000014036 | protein_coding;no   | 7.2002   | 11.3750  | 0.63 | -0.66 | 1.07E-04 | down |
| LINC01341 | ENSG0000022795 | lincRNA;retained_   | 0.6161   | 0.1900   | 3.24 | 1.70  | 1.09E-04 | up   |
| TNNI2     | ENSG0000013059 | retained_intron;pro | 6.6714   | 2.8451   | 2.34 | 1.23  | 1.11E-04 | up   |
| CCDC59    | ENSG0000013377 | protein_coding;pro  | 10.9180  | 17.1639  | 0.64 | -0.65 | 1.13E-04 | down |
| GIMAP2    | ENSG0000010656 | protein_coding;ret  | 9.7436   | 17.2741  | 0.56 | -0.83 | 1.14E-04 | down |
| BMPR1A    | ENSG0000010777 | protein_coding;no   | 0.1884   | 0.4649   | 0.41 | -1.30 | 1.18E-04 | down |
| ARHGEF3   | ENSG0000016394 | protein_coding;pro  | 0.0502   | 0.1809   | 0.28 | -1.85 | 1.22E-04 | down |



|           |                |                     |           |           |       |       |          |      |
|-----------|----------------|---------------------|-----------|-----------|-------|-------|----------|------|
| CDA       | ENSG0000015882 | protein_coding;prc  | 38.9636   | 21.8770   | 1.78  | 0.83  | 1.28E-04 | up   |
| COQ2      | ENSG0000017308 | protein_coding;no   | 6.6337    | 11.7607   | 0.56  | -0.83 | 1.30E-04 | down |
| AKR1C3    | ENSG0000019613 | protein_coding;ret  | 1.0163    | 0.3917    | 2.59  | 1.38  | 1.31E-04 | up   |
| GXYLT1    | ENSG0000015123 | protein_coding      | 4.8488    | 2.8685    | 1.69  | 0.76  | 1.38E-04 | up   |
| REXO5     | ENSG0000000518 | protein_coding;no   | 5.6007    | 9.2592    | 0.60  | -0.73 | 1.39E-04 | down |
| IGF2BP3   | ENSG0000013623 | protein_coding;prc  | 4.6799    | 7.2370    | 0.65  | -0.63 | 1.41E-04 | down |
| ZC3H15    | ENSG0000006554 | protein_coding;ret  | 30.8048   | 47.4045   | 0.65  | -0.62 | 1.41E-04 | down |
| RFLNB     | ENSG0000018368 | protein_coding      | 23.2949   | 15.3087   | 1.52  | 0.61  | 1.44E-04 | up   |
| RNF13     | ENSG0000008299 | protein_coding;no   | 7.0592    | 3.7484    | 1.88  | 0.91  | 1.44E-04 | up   |
| EFHC1     | ENSG0000009609 | retained_intron;prc | 0.3546    | 0.6674    | 0.53  | -0.91 | 1.45E-04 | down |
| PIGT      | ENSG0000012415 | protein_coding;no   | 5.3370    | 3.3710    | 1.58  | 0.66  | 1.46E-04 | up   |
| ITPRIPL2  | ENSG0000020573 | protein_coding;prc  | 0.0501    | 0.2834    | 0.18  | -2.50 | 1.48E-04 | down |
| PRKCE     | ENSG0000017113 | protein_coding;prc  | 0.0497    | 0.1659    | 0.30  | -1.74 | 1.50E-04 | down |
| C15orf41  | ENSG0000018607 | protein_coding;prc  | 0.5242    | 1.2329    | 0.43  | -1.23 | 1.52E-04 | down |
| OLR1      | ENSG0000017339 | protein_coding;ret  | 0.4831    | 1.2629    | 0.38  | -1.39 | 1.54E-04 | down |
| CNTNAP3   | ENSG0000010671 | protein_coding;no   | 0.2287    | 0.0682    | 3.35  | 1.75  | 1.57E-04 | up   |
| CFP       | ENSG0000012675 | protein_coding;ret  | 4.5838    | 2.5730    | 1.78  | 0.83  | 1.68E-04 | up   |
| SLC9A6    | ENSG0000019868 | protein_coding;ret  | 3.5186    | 1.7293    | 2.03  | 1.02  | 1.73E-04 | up   |
| GFI1B     | ENSG0000016570 | protein_coding;prc  | 0.1702    | 0.0426    | 4.00  | 2.00  | 1.78E-04 | up   |
| FGD6      | ENSG0000018026 | protein_coding;no   | 0.1402    | 0.0437    | 3.21  | 1.68  | 1.79E-04 | up   |
| MEIOB     | ENSG0000016203 | protein_coding;no   | 0.5577    | 0.1559    | 3.58  | 1.84  | 1.80E-04 | up   |
| NOA1      | ENSG0000008409 | protein_coding      | 13.0630   | 20.7021   | 0.63  | -0.66 | 1.83E-04 | down |
| EIF2A     | ENSG0000014489 | protein_coding;ret  | 16.0757   | 25.2046   | 0.64  | -0.65 | 1.84E-04 | down |
| SPOPL     | ENSG0000014422 | protein_coding;no   | 2.7549    | 4.9609    | 0.56  | -0.85 | 1.84E-04 | down |
| ADGRB1    | ENSG0000018179 | protein_coding;ret  | 0.2813    | 0.0709    | 3.97  | 1.99  | 1.85E-04 | up   |
| ZCCHC24   | ENSG0000016542 | protein_coding      | 0.1831    | 0.5041    | 0.36  | -1.46 | 1.86E-04 | down |
| KIF1B     | ENSG0000005452 | protein_coding;ret  | 0.7750    | 0.3899    | 1.99  | 0.99  | 1.86E-04 | up   |
| SPTAN1    | ENSG0000019769 | processed_transcri  | 4.6884    | 3.0731    | 1.53  | 0.61  | 1.90E-04 | up   |
| SEMA7A    | ENSG0000013862 | protein_coding;ret  | 0.8346    | 0.3133    | 2.66  | 1.41  | 1.91E-04 | up   |
| FST       | ENSG0000013436 | protein_coding;ret  | 0.3612    | 0.0552    | 6.54  | 2.71  | 1.93E-04 | up   |
| SETDB2    | ENSG0000013616 | protein_coding;prc  | 8.6040    | 12.9192   | 0.67  | -0.59 | 1.93E-04 | down |
| C6orf120  | ENSG0000018512 | protein_coding      | 10.4628   | 16.4869   | 0.63  | -0.66 | 1.94E-04 | down |
| CD70      | ENSG0000012572 | protein_coding      | 0.1074    | 0.8578    | 0.13  | -3.00 | 1.98E-04 | down |
| RABGAP1L  | ENSG0000015206 | protein_coding;no   | 1.4787    | 2.4832    | 0.60  | -0.75 | 1.99E-04 | down |
| TP53INP1  | ENSG0000016493 | protein_coding      | 0.8122    | 0.3121    | 2.60  | 1.38  | 2.05E-04 | up   |
| DEFA3     | ENSG0000023983 | protein_coding      | 1676.8785 | 2567.6765 | 0.65  | -0.61 | 2.05E-04 | down |
| PSMG2     | ENSG0000012878 | protein_coding;ret  | 31.0620   | 45.6757   | 0.68  | -0.56 | 2.08E-04 | down |
| CTSZ      | ENSG0000010116 | protein_coding;ret  | 63.5683   | 42.6474   | 1.49  | 0.58  | 2.09E-04 | up   |
| RPL9P9    | ENSG0000023755 | processed_transcri  | 1046.2953 | 1557.7401 | 0.67  | -0.57 | 2.13E-04 | down |
| F5        | ENSG0000019873 | protein_coding;ret  | 1.2617    | 0.5980    | 2.11  | 1.08  | 2.19E-04 | up   |
| C10orf105 | ENSG0000021468 | protein_coding      | 0.2332    | 0.0137    | 17.07 | 4.09  | 2.25E-04 | up   |
| RNF157    | ENSG0000014157 | protein_coding;ret  | 1.1148    | 0.5106    | 2.18  | 1.13  | 2.27E-04 | up   |
| APMAP     | ENSG0000010147 | protein_coding      | 117.2654  | 79.7883   | 1.47  | 0.56  | 2.37E-04 | up   |
| CR2       | ENSG0000011732 | protein_coding;prc  | 0.1896    | 0.0264    | 7.18  | 2.84  | 2.38E-04 | up   |
| FCGR1CP   | ENSG0000026553 | unprocessed_pseu    | 11.9028   | 20.9800   | 0.57  | -0.82 | 2.39E-04 | down |
| ACADSB    | ENSG0000019617 | protein_coding;prc  | 4.3551    | 2.4527    | 1.78  | 0.83  | 2.44E-04 | up   |
| DHRS3     | ENSG0000016249 | protein_coding;ret  | 0.2074    | 0.6331    | 0.33  | -1.61 | 2.45E-04 | down |
| KCNAB2    | ENSG0000006942 | protein_coding;ret  | 19.3226   | 10.4221   | 1.85  | 0.89  | 2.46E-04 | up   |

|          |                |                     |          |           |      |       |          |      |
|----------|----------------|---------------------|----------|-----------|------|-------|----------|------|
| FADS1    | ENSG0000014948 | protein_coding;pro  | 11.5325  | 7.6028    | 1.52 | 0.60  | 2.47E-04 | up   |
| ADAT2    | ENSG0000018900 | protein_coding;pro  | 5.3927   | 9.6892    | 0.56 | -0.85 | 2.55E-04 | down |
| TCN1     | ENSG0000013482 | protein_coding;ret  | 3.4550   | 1.0904    | 3.17 | 1.66  | 2.57E-04 | up   |
| ZNF277   | ENSG0000019883 | nonsense_mediate    | 6.2177   | 10.5915   | 0.59 | -0.77 | 2.58E-04 | down |
| GOLGA8O  | ENSG0000020612 | protein_coding      | 2.7202   | 5.5382    | 0.49 | -1.03 | 2.59E-04 | down |
| NLRP12   | ENSG0000014240 | protein_coding;ret  | 0.5993   | 0.2342    | 2.56 | 1.36  | 2.61E-04 | up   |
| HIGD2A   | ENSG0000014606 | protein_coding      | 58.2277  | 88.1143   | 0.66 | -0.60 | 2.63E-04 | down |
| SH3BGRL3 | ENSG0000014266 | protein_coding      | 189.4811 | 127.7871  | 1.48 | 0.57  | 2.68E-04 | up   |
| STOX2    | ENSG0000017332 | protein_coding;no   | 0.3253   | 0.9005    | 0.36 | -1.47 | 2.68E-04 | down |
| CXorf21  | ENSG0000012028 | protein_coding      | 8.8543   | 14.9857   | 0.59 | -0.76 | 2.72E-04 | down |
| ABHD14A  | ENSG0000024848 | protein_coding;ret  | 6.4049   | 3.3983    | 1.88 | 0.91  | 2.79E-04 | up   |
| ETFB     | ENSG0000010537 | protein_coding;ret  | 13.1503  | 8.8313    | 1.49 | 0.57  | 2.81E-04 | up   |
| MYEF2    | ENSG0000010417 | protein_coding;ret  | 0.2061   | 0.0624    | 3.30 | 1.72  | 2.82E-04 | up   |
| S100A10  | ENSG0000019774 | protein_coding;pro  | 4.2141   | 8.7888    | 0.48 | -1.06 | 2.86E-04 | down |
| CD300A   | ENSG0000016785 | protein_coding;ret  | 12.8301  | 7.7241    | 1.66 | 0.73  | 2.88E-04 | up   |
| APOLD1   | ENSG0000017887 | nonsense_mediate    | 0.3231   | 1.7579    | 0.18 | -2.44 | 2.91E-04 | down |
| GBP3     | ENSG0000011722 | protein_coding;ret  | 0.3958   | 0.9535    | 0.42 | -1.27 | 2.92E-04 | down |
| EEF1G    | ENSG0000025477 | protein_coding;ret  | 694.9528 | 1543.5836 | 0.45 | -1.15 | 2.98E-04 | down |
| TPSAB1   | ENSG0000017223 | protein_coding;ret  | 0.5326   | 0.0564    | 9.44 | 3.24  | 2.99E-04 | up   |
| UBA7     | ENSG0000018217 | retained_intron;pro | 1.5932   | 3.0302    | 0.53 | -0.93 | 3.03E-04 | down |
| AC104452 | ENSG0000028318 | nonsense_mediate    | 1.1510   | 0.4979    | 2.31 | 1.21  | 3.06E-04 | up   |
| C6orf48  | ENSG0000020438 | lincRNA;protein_c   | 92.2129  | 136.9801  | 0.67 | -0.57 | 3.09E-04 | down |
| RBP7     | ENSG0000016244 | protein_coding;no   | 1.2526   | 0.1998    | 6.27 | 2.65  | 3.17E-04 | up   |
| DNAJA4   | ENSG0000014040 | protein_coding;ret  | 1.5914   | 0.7787    | 2.04 | 1.03  | 3.17E-04 | up   |
| ALOX5    | ENSG0000001277 | protein_coding;pro  | 13.3644  | 8.5946    | 1.55 | 0.64  | 3.18E-04 | up   |
| ASS1     | ENSG0000013070 | protein_coding;ret  | 2.3748   | 4.7630    | 0.50 | -1.00 | 3.29E-04 | down |
| GNG2     | ENSG0000018646 | protein_coding;pro  | 4.1148   | 2.3867    | 1.72 | 0.79  | 3.30E-04 | up   |
| PINK1-AS | ENSG0000011724 | antisense           | 5.9776   | 3.4702    | 1.72 | 0.78  | 3.41E-04 | up   |
| COX5A    | ENSG0000017874 | protein_coding      | 52.9833  | 76.9931   | 0.69 | -0.54 | 3.43E-04 | down |
| CLIC4    | ENSG0000016950 | protein_coding;pro  | 12.6152  | 18.8682   | 0.67 | -0.58 | 3.47E-04 | down |
| PPIB     | ENSG0000016679 | protein_coding;pro  | 149.4567 | 95.8930   | 1.56 | 0.64  | 3.47E-04 | up   |
| SNRPN    | ENSG0000012873 | protein_coding;pro  | 18.5909  | 11.6380   | 1.60 | 0.68  | 3.48E-04 | up   |
| SNHG15   | ENSG0000023295 | lincRNA             | 17.1046  | 26.9854   | 0.63 | -0.66 | 3.49E-04 | down |
| MSRB1    | ENSG0000019873 | protein_coding;pro  | 37.9372  | 25.4791   | 1.49 | 0.57  | 3.51E-04 | up   |
| ATRN     | ENSG0000008881 | protein_coding      | 11.2690  | 7.6764    | 1.47 | 0.55  | 3.53E-04 | up   |
| PLEC     | ENSG0000017820 | protein_coding;ret  | 1.5303   | 0.8627    | 1.77 | 0.83  | 3.54E-04 | up   |
| CCDC18   | ENSG0000012248 | protein_coding;ret  | 3.2333   | 5.4304    | 0.60 | -0.75 | 3.60E-04 | down |
| TNFSF13B | ENSG0000010252 | protein_coding;pro  | 5.2155   | 9.5552    | 0.55 | -0.87 | 3.64E-04 | down |
| CASC11   | ENSG0000024937 | lincRNA             | 0.2063   | 0.6222    | 0.33 | -1.59 | 3.72E-04 | down |
| S100P    | ENSG0000016399 | protein_coding;pro  | 68.4830  | 108.6239  | 0.63 | -0.67 | 3.73E-04 | down |
| FCRL2    | ENSG0000013270 | retained_intron;pro | 0.3455   | 0.1089    | 3.17 | 1.67  | 3.74E-04 | up   |
| EAF2     | ENSG0000014508 | nonsense_mediate    | 24.1901  | 35.5218   | 0.68 | -0.55 | 3.89E-04 | down |
| LCMT1    | ENSG0000020562 | nonsense_mediate    | 7.3643   | 12.0723   | 0.61 | -0.71 | 3.91E-04 | down |
| PGAM4    | ENSG0000022678 | protein_coding      | 15.2348  | 5.8593    | 2.60 | 1.38  | 3.91E-04 | up   |
| AL358473 | ENSG0000022919 | antisense           | 0.6015   | 0.1972    | 3.05 | 1.61  | 3.94E-04 | up   |
| ARHGEF35 | ENSG0000021321 | protein_coding      | 0.3916   | 0.0630    | 6.22 | 2.64  | 3.96E-04 | up   |
| FCRL1    | ENSG0000016353 | protein_coding;pro  | 1.8503   | 0.8848    | 2.09 | 1.06  | 3.97E-04 | up   |
| ACSS2    | ENSG0000013106 | protein_coding;ret  | 8.2983   | 5.4026    | 1.54 | 0.62  | 4.00E-04 | up   |

|          |                |                      |          |          |      |       |          |      |
|----------|----------------|----------------------|----------|----------|------|-------|----------|------|
| NCS1     | ENSG0000010713 | protein_coding;proc  | 0.2808   | 0.0666   | 4.22 | 2.08  | 4.00E-04 | up   |
| ARHGAP15 | ENSG0000007588 | retained_intron;proc | 11.2809  | 16.5437  | 0.68 | -0.55 | 4.03E-04 | down |
| TRIM71   | ENSG0000020655 | protein_coding       | 0.2020   | 0.0439   | 4.61 | 2.20  | 4.06E-04 | up   |
| NEB      | ENSG0000018309 | protein_coding;proc  | 0.0182   | 0.0615   | 0.30 | -1.76 | 4.07E-04 | down |
| MEGF9    | ENSG0000010678 | protein_coding       | 9.1748   | 6.1280   | 1.50 | 0.58  | 4.15E-04 | up   |
| ACAD8    | ENSG0000015149 | retained_intron;proc | 4.7792   | 2.8885   | 1.65 | 0.73  | 4.16E-04 | up   |
| FAM45A   | ENSG0000011997 | protein_coding;proc  | 3.4630   | 6.6023   | 0.52 | -0.93 | 4.18E-04 | down |
| AC034236 | ENSG0000018564 | processed_pseudo     | 46.6504  | 77.8960  | 0.60 | -0.74 | 4.23E-04 | down |
| AES      | ENSG0000010496 | retained_intron;proc | 3.8070   | 6.3187   | 0.60 | -0.73 | 4.25E-04 | down |
| ABTB1    | ENSG0000011462 | protein_coding;ret   | 3.3219   | 1.8794   | 1.77 | 0.82  | 4.27E-04 | up   |
| ITGAM    | ENSG0000016989 | protein_coding;ret   | 3.2463   | 1.8278   | 1.78 | 0.83  | 4.31E-04 | up   |
| PSAP     | ENSG0000019774 | protein_coding;ret   | 228.9167 | 157.7060 | 1.45 | 0.54  | 4.31E-04 | up   |
| HP       | ENSG0000025701 | protein_coding;ret   | 8.1885   | 4.7721   | 1.72 | 0.78  | 4.31E-04 | up   |
| EXOSC6   | ENSG0000022349 | protein_coding       | 3.0380   | 5.2130   | 0.58 | -0.78 | 4.33E-04 | down |
| B3GALNT1 | ENSG0000016925 | protein_coding;ret   | 1.1092   | 0.5481   | 2.02 | 1.02  | 4.37E-04 | up   |
| SHTN1    | ENSG0000018716 | protein_coding;proc  | 1.2460   | 0.6219   | 2.00 | 1.00  | 4.48E-04 | up   |
| MME      | ENSG0000019654 | protein_coding;ret   | 0.2349   | 0.0765   | 3.07 | 1.62  | 4.49E-04 | up   |
| FAT1     | ENSG0000008385 | protein_coding;ret   | 2.2951   | 1.3789   | 1.66 | 0.73  | 4.51E-04 | up   |
| METAP2   | ENSG0000011114 | protein_coding;no    | 20.9862  | 31.1889  | 0.67 | -0.57 | 4.51E-04 | down |
| MPZL1    | ENSG0000019796 | protein_coding;ret   | 1.7861   | 0.5836   | 3.06 | 1.61  | 4.64E-04 | up   |
| CXCL2    | ENSG0000008104 | retained_intron;proc | 0.2555   | 0.7946   | 0.32 | -1.64 | 4.65E-04 | down |
| CYB5A    | ENSG0000016634 | retained_intron;proc | 2.1055   | 1.1998   | 1.75 | 0.81  | 4.65E-04 | up   |
| NPM1P27  | ENSG0000024935 | processed_pseudo     | 69.7004  | 101.0036 | 0.69 | -0.54 | 4.66E-04 | down |
| KCNK5    | ENSG0000016462 | protein_coding       | 3.1883   | 5.6288   | 0.57 | -0.82 | 4.68E-04 | down |
| CNR2     | ENSG0000018882 | protein_coding       | 6.2274   | 3.8250   | 1.63 | 0.70  | 4.68E-04 | up   |
| ABCA13   | ENSG0000017986 | protein_coding;no    | 0.1505   | 0.0583   | 2.58 | 1.37  | 4.72E-04 | up   |
| EIF3E    | ENSG0000010440 | protein_coding;ret   | 140.3594 | 204.6070 | 0.69 | -0.54 | 4.80E-04 | down |
| C11orf21 | ENSG0000011066 | protein_coding;proc  | 16.6809  | 11.2709  | 1.48 | 0.57  | 4.86E-04 | up   |
| HELLS    | ENSG0000011996 | protein_coding;ret   | 2.4702   | 1.4473   | 1.71 | 0.77  | 4.89E-04 | up   |
| SLC25A24 | ENSG0000008549 | protein_coding;no    | 4.0379   | 6.2884   | 0.64 | -0.64 | 4.91E-04 | down |
| FAM72A   | ENSG0000019655 | protein_coding;proc  | 4.8550   | 8.1318   | 0.60 | -0.74 | 5.04E-04 | down |
| MTMR6    | ENSG0000013950 | protein_coding;proc  | 10.0136  | 14.4793  | 0.69 | -0.53 | 5.15E-04 | down |
| CEACAM4  | ENSG0000010535 | protein_coding;ret   | 6.7741   | 3.3727   | 2.01 | 1.01  | 5.23E-04 | up   |
| IL17RC   | ENSG0000016370 | protein_coding;no    | 0.0492   | 0.1581   | 0.31 | -1.68 | 5.30E-04 | down |
| LILRB2   | ENSG0000013104 | protein_coding;ret   | 1.8243   | 0.8299   | 2.20 | 1.14  | 5.31E-04 | up   |
| GYPC     | ENSG0000013673 | protein_coding;proc  | 14.7996  | 21.5128  | 0.69 | -0.54 | 5.32E-04 | down |
| NEU1     | ENSG0000020438 | retained_intron;proc | 5.8972   | 3.5279   | 1.67 | 0.74  | 5.37E-04 | up   |
| COPS2    | ENSG0000016620 | protein_coding;ret   | 7.9052   | 11.5547  | 0.68 | -0.55 | 5.40E-04 | down |
| HEBP2    | ENSG0000005162 | protein_coding;no    | 4.6627   | 6.8008   | 0.69 | -0.54 | 5.41E-04 | down |
| SLC38A2  | ENSG0000013429 | protein_coding;no    | 26.4344  | 38.0713  | 0.69 | -0.53 | 5.41E-04 | down |
| TMEM38A  | ENSG0000007295 | protein_coding;ret   | 1.2725   | 0.5136   | 2.48 | 1.31  | 5.44E-04 | up   |
| PSAT1    | ENSG0000013506 | protein_coding       | 82.9357  | 119.8023 | 0.69 | -0.53 | 5.53E-04 | down |
| NPM1     | ENSG0000018116 | retained_intron;proc | 223.4835 | 320.8496 | 0.70 | -0.52 | 5.54E-04 | down |
| HVCN1    | ENSG0000012298 | protein_coding;no    | 10.7563  | 6.9397   | 1.55 | 0.63  | 5.56E-04 | up   |
| PENK     | ENSG0000018119 | protein_coding;proc  | 0.6556   | 0.2504   | 2.62 | 1.39  | 5.62E-04 | up   |
| MTFR2    | ENSG0000014641 | protein_coding;no    | 5.1208   | 9.0584   | 0.57 | -0.82 | 5.67E-04 | down |
| RACK1    | ENSG0000020462 | protein_coding;ret   | 125.9441 | 183.2429 | 0.69 | -0.54 | 5.68E-04 | down |
| HACD2    | ENSG0000020652 | protein_coding;proc  | 7.1958   | 3.0361   | 2.37 | 1.24  | 5.70E-04 | up   |

|           |                |                     |          |          |       |       |          |      |
|-----------|----------------|---------------------|----------|----------|-------|-------|----------|------|
| TOMM22    | ENSG0000010021 | protein_coding;ret  | 37.7363  | 53.8730  | 0.70  | -0.51 | 5.74E-04 | down |
| BLVRA     | ENSG0000010660 | protein_coding;ret  | 4.5403   | 8.0447   | 0.56  | -0.83 | 6.00E-04 | down |
| PTGER2    | ENSG0000012538 | protein_coding      | 9.1822   | 14.3804  | 0.64  | -0.65 | 6.04E-04 | down |
| KDELCL1   | ENSG0000013490 | processed_transcri  | 9.5982   | 5.6301   | 1.70  | 0.77  | 6.15E-04 | up   |
| FBXO4     | ENSG0000015187 | protein_coding;ret  | 2.4113   | 4.3673   | 0.55  | -0.86 | 6.15E-04 | down |
| FFAR4     | ENSG0000018618 | protein_coding      | 0.4463   | 0.1537   | 2.90  | 1.54  | 6.24E-04 | up   |
| COL4A1    | ENSG0000018749 | protein_coding;ret  | 0.1916   | 0.4082   | 0.47  | -1.09 | 6.32E-04 | down |
| FOXC1     | ENSG0000005459 | protein_coding      | 1.2261   | 0.5012   | 2.45  | 1.29  | 6.34E-04 | up   |
| WBP2      | ENSG0000013247 | protein_coding;ret  | 8.4004   | 5.0514   | 1.66  | 0.73  | 6.45E-04 | up   |
| SULF2     | ENSG0000019656 | protein_coding;ret  | 4.0908   | 2.3567   | 1.74  | 0.80  | 6.50E-04 | up   |
| CCNL2     | ENSG0000022197 | protein_coding;ret  | 8.4236   | 13.5679  | 0.62  | -0.69 | 6.56E-04 | down |
| APOBEC3B  | ENSG0000017975 | protein_coding;no   | 4.0568   | 1.7957   | 2.26  | 1.18  | 6.56E-04 | up   |
| VHL       | ENSG0000013408 | protein_coding;prc  | 9.1498   | 5.3938   | 1.70  | 0.76  | 6.63E-04 | up   |
| SNHG29    | ENSG0000017506 | antisense;retained  | 105.4178 | 151.3970 | 0.70  | -0.52 | 6.63E-04 | down |
| SLC1A5    | ENSG0000010528 | protein_coding      | 25.1522  | 36.2097  | 0.69  | -0.53 | 6.68E-04 | down |
| PCGF2     | ENSG0000027725 | protein_coding      | 0.1697   | 0.4918   | 0.35  | -1.54 | 6.68E-04 | down |
| NKAPD1    | ENSG0000015077 | protein_coding;ret  | 4.1793   | 6.7832   | 0.62  | -0.70 | 6.71E-04 | down |
| CCL23     | ENSG0000027473 | protein_coding;no   | 1.8681   | 4.5236   | 0.41  | -1.28 | 6.75E-04 | down |
| PABPC4    | ENSG0000009062 | protein_coding;no   | 9.5783   | 13.9208  | 0.69  | -0.54 | 6.77E-04 | down |
| AC012321  | ENSG0000026077 | 3prime_overlappir   | 3.2555   | 0.1860   | 17.50 | 4.13  | 6.77E-04 | up   |
| EXOC4     | ENSG0000013155 | protein_coding;prc  | 6.0014   | 9.3086   | 0.64  | -0.63 | 6.86E-04 | down |
| BORCS8    | ENSG0000025490 | retained_intron;prc | 2.9417   | 1.6338   | 1.80  | 0.85  | 6.91E-04 | up   |
| CSF2RB    | ENSG0000010036 | protein_coding      | 15.6155  | 10.7790  | 1.45  | 0.53  | 6.92E-04 | up   |
| SOD2      | ENSG0000011209 | protein_coding;prc  | 1.0714   | 1.8228   | 0.59  | -0.77 | 7.06E-04 | down |
| AP1M1     | ENSG0000007295 | protein_coding;ret  | 1.7234   | 2.7208   | 0.63  | -0.66 | 7.08E-04 | down |
| PRR7      | ENSG0000013118 | protein_coding      | 0.7563   | 1.9550   | 0.39  | -1.37 | 7.18E-04 | down |
| TXNDC5    | ENSG0000023926 | retained_intron;prc | 98.4796  | 68.7880  | 1.43  | 0.52  | 7.36E-04 | up   |
| SFXN5     | ENSG0000014404 | processed_transcri  | 2.5693   | 1.5501   | 1.66  | 0.73  | 7.40E-04 | up   |
| IL23R     | ENSG0000016259 | protein_coding;no   | 3.5574   | 6.0940   | 0.58  | -0.78 | 7.64E-04 | down |
| AC090517  | ENSG0000028533 | processed_transcri  | 0.2038   | 0.0695   | 2.93  | 1.55  | 7.65E-04 | up   |
| HMGCR     | ENSG0000011316 | retained_intron;prc | 9.4976   | 6.0594   | 1.57  | 0.65  | 7.69E-04 | up   |
| CECR7     | ENSG0000023743 | processed_transcri  | 2.1971   | 1.0511   | 2.09  | 1.06  | 7.70E-04 | up   |
| SIGLEC5   | ENSG0000010550 | protein_coding      | 5.6564   | 3.1437   | 1.80  | 0.85  | 7.79E-04 | up   |
| RNF135    | ENSG0000018148 | protein_coding      | 3.4628   | 6.2207   | 0.56  | -0.85 | 7.88E-04 | down |
| ELANE     | ENSG0000019756 | protein_coding      | 488.5498 | 325.1915 | 1.50  | 0.59  | 7.96E-04 | up   |
| LCP2      | ENSG0000004346 | retained_intron;prc | 10.3120  | 16.6645  | 0.62  | -0.69 | 8.02E-04 | down |
| CHID1     | ENSG0000017783 | protein_coding;no   | 14.1265  | 9.5701   | 1.48  | 0.56  | 8.02E-04 | up   |
| ENC1      | ENSG0000017161 | protein_coding;prc  | 0.2650   | 0.5810   | 0.46  | -1.13 | 8.04E-04 | down |
| GJB6      | ENSG0000012174 | protein_coding      | 1.8234   | 0.8366   | 2.18  | 1.12  | 8.07E-04 | up   |
| ITGB2     | ENSG0000016025 | protein_coding;ret  | 23.7005  | 16.6063  | 1.43  | 0.51  | 8.10E-04 | up   |
| GNAS      | ENSG0000008746 | processed_transcri  | 22.1685  | 15.3074  | 1.45  | 0.53  | 8.11E-04 | up   |
| THAP9-AS1 | ENSG0000025102 | antisense           | 15.0727  | 21.6352  | 0.70  | -0.52 | 8.12E-04 | down |
| NID1      | ENSG0000011696 | protein_coding      | 0.1237   | 0.3691   | 0.33  | -1.58 | 8.25E-04 | down |
| DHRS9     | ENSG0000007373 | protein_coding      | 3.4328   | 1.6637   | 2.06  | 1.04  | 8.25E-04 | up   |
| AL441992  | ENSG0000028611 | protein_coding      | 0.0620   | 0.3154   | 0.20  | -2.35 | 8.33E-04 | down |
| TBCEL     | ENSG0000015411 | protein_coding;no   | 0.6913   | 1.4463   | 0.48  | -1.06 | 8.34E-04 | down |
| DCAF12    | ENSG0000019887 | protein_coding;prc  | 14.1510  | 20.1163  | 0.70  | -0.51 | 8.35E-04 | down |
| UGGT1     | ENSG0000013673 | nonsense_mediate    | 20.0808  | 14.0217  | 1.43  | 0.52  | 8.37E-04 | up   |

|          |                |                      |          |          |      |       |          |      |
|----------|----------------|----------------------|----------|----------|------|-------|----------|------|
| DDOST    | ENSG0000024403 | protein_coding;proc  | 140.3562 | 96.6557  | 1.45 | 0.54  | 8.44E-04 | up   |
| BEX4     | ENSG0000010240 | protein_coding       | 3.4212   | 1.5098   | 2.27 | 1.18  | 8.49E-04 | up   |
| TMEM268  | ENSG0000015769 | protein_coding;proc  | 1.6241   | 2.9191   | 0.56 | -0.85 | 8.52E-04 | down |
| ITM2A    | ENSG0000007859 | protein_coding;proc  | 11.6989  | 6.8447   | 1.71 | 0.77  | 8.56E-04 | up   |
| SNTB1    | ENSG0000017216 | protein_coding;proc  | 3.0809   | 7.0757   | 0.44 | -1.20 | 8.57E-04 | down |
| KIAA0355 | ENSG0000016639 | protein_coding;proc  | 0.8703   | 0.4315   | 2.02 | 1.01  | 8.60E-04 | up   |
| CCSER2   | ENSG0000010777 | protein_coding;no    | 1.9465   | 1.1185   | 1.74 | 0.80  | 8.65E-04 | up   |
| C8orf88  | ENSG0000025325 | protein_coding       | 2.8377   | 1.1237   | 2.53 | 1.34  | 8.75E-04 | up   |
| ZNF44    | ENSG0000019785 | protein_coding;no    | 1.2668   | 0.6423   | 1.97 | 0.98  | 8.77E-04 | up   |
| ADO      | ENSG0000018191 | protein_coding       | 7.9408   | 11.7451  | 0.68 | -0.56 | 8.88E-04 | down |
| AP5S1    | ENSG0000012584 | protein_coding       | 0.5207   | 1.0960   | 0.48 | -1.07 | 9.00E-04 | down |
| ZBTB25   | ENSG0000008977 | protein_coding       | 0.4997   | 0.1815   | 2.75 | 1.46  | 9.01E-04 | up   |
| C3orf80  | ENSG0000018004 | protein_coding;no    | 0.5953   | 0.1465   | 4.06 | 2.02  | 9.08E-04 | up   |
| SMIM19   | ENSG0000017620 | protein_coding;no    | 2.7160   | 4.6619   | 0.58 | -0.78 | 9.17E-04 | down |
| NABP2    | ENSG0000013957 | protein_coding;ret   | 10.8296  | 17.1722  | 0.63 | -0.67 | 9.33E-04 | down |
| MPC1     | ENSG0000006076 | processed_transcri   | 29.3526  | 19.2751  | 1.52 | 0.61  | 9.41E-04 | up   |
| LRRC8D   | ENSG0000017149 | protein_coding       | 7.2978   | 16.4183  | 0.44 | -1.17 | 9.45E-04 | down |
| RPL35A   | ENSG0000018289 | protein_coding;ret   | 263.4460 | 377.8221 | 0.70 | -0.52 | 9.46E-04 | down |
| LENG8    | ENSG0000016761 | protein_coding;ret   | 24.2316  | 16.7823  | 1.44 | 0.53  | 9.65E-04 | up   |
| DSE      | ENSG0000011181 | protein_coding;ret   | 0.3559   | 0.1739   | 2.05 | 1.03  | 9.66E-04 | up   |
| AC093668 | ENSG0000027294 | nonsense_mediate     | 0.0122   | 0.2866   | 0.04 | -4.56 | 9.68E-04 | down |
| RBMX2    | ENSG0000013459 | protein_coding;proc  | 6.5760   | 10.8582  | 0.61 | -0.72 | 9.79E-04 | down |
| SFXN3    | ENSG0000010781 | protein_coding;proc  | 2.7989   | 4.7613   | 0.59 | -0.77 | 9.79E-04 | down |
| SLC22A15 | ENSG0000016339 | processed_transcri   | 10.5348  | 15.1347  | 0.70 | -0.52 | 1.00E-03 | down |
| SLC25A4  | ENSG0000015172 | protein_coding;no    | 1.2215   | 0.5889   | 2.07 | 1.05  | 1.01E-03 | up   |
| ATP9B    | ENSG0000016637 | retained_intron;proc | 2.8935   | 1.9431   | 1.49 | 0.57  | 1.01E-03 | up   |
| ZCCHC7   | ENSG0000014790 | protein_coding;proc  | 6.6005   | 10.1467  | 0.65 | -0.62 | 1.03E-03 | down |
| SRRM2    | ENSG0000016797 | protein_coding;no    | 23.5429  | 13.5014  | 1.74 | 0.80  | 1.03E-03 | up   |
| BSG      | ENSG0000017227 | protein_coding;ret   | 75.0378  | 52.4398  | 1.43 | 0.52  | 1.03E-03 | up   |
| ABI2     | ENSG0000013844 | protein_coding;no    | 0.2116   | 0.0797   | 2.65 | 1.41  | 1.03E-03 | up   |
| CCNB1IP1 | ENSG0000010081 | protein_coding;no    | 19.1659  | 28.0015  | 0.68 | -0.55 | 1.03E-03 | down |
| E2F7     | ENSG0000016589 | protein_coding;ret   | 1.8317   | 0.9915   | 1.85 | 0.89  | 1.03E-03 | up   |
| ZNF253   | ENSG0000025677 | protein_coding;ret   | 3.0696   | 6.6843   | 0.46 | -1.12 | 1.04E-03 | down |
| ABLIM1   | ENSG0000009920 | protein_coding;ret   | 0.7924   | 0.2534   | 3.13 | 1.64  | 1.05E-03 | up   |
| CCDC26   | ENSG0000022914 | lincRNA              | 0.4233   | 0.8121   | 0.52 | -0.94 | 1.05E-03 | down |
| TRAF3IP3 | ENSG0000000979 | protein_coding;ret   | 5.9567   | 4.0471   | 1.47 | 0.56  | 1.05E-03 | up   |
| AQP9     | ENSG0000010356 | protein_coding;proc  | 7.1216   | 4.2272   | 1.68 | 0.75  | 1.05E-03 | up   |
| LILRA6   | ENSG0000024448 | protein_coding;no    | 0.9404   | 0.3899   | 2.41 | 1.27  | 1.06E-03 | up   |
| UPK3A    | ENSG0000010037 | protein_coding       | 13.9129  | 7.7680   | 1.79 | 0.84  | 1.07E-03 | up   |
| MTHFD2   | ENSG0000006591 | protein_coding;proc  | 71.5322  | 101.8702 | 0.70 | -0.51 | 1.07E-03 | down |
| SUMO2P17 | ENSG0000024827 | transcribed_proces   | 0.2319   | 1.2982   | 0.18 | -2.48 | 1.09E-03 | down |
| NUDT14   | ENSG0000018382 | protein_coding;ret   | 0.7737   | 0.2755   | 2.81 | 1.49  | 1.11E-03 | up   |
| SLC9A7   | ENSG0000006592 | protein_coding;proc  | 0.0787   | 0.2319   | 0.34 | -1.56 | 1.11E-03 | down |
| MYH15    | ENSG0000014482 | retained_intron;proc | 2.0591   | 1.1485   | 1.79 | 0.84  | 1.11E-03 | up   |
| OSTC     | ENSG0000019885 | protein_coding;proc  | 58.0989  | 86.4481  | 0.67 | -0.57 | 1.11E-03 | down |
| THG1L    | ENSG0000011327 | protein_coding;no    | 4.0800   | 6.9601   | 0.59 | -0.77 | 1.12E-03 | down |
| IL18R1   | ENSG0000011560 | protein_coding;ret   | 2.1525   | 1.1516   | 1.87 | 0.90  | 1.12E-03 | up   |
| AL049830 | ENSG0000025852 | antisense            | 3.3788   | 1.5499   | 2.18 | 1.12  | 1.12E-03 | up   |

|           |                |                     |          |          |      |       |          |      |
|-----------|----------------|---------------------|----------|----------|------|-------|----------|------|
| ASPM      | ENSG0000006627 | protein_coding      | 5.1422   | 7.3134   | 0.70 | -0.51 | 1.12E-03 | down |
| ENPP3     | ENSG0000015426 | protein_coding;no   | 0.4846   | 0.1678   | 2.89 | 1.53  | 1.12E-03 | up   |
| OAS3      | ENSG0000011133 | protein_coding;pro  | 0.2128   | 0.0815   | 2.61 | 1.38  | 1.13E-03 | up   |
| SNHG7     | ENSG0000023301 | antisense           | 8.2574   | 12.1734  | 0.68 | -0.56 | 1.13E-03 | down |
| TEC       | ENSG0000013560 | protein_coding;no   | 2.2500   | 3.8657   | 0.58 | -0.78 | 1.14E-03 | down |
| CXCL8     | ENSG0000016942 | protein_coding;ret  | 95.5405  | 142.2234 | 0.67 | -0.57 | 1.15E-03 | down |
| STIL      | ENSG0000012347 | protein_coding;ret  | 5.4703   | 3.4407   | 1.59 | 0.67  | 1.15E-03 | up   |
| BCAT1     | ENSG0000006098 | protein_coding;pro  | 6.1676   | 9.0369   | 0.68 | -0.55 | 1.17E-03 | down |
| TRAPPC11  | ENSG0000016853 | retained_intron;pro | 7.4857   | 10.7826  | 0.69 | -0.53 | 1.19E-03 | down |
| RRAGD     | ENSG0000002503 | protein_coding;pro  | 11.1707  | 16.5187  | 0.68 | -0.56 | 1.20E-03 | down |
| POMGNT2   | ENSG0000014464 | protein_coding      | 2.5537   | 1.3075   | 1.95 | 0.97  | 1.20E-03 | up   |
| AC092045  | ENSG0000023955 | processed_pseudo;   | 0.3495   | 0.9572   | 0.37 | -1.45 | 1.23E-03 | down |
| BST1      | ENSG0000010974 | protein_coding      | 27.9946  | 19.7386  | 1.42 | 0.50  | 1.23E-03 | up   |
| ACVR1     | ENSG0000011517 | protein_coding;pro  | 0.0501   | 0.1884   | 0.27 | -1.91 | 1.23E-03 | down |
| RNF175    | ENSG0000014542 | protein_coding;pro  | 0.1659   | 0.4188   | 0.40 | -1.34 | 1.24E-03 | down |
| JPT2      | ENSG0000020605 | protein_coding;pro  | 11.6153  | 3.7580   | 3.09 | 1.63  | 1.24E-03 | up   |
| SESN2     | ENSG0000013076 | protein_coding      | 3.1414   | 5.3593   | 0.59 | -0.77 | 1.25E-03 | down |
| KIAA1586  | ENSG0000016811 | protein_coding;pro  | 8.8625   | 14.6303  | 0.61 | -0.72 | 1.25E-03 | down |
| SNHG8     | ENSG0000026989 | lincRNA             | 31.3276  | 46.3843  | 0.68 | -0.57 | 1.25E-03 | down |
| ANKRD55   | ENSG0000016451 | protein_coding;pro  | 1.3211   | 2.5213   | 0.52 | -0.93 | 1.26E-03 | down |
| C6orf62   | ENSG0000011230 | protein_coding      | 33.3758  | 46.3845  | 0.72 | -0.47 | 1.26E-03 | down |
| EPHB6     | ENSG0000010612 | retained_intron;no  | 0.5705   | 0.2436   | 2.34 | 1.23  | 1.26E-03 | up   |
| VWA5A     | ENSG0000011000 | protein_coding;ret  | 1.4248   | 0.6996   | 2.04 | 1.03  | 1.26E-03 | up   |
| AC012651  | ENSG0000025846 | nonsense_mediate    | 2.1555   | 3.8506   | 0.56 | -0.84 | 1.27E-03 | down |
| ETNK1     | ENSG0000013916 | protein_coding;ret  | 5.6885   | 8.1405   | 0.70 | -0.52 | 1.28E-03 | down |
| ALOX5AP   | ENSG0000013296 | protein_coding;pro  | 189.6469 | 134.7331 | 1.41 | 0.49  | 1.29E-03 | up   |
| ADAP1     | ENSG0000010596 | retained_intron;pro | 2.5232   | 4.1967   | 0.60 | -0.73 | 1.29E-03 | down |
| GNL3LP1   | ENSG0000021503 | processed_pseudo;   | 0.1508   | 0.5153   | 0.29 | -1.77 | 1.32E-03 | down |
| GPR65     | ENSG0000014003 | protein_coding      | 4.2386   | 2.5007   | 1.69 | 0.76  | 1.32E-03 | up   |
| CD276     | ENSG0000010385 | nonsense_mediate    | 0.0830   | 0.2584   | 0.32 | -1.64 | 1.32E-03 | down |
| MYADM     | ENSG0000017982 | protein_coding;pro  | 15.1665  | 8.8378   | 1.72 | 0.78  | 1.36E-03 | up   |
| UBA3      | ENSG0000014474 | retained_intron;pro | 11.1601  | 17.7977  | 0.63 | -0.67 | 1.37E-03 | down |
| KIAA0930  | ENSG0000010036 | retained_intron;pro | 14.1414  | 20.0476  | 0.71 | -0.50 | 1.38E-03 | down |
| EGR1      | ENSG0000012073 | protein_coding      | 5.4871   | 2.9407   | 1.87 | 0.90  | 1.38E-03 | up   |
| RPL21P16  | ENSG0000022084 | processed_pseudo;   | 250.5644 | 373.5926 | 0.67 | -0.58 | 1.38E-03 | down |
| ARPC4-TTL | ENSG0000025015 | nonsense_mediate    | 3.4732   | 1.6373   | 2.12 | 1.08  | 1.40E-03 | up   |
| DENND1A   | ENSG0000011952 | protein_coding;pro  | 1.6273   | 2.5910   | 0.63 | -0.67 | 1.40E-03 | down |
| MARCH7    | ENSG0000013653 | processed_transcri  | 11.7788  | 17.4548  | 0.67 | -0.57 | 1.41E-03 | down |
| NECAB1    | ENSG0000012311 | protein_coding;pro  | 0.1436   | 0.0307   | 4.67 | 2.22  | 1.41E-03 | up   |
| RHOXF1P1  | ENSG0000023449 | processed_transcri  | 4.0872   | 2.0782   | 1.97 | 0.98  | 1.44E-03 | up   |
| HMGB1P10  | ENSG0000021370 | processed_pseudo;   | 9.6360   | 21.2682  | 0.45 | -1.14 | 1.44E-03 | down |
| TK1       | ENSG0000016790 | protein_coding;ret  | 31.3981  | 21.8096  | 1.44 | 0.53  | 1.44E-03 | up   |
| RAVER2    | ENSG0000016243 | protein_coding;no   | 5.4522   | 3.4130   | 1.60 | 0.68  | 1.46E-03 | up   |
| THBS4     | ENSG0000011329 | processed_transcri  | 1.0093   | 1.8729   | 0.54 | -0.89 | 1.48E-03 | down |
| ST7-AS1   | ENSG0000022719 | antisense           | 0.1435   | 0.4647   | 0.31 | -1.69 | 1.48E-03 | down |
| FCGR1B    | ENSG0000019801 | processed_transcri  | 2.4737   | 4.4853   | 0.55 | -0.86 | 1.49E-03 | down |
| NCK2      | ENSG0000007105 | protein_coding      | 3.7750   | 7.5478   | 0.50 | -1.00 | 1.49E-03 | down |
| SNHG12    | ENSG0000019798 | antisense;retained  | 2.3034   | 3.8481   | 0.60 | -0.74 | 1.49E-03 | down |

|           |                |                     |          |          |      |       |          |      |
|-----------|----------------|---------------------|----------|----------|------|-------|----------|------|
| AKR1B1    | ENSG0000008566 | protein_coding;ret  | 0.6368   | 1.4681   | 0.43 | -1.21 | 1.50E-03 | down |
| CBR1      | ENSG0000015922 | protein_coding;pro  | 14.3685  | 9.4032   | 1.53 | 0.61  | 1.50E-03 | up   |
| TMEM106B  | ENSG0000010646 | protein_coding;ret  | 1.2272   | 2.1155   | 0.58 | -0.79 | 1.51E-03 | down |
| PDE1B     | ENSG0000012336 | protein_coding;pro  | 0.1582   | 0.3790   | 0.42 | -1.26 | 1.52E-03 | down |
| ADCY4     | ENSG0000012946 | nonsense_mediate    | 0.6435   | 0.3150   | 2.04 | 1.03  | 1.53E-03 | up   |
| HPRT1     | ENSG0000016570 | protein_coding;pro  | 42.6530  | 59.8600  | 0.71 | -0.49 | 1.53E-03 | down |
| GARS      | ENSG0000010610 | nonsense_mediate    | 34.3712  | 47.6154  | 0.72 | -0.47 | 1.55E-03 | down |
| ZC3H6     | ENSG0000018817 | protein_coding;ret  | 0.2617   | 0.5948   | 0.44 | -1.18 | 1.55E-03 | down |
| CRELD2    | ENSG0000018416 | retained_intron;pro | 3.8997   | 2.2704   | 1.72 | 0.78  | 1.55E-03 | up   |
| ATF4      | ENSG0000012827 | protein_coding      | 218.1419 | 304.2272 | 0.72 | -0.48 | 1.56E-03 | down |
| RSL1D1    | ENSG0000017149 | retained_intron;pro | 37.4966  | 53.2898  | 0.70 | -0.51 | 1.56E-03 | down |
| SLC3A2    | ENSG0000016800 | protein_coding;no   | 23.2090  | 32.0506  | 0.72 | -0.47 | 1.57E-03 | down |
| TVP23C-CE | ENSG0000025902 | protein_coding;no   | 2.0444   | 0.2693   | 7.59 | 2.92  | 1.57E-03 | up   |
| ESD       | ENSG0000013968 | protein_coding;pro  | 36.2072  | 50.6478  | 0.71 | -0.48 | 1.57E-03 | down |
| PTP4A3    | ENSG0000018448 | protein_coding      | 2.9648   | 1.4979   | 1.98 | 0.99  | 1.58E-03 | up   |
| ARHGAP22  | ENSG0000012880 | protein_coding;pro  | 0.1282   | 0.0434   | 2.95 | 1.56  | 1.59E-03 | up   |
| CCNC      | ENSG0000011223 | protein_coding;no   | 5.7766   | 8.3324   | 0.69 | -0.53 | 1.62E-03 | down |
| PTPDC1    | ENSG0000015807 | protein_coding;pro  | 0.8417   | 0.4060   | 2.07 | 1.05  | 1.62E-03 | up   |
| CCND2     | ENSG0000011897 | protein_coding;ret  | 12.3939  | 17.1533  | 0.72 | -0.47 | 1.63E-03 | down |
| LPIN1     | ENSG0000013432 | protein_coding;ret  | 0.6786   | 0.3574   | 1.90 | 0.93  | 1.63E-03 | up   |
| MRPL33    | ENSG0000024314 | processed_transcri  | 36.5444  | 51.3553  | 0.71 | -0.49 | 1.64E-03 | down |
| PREPL     | ENSG0000013807 | nonsense_mediate    | 9.2413   | 5.8442   | 1.58 | 0.66  | 1.64E-03 | up   |
| AC022148  | ENSG0000018045 | antisense           | 0.2802   | 0.0512   | 5.48 | 2.45  | 1.64E-03 | up   |
| RF02104   | ENSG0000027354 | misc_RNA            | 12.3302  | 22.9008  | 0.54 | -0.89 | 1.65E-03 | down |
| HAUS5     | ENSG0000024911 | retained_intron;pro | 4.4001   | 2.5802   | 1.71 | 0.77  | 1.65E-03 | up   |
| PLXNA3    | ENSG0000013082 | protein_coding;ret  | 0.2466   | 0.1061   | 2.33 | 1.22  | 1.66E-03 | up   |
| CDK6      | ENSG0000010581 | protein_coding;ret  | 7.9658   | 11.1815  | 0.71 | -0.49 | 1.66E-03 | down |
| CISD2     | ENSG0000014535 | protein_coding;no   | 5.1782   | 2.8023   | 1.85 | 0.89  | 1.67E-03 | up   |
| NFKBIZ    | ENSG0000014480 | protein_coding;ret  | 0.9199   | 0.4040   | 2.28 | 1.19  | 1.71E-03 | up   |
| SNX5      | ENSG0000008900 | processed_transcri  | 14.7315  | 20.2678  | 0.73 | -0.46 | 1.72E-03 | down |
| RPF2      | ENSG0000019749 | nonsense_mediate    | 13.7704  | 19.6370  | 0.70 | -0.51 | 1.73E-03 | down |
| UBE2L6    | ENSG0000015658 | protein_coding;ret  | 7.5133   | 12.3345  | 0.61 | -0.72 | 1.73E-03 | down |
| RABGGTB   | ENSG0000013795 | processed_transcri  | 12.5791  | 17.3411  | 0.73 | -0.46 | 1.75E-03 | down |
| CALCOCO1  | ENSG0000001282 | protein_coding;ret  | 3.9472   | 2.5860   | 1.53 | 0.61  | 1.75E-03 | up   |
| CEBPB     | ENSG0000017221 | protein_coding      | 13.2681  | 19.9534  | 0.66 | -0.59 | 1.76E-03 | down |
| TSPAN4    | ENSG0000021406 | protein_coding;ret  | 2.0846   | 1.1924   | 1.75 | 0.81  | 1.76E-03 | up   |
| MS4A4E    | ENSG0000021478 | protein_coding;pro  | 0.1022   | 0.3499   | 0.29 | -1.77 | 1.78E-03 | down |
| LILRB3    | ENSG0000020457 | protein_coding;ret  | 1.3340   | 0.6162   | 2.16 | 1.11  | 1.78E-03 | up   |
| ZDHHC16   | ENSG0000017130 | protein_coding;pro  | 10.6884  | 6.2159   | 1.72 | 0.78  | 1.80E-03 | up   |
| ZNF347    | ENSG0000019793 | protein_coding;ret  | 0.2256   | 0.0924   | 2.44 | 1.29  | 1.80E-03 | up   |
| RPL4      | ENSG0000017444 | retained_intron;pro | 301.4217 | 414.9412 | 0.73 | -0.46 | 1.81E-03 | down |
| MRPL18    | ENSG0000011211 | processed_transcri  | 61.2830  | 84.7276  | 0.72 | -0.47 | 1.82E-03 | down |
| CD59      | ENSG0000008506 | protein_coding;ret  | 12.6968  | 8.0083   | 1.59 | 0.66  | 1.82E-03 | up   |
| HBEGF     | ENSG0000011307 | protein_coding;ret  | 2.3167   | 4.1864   | 0.55 | -0.85 | 1.83E-03 | down |
| MPP3      | ENSG0000016164 | retained_intron;no  | 0.0789   | 0.2725   | 0.29 | -1.79 | 1.83E-03 | down |
| MANF      | ENSG0000014505 | nonsense_mediate    | 23.4171  | 16.3531  | 1.43 | 0.52  | 1.84E-03 | up   |
| MYBL1     | ENSG0000018569 | protein_coding;pro  | 0.2342   | 0.0827   | 2.83 | 1.50  | 1.85E-03 | up   |
| MTHFD1L   | ENSG0000012025 | protein_coding;pro  | 8.8879   | 12.4599  | 0.71 | -0.49 | 1.92E-03 | down |

|           |                |                      |          |          |      |       |          |      |
|-----------|----------------|----------------------|----------|----------|------|-------|----------|------|
| S100A4    | ENSG0000019615 | protein_coding;proc  | 116.6399 | 80.7996  | 1.44 | 0.53  | 1.94E-03 | up   |
| ACP5      | ENSG0000010257 | protein_coding;ret   | 0.5309   | 0.1986   | 2.67 | 1.42  | 1.95E-03 | up   |
| IARS      | ENSG0000019630 | protein_coding;proc  | 36.4970  | 50.3582  | 0.72 | -0.46 | 1.96E-03 | down |
| MED20     | ENSG0000012464 | protein_coding;proc  | 12.4964  | 7.8056   | 1.60 | 0.68  | 1.97E-03 | up   |
| RPL4P4    | ENSG0000022963 | processed_pseudo;    | 18.0293  | 27.2495  | 0.66 | -0.60 | 1.97E-03 | down |
| TM9SF4    | ENSG0000010133 | retained_intron;proc | 5.6540   | 8.1135   | 0.70 | -0.52 | 1.98E-03 | down |
| AC093849  | ENSG0000028603 | lincRNA              | 0.1822   | 0.6442   | 0.28 | -1.82 | 1.99E-03 | down |
| KLHL23    | ENSG0000021316 | protein_coding;ret   | 4.3567   | 2.6607   | 1.64 | 0.71  | 2.00E-03 | up   |
| TIMM9     | ENSG0000010057 | protein_coding;proc  | 14.8410  | 23.9183  | 0.62 | -0.69 | 2.01E-03 | down |
| CCDC43    | ENSG0000018032 | protein_coding;ret   | 8.9427   | 14.4655  | 0.62 | -0.69 | 2.02E-03 | down |
| RPS25     | ENSG0000011818 | nonsense_mediate     | 516.5259 | 716.2976 | 0.72 | -0.47 | 2.05E-03 | down |
| GAS2L3    | ENSG0000013935 | protein_coding;no    | 0.3834   | 0.8774   | 0.44 | -1.19 | 2.06E-03 | down |
| CHST10    | ENSG0000011552 | protein_coding;ret   | 1.2197   | 0.6335   | 1.93 | 0.95  | 2.06E-03 | up   |
| RPIA      | ENSG0000015357 | protein_coding       | 27.1772  | 38.2991  | 0.71 | -0.49 | 2.08E-03 | down |
| AC008763  | ENSG0000026971 | protein_coding       | 7.7284   | 1.1218   | 6.89 | 2.78  | 2.08E-03 | up   |
| MICAL1    | ENSG0000013559 | retained_intron;proc | 3.3619   | 5.0630   | 0.66 | -0.59 | 2.09E-03 | down |
| EML3      | ENSG0000014949 | protein_coding;ret   | 2.5758   | 4.1282   | 0.62 | -0.68 | 2.10E-03 | down |
| RNASE6    | ENSG0000016941 | protein_coding       | 4.6261   | 8.6754   | 0.53 | -0.91 | 2.10E-03 | down |
| EIF3H     | ENSG0000014767 | protein_coding;ret   | 54.0958  | 78.5585  | 0.69 | -0.54 | 2.13E-03 | down |
| CLEC5A    | ENSG0000025822 | protein_coding;ret   | 72.1372  | 99.6071  | 0.72 | -0.47 | 2.14E-03 | down |
| CST7      | ENSG0000007798 | protein_coding       | 557.3984 | 402.8011 | 1.38 | 0.47  | 2.15E-03 | up   |
| EIF5      | ENSG0000010066 | retained_intron;proc | 12.2819  | 17.1818  | 0.71 | -0.48 | 2.15E-03 | down |
| PLPP1     | ENSG0000006711 | protein_coding;ret   | 6.9673   | 4.0235   | 1.73 | 0.79  | 2.16E-03 | up   |
| LCMT2     | ENSG0000016880 | protein_coding       | 0.7229   | 1.3198   | 0.55 | -0.87 | 2.16E-03 | down |
| ATP1B1    | ENSG0000014315 | protein_coding       | 0.5594   | 0.1102   | 5.08 | 2.34  | 2.16E-03 | up   |
| LINC00599 | ENSG0000025323 | lincRNA              | 2.8563   | 1.5539   | 1.84 | 0.88  | 2.18E-03 | up   |
| RAD9B     | ENSG0000015116 | protein_coding;no    | 0.3765   | 0.8687   | 0.43 | -1.21 | 2.18E-03 | down |
| HERC6     | ENSG0000013864 | protein_coding;no    | 0.9340   | 0.4823   | 1.94 | 0.95  | 2.18E-03 | up   |
| ECHDC2    | ENSG0000012131 | retained_intron;no   | 0.6443   | 0.3297   | 1.95 | 0.97  | 2.19E-03 | up   |
| FOSL2     | ENSG0000007542 | protein_coding;proc  | 3.4293   | 6.2821   | 0.55 | -0.87 | 2.20E-03 | down |
| JAG1      | ENSG0000010138 | retained_intron;proc | 3.6029   | 5.2010   | 0.69 | -0.53 | 2.23E-03 | down |
| PIF1      | ENSG0000014045 | protein_coding;ret   | 0.1890   | 0.4453   | 0.42 | -1.24 | 2.23E-03 | down |
| BCL11A    | ENSG0000011986 | protein_coding;proc  | 0.5848   | 0.9362   | 0.62 | -0.68 | 2.23E-03 | down |
| TUBG1     | ENSG0000013146 | retained_intron;proc | 17.0237  | 11.4427  | 1.49 | 0.57  | 2.26E-03 | up   |
| RAMP1     | ENSG0000013232 | protein_coding       | 1.5979   | 0.6118   | 2.61 | 1.39  | 2.26E-03 | up   |
| LMAN2     | ENSG0000016922 | protein_coding;ret   | 42.8587  | 29.9122  | 1.43 | 0.52  | 2.26E-03 | up   |
| NRIP3     | ENSG0000017535 | protein_coding       | 7.4926   | 4.8623   | 1.54 | 0.62  | 2.27E-03 | up   |
| PHOSPHO2  | ENSG0000014436 | protein_coding;proc  | 2.4098   | 1.1625   | 2.07 | 1.05  | 2.27E-03 | up   |
| LSS       | ENSG0000016028 | retained_intron;proc | 7.9211   | 4.8509   | 1.63 | 0.71  | 2.28E-03 | up   |
| MARCH2    | ENSG0000009978 | protein_coding;ret   | 2.3088   | 1.1769   | 1.96 | 0.97  | 2.29E-03 | up   |
| TMEM68    | ENSG0000016790 | protein_coding;ret   | 1.9692   | 3.1391   | 0.63 | -0.67 | 2.30E-03 | down |
| SETD5     | ENSG0000016813 | protein_coding;no    | 3.6645   | 2.3553   | 1.56 | 0.64  | 2.30E-03 | up   |
| RAD51B    | ENSG0000018218 | protein_coding;proc  | 0.4863   | 0.9191   | 0.53 | -0.92 | 2.33E-03 | down |
| SUMF2     | ENSG0000012910 | protein_coding;no    | 30.9952  | 21.7426  | 1.43 | 0.51  | 2.33E-03 | up   |
| ZSWIM4    | ENSG0000013200 | protein_coding       | 0.3457   | 0.1046   | 3.30 | 1.72  | 2.34E-03 | up   |
| TARS      | ENSG0000011340 | nonsense_mediate     | 32.6104  | 44.8114  | 0.73 | -0.46 | 2.35E-03 | down |
| EXT2      | ENSG0000015134 | protein_coding;ret   | 4.9079   | 3.0720   | 1.60 | 0.68  | 2.38E-03 | up   |
| IL7R      | ENSG0000016868 | protein_coding;proc  | 0.1787   | 0.0485   | 3.69 | 1.88  | 2.39E-03 | up   |



|           |                |                     |          |          |      |       |          |      |
|-----------|----------------|---------------------|----------|----------|------|-------|----------|------|
| ZNF213    | ENSG0000008564 | protein_coding;ret  | 1.2654   | 0.6822   | 1.85 | 0.89  | 2.39E-03 | up   |
| TFB1M     | ENSG0000002963 | processed_transcri  | 3.8079   | 6.0143   | 0.63 | -0.66 | 2.39E-03 | down |
| MZB1      | ENSG0000017047 | nonsense_mediate    | 7.6848   | 4.6316   | 1.66 | 0.73  | 2.39E-03 | up   |
| CCNB1     | ENSG0000013405 | protein_coding;no   | 13.7195  | 19.4843  | 0.70 | -0.51 | 2.40E-03 | down |
| CAMK1     | ENSG0000013407 | nonsense_mediate    | 20.9543  | 14.6233  | 1.43 | 0.52  | 2.40E-03 | up   |
| SEC11A    | ENSG0000014061 | protein_coding;ret  | 20.1730  | 27.5488  | 0.73 | -0.45 | 2.41E-03 | down |
| UBB       | ENSG0000017031 | protein_coding;prc  | 112.2732 | 81.3541  | 1.38 | 0.46  | 2.42E-03 | up   |
| DRAM1     | ENSG0000013604 | protein_coding;no   | 3.0754   | 1.6335   | 1.88 | 0.91  | 2.43E-03 | up   |
| ARF1      | ENSG0000014376 | protein_coding;prc  | 60.9147  | 34.4449  | 1.77 | 0.82  | 2.43E-03 | up   |
| RGL2      | ENSG0000023744 | retained_intron;prc | 6.5843   | 4.2010   | 1.57 | 0.65  | 2.45E-03 | up   |
| DDIT3     | ENSG0000017519 | protein_coding      | 26.2490  | 38.5772  | 0.68 | -0.56 | 2.45E-03 | down |
| PLEKHA8P  | ENSG0000013429 | transcribed_proces  | 2.6457   | 1.4089   | 1.88 | 0.91  | 2.49E-03 | up   |
| RAB4A     | ENSG0000016811 | protein_coding;prc  | 11.3468  | 17.3898  | 0.65 | -0.62 | 2.52E-03 | down |
| BLM       | ENSG0000019729 | nonsense_mediate    | 6.9823   | 9.6867   | 0.72 | -0.47 | 2.53E-03 | down |
| NOMO3     | ENSG0000010322 | nonsense_mediate    | 8.6783   | 6.1383   | 1.41 | 0.50  | 2.54E-03 | up   |
| MAP7D2    | ENSG0000018436 | protein_coding;prc  | 0.4406   | 0.1818   | 2.42 | 1.28  | 2.55E-03 | up   |
| AMOTL1    | ENSG0000016602 | protein_coding;prc  | 0.8251   | 0.4384   | 1.88 | 0.91  | 2.56E-03 | up   |
| RPL24P4   | ENSG0000018152 | processed_pseudo;   | 74.6202  | 112.0507 | 0.67 | -0.59 | 2.56E-03 | down |
| DHRS11    | ENSG0000027853 | protein_coding;ret  | 1.6041   | 0.8975   | 1.79 | 0.84  | 2.58E-03 | up   |
| FHDC1     | ENSG0000013746 | protein_coding      | 0.2007   | 0.0577   | 3.48 | 1.80  | 2.58E-03 | up   |
| SEPT8     | ENSG0000016440 | protein_coding;prc  | 1.5588   | 0.9130   | 1.71 | 0.77  | 2.61E-03 | up   |
| AC004803  | ENSG0000025013 | antisense           | 0.2692   | 0.6232   | 0.43 | -1.21 | 2.61E-03 | down |
| RPL23AP42 | ENSG0000023485 | processed_pseudo;   | 80.6077  | 122.5888 | 0.66 | -0.60 | 2.64E-03 | down |
| STX3      | ENSG0000016690 | protein_coding;ret  | 8.3488   | 4.5610   | 1.83 | 0.87  | 2.68E-03 | up   |
| R3HDM2    | ENSG0000017991 | retained_intron;prc | 3.8917   | 5.8754   | 0.66 | -0.59 | 2.70E-03 | down |
| STARD3NL  | ENSG0000001027 | protein_coding;ret  | 10.6071  | 14.6354  | 0.72 | -0.46 | 2.72E-03 | down |
| PLD3      | ENSG0000010522 | protein_coding;prc  | 3.7890   | 2.2403   | 1.69 | 0.76  | 2.72E-03 | up   |
| SNX33     | ENSG0000017354 | protein_coding      | 0.1023   | 0.2514   | 0.41 | -1.30 | 2.73E-03 | down |
| SLC1A4    | ENSG0000011590 | protein_coding;ret  | 8.5468   | 11.8250  | 0.72 | -0.47 | 2.74E-03 | down |
| HSD17B7   | ENSG0000013219 | processed_transcri  | 3.0342   | 1.7951   | 1.69 | 0.76  | 2.76E-03 | up   |
| KIAA1147  | ENSG0000025709 | protein_coding      | 3.1561   | 1.9846   | 1.59 | 0.67  | 2.77E-03 | up   |
| DECR2     | ENSG0000024261 | retained_intron;prc | 2.3352   | 1.2499   | 1.87 | 0.90  | 2.77E-03 | up   |
| ERMAP     | ENSG0000016401 | protein_coding;ret  | 0.8234   | 1.4900   | 0.55 | -0.86 | 2.79E-03 | down |
| ARHGAP25  | ENSG0000016321 | protein_coding;prc  | 10.4997  | 7.3881   | 1.42 | 0.51  | 2.82E-03 | up   |
| SCAMP1    | ENSG0000008536 | protein_coding;no   | 2.7567   | 5.3361   | 0.52 | -0.95 | 2.83E-03 | down |
| CU633904  | ENSG0000027607 | lincRNA             | 0.5025   | 0.1305   | 3.85 | 1.95  | 2.85E-03 | up   |
| CABLES2   | ENSG0000014967 | protein_coding      | 1.1811   | 0.5281   | 2.24 | 1.16  | 2.85E-03 | up   |
| L2HGDH    | ENSG0000008729 | protein_coding;no   | 5.5298   | 3.6762   | 1.50 | 0.59  | 2.86E-03 | up   |
| MIER1     | ENSG0000019816 | protein_coding;prc  | 5.6900   | 3.7924   | 1.50 | 0.59  | 2.87E-03 | up   |
| BCL9L     | ENSG0000018617 | protein_coding;prc  | 0.4453   | 0.2132   | 2.09 | 1.06  | 2.88E-03 | up   |
| SLFN13    | ENSG0000015476 | retained_intron;no  | 25.5780  | 18.6769  | 1.37 | 0.45  | 2.89E-03 | up   |
| RBM4B     | ENSG0000017391 | protein_coding;no   | 7.9053   | 4.9651   | 1.59 | 0.67  | 2.91E-03 | up   |
| LINC01268 | ENSG0000022750 | lincRNA             | 0.8822   | 1.7701   | 0.50 | -1.00 | 2.94E-03 | down |
| PDK1      | ENSG0000015225 | protein_coding;ret  | 2.9003   | 4.0768   | 0.71 | -0.49 | 2.97E-03 | down |
| SYNCRIP   | ENSG0000013531 | protein_coding      | 35.3741  | 48.0206  | 0.74 | -0.44 | 2.99E-03 | down |
| POMGNT1   | ENSG0000008599 | protein_coding;prc  | 1.4439   | 2.4936   | 0.58 | -0.79 | 2.99E-03 | down |
| NUCB1     | ENSG0000010480 | protein_coding;ret  | 25.0882  | 17.8882  | 1.40 | 0.49  | 3.01E-03 | up   |
| C1orf54   | ENSG0000011829 | protein_coding      | 0.4997   | 1.2398   | 0.40 | -1.31 | 3.02E-03 | down |

|             |                |                     |          |          |       |       |          |      |
|-------------|----------------|---------------------|----------|----------|-------|-------|----------|------|
| KCTD21      | ENSG0000018899 | protein_coding      | 0.5718   | 0.2299   | 2.49  | 1.31  | 3.03E-03 | up   |
| MELTF-AS1   | ENSG0000022810 | antisense           | 1.5215   | 0.5975   | 2.55  | 1.35  | 3.03E-03 | up   |
| AC005837    | ENSG0000026133 | antisense           | 0.4916   | 0.1662   | 2.96  | 1.56  | 3.05E-03 | up   |
| AGRN        | ENSG0000018815 | retained_intron;pr  | 0.7031   | 0.3814   | 1.84  | 0.88  | 3.05E-03 | up   |
| FGD3        | ENSG0000012708 | nonsense_mediate    | 3.6229   | 2.2617   | 1.60  | 0.68  | 3.06E-03 | up   |
| ARG1        | ENSG0000011852 | protein_coding;pr   | 13.9829  | 8.9597   | 1.56  | 0.64  | 3.07E-03 | up   |
| PLP2        | ENSG0000010200 | protein_coding      | 93.7348  | 67.5659  | 1.39  | 0.47  | 3.07E-03 | up   |
| ELOC        | ENSG0000015458 | protein_coding      | 7.5834   | 10.7064  | 0.71  | -0.50 | 3.09E-03 | down |
| UPB1        | ENSG0000010002 | nonsense_mediate    | 0.4109   | 0.1865   | 2.20  | 1.14  | 3.09E-03 | up   |
| SPIN1       | ENSG0000010672 | processed_transcri  | 7.1905   | 2.9547   | 2.43  | 1.28  | 3.10E-03 | up   |
| ADAM9       | ENSG0000016861 | protein_coding;no   | 12.3042  | 8.8933   | 1.38  | 0.47  | 3.10E-03 | up   |
| ORAI3       | ENSG0000017593 | protein_coding;no   | 1.1980   | 3.4002   | 0.35  | -1.50 | 3.12E-03 | down |
| FKTN        | ENSG0000010669 | protein_coding;no   | 0.6855   | 1.8589   | 0.37  | -1.44 | 3.12E-03 | down |
| ARHGAP11    | ENSG0000019882 | protein_coding;pr   | 2.4540   | 3.9546   | 0.62  | -0.69 | 3.13E-03 | down |
| GPR84       | ENSG0000013957 | protein_coding      | 3.7484   | 2.0524   | 1.83  | 0.87  | 3.14E-03 | up   |
| C7orf31     | ENSG0000015379 | protein_coding      | 0.7320   | 1.3822   | 0.53  | -0.92 | 3.16E-03 | down |
| RPL7P1      | ENSG0000021448 | processed_pseudo    | 428.7221 | 582.8413 | 0.74  | -0.44 | 3.20E-03 | down |
| ZNF629      | ENSG0000010287 | protein_coding      | 1.0466   | 1.8246   | 0.57  | -0.80 | 3.22E-03 | down |
| C21orf59-TC | ENSG0000026559 | protein_coding      | 3.3166   | 0.1347   | 24.62 | 4.62  | 3.22E-03 | up   |
| AL135905    | ENSG0000028597 | protein_coding      | 3.5823   | 5.6494   | 0.63  | -0.66 | 3.23E-03 | down |
| TCAM1P      | ENSG0000024028 | processed_transcri  | 2.2956   | 1.1294   | 2.03  | 1.02  | 3.24E-03 | up   |
| LRRC37B     | ENSG0000018515 | protein_coding;ret  | 1.8159   | 3.0905   | 0.59  | -0.77 | 3.24E-03 | down |
| GLCE        | ENSG0000013860 | protein_coding;pr   | 1.4810   | 0.7944   | 1.86  | 0.90  | 3.26E-03 | up   |
| MAP4K1      | ENSG0000010481 | protein_coding;ret  | 0.1699   | 0.4071   | 0.42  | -1.26 | 3.27E-03 | down |
| CSKMT       | ENSG0000021475 | protein_coding;pr   | 0.3465   | 1.0511   | 0.33  | -1.60 | 3.28E-03 | down |
| PMAIP1      | ENSG0000014168 | protein_coding;ret  | 15.4828  | 28.5624  | 0.54  | -0.88 | 3.28E-03 | down |
| SNRNP25     | ENSG0000016198 | retained_intron;pr  | 20.7770  | 14.5209  | 1.43  | 0.52  | 3.29E-03 | up   |
| ZNF641      | ENSG0000016752 | protein_coding;ret  | 1.7912   | 0.6662   | 2.69  | 1.43  | 3.29E-03 | up   |
| TUBB4B      | ENSG0000018822 | protein_coding;ret  | 78.7733  | 56.7405  | 1.39  | 0.47  | 3.30E-03 | up   |
| SMN2        | ENSG0000020557 | protein_coding;ret  | 7.2221   | 12.9478  | 0.56  | -0.84 | 3.30E-03 | down |
| PRADC1      | ENSG0000013561 | protein_coding;pr   | 13.8255  | 8.5578   | 1.62  | 0.69  | 3.31E-03 | up   |
| FN3KRP      | ENSG0000014156 | protein_coding;ret  | 12.8059  | 8.5082   | 1.51  | 0.59  | 3.32E-03 | up   |
| LMO2        | ENSG0000013536 | protein_coding;ret  | 17.4875  | 32.8872  | 0.53  | -0.91 | 3.34E-03 | down |
| SFMBT2      | ENSG0000019887 | protein_coding      | 1.3841   | 2.1770   | 0.64  | -0.65 | 3.34E-03 | down |
| AL591848    | ENSG0000026085 | lincRNA             | 0.6911   | 0.2871   | 2.41  | 1.27  | 3.36E-03 | up   |
| TULP3       | ENSG0000007824 | protein_coding;no   | 2.9407   | 1.5777   | 1.86  | 0.90  | 3.36E-03 | up   |
| SSR4        | ENSG0000018087 | processed_transcri  | 27.3504  | 19.8133  | 1.38  | 0.47  | 3.36E-03 | up   |
| SATB1-AS1   | ENSG0000022895 | antisense;retained_ | 0.1789   | 0.0791   | 2.26  | 1.18  | 3.40E-03 | up   |
| COPS8       | ENSG0000019861 | protein_coding;ret  | 5.4086   | 8.6126   | 0.63  | -0.67 | 3.42E-03 | down |
| CARD16      | ENSG0000020439 | protein_coding;ret  | 2.1585   | 3.8901   | 0.55  | -0.85 | 3.43E-03 | down |
| ASNS        | ENSG0000007066 | protein_coding;ret  | 20.0390  | 27.3172  | 0.73  | -0.45 | 3.44E-03 | down |
| IBTK        | ENSG0000000570 | retained_intron;pr  | 6.7650   | 9.3725   | 0.72  | -0.47 | 3.46E-03 | down |
| AAGAB       | ENSG0000010359 | processed_transcri  | 8.4231   | 12.3542  | 0.68  | -0.55 | 3.47E-03 | down |
| SH3D21      | ENSG0000021419 | protein_coding;no   | 0.2044   | 0.0737   | 2.77  | 1.47  | 3.48E-03 | up   |
| HDGFL3      | ENSG0000016650 | protein_coding;ret  | 0.1736   | 0.0737   | 2.36  | 1.24  | 3.50E-03 | up   |
| MSRB3       | ENSG0000017409 | protein_coding;pr   | 6.8092   | 13.7613  | 0.49  | -1.02 | 3.52E-03 | down |
| PTGR1       | ENSG0000010685 | nonsense_mediate    | 4.8079   | 2.9890   | 1.61  | 0.69  | 3.52E-03 | up   |
| ERO1B       | ENSG0000008661 | protein_coding      | 0.3919   | 0.1594   | 2.46  | 1.30  | 3.52E-03 | up   |

|           |                |                     |          |         |      |       |          |      |
|-----------|----------------|---------------------|----------|---------|------|-------|----------|------|
| DNAJB5    | ENSG0000013709 | retained_intron;pro | 0.3241   | 0.1343  | 2.41 | 1.27  | 3.53E-03 | up   |
| GSN       | ENSG0000014818 | protein_coding;no   | 11.6699  | 8.4559  | 1.38 | 0.46  | 3.53E-03 | up   |
| AARS      | ENSG0000009086 | protein_coding;ret  | 51.2754  | 69.6356 | 0.74 | -0.44 | 3.56E-03 | down |
| NOMO1     | ENSG0000010351 | protein_coding;ret  | 19.0838  | 13.4583 | 1.42 | 0.50  | 3.57E-03 | up   |
| DHRS1     | ENSG0000015737 | nonsense_mediate    | 3.8035   | 2.2716  | 1.67 | 0.74  | 3.57E-03 | up   |
| AL354740  | ENSG0000022533 | retained_intron;an  | 0.0884   | 4.7479  | 0.02 | -5.75 | 3.61E-03 | down |
| RPS3AP26  | ENSG0000021438 | processed_pseudo;   | 60.7986  | 85.9003 | 0.71 | -0.50 | 3.65E-03 | down |
| CAMLG     | ENSG0000016461 | protein_coding      | 5.9832   | 9.6362  | 0.62 | -0.69 | 3.66E-03 | down |
| RGL4      | ENSG0000015949 | protein_coding;no   | 2.1086   | 3.4136  | 0.62 | -0.69 | 3.67E-03 | down |
| NMI       | ENSG0000012360 | protein_coding;ret  | 15.6040  | 21.4959 | 0.73 | -0.46 | 3.68E-03 | down |
| STK39     | ENSG0000019864 | protein_coding;pro  | 2.4488   | 4.0063  | 0.61 | -0.71 | 3.69E-03 | down |
| GAREM2    | ENSG0000015783 | protein_coding;pro  | 0.4293   | 0.1980  | 2.17 | 1.12  | 3.70E-03 | up   |
| PAIP2B    | ENSG0000012437 | protein_coding      | 0.2712   | 0.1027  | 2.64 | 1.40  | 3.72E-03 | up   |
| MAEA      | ENSG0000009031 | protein_coding;no   | 5.5829   | 7.7249  | 0.72 | -0.47 | 3.73E-03 | down |
| ELOB      | ENSG0000010336 | protein_coding      | 100.3485 | 73.7563 | 1.36 | 0.44  | 3.73E-03 | up   |
| AC091057  | ENSG0000026993 | lincRNA             | 1.0142   | 2.3041  | 0.44 | -1.18 | 3.76E-03 | down |
| TRIOBP    | ENSG0000010010 | protein_coding;ret  | 2.1127   | 1.3497  | 1.57 | 0.65  | 3.77E-03 | up   |
| PLS1      | ENSG0000012075 | protein_coding;ret  | 2.9514   | 1.8312  | 1.61 | 0.69  | 3.79E-03 | up   |
| CYBA      | ENSG0000005152 | protein_coding;ret  | 25.7398  | 18.5897 | 1.38 | 0.47  | 3.82E-03 | up   |
| TRIM6     | ENSG0000012123 | protein_coding;pro  | 2.2376   | 1.1630  | 1.92 | 0.94  | 3.83E-03 | up   |
| OLMALINC  | ENSG0000023582 | lincRNA             | 0.2220   | 0.5120  | 0.43 | -1.21 | 3.88E-03 | down |
| ITM2B     | ENSG0000013615 | protein_coding;no   | 22.8185  | 15.8417 | 1.44 | 0.53  | 3.88E-03 | up   |
| BAIAP2-DT | ENSG0000022613 | lincRNA             | 0.4350   | 0.9162  | 0.47 | -1.07 | 3.89E-03 | down |
| LIPA      | ENSG0000010779 | protein_coding;pro  | 2.6272   | 4.1828  | 0.63 | -0.67 | 3.91E-03 | down |
| CPEB2     | ENSG0000013744 | protein_coding;ret  | 0.5985   | 1.3206  | 0.45 | -1.14 | 3.94E-03 | down |
| STK24     | ENSG0000010257 | protein_coding;pro  | 4.1398   | 2.7725  | 1.49 | 0.58  | 3.94E-03 | up   |
| MGAT5     | ENSG0000015212 | protein_coding;pro  | 1.9231   | 3.6232  | 0.53 | -0.91 | 3.94E-03 | down |
| HSPA1A    | ENSG0000020438 | protein_coding      | 1.7495   | 0.9012  | 1.94 | 0.96  | 3.95E-03 | up   |
| CBX2      | ENSG0000017389 | protein_coding;ret  | 0.7870   | 0.4085  | 1.93 | 0.95  | 3.95E-03 | up   |
| TSPAN2    | ENSG0000013419 | protein_coding;pro  | 3.2632   | 5.3284  | 0.61 | -0.71 | 3.96E-03 | down |
| HEATR5B   | ENSG0000000886 | protein_coding;ret  | 6.2194   | 8.4456  | 0.74 | -0.44 | 3.97E-03 | down |
| HOMER3    | ENSG0000005112 | protein_coding;ret  | 9.1184   | 13.0035 | 0.70 | -0.51 | 3.98E-03 | down |
| LINC01215 | ENSG0000027185 | lincRNA             | 10.6833  | 7.0391  | 1.52 | 0.60  | 4.00E-03 | up   |
| TRPS1     | ENSG0000010444 | protein_coding      | 0.4556   | 0.2246  | 2.03 | 1.02  | 4.01E-03 | up   |
| RPL13AP25 | ENSG0000013614 | processed_pseudo;   | 50.4821  | 72.6560 | 0.69 | -0.53 | 4.03E-03 | down |
| GM2A      | ENSG0000019674 | protein_coding      | 15.2103  | 20.6025 | 0.74 | -0.44 | 4.03E-03 | down |
| RCAN3     | ENSG0000011760 | protein_coding;no   | 0.4123   | 0.1891  | 2.18 | 1.12  | 4.03E-03 | up   |
| FAM72B    | ENSG0000018861 | protein_coding;pro  | 5.6281   | 8.9641  | 0.63 | -0.67 | 4.04E-03 | down |
| PARD3     | ENSG0000014849 | protein_coding;ret  | 0.8359   | 0.4467  | 1.87 | 0.90  | 4.05E-03 | up   |
| UBE2W     | ENSG0000010434 | nonsense_mediate    | 3.8320   | 5.3637  | 0.71 | -0.49 | 4.06E-03 | down |
| ATP6V0E2  | ENSG0000017113 | protein_coding;pro  | 0.5835   | 0.2771  | 2.11 | 1.07  | 4.09E-03 | up   |
| LAMP1     | ENSG0000018589 | protein_coding;ret  | 22.5459  | 15.7211 | 1.43 | 0.52  | 4.11E-03 | up   |
| QPCT      | ENSG0000011582 | protein_coding;ret  | 3.2335   | 1.7818  | 1.81 | 0.86  | 4.12E-03 | up   |
| SNHG4     | ENSG0000028139 | lincRNA             | 6.2555   | 8.9503  | 0.70 | -0.52 | 4.13E-03 | down |
| TIMELESS  | ENSG0000011160 | protein_coding;ret  | 19.4571  | 14.3441 | 1.36 | 0.44  | 4.13E-03 | up   |
| AC112128  | ENSG0000028594 | nonsense_mediate    | 0.2433   | 0.8256  | 0.29 | -1.76 | 4.13E-03 | down |
| TBL1XR1   | ENSG0000017756 | nonsense_mediate    | 6.2771   | 8.6276  | 0.73 | -0.46 | 4.13E-03 | down |
| LETMD1    | ENSG0000005042 | nonsense_mediate    | 10.2589  | 13.8492 | 0.74 | -0.43 | 4.14E-03 | down |

|          |                |                     |          |          |      |       |          |      |
|----------|----------------|---------------------|----------|----------|------|-------|----------|------|
| ERG28    | ENSG0000013393 | protein_coding      | 14.8311  | 9.9787   | 1.49 | 0.57  | 4.16E-03 | up   |
| AUXG0100 | ENSG0000028621 | antisense           | 0.1109   | 0.0337   | 3.29 | 1.72  | 4.17E-03 | up   |
| SLC25A32 | ENSG0000016493 | protein_coding;no   | 5.6763   | 8.9748   | 0.63 | -0.66 | 4.19E-03 | down |
| PRELID1  | ENSG0000016923 | protein_coding;no   | 30.8111  | 44.7576  | 0.69 | -0.54 | 4.19E-03 | down |
| ZWINT    | ENSG0000012295 | retained_intron;no  | 41.7176  | 30.4899  | 1.37 | 0.45  | 4.20E-03 | up   |
| C2CD3    | ENSG0000016801 | protein_coding;pro  | 2.3720   | 1.5524   | 1.53 | 0.61  | 4.20E-03 | up   |
| CNTNAP4  | ENSG0000015291 | protein_coding;ret  | 2.0799   | 3.1831   | 0.65 | -0.61 | 4.20E-03 | down |
| SDF2L1   | ENSG0000012822 | protein_coding;ret  | 13.0808  | 7.8418   | 1.67 | 0.74  | 4.25E-03 | up   |
| CD300LB  | ENSG0000017878 | protein_coding      | 6.0957   | 3.8347   | 1.59 | 0.67  | 4.26E-03 | up   |
| ATXN7    | ENSG0000016363 | protein_coding;ret  | 1.5616   | 0.8677   | 1.80 | 0.85  | 4.27E-03 | up   |
| TMEM260  | ENSG0000007026 | protein_coding;no   | 1.2996   | 2.1436   | 0.61 | -0.72 | 4.29E-03 | down |
| FAM161A  | ENSG0000017026 | protein_coding;ret  | 2.1327   | 1.2590   | 1.69 | 0.76  | 4.32E-03 | up   |
| ACSL1    | ENSG0000015172 | protein_coding;ret  | 15.9965  | 22.9377  | 0.70 | -0.52 | 4.32E-03 | down |
| ATP10D   | ENSG0000014524 | protein_coding;no   | 1.6768   | 0.9314   | 1.80 | 0.85  | 4.33E-03 | up   |
| FBXO36   | ENSG0000015383 | protein_coding;ret  | 0.0925   | 0.2627   | 0.35 | -1.51 | 4.33E-03 | down |
| ZNF578   | ENSG0000025840 | protein_coding;pro  | 0.3563   | 0.1732   | 2.06 | 1.04  | 4.35E-03 | up   |
| CHST4    | ENSG0000014083 | protein_coding;ret  | 1.0524   | 0.4927   | 2.14 | 1.10  | 4.41E-03 | up   |
| PRKCQ-AS | ENSG0000023794 | lincRNA;retained_   | 0.3604   | 0.8140   | 0.44 | -1.18 | 4.46E-03 | down |
| AC007342 | ENSG0000026007 | retained_intron;tra | 0.7466   | 0.3573   | 2.09 | 1.06  | 4.48E-03 | up   |
| NACA     | ENSG0000019653 | protein_coding;pro  | 46.6991  | 62.8705  | 0.74 | -0.43 | 4.52E-03 | down |
| SLU7     | ENSG0000016460 | protein_coding;ret  | 9.4013   | 12.9852  | 0.72 | -0.47 | 4.52E-03 | down |
| LIMS1    | ENSG0000016975 | protein_coding;pro  | 3.5845   | 2.2388   | 1.60 | 0.68  | 4.53E-03 | up   |
| RPL24    | ENSG0000011439 | protein_coding;ret  | 208.4791 | 284.3784 | 0.73 | -0.45 | 4.53E-03 | down |
| RPL9     | ENSG0000016368 | protein_coding;ret  | 210.4929 | 284.2054 | 0.74 | -0.43 | 4.55E-03 | down |
| SMCHD1   | ENSG0000010159 | nonsense_mediate    | 19.4599  | 26.3996  | 0.74 | -0.44 | 4.56E-03 | down |
| FKBP2    | ENSG0000017348 | nonsense_mediate    | 14.5527  | 9.2280   | 1.58 | 0.66  | 4.57E-03 | up   |
| UNC13B   | ENSG0000019872 | protein_coding;pro  | 1.4359   | 0.9305   | 1.54 | 0.63  | 4.57E-03 | up   |
| CALHM2   | ENSG0000013817 | processed_transcri  | 1.5045   | 2.6557   | 0.57 | -0.82 | 4.59E-03 | down |
| PLD4     | ENSG0000016642 | protein_coding;ret  | 0.0901   | 0.2668   | 0.34 | -1.57 | 4.59E-03 | down |
| XKR3     | ENSG0000017296 | protein_coding      | 0.6679   | 0.2339   | 2.85 | 1.51  | 4.60E-03 | up   |
| AIG1     | ENSG0000014641 | protein_coding;ret  | 11.4561  | 15.3239  | 0.75 | -0.42 | 4.64E-03 | down |
| ATL3     | ENSG0000018474 | protein_coding;pro  | 9.9654   | 13.3283  | 0.75 | -0.42 | 4.64E-03 | down |
| AC092683 | ENSG0000023060 | lincRNA             | 2.0833   | 1.1602   | 1.80 | 0.84  | 4.66E-03 | up   |
| LRRC25   | ENSG0000017548 | protein_coding      | 3.8995   | 2.2587   | 1.73 | 0.79  | 4.68E-03 | up   |
| KRT8     | ENSG0000017042 | retained_intron;pro | 0.1930   | 0.0480   | 4.02 | 2.01  | 4.70E-03 | up   |
| TMEM147  | ENSG0000010567 | protein_coding;ret  | 33.2400  | 23.6488  | 1.41 | 0.49  | 4.70E-03 | up   |
| HNRNPA1P | ENSG0000021549 | processed_pseudo    | 19.4050  | 38.6943  | 0.50 | -1.00 | 4.71E-03 | down |
| WDR54    | ENSG0000000544 | protein_coding;ret  | 0.4772   | 1.0090   | 0.47 | -1.08 | 4.72E-03 | down |
| ARF6     | ENSG0000016552 | protein_coding      | 15.2586  | 20.7689  | 0.73 | -0.44 | 4.73E-03 | down |
| P2RY1    | ENSG0000016986 | protein_coding      | 0.5117   | 0.2286   | 2.24 | 1.16  | 4.74E-03 | up   |
| AIDA     | ENSG0000018606 | processed_transcri  | 2.0247   | 5.3021   | 0.38 | -1.39 | 4.74E-03 | down |
| ARHGAP33 | ENSG0000000477 | protein_coding;pro  | 1.1172   | 0.5831   | 1.92 | 0.94  | 4.75E-03 | up   |
| IPCEF1   | ENSG0000007470 | protein_coding;pro  | 2.7829   | 4.0241   | 0.69 | -0.53 | 4.77E-03 | down |
| YPEL3    | ENSG0000009023 | protein_coding;pro  | 0.6108   | 0.2672   | 2.29 | 1.19  | 4.79E-03 | up   |
| AHCYL2   | ENSG0000015846 | protein_coding;ret  | 1.5240   | 0.7303   | 2.09 | 1.06  | 4.83E-03 | up   |
| TSPAN17  | ENSG0000004814 | protein_coding;no   | 0.1842   | 0.4115   | 0.45 | -1.16 | 4.84E-03 | down |
| SKA2     | ENSG0000018262 | protein_coding;no   | 6.8294   | 10.0882  | 0.68 | -0.56 | 4.85E-03 | down |
| PODXL2   | ENSG0000011463 | protein_coding      | 31.7327  | 22.9563  | 1.38 | 0.47  | 4.85E-03 | up   |

|          |                                    |          |          |      |       |          |      |
|----------|------------------------------------|----------|----------|------|-------|----------|------|
| TRGJP1   | ENSG0000021169.TR_J_gene           | 7.0338   | 17.0903  | 0.41 | -1.28 | 4.90E-03 | down |
| MCM8     | ENSG0000012588.protein_coding      | 14.0778  | 10.4432  | 1.35 | 0.43  | 4.91E-03 | up   |
| CRNKL1   | ENSG0000010134.protein_coding;ret  | 5.4527   | 7.8794   | 0.69 | -0.53 | 4.92E-03 | down |
| NPL      | ENSG0000013583.protein_coding;pro  | 7.6125   | 5.2504   | 1.45 | 0.54  | 4.93E-03 | up   |
| TIMM8A   | ENSG0000012695.protein_coding;no   | 5.8900   | 3.0593   | 1.93 | 0.95  | 4.93E-03 | up   |
| CENPE    | ENSG0000013877.protein_coding;ret  | 4.1760   | 5.8043   | 0.72 | -0.47 | 4.93E-03 | down |
| FAM184A  | ENSG0000011187.protein_coding;no   | 0.2595   | 0.1130   | 2.30 | 1.20  | 4.94E-03 | up   |
| MAFG     | ENSG0000019706.protein_coding      | 5.5140   | 11.6086  | 0.47 | -1.07 | 4.94E-03 | down |
| TCP11L2  | ENSG0000016604.protein_coding;no   | 0.3890   | 0.1664   | 2.34 | 1.22  | 4.97E-03 | up   |
| HSP90B1  | ENSG0000016659.retained_intron;pro | 205.3703 | 150.1819 | 1.37 | 0.45  | 4.98E-03 | up   |
| KCNJ15   | ENSG0000015755.protein_coding;pro  | 0.1594   | 0.0647   | 2.46 | 1.30  | 4.98E-03 | up   |
| SEPT5    | ENSG0000018470.protein_coding;ret  | 2.6509   | 0.8936   | 2.97 | 1.57  | 5.02E-03 | up   |
| EIF4A2   | ENSG0000015697.protein_coding;ret  | 32.7552  | 44.4000  | 0.74 | -0.44 | 5.05E-03 | down |
| NIPA2    | ENSG0000014015.protein_coding;pro  | 9.4134   | 15.5162  | 0.61 | -0.72 | 5.06E-03 | down |
| AC002350 | ENSG0000027899.TEC                 | 1.5236   | 0.7187   | 2.12 | 1.08  | 5.06E-03 | up   |
| RPL32P29 | ENSG0000024427.processed_pseudo;   | 17.4249  | 29.4429  | 0.59 | -0.76 | 5.06E-03 | down |
| SLC19A2  | ENSG0000011747.protein_coding;ret  | 4.4705   | 8.7680   | 0.51 | -0.97 | 5.06E-03 | down |
| PHLDA1   | ENSG0000013928.protein_coding      | 1.3231   | 0.7874   | 1.68 | 0.75  | 5.09E-03 | up   |
| PCK2     | ENSG0000010088.protein_coding;ret  | 1.1384   | 2.0106   | 0.57 | -0.82 | 5.13E-03 | down |
| AC073896 | ENSG0000014478.protein_coding      | 0.3584   | 2.5816   | 0.14 | -2.85 | 5.13E-03 | down |
| PRDX5    | ENSG0000012643.protein_coding      | 207.1167 | 153.4771 | 1.35 | 0.43  | 5.14E-03 | up   |
| PON2     | ENSG0000010585.protein_coding;pro  | 3.4116   | 2.0712   | 1.65 | 0.72  | 5.14E-03 | up   |
| AC079684 | ENSG0000027494.sense_intronic      | 1.4610   | 3.5626   | 0.41 | -1.29 | 5.15E-03 | down |
| RARG     | ENSG0000017281.processed_transcri  | 0.2135   | 0.0757   | 2.82 | 1.50  | 5.16E-03 | up   |
| CD74     | ENSG0000001958.protein_coding;ret  | 6.6363   | 9.7352   | 0.68 | -0.55 | 5.16E-03 | down |
| CENPM    | ENSG0000010016.protein_coding;ret  | 18.8255  | 12.5966  | 1.49 | 0.58  | 5.18E-03 | up   |
| NSRP1    | ENSG0000012665.protein_coding;pro  | 4.6334   | 6.8740   | 0.67 | -0.57 | 5.18E-03 | down |
| SLC39A7  | ENSG0000011247.processed_transcri  | 46.9875  | 34.6369  | 1.36 | 0.44  | 5.19E-03 | up   |
| ZNF618   | ENSG0000015765.protein_coding;pro  | 0.0431   | 0.1214   | 0.36 | -1.49 | 5.19E-03 | down |
| FAM229B  | ENSG0000020377.protein_coding      | 1.0375   | 0.4130   | 2.51 | 1.33  | 5.21E-03 | up   |
| IFRD2    | ENSG0000021470.retained_intron;no  | 8.9092   | 12.4980  | 0.71 | -0.49 | 5.22E-03 | down |
| GUSB     | ENSG0000016991.protein_coding;no   | 33.5861  | 24.4456  | 1.37 | 0.46  | 5.23E-03 | up   |
| AC093525 | ENSG0000026161.antisense           | 1.0925   | 0.5070   | 2.15 | 1.11  | 5.25E-03 | up   |
| MATR3    | ENSG0000028098.protein_coding      | 19.9171  | 30.9466  | 0.64 | -0.64 | 5.26E-03 | down |
| PTMA     | ENSG0000018751.processed_transcri  | 517.6337 | 373.4743 | 1.39 | 0.47  | 5.28E-03 | up   |
| ICE2     | ENSG0000012891.retained_intron;pro | 1.8498   | 2.8142   | 0.66 | -0.61 | 5.29E-03 | down |
| FAM117B  | ENSG0000013843.protein_coding;ret  | 0.6066   | 1.0623   | 0.57 | -0.81 | 5.30E-03 | down |
| MBNL1    | ENSG0000015260.protein_coding;ret  | 24.4655  | 33.8414  | 0.72 | -0.47 | 5.34E-03 | down |
| TMEM87A  | ENSG0000010397.protein_coding;ret  | 9.9025   | 13.3164  | 0.74 | -0.43 | 5.36E-03 | down |
| S100A11  | ENSG0000016319.protein_coding;pro  | 339.9764 | 253.6510 | 1.34 | 0.42  | 5.37E-03 | up   |
| GRN      | ENSG0000003058.retained_intron;pro | 69.0630  | 50.8325  | 1.36 | 0.44  | 5.37E-03 | up   |
| DNAJC14  | ENSG0000013539.protein_coding      | 7.4904   | 5.0222   | 1.49 | 0.58  | 5.39E-03 | up   |
| MYC      | ENSG0000013699.protein_coding;pro  | 9.2778   | 4.3276   | 2.14 | 1.10  | 5.40E-03 | up   |
| ZNF236   | ENSG0000013085.protein_coding;no   | 1.6741   | 1.0362   | 1.62 | 0.69  | 5.40E-03 | up   |
| MAN2B2   | ENSG0000001328.protein_coding;pro  | 3.9364   | 2.5534   | 1.54 | 0.62  | 5.40E-03 | up   |
| MGAM2    | ENSG0000025774.protein_coding;ret  | 0.3763   | 0.1817   | 2.07 | 1.05  | 5.42E-03 | up   |
| NOP53    | ENSG0000010537.retained_intron;pro | 29.1146  | 39.1270  | 0.74 | -0.43 | 5.44E-03 | down |
| AC092718 | ENSG0000026106.sense_intronic      | 2.9436   | 5.5400   | 0.53 | -0.91 | 5.45E-03 | down |

|            |                |                     |          |          |      |       |          |      |
|------------|----------------|---------------------|----------|----------|------|-------|----------|------|
| AL008721   | ENSG0000027297 | sense_intronic      | 1.1792   | 0.6081   | 1.94 | 0.96  | 5.49E-03 | up   |
| PSMD12     | ENSG0000019717 | retained_intron;pro | 12.7417  | 17.0863  | 0.75 | -0.42 | 5.49E-03 | down |
| CDC42EP3   | ENSG0000016317 | protein_coding;ret  | 4.1397   | 6.2567   | 0.66 | -0.60 | 5.52E-03 | down |
| EHD4       | ENSG0000010396 | protein_coding;ret  | 0.6602   | 0.3586   | 1.84 | 0.88  | 5.53E-03 | up   |
| ME1        | ENSG0000006583 | protein_coding      | 0.6083   | 1.1567   | 0.53 | -0.93 | 5.54E-03 | down |
| SNX16      | ENSG0000010449 | protein_coding;ret  | 1.3114   | 2.2162   | 0.59 | -0.76 | 5.55E-03 | down |
| ZNF652     | ENSG0000019874 | protein_coding;no   | 1.6010   | 0.8801   | 1.82 | 0.86  | 5.56E-03 | up   |
| LRP1       | ENSG0000012338 | protein_coding;ret  | 0.3000   | 0.1521   | 1.97 | 0.98  | 5.56E-03 | up   |
| ACADM      | ENSG0000011705 | protein_coding;ret  | 14.6832  | 19.8530  | 0.74 | -0.44 | 5.57E-03 | down |
| FAM206A    | ENSG0000011932 | protein_coding;pro  | 11.5273  | 16.1856  | 0.71 | -0.49 | 5.60E-03 | down |
| METTL4     | ENSG0000010157 | protein_coding;ret  | 3.4823   | 5.6232   | 0.62 | -0.69 | 5.60E-03 | down |
| ADGRE1     | ENSG0000017483 | protein_coding;pro  | 5.1594   | 3.3261   | 1.55 | 0.63  | 5.61E-03 | up   |
| CCT4       | ENSG0000011548 | protein_coding;pro  | 89.7494  | 119.2071 | 0.75 | -0.41 | 5.63E-03 | down |
| PRDM5      | ENSG0000013873 | protein_coding;pro  | 0.8569   | 0.4784   | 1.79 | 0.84  | 5.66E-03 | up   |
| DPH5       | ENSG0000011754 | processed_transcri  | 7.7657   | 11.5352  | 0.67 | -0.57 | 5.68E-03 | down |
| ASB16-AS1  | ENSG0000026708 | antisense           | 1.7573   | 0.8159   | 2.15 | 1.11  | 5.69E-03 | up   |
| HAX1       | ENSG0000014357 | retained_intron;pro | 24.6714  | 33.2469  | 0.74 | -0.43 | 5.70E-03 | down |
| CACNA2D3   | ENSG0000015744 | protein_coding;ret  | 1.5976   | 2.5844   | 0.62 | -0.69 | 5.72E-03 | down |
| RFWD3      | ENSG0000016841 | protein_coding;ret  | 12.8047  | 17.0535  | 0.75 | -0.41 | 5.72E-03 | down |
| JUN        | ENSG0000017760 | protein_coding      | 6.0574   | 9.2075   | 0.66 | -0.60 | 5.73E-03 | down |
| RPL9P7     | ENSG0000023810 | processed_pseudo    | 351.2708 | 489.8172 | 0.72 | -0.48 | 5.75E-03 | down |
| CCT6B      | ENSG0000013214 | retained_intron;pro | 0.1623   | 0.3879   | 0.42 | -1.26 | 5.78E-03 | down |
| UTRN       | ENSG0000015281 | protein_coding;pro  | 1.9618   | 2.7897   | 0.70 | -0.51 | 5.81E-03 | down |
| TRAK2      | ENSG0000011599 | protein_coding;ret  | 5.2910   | 3.7681   | 1.40 | 0.49  | 5.86E-03 | up   |
| HHEX       | ENSG0000015280 | protein_coding;ret  | 14.9960  | 9.6477   | 1.55 | 0.64  | 5.88E-03 | up   |
| JAK1       | ENSG0000016243 | protein_coding;pro  | 15.6528  | 11.7136  | 1.34 | 0.42  | 5.92E-03 | up   |
| ADK        | ENSG0000015611 | protein_coding;pro  | 13.6527  | 18.9301  | 0.72 | -0.47 | 5.94E-03 | down |
| ANKRD23    | ENSG0000016312 | protein_coding;pro  | 0.2848   | 0.1009   | 2.82 | 1.50  | 5.96E-03 | up   |
| CCDC137    | ENSG0000018529 | nonsense_mediate    | 13.6548  | 6.6252   | 2.06 | 1.04  | 6.02E-03 | up   |
| BNIP2      | ENSG0000014029 | protein_coding;ret  | 8.9157   | 11.9351  | 0.75 | -0.42 | 6.03E-03 | down |
| NDUFAF4    | ENSG0000012354 | processed_transcri  | 6.6022   | 9.9204   | 0.67 | -0.59 | 6.06E-03 | down |
| WBP1       | ENSG0000023977 | processed_transcri  | 10.0896  | 6.2904   | 1.60 | 0.68  | 6.07E-03 | up   |
| SEMA4A     | ENSG0000019618 | protein_coding;pro  | 3.9398   | 5.6070   | 0.70 | -0.51 | 6.10E-03 | down |
| KIAA0319L  | ENSG0000014268 | protein_coding;pro  | 4.4464   | 3.0904   | 1.44 | 0.52  | 6.12E-03 | up   |
| ADGRG3     | ENSG0000018288 | nonsense_mediate    | 3.8726   | 2.4097   | 1.61 | 0.68  | 6.14E-03 | up   |
| MAN1A2     | ENSG0000019816 | protein_coding;pro  | 3.5554   | 2.4215   | 1.47 | 0.55  | 6.15E-03 | up   |
| GABPB1-AS1 | ENSG0000024487 | antisense           | 0.7598   | 1.2021   | 0.63 | -0.66 | 6.15E-03 | down |
| HELB       | ENSG0000012731 | protein_coding;no   | 0.8554   | 0.3733   | 2.29 | 1.20  | 6.20E-03 | up   |
| RASGRF1    | ENSG0000005833 | protein_coding;pro  | 0.1551   | 0.0554   | 2.80 | 1.48  | 6.20E-03 | up   |
| NRG4       | ENSG0000016975 | nonsense_mediate    | 0.0970   | 0.2401   | 0.40 | -1.31 | 6.21E-03 | down |
| TBRG1      | ENSG0000015414 | nonsense_mediate    | 8.7190   | 5.9042   | 1.48 | 0.56  | 6.21E-03 | up   |
| SLC11A1    | ENSG0000001828 | retained_intron;pro | 0.7197   | 0.3896   | 1.85 | 0.89  | 6.23E-03 | up   |
| AP1G2      | ENSG0000021398 | protein_coding;ret  | 5.8866   | 4.2120   | 1.40 | 0.48  | 6.23E-03 | up   |
| RAB11FIP4  | ENSG0000013124 | protein_coding;pro  | 0.4209   | 0.2401   | 1.75 | 0.81  | 6.26E-03 | up   |
| SLC35B3    | ENSG0000012478 | protein_coding;no   | 4.7687   | 7.3194   | 0.65 | -0.62 | 6.27E-03 | down |
| WWC2       | ENSG0000015171 | protein_coding;ret  | 0.0824   | 0.1853   | 0.44 | -1.17 | 6.28E-03 | down |
| PFN1       | ENSG0000010851 | protein_coding      | 335.5298 | 245.9255 | 1.36 | 0.45  | 6.31E-03 | up   |
| RNASET2    | ENSG0000002629 | nonsense_mediate    | 18.6313  | 13.7009  | 1.36 | 0.44  | 6.36E-03 | up   |

|           |                |                     |          |          |      |       |          |      |
|-----------|----------------|---------------------|----------|----------|------|-------|----------|------|
| AC011815  | ENSG0000026857 | lincRNA             | 3.1882   | 1.9808   | 1.61 | 0.69  | 6.37E-03 | up   |
| DUSP18    | ENSG0000016706 | protein_coding;no   | 0.3437   | 0.1499   | 2.29 | 1.20  | 6.38E-03 | up   |
| HAL       | ENSG0000008411 | protein_coding;no   | 3.3948   | 5.0819   | 0.67 | -0.58 | 6.45E-03 | down |
| KRT18     | ENSG0000011105 | protein_coding;ret  | 0.7574   | 0.2678   | 2.83 | 1.50  | 6.45E-03 | up   |
| RNF145    | ENSG0000014586 | processed_transcri  | 5.1554   | 8.0612   | 0.64 | -0.64 | 6.49E-03 | down |
| PHACTR2   | ENSG0000011241 | protein_coding;ret  | 0.8801   | 0.3572   | 2.46 | 1.30  | 6.49E-03 | up   |
| GNPTAB    | ENSG0000011167 | protein_coding;pro  | 4.1072   | 2.9359   | 1.40 | 0.48  | 6.53E-03 | up   |
| CASP2     | ENSG0000010614 | protein_coding;ret  | 6.7840   | 10.5595  | 0.64 | -0.64 | 6.54E-03 | down |
| ZNF404    | ENSG0000017622 | protein_coding;pro  | 2.9146   | 1.6894   | 1.73 | 0.79  | 6.55E-03 | up   |
| LRRC4     | ENSG0000012859 | protein_coding      | 0.2799   | 0.1157   | 2.42 | 1.27  | 6.57E-03 | up   |
| NOTCH1    | ENSG0000014840 | retained_intron;pro | 1.3375   | 0.8257   | 1.62 | 0.70  | 6.58E-03 | up   |
| COLQ      | ENSG0000020656 | protein_coding;ret  | 0.3458   | 0.7409   | 0.47 | -1.10 | 6.60E-03 | down |
| SLC25A11  | ENSG0000010852 | protein_coding;ret  | 13.5076  | 9.0118   | 1.50 | 0.58  | 6.60E-03 | up   |
| HIST2H2AA | ENSG0000020381 | protein_coding      | 5.3019   | 2.5591   | 2.07 | 1.05  | 6.62E-03 | up   |
| BCL2      | ENSG0000016800 | protein_coding;pro  | 7.7809   | 5.1850   | 1.50 | 0.59  | 6.65E-03 | up   |
| CCDC91    | ENSG0000012310 | protein_coding;no   | 2.5443   | 3.7593   | 0.68 | -0.56 | 6.70E-03 | down |
| RPL23     | ENSG0000012569 | protein_coding;ret  | 166.8114 | 221.1984 | 0.75 | -0.41 | 6.71E-03 | down |
| AC002116  | ENSG0000026769 | antisense           | 2.6824   | 1.2212   | 2.20 | 1.14  | 6.72E-03 | up   |
| OXA1L     | ENSG0000015546 | retained_intron;pro | 49.0334  | 65.6848  | 0.75 | -0.42 | 6.73E-03 | down |
| VAMP1     | ENSG0000013919 | protein_coding;ret  | 10.5084  | 6.9889   | 1.50 | 0.59  | 6.74E-03 | up   |
| ATOX1     | ENSG0000017755 | protein_coding;ret  | 9.5375   | 6.8925   | 1.38 | 0.47  | 6.75E-03 | up   |
| SPECC1L   | ENSG0000010001 | protein_coding;ret  | 7.1918   | 4.5636   | 1.58 | 0.66  | 6.75E-03 | up   |
| MAPK13    | ENSG0000015671 | protein_coding;pro  | 0.7331   | 0.3960   | 1.85 | 0.89  | 6.76E-03 | up   |
| ABCA7     | ENSG0000006468 | protein_coding;ret  | 0.9353   | 0.5413   | 1.73 | 0.79  | 6.77E-03 | up   |
| ZUP1      | ENSG0000015397 | processed_transcri  | 8.3539   | 12.0979  | 0.69 | -0.53 | 6.79E-03 | down |
| TNIK      | ENSG0000015431 | protein_coding;ret  | 0.0836   | 0.0338   | 2.47 | 1.31  | 6.80E-03 | up   |
| THADA     | ENSG0000011597 | protein_coding;ret  | 2.2774   | 3.1786   | 0.72 | -0.48 | 6.81E-03 | down |
| ZNF821    | ENSG0000010298 | protein_coding;pro  | 0.2309   | 0.5529   | 0.42 | -1.26 | 6.82E-03 | down |
| MAN2B1    | ENSG0000010477 | retained_intron;pro | 34.5499  | 25.3265  | 1.36 | 0.45  | 6.84E-03 | up   |
| PCBP1-AS1 | ENSG0000017981 | antisense;lincRNA   | 0.4584   | 0.7110   | 0.64 | -0.63 | 6.84E-03 | down |
| EXOSC8    | ENSG0000012069 | nonsense_mediate    | 17.6078  | 23.8131  | 0.74 | -0.44 | 6.85E-03 | down |
| NDUFA4L2  | ENSG0000018563 | retained_intron;pro | 0.2091   | 0.4705   | 0.44 | -1.17 | 6.86E-03 | down |
| FAM131A   | ENSG0000017518 | protein_coding;pro  | 0.1317   | 0.0550   | 2.40 | 1.26  | 6.91E-03 | up   |
| AC239798  | ENSG0000023457 | lincRNA             | 0.5929   | 1.1191   | 0.53 | -0.92 | 6.94E-03 | down |
| PANX1     | ENSG0000011021 | protein_coding      | 4.1378   | 2.5138   | 1.65 | 0.72  | 6.97E-03 | up   |
| AC127459  | ENSG0000026056 | 3prime_overlappir   | 0.6255   | 1.5347   | 0.41 | -1.29 | 6.99E-03 | down |
| SUGT1P4-S | ENSG0000025487 | processed_transcri  | 0.3021   | 0.6301   | 0.48 | -1.06 | 7.01E-03 | down |
| PYROXD1   | ENSG0000012135 | protein_coding;no   | 7.7246   | 10.9986  | 0.70 | -0.51 | 7.05E-03 | down |
| PRAM1     | ENSG0000013324 | protein_coding;ret  | 33.8532  | 25.0346  | 1.35 | 0.44  | 7.08E-03 | up   |
| RENBP     | ENSG0000010203 | protein_coding;ret  | 4.1106   | 2.3411   | 1.76 | 0.81  | 7.08E-03 | up   |
| PDIA3     | ENSG0000016700 | protein_coding;ret  | 83.1592  | 61.8619  | 1.34 | 0.43  | 7.08E-03 | up   |
| MBOAT7    | ENSG0000012550 | protein_coding;ret  | 8.2193   | 5.8302   | 1.41 | 0.50  | 7.14E-03 | up   |
| NAT1      | ENSG0000017142 | protein_coding;pro  | 1.8655   | 3.3829   | 0.55 | -0.86 | 7.18E-03 | down |
| ERI2      | ENSG0000019667 | retained_intron;pro | 4.1620   | 5.8917   | 0.71 | -0.50 | 7.20E-03 | down |
| HNRNPDL   | ENSG0000015279 | protein_coding;no   | 44.9724  | 59.2495  | 0.76 | -0.40 | 7.21E-03 | down |
| INTS2     | ENSG0000010850 | protein_coding;ret  | 2.7378   | 3.8987   | 0.70 | -0.51 | 7.22E-03 | down |
| TNFSF9    | ENSG0000012565 | protein_coding      | 0.6194   | 1.3147   | 0.47 | -1.09 | 7.24E-03 | down |
| IL1B      | ENSG0000012553 | protein_coding;ret  | 4.3436   | 2.5239   | 1.72 | 0.78  | 7.28E-03 | up   |

|          |                |                     |          |          |      |       |          |      |
|----------|----------------|---------------------|----------|----------|------|-------|----------|------|
| RARS     | ENSG0000011364 | retained_intron;pro | 18.5471  | 24.9446  | 0.74 | -0.43 | 7.28E-03 | down |
| VTA1     | ENSG0000000984 | protein_coding;pro  | 9.9861   | 13.2467  | 0.75 | -0.41 | 7.30E-03 | down |
| ZNF569   | ENSG0000019643 | protein_coding;pro  | 2.0025   | 3.1470   | 0.64 | -0.65 | 7.34E-03 | down |
| USP11    | ENSG0000010222 | protein_coding;ret  | 2.1892   | 1.3546   | 1.62 | 0.69  | 7.35E-03 | up   |
| HAND2    | ENSG0000016410 | protein_coding;pro  | 0.2217   | 0.4901   | 0.45 | -1.14 | 7.39E-03 | down |
| LDLRAD4  | ENSG0000016867 | retained_intron;pro | 0.1992   | 0.3607   | 0.55 | -0.86 | 7.40E-03 | down |
| AIMP2    | ENSG0000010630 | protein_coding;no   | 13.5415  | 19.3035  | 0.70 | -0.51 | 7.43E-03 | down |
| PARVB    | ENSG0000018867 | protein_coding;pro  | 5.8122   | 4.2223   | 1.38 | 0.46  | 7.44E-03 | up   |
| MTA3     | ENSG0000005793 | protein_coding;pro  | 0.4194   | 0.2303   | 1.82 | 0.86  | 7.49E-03 | up   |
| MID1IP1  | ENSG0000016517 | protein_coding      | 11.7457  | 16.7965  | 0.70 | -0.52 | 7.52E-03 | down |
| ARRB2    | ENSG0000014148 | protein_coding;no   | 8.5161   | 5.8775   | 1.45 | 0.53  | 7.53E-03 | up   |
| CKLF-CMT | ENSG0000025478 | nonsense_mediate    | 0.4199   | 0.0534   | 7.86 | 2.97  | 7.54E-03 | up   |
| CMTM3    | ENSG0000014093 | retained_intron;pro | 13.3677  | 9.0039   | 1.48 | 0.57  | 7.55E-03 | up   |
| CDK17    | ENSG0000005975 | protein_coding;ret  | 2.0846   | 3.1737   | 0.66 | -0.61 | 7.56E-03 | down |
| CD9      | ENSG0000001027 | protein_coding;ret  | 0.7648   | 0.3573   | 2.14 | 1.10  | 7.57E-03 | up   |
| CPNE3    | ENSG0000008571 | protein_coding;ret  | 1.6492   | 2.5503   | 0.65 | -0.63 | 7.58E-03 | down |
| UBXN8    | ENSG0000010469 | processed_transcri  | 4.1364   | 6.4331   | 0.64 | -0.64 | 7.59E-03 | down |
| FBXO41   | ENSG0000016301 | protein_coding;ret  | 1.5277   | 3.5664   | 0.43 | -1.22 | 7.60E-03 | down |
| KANTR    | ENSG0000023259 | processed_transcri  | 0.8017   | 0.4535   | 1.77 | 0.82  | 7.66E-03 | up   |
| CD79A    | ENSG0000010536 | protein_coding      | 0.9790   | 0.4049   | 2.42 | 1.27  | 7.66E-03 | up   |
| RAB5B    | ENSG0000011154 | protein_coding;no   | 15.4002  | 24.8414  | 0.62 | -0.69 | 7.67E-03 | down |
| YTHDF3   | ENSG0000018572 | protein_coding;no   | 7.7068   | 4.3444   | 1.77 | 0.83  | 7.69E-03 | up   |
| HSPA5    | ENSG0000004457 | protein_coding      | 193.4971 | 146.0045 | 1.33 | 0.41  | 7.73E-03 | up   |
| EFNA4    | ENSG0000024336 | protein_coding      | 0.7965   | 0.3004   | 2.65 | 1.41  | 7.76E-03 | up   |
| CLIC4P1  | ENSG0000023673 | processed_pseudo    | 1.1276   | 2.8341   | 0.40 | -1.33 | 7.82E-03 | down |
| GNG7     | ENSG0000017653 | protein_coding;no   | 0.3202   | 0.9718   | 0.33 | -1.60 | 7.85E-03 | down |
| PEX12    | ENSG0000010873 | protein_coding;no   | 1.2379   | 2.1424   | 0.58 | -0.79 | 7.87E-03 | down |
| PPP1CC   | ENSG0000018629 | protein_coding;ret  | 22.4242  | 29.7858  | 0.75 | -0.41 | 7.87E-03 | down |
| DOCK11   | ENSG0000014725 | protein_coding      | 13.2157  | 17.4120  | 0.76 | -0.40 | 7.96E-03 | down |
| PVT1     | ENSG0000024985 | lincRNA;misc_RN     | 0.8901   | 1.4286   | 0.62 | -0.68 | 7.96E-03 | down |
| DLG5     | ENSG0000015120 | protein_coding;pro  | 0.1155   | 0.0486   | 2.37 | 1.25  | 7.98E-03 | up   |
| TMEM173  | ENSG0000018458 | protein_coding;ret  | 1.7194   | 2.7110   | 0.63 | -0.66 | 8.01E-03 | down |
| UBE3A    | ENSG0000011406 | protein_coding;pro  | 2.9308   | 4.1696   | 0.70 | -0.51 | 8.01E-03 | down |
| JAZF1    | ENSG0000015381 | protein_coding;no   | 2.7824   | 4.2400   | 0.66 | -0.61 | 8.02E-03 | down |
| ANXA1    | ENSG0000013504 | protein_coding;pro  | 60.3215  | 45.3569  | 1.33 | 0.41  | 8.03E-03 | up   |
| SAR1A    | ENSG0000007933 | protein_coding;pro  | 12.9067  | 18.9620  | 0.68 | -0.55 | 8.11E-03 | down |
| YKT6     | ENSG0000010663 | retained_intron;pro | 12.4796  | 7.7610   | 1.61 | 0.69  | 8.12E-03 | up   |
| METTL16  | ENSG0000012780 | protein_coding;pro  | 0.8137   | 1.4654   | 0.56 | -0.85 | 8.13E-03 | down |
| HCAR2    | ENSG0000018278 | protein_coding      | 1.2803   | 0.6359   | 2.01 | 1.01  | 8.16E-03 | up   |
| FEZ1     | ENSG0000014955 | retained_intron;pro | 0.1858   | 0.0797   | 2.33 | 1.22  | 8.18E-03 | up   |
| CCNB2    | ENSG0000015745 | protein_coding;ret  | 13.9910  | 19.3584  | 0.72 | -0.47 | 8.18E-03 | down |
| HMOX1    | ENSG0000010029 | protein_coding;ret  | 0.8127   | 0.3722   | 2.18 | 1.13  | 8.18E-03 | up   |
| SENP8    | ENSG0000016619 | protein_coding      | 0.4977   | 0.8965   | 0.56 | -0.85 | 8.21E-03 | down |
| SAE1     | ENSG0000014223 | nonsense_mediate    | 46.4350  | 34.9649  | 1.33 | 0.41  | 8.25E-03 | up   |
| FBXO21   | ENSG0000013510 | protein_coding;pro  | 1.4471   | 0.8877   | 1.63 | 0.71  | 8.29E-03 | up   |
| FSBP     | ENSG0000026581 | protein_coding;no   | 2.0764   | 1.0704   | 1.94 | 0.96  | 8.32E-03 | up   |
| DDX19B   | ENSG0000015734 | protein_coding;no   | 9.2989   | 12.4474  | 0.75 | -0.42 | 8.33E-03 | down |
| RPL22P1  | ENSG0000021317 | processed_pseudo    | 238.1576 | 316.4621 | 0.75 | -0.41 | 8.40E-03 | down |



|           |                |                     |          |          |      |       |          |      |
|-----------|----------------|---------------------|----------|----------|------|-------|----------|------|
| MRPL45    | ENSG0000027884 | protein_coding      | 36.7533  | 48.5474  | 0.76 | -0.40 | 8.40E-03 | down |
| DPM3      | ENSG0000017908 | protein_coding      | 13.5424  | 8.1105   | 1.67 | 0.74  | 8.42E-03 | up   |
| WASH5P    | ENSG0000028245 | retained_intron;pro | 0.5753   | 0.1505   | 3.82 | 1.93  | 8.45E-03 | up   |
| IKZF2     | ENSG0000030411 | protein_coding;ret  | 0.6728   | 0.3591   | 1.87 | 0.91  | 8.48E-03 | up   |
| TMEM33    | ENSG0000010913 | protein_coding;no   | 2.7325   | 4.3170   | 0.63 | -0.66 | 8.52E-03 | down |
| DENR      | ENSG0000013972 | protein_coding;ret  | 11.4193  | 15.4331  | 0.74 | -0.43 | 8.53E-03 | down |
| PRG3      | ENSG0000015657 | protein_coding      | 5.6276   | 3.0573   | 1.84 | 0.88  | 8.60E-03 | up   |
| GALC      | ENSG0000005498 | retained_intron;pro | 6.9162   | 5.0442   | 1.37 | 0.46  | 8.60E-03 | up   |
| HS6ST1    | ENSG0000013672 | protein_coding;pro  | 5.3073   | 3.5907   | 1.48 | 0.56  | 8.61E-03 | up   |
| SUPT3H    | ENSG0000019628 | protein_coding;pro  | 2.0330   | 3.1335   | 0.65 | -0.62 | 8.63E-03 | down |
| AC243772  | ENSG0000023303 | antisense           | 0.3396   | 0.6797   | 0.50 | -1.00 | 8.63E-03 | down |
| POLR1D    | ENSG0000018618 | protein_coding;no   | 12.1868  | 16.1049  | 0.76 | -0.40 | 8.65E-03 | down |
| RABGAP1   | ENSG0000001145 | protein_coding;no   | 4.2269   | 3.0405   | 1.39 | 0.48  | 8.71E-03 | up   |
| AP003486  | ENSG0000025545 | lincRNA             | 0.6261   | 0.2912   | 2.15 | 1.10  | 8.71E-03 | up   |
| ARHGEF34  | ENSG0000020495 | unprocessed_pseu    | 0.2970   | 0.1223   | 2.43 | 1.28  | 8.79E-03 | up   |
| CLEC4A    | ENSG0000011172 | protein_coding      | 3.5941   | 1.8853   | 1.91 | 0.93  | 8.80E-03 | up   |
| PAK1      | ENSG0000014926 | protein_coding;ret  | 11.0274  | 7.5224   | 1.47 | 0.55  | 8.81E-03 | up   |
| CCT8      | ENSG0000015626 | retained_intron;pro | 87.4463  | 114.5450 | 0.76 | -0.39 | 8.82E-03 | down |
| SNHG6     | ENSG0000024591 | lincRNA;retained_   | 115.2918 | 151.3508 | 0.76 | -0.39 | 8.84E-03 | down |
| AF233439  | ENSG0000024585 | lincRNA             | 0.8342   | 0.3541   | 2.36 | 1.24  | 8.89E-03 | up   |
| ZNF280D   | ENSG0000013787 | protein_coding;pro  | 1.7457   | 2.5424   | 0.69 | -0.54 | 8.93E-03 | down |
| RPS3A     | ENSG0000014542 | protein_coding;ret  | 723.6071 | 983.9039 | 0.74 | -0.44 | 8.93E-03 | down |
| CERK      | ENSG0000010042 | protein_coding;pro  | 8.0750   | 10.8988  | 0.74 | -0.43 | 9.03E-03 | down |
| CD4       | ENSG0000001061 | protein_coding;ret  | 43.6016  | 32.9549  | 1.32 | 0.40  | 9.05E-03 | up   |
| MDH2      | ENSG0000014670 | protein_coding;ret  | 75.7814  | 57.4596  | 1.32 | 0.40  | 9.06E-03 | up   |
| RUNX2     | ENSG0000012481 | protein_coding;no   | 0.8089   | 2.0104   | 0.40 | -1.31 | 9.07E-03 | down |
| AL160408  | ENSG0000023062 | lincRNA             | 1.1127   | 0.5916   | 1.88 | 0.91  | 9.09E-03 | up   |
| AATK      | ENSG0000018140 | protein_coding;no   | 0.1163   | 0.0304   | 3.82 | 1.93  | 9.10E-03 | up   |
| RPL21P119 | ENSG0000022079 | processed_pseudo    | 20.8817  | 32.6751  | 0.64 | -0.65 | 9.16E-03 | down |
| CYB5R3    | ENSG0000010024 | protein_coding;ret  | 5.7437   | 3.5820   | 1.60 | 0.68  | 9.21E-03 | up   |
| RNF8      | ENSG0000011213 | processed_transcri  | 2.7000   | 4.1497   | 0.65 | -0.62 | 9.24E-03 | down |
| C4orf3    | ENSG0000016409 | protein_coding      | 24.6004  | 18.4894  | 1.33 | 0.41  | 9.26E-03 | up   |
| PLEKHA8   | ENSG0000010608 | protein_coding;no   | 1.6132   | 0.8230   | 1.96 | 0.97  | 9.26E-03 | up   |
| NOL11     | ENSG0000013093 | retained_intron;pro | 14.6044  | 19.2796  | 0.76 | -0.40 | 9.28E-03 | down |
| ABHD10    | ENSG0000014482 | protein_coding;no   | 18.3808  | 11.9719  | 1.54 | 0.62  | 9.32E-03 | up   |
| ERGIC3    | ENSG0000012599 | nonsense_mediate    | 30.7856  | 23.3208  | 1.32 | 0.40  | 9.37E-03 | up   |
| RAB32     | ENSG0000011850 | protein_coding      | 53.2275  | 70.2222  | 0.76 | -0.40 | 9.42E-03 | down |
| SDF4      | ENSG0000007880 | protein_coding;no   | 20.4654  | 15.1931  | 1.35 | 0.43  | 9.43E-03 | up   |
| BLOC1S5   | ENSG0000018842 | protein_coding;no   | 9.1873   | 6.1428   | 1.50 | 0.58  | 9.49E-03 | up   |
| MAGED1    | ENSG0000017922 | protein_coding;pro  | 5.4914   | 3.8482   | 1.43 | 0.51  | 9.54E-03 | up   |
| ANKRD12   | ENSG0000010174 | protein_coding;pro  | 4.4904   | 2.8942   | 1.55 | 0.63  | 9.64E-03 | up   |
| HS1BP3    | ENSG0000011896 | nonsense_mediate    | 0.7532   | 0.4672   | 1.61 | 0.69  | 9.64E-03 | up   |
| CETN2     | ENSG0000014740 | protein_coding;pro  | 17.3129  | 11.7083  | 1.48 | 0.56  | 9.64E-03 | up   |
| GALNT4    | ENSG0000025759 | protein_coding      | 1.0267   | 1.9367   | 0.53 | -0.92 | 9.66E-03 | down |
| ANXA3     | ENSG0000013877 | protein_coding;ret  | 4.3751   | 6.3582   | 0.69 | -0.54 | 9.67E-03 | down |
| TATDN3    | ENSG0000020370 | protein_coding;no   | 2.8665   | 4.5496   | 0.63 | -0.67 | 9.68E-03 | down |
| NDUFB10   | ENSG0000014099 | protein_coding;ret  | 94.9001  | 71.3096  | 1.33 | 0.41  | 9.69E-03 | up   |
| F8A3      | ENSG0000027715 | protein_coding      | 4.6796   | 2.1726   | 2.15 | 1.11  | 9.72E-03 | up   |

|          |                |                     |         |         |      |       |          |      |
|----------|----------------|---------------------|---------|---------|------|-------|----------|------|
| AC005674 | ENSG0000026149 | sense_overlapping   | 0.8396  | 0.4321  | 1.94 | 0.96  | 9.74E-03 | up   |
| FCGR2B   | ENSG0000007269 | protein_coding;ret  | 0.7767  | 0.4265  | 1.82 | 0.86  | 9.75E-03 | up   |
| SMIM25   | ENSG0000022439 | lincRNA             | 1.1294  | 2.0136  | 0.56 | -0.83 | 9.75E-03 | down |
| AL034397 | ENSG0000027453 | antisense           | 2.5776  | 1.4409  | 1.79 | 0.84  | 9.85E-03 | up   |
| ZBTB49   | ENSG0000016882 | protein_coding;no   | 0.9797  | 1.8080  | 0.54 | -0.88 | 9.85E-03 | down |
| CDIPT    | ENSG0000010350 | protein_coding;pro  | 5.6697  | 8.5507  | 0.66 | -0.59 | 9.86E-03 | down |
| CYB561D1 | ENSG0000017415 | protein_coding      | 2.1535  | 1.3330  | 1.62 | 0.69  | 9.89E-03 | up   |
| TFB2M    | ENSG0000016285 | protein_coding      | 14.8565 | 20.4554 | 0.73 | -0.46 | 9.92E-03 | down |
| ACAD11   | ENSG0000024030 | protein_coding;ret  | 3.9898  | 5.7261  | 0.70 | -0.52 | 9.93E-03 | down |
| AFG1L    | ENSG0000013553 | protein_coding;pro  | 1.1810  | 1.8358  | 0.64 | -0.64 | 9.94E-03 | down |
| STAG3    | ENSG0000006692 | protein_coding;ret  | 7.7386  | 5.8216  | 1.33 | 0.41  | 9.95E-03 | up   |
| MINDY2   | ENSG0000012892 | protein_coding;no   | 0.4968  | 1.1488  | 0.43 | -1.21 | 9.97E-03 | down |
| ZFAND1   | ENSG0000010423 | protein_coding;no   | 11.3645 | 16.9947 | 0.67 | -0.58 | 9.97E-03 | down |
| STS      | ENSG0000010184 | protein_coding      | 0.4103  | 0.2056  | 2.00 | 1.00  | 9.98E-03 | up   |
| GALNT11  | ENSG0000017823 | nonsense_mediate    | 7.1545  | 5.3316  | 1.34 | 0.42  | 9.99E-03 | up   |
| CCDC106  | ENSG0000017358 | protein_coding;ret  | 4.4682  | 2.7749  | 1.61 | 0.69  | 1.00E-02 | up   |
| GABARAPI | ENSG0000013911 | nonsense_mediate    | 9.0400  | 4.5712  | 1.98 | 0.98  | 1.00E-02 | up   |
| TCF12    | ENSG0000014026 | processed_transcri  | 11.2666 | 15.1437 | 0.74 | -0.43 | 1.00E-02 | down |
| CD68     | ENSG0000012922 | protein_coding      | 16.9102 | 12.1530 | 1.39 | 0.48  | 1.01E-02 | up   |
| TECR     | ENSG0000009979 | nonsense_mediate    | 9.8774  | 7.1650  | 1.38 | 0.46  | 1.01E-02 | up   |
| AC112220 | ENSG0000027164 | bidirectional_pron  | 0.4066  | 0.1974  | 2.06 | 1.04  | 1.01E-02 | up   |
| TRAPPC1  | ENSG0000017004 | protein_coding;no   | 34.1891 | 23.0573 | 1.48 | 0.57  | 1.01E-02 | up   |
| SLC25A12 | ENSG0000011584 | retained_intron;pro | 3.6998  | 5.4288  | 0.68 | -0.55 | 1.01E-02 | down |
| SAMD13   | ENSG0000020394 | protein_coding;ret  | 0.6826  | 1.2453  | 0.55 | -0.87 | 1.01E-02 | down |
| SMG9     | ENSG0000010577 | retained_intron;pro | 2.4973  | 3.6352  | 0.69 | -0.54 | 1.01E-02 | down |
| MTCP1    | ENSG0000021482 | protein_coding;pro  | 0.5258  | 1.1508  | 0.46 | -1.13 | 1.02E-02 | down |
| ARNTL2   | ENSG0000002915 | protein_coding;pro  | 3.4816  | 1.9328  | 1.80 | 0.85  | 1.02E-02 | up   |
| CCDC102B | ENSG0000015063 | processed_transcri  | 0.6486  | 0.3306  | 1.96 | 0.97  | 1.02E-02 | up   |
| DENND2D  | ENSG0000016277 | processed_transcri  | 2.0045  | 3.0542  | 0.66 | -0.61 | 1.02E-02 | down |
| PARD6A   | ENSG0000010298 | protein_coding;ret  | 1.1108  | 0.4906  | 2.26 | 1.18  | 1.02E-02 | up   |
| STRA6LP  | ENSG0000025503 | processed_transcri  | 0.8141  | 0.4733  | 1.72 | 0.78  | 1.03E-02 | up   |
| LRFN4    | ENSG0000017362 | protein_coding;pro  | 3.0419  | 5.2432  | 0.58 | -0.79 | 1.03E-02 | down |
| CFLAR    | ENSG0000000340 | protein_coding;ret  | 1.7077  | 1.1455  | 1.49 | 0.58  | 1.04E-02 | up   |
| BTN3A3   | ENSG0000011180 | protein_coding;ret  | 0.8273  | 1.4569  | 0.57 | -0.82 | 1.04E-02 | down |
| OR2A20P  | ENSG0000017035 | processed_transcri  | 0.3077  | 0.1157  | 2.66 | 1.41  | 1.04E-02 | up   |
| BTBD9    | ENSG0000018382 | protein_coding;no   | 0.6951  | 0.3793  | 1.83 | 0.87  | 1.04E-02 | up   |
| ATP5IF1  | ENSG0000013077 | protein_coding      | 27.7230 | 20.8683 | 1.33 | 0.41  | 1.05E-02 | up   |
| CAMK2D   | ENSG0000014534 | protein_coding;ret  | 0.3559  | 0.6235  | 0.57 | -0.81 | 1.05E-02 | down |
| MGAT4A   | ENSG0000007107 | protein_coding;pro  | 4.3900  | 6.0952  | 0.72 | -0.47 | 1.05E-02 | down |
| KLHL35   | ENSG0000014924 | retained_intron;pro | 1.2391  | 0.7016  | 1.77 | 0.82  | 1.05E-02 | up   |
| HACD3    | ENSG0000007469 | protein_coding;pro  | 7.5740  | 13.4174 | 0.56 | -0.82 | 1.05E-02 | down |
| IFNGR2   | ENSG0000015912 | protein_coding;no   | 25.2012 | 18.8400 | 1.34 | 0.42  | 1.05E-02 | up   |
| RGCC     | ENSG0000010276 | protein_coding;pro  | 16.2992 | 24.1041 | 0.68 | -0.56 | 1.06E-02 | down |
| ZNRF2    | ENSG0000018023 | protein_coding;pro  | 4.6200  | 6.8065  | 0.68 | -0.56 | 1.06E-02 | down |
| AP3S2    | ENSG0000015782 | protein_coding;no   | 1.7591  | 2.5713  | 0.68 | -0.55 | 1.06E-02 | down |
| LASP1    | ENSG0000000283 | protein_coding;ret  | 24.0490 | 18.0010 | 1.34 | 0.42  | 1.06E-02 | up   |
| DEPDC1   | ENSG0000002452 | protein_coding;ret  | 3.5911  | 5.4015  | 0.66 | -0.59 | 1.07E-02 | down |
| PQLC2    | ENSG0000004048 | nonsense_mediate    | 1.4989  | 2.5956  | 0.58 | -0.79 | 1.07E-02 | down |

|           |                |                     |          |          |      |       |          |      |
|-----------|----------------|---------------------|----------|----------|------|-------|----------|------|
| NDUFA12   | ENSG0000018475 | protein_coding;ret  | 24.5955  | 15.3367  | 1.60 | 0.68  | 1.07E-02 | up   |
| SMAD7     | ENSG0000010166 | retained_intron;pro | 1.1105   | 1.8131   | 0.61 | -0.71 | 1.07E-02 | down |
| EIF2S2    | ENSG0000012597 | protein_coding      | 82.1274  | 106.8948 | 0.77 | -0.38 | 1.07E-02 | down |
| FGF14-AS2 | ENSG0000027214 | lincRNA             | 1.1208   | 0.4703   | 2.38 | 1.25  | 1.07E-02 | up   |
| GHRLOS    | ENSG0000024028 | antisense           | 0.2510   | 0.6357   | 0.39 | -1.34 | 1.07E-02 | down |
| GLIPR1    | ENSG0000013927 | protein_coding;no   | 4.1872   | 2.8446   | 1.47 | 0.56  | 1.08E-02 | up   |
| ATG16L2   | ENSG0000016801 | retained_intron;pro | 11.3695  | 8.6069   | 1.32 | 0.40  | 1.08E-02 | up   |
| GDI2      | ENSG0000005760 | protein_coding;pro  | 41.9599  | 55.0661  | 0.76 | -0.39 | 1.08E-02 | down |
| ZNF805    | ENSG0000020452 | protein_coding      | 0.0403   | 0.2262   | 0.18 | -2.49 | 1.08E-02 | down |
| FGGY      | ENSG0000017245 | protein_coding;pro  | 0.2498   | 0.4321   | 0.58 | -0.79 | 1.08E-02 | down |
| DYNLL2    | ENSG0000026436 | protein_coding      | 13.9116  | 10.5514  | 1.32 | 0.40  | 1.08E-02 | up   |
| AC012254  | ENSG0000026722 | nonsense_mediate    | 0.0492   | 0.5121   | 0.10 | -3.38 | 1.08E-02 | down |
| ZNF471    | ENSG0000019626 | protein_coding;pro  | 0.7624   | 0.3767   | 2.02 | 1.02  | 1.09E-02 | up   |
| RAB12     | ENSG0000020641 | protein_coding;ret  | 4.8951   | 7.2870   | 0.67 | -0.57 | 1.09E-02 | down |
| ID11      | ENSG0000006706 | protein_coding;ret  | 12.6098  | 9.2133   | 1.37 | 0.45  | 1.10E-02 | up   |
| PILRA     | ENSG0000008551 | protein_coding;ret  | 9.9255   | 6.2723   | 1.58 | 0.66  | 1.11E-02 | up   |
| CRTC1     | ENSG0000010566 | protein_coding      | 0.8470   | 0.4890   | 1.73 | 0.79  | 1.11E-02 | up   |
| LRG1      | ENSG0000017123 | protein_coding;pro  | 21.5335  | 15.4254  | 1.40 | 0.48  | 1.11E-02 | up   |
| AP2B1     | ENSG0000000612 | protein_coding;no   | 28.2131  | 20.2232  | 1.40 | 0.48  | 1.11E-02 | up   |
| HELZ2     | ENSG0000013058 | protein_coding;pro  | 0.1410   | 0.0626   | 2.25 | 1.17  | 1.11E-02 | up   |
| NAB2      | ENSG0000016688 | protein_coding;pro  | 5.3171   | 3.4259   | 1.55 | 0.63  | 1.11E-02 | up   |
| UTP4      | ENSG0000014107 | protein_coding;ret  | 13.6625  | 17.6728  | 0.77 | -0.37 | 1.11E-02 | down |
| TSTD1     | ENSG0000021584 | retained_intron;pro | 8.2511   | 4.9641   | 1.66 | 0.73  | 1.13E-02 | up   |
| IL10RB-DT | ENSG0000022379 | antisense           | 2.6326   | 1.4420   | 1.83 | 0.87  | 1.13E-02 | up   |
| NDE1      | ENSG0000007286 | nonsense_mediate    | 2.3909   | 3.6193   | 0.66 | -0.60 | 1.13E-02 | down |
| CENPK     | ENSG0000012321 | protein_coding;no   | 2.9545   | 4.4163   | 0.67 | -0.58 | 1.13E-02 | down |
| CROT      | ENSG0000000546 | protein_coding;ret  | 0.5382   | 0.2606   | 2.07 | 1.05  | 1.13E-02 | up   |
| BTF3      | ENSG0000014574 | protein_coding;ret  | 135.1379 | 175.3235 | 0.77 | -0.38 | 1.13E-02 | down |
| TNFAIP8L3 | ENSG0000018357 | protein_coding      | 0.2332   | 0.5027   | 0.46 | -1.11 | 1.13E-02 | down |
| G6PD      | ENSG0000016021 | protein_coding;ret  | 12.7642  | 9.0069   | 1.42 | 0.50  | 1.13E-02 | up   |
| NSMAF     | ENSG0000003568 | processed_transcri  | 12.7530  | 16.5567  | 0.77 | -0.38 | 1.13E-02 | down |
| APOO      | ENSG0000018483 | protein_coding;ret  | 2.7336   | 4.3422   | 0.63 | -0.67 | 1.14E-02 | down |
| NUDT13    | ENSG0000016632 | protein_coding;pro  | 1.2572   | 2.1093   | 0.60 | -0.75 | 1.14E-02 | down |
| EPOP      | ENSG0000027360 | protein_coding      | 0.7601   | 0.3835   | 1.98 | 0.99  | 1.15E-02 | up   |
| CCDC124   | ENSG0000000708 | protein_coding;ret  | 30.7128  | 22.1860  | 1.38 | 0.47  | 1.15E-02 | up   |
| S100BPB   | ENSG0000011649 | protein_coding;pro  | 3.5056   | 1.8779   | 1.87 | 0.90  | 1.15E-02 | up   |
| ZNF10     | ENSG0000025622 | protein_coding;ret  | 1.7866   | 0.9103   | 1.96 | 0.97  | 1.15E-02 | up   |
| ARHGAP10  | ENSG0000007120 | protein_coding;ret  | 0.6350   | 0.3681   | 1.73 | 0.79  | 1.15E-02 | up   |
| ZNF267    | ENSG0000018594 | protein_coding;ret  | 3.6521   | 6.0671   | 0.60 | -0.73 | 1.15E-02 | down |
| NEXN      | ENSG0000016261 | protein_coding;pro  | 0.1197   | 0.2648   | 0.45 | -1.15 | 1.15E-02 | down |
| EFR3A     | ENSG0000013229 | retained_intron;pro | 5.6030   | 8.1356   | 0.69 | -0.54 | 1.16E-02 | down |
| RHBDD2    | ENSG0000000548 | nonsense_mediate    | 2.2328   | 1.2380   | 1.80 | 0.85  | 1.16E-02 | up   |
| AL359532  | ENSG0000027291 | sense_intronic      | 0.7342   | 1.5058   | 0.49 | -1.04 | 1.16E-02 | down |
| HIKESHI   | ENSG0000014919 | nonsense_mediate    | 9.1789   | 6.1380   | 1.50 | 0.58  | 1.17E-02 | up   |
| CDKN1B    | ENSG0000011127 | protein_coding;pro  | 11.8716  | 16.0522  | 0.74 | -0.44 | 1.17E-02 | down |
| AC022400  | ENSG0000027908 | TEC                 | 11.1103  | 16.4247  | 0.68 | -0.56 | 1.18E-02 | down |
| HSPE1P2   | ENSG0000025864 | processed_pseudo    | 13.9292  | 7.8356   | 1.78 | 0.83  | 1.18E-02 | up   |
| SMIM14    | ENSG0000016368 | protein_coding;no   | 1.2404   | 0.7360   | 1.69 | 0.75  | 1.18E-02 | up   |

|           |                |                     |         |          |      |       |          |      |
|-----------|----------------|---------------------|---------|----------|------|-------|----------|------|
| RCN1      | ENSG0000004944 | protein_coding;ret  | 7.2721  | 5.1877   | 1.40 | 0.49  | 1.18E-02 | up   |
| MTO1      | ENSG0000013529 | protein_coding;no   | 3.2605  | 4.4409   | 0.73 | -0.45 | 1.18E-02 | down |
| CD53      | ENSG0000014311 | processed_transcri  | 42.5626 | 32.4319  | 1.31 | 0.39  | 1.18E-02 | up   |
| ANPEP     | ENSG0000016682 | protein_coding;pro  | 22.9715 | 16.9875  | 1.35 | 0.44  | 1.18E-02 | up   |
| EEF1B2P3  | ENSG0000023247 | processed_pseudo;   | 77.9469 | 102.4637 | 0.76 | -0.39 | 1.19E-02 | down |
| IFT57     | ENSG0000011444 | protein_coding;pro  | 37.3623 | 48.2599  | 0.77 | -0.37 | 1.19E-02 | down |
| OSBPL11   | ENSG0000014490 | protein_coding      | 2.9854  | 1.9549   | 1.53 | 0.61  | 1.19E-02 | up   |
| ITGB2-AS1 | ENSG0000022703 | antisense           | 3.6004  | 1.1354   | 3.17 | 1.66  | 1.19E-02 | up   |
| CERCAM    | ENSG0000016712 | retained_intron;pro | 0.5613  | 0.2986   | 1.88 | 0.91  | 1.19E-02 | up   |
| MEPCE     | ENSG0000014683 | protein_coding;ret  | 12.6937 | 9.1180   | 1.39 | 0.48  | 1.19E-02 | up   |
| RNF121    | ENSG0000013752 | protein_coding;ret  | 5.3639  | 3.3304   | 1.61 | 0.69  | 1.19E-02 | up   |
| NREP      | ENSG0000013498 | protein_coding;pro  | 7.4478  | 5.3584   | 1.39 | 0.48  | 1.21E-02 | up   |
| MMS22L    | ENSG0000014626 | retained_intron;pro | 1.9238  | 2.5417   | 0.76 | -0.40 | 1.21E-02 | down |
| CEACAM8   | ENSG0000012446 | protein_coding      | 11.7310 | 16.2730  | 0.72 | -0.47 | 1.21E-02 | down |
| PBRM1     | ENSG0000016393 | protein_coding;ret  | 4.9375  | 6.5912   | 0.75 | -0.42 | 1.22E-02 | down |
| RAB3A     | ENSG0000010564 | retained_intron;pro | 0.4871  | 0.1906   | 2.56 | 1.35  | 1.22E-02 | up   |
| PCDHGA8   | ENSG0000025376 | protein_coding      | 0.0435  | 0.1024   | 0.42 | -1.24 | 1.23E-02 | down |
| IL2RG     | ENSG0000014716 | protein_coding;ret  | 30.5627 | 23.1348  | 1.32 | 0.40  | 1.23E-02 | up   |
| RNF41     | ENSG0000018185 | retained_intron;pro | 7.6123  | 10.3255  | 0.74 | -0.44 | 1.24E-02 | down |
| SRA1      | ENSG0000021352 | retained_intron;pro | 7.9105  | 5.4043   | 1.46 | 0.55  | 1.24E-02 | up   |
| UBE2E2    | ENSG0000018224 | protein_coding;no   | 4.7355  | 6.9178   | 0.68 | -0.55 | 1.24E-02 | down |
| ACOT7     | ENSG0000009702 | protein_coding;no   | 8.1755  | 5.6366   | 1.45 | 0.54  | 1.24E-02 | up   |
| EBP       | ENSG0000014715 | protein_coding;pro  | 36.1157 | 27.2370  | 1.33 | 0.41  | 1.25E-02 | up   |
| CIITA     | ENSG0000017958 | protein_coding;ret  | 0.0450  | 0.0974   | 0.46 | -1.11 | 1.25E-02 | down |
| TGFA      | ENSG0000016323 | protein_coding;pro  | 1.4844  | 0.8607   | 1.72 | 0.79  | 1.25E-02 | up   |
| LRRC1     | ENSG0000013726 | protein_coding;no   | 0.1997  | 0.0825   | 2.42 | 1.27  | 1.25E-02 | up   |
| ARPC4     | ENSG0000024155 | protein_coding;ret  | 34.1095 | 48.7120  | 0.70 | -0.51 | 1.25E-02 | down |
| ZNF773    | ENSG0000015243 | protein_coding;no   | 0.2759  | 0.6135   | 0.45 | -1.15 | 1.26E-02 | down |
| FAM214B   | ENSG0000000523 | protein_coding;pro  | 2.5131  | 1.5386   | 1.63 | 0.71  | 1.26E-02 | up   |
| MTIF2     | ENSG0000008576 | protein_coding;pro  | 24.6718 | 31.9152  | 0.77 | -0.37 | 1.26E-02 | down |
| AC097534  | ENSG0000024877 | antisense           | 1.7430  | 0.6839   | 2.55 | 1.35  | 1.26E-02 | up   |
| ICOSLG    | ENSG0000016022 | protein_coding      | 0.2859  | 0.5062   | 0.56 | -0.82 | 1.26E-02 | down |
| C11orf1   | ENSG0000013772 | protein_coding      | 3.1365  | 4.7055   | 0.67 | -0.59 | 1.26E-02 | down |
| CARNMT1   | ENSG0000015601 | protein_coding      | 5.7065  | 7.7987   | 0.73 | -0.45 | 1.26E-02 | down |
| SIGLEC12  | ENSG0000025452 | protein_coding;no   | 2.3772  | 3.8816   | 0.61 | -0.71 | 1.26E-02 | down |
| EMC1      | ENSG0000012746 | protein_coding;ret  | 8.6169  | 6.5318   | 1.32 | 0.40  | 1.26E-02 | up   |
| BUB1B     | ENSG0000015697 | protein_coding;ret  | 12.3424 | 16.2910  | 0.76 | -0.40 | 1.26E-02 | down |
| PRKCQ     | ENSG0000006567 | protein_coding      | 0.3469  | 0.1064   | 3.26 | 1.70  | 1.26E-02 | up   |
| AC013489  | ENSG0000017386 | protein_coding;pro  | 0.3060  | 0.9239   | 0.33 | -1.59 | 1.26E-02 | down |
| BRCA2     | ENSG0000013961 | nonsense_mediate    | 3.7609  | 2.6850   | 1.40 | 0.49  | 1.27E-02 | up   |
| AC133644  | ENSG0000028487 | processed_transcri  | 2.8398  | 4.2899   | 0.66 | -0.60 | 1.27E-02 | down |
| AC115223  | ENSG0000024319 | processed_pseudo;   | 40.6147 | 54.8913  | 0.74 | -0.43 | 1.27E-02 | down |
| ID2       | ENSG0000011573 | protein_coding;ret  | 17.9217 | 12.9793  | 1.38 | 0.47  | 1.28E-02 | up   |
| GPI       | ENSG0000010522 | retained_intron;pro | 24.6159 | 32.4298  | 0.76 | -0.40 | 1.28E-02 | down |
| MARCO     | ENSG0000001916 | protein_coding;ret  | 0.0715  | 0.4761   | 0.15 | -2.74 | 1.29E-02 | down |
| SGK1      | ENSG0000011851 | protein_coding;ret  | 3.4957  | 2.4186   | 1.45 | 0.53  | 1.29E-02 | up   |
| GOLGA8A   | ENSG0000017526 | processed_transcri  | 18.3722 | 13.8103  | 1.33 | 0.41  | 1.29E-02 | up   |
| SPART     | ENSG0000013310 | processed_transcri  | 19.4086 | 25.8251  | 0.75 | -0.41 | 1.30E-02 | down |

|           |                                    |          |          |      |       |          |      |
|-----------|------------------------------------|----------|----------|------|-------|----------|------|
| TXNIP     | ENSG0000026597.protein_coding;ret  | 93.9828  | 122.9292 | 0.76 | -0.39 | 1.30E-02 | down |
| EXOG      | ENSG0000015703.protein_coding;no   | 1.6392   | 1.0046   | 1.63 | 0.71  | 1.30E-02 | up   |
| SIK1      | ENSG0000014217.protein_coding;ret  | 0.1993   | 0.3949   | 0.50 | -0.99 | 1.31E-02 | down |
| WARS2     | ENSG0000011687.protein_coding;pro  | 3.1082   | 4.6342   | 0.67 | -0.58 | 1.31E-02 | down |
| TMEM230   | ENSG0000008906.protein_coding;pro  | 24.1223  | 12.4507  | 1.94 | 0.95  | 1.31E-02 | up   |
| RAB2B     | ENSG0000012947.protein_coding;pro  | 3.9175   | 5.7747   | 0.68 | -0.56 | 1.31E-02 | down |
| GPR155    | ENSG0000016332.protein_coding;pro  | 0.1433   | 0.0633   | 2.27 | 1.18  | 1.32E-02 | up   |
| ACTG1     | ENSG0000018400.retained_intron;pro | 277.9734 | 212.7925 | 1.31 | 0.39  | 1.32E-02 | up   |
| IL5RA     | ENSG0000009118.protein_coding;pro  | 1.0977   | 0.6584   | 1.67 | 0.74  | 1.32E-02 | up   |
| CFD       | ENSG0000019776.protein_coding      | 54.6707  | 40.9941  | 1.33 | 0.42  | 1.33E-02 | up   |
| RPL22L1   | ENSG0000016358.retained_intron;pro | 6.8384   | 11.0555  | 0.62 | -0.69 | 1.33E-02 | down |
| CD163     | ENSG0000017757.protein_coding;ret  | 0.3026   | 0.5558   | 0.54 | -0.88 | 1.33E-02 | down |
| SLC27A5   | ENSG0000008380.nonsense_mediate    | 1.2955   | 0.8184   | 1.58 | 0.66  | 1.33E-02 | up   |
| RBM3      | ENSG0000010231.protein_coding;pro  | 35.4829  | 46.2316  | 0.77 | -0.38 | 1.33E-02 | down |
| ZNF23     | ENSG0000016737.protein_coding;ret  | 1.0552   | 2.1270   | 0.50 | -1.01 | 1.33E-02 | down |
| ATP6V1G2  | ENSG0000025487.nonsense_mediate    | 1.9000   | 6.2485   | 0.30 | -1.72 | 1.33E-02 | down |
| ZNF311    | ENSG0000019793.retained_intron;pro | 1.2841   | 2.2817   | 0.56 | -0.83 | 1.33E-02 | down |
| FGFR1     | ENSG0000007778.nonsense_mediate    | 0.1209   | 0.2192   | 0.55 | -0.86 | 1.33E-02 | down |
| NLN       | ENSG0000012321.retained_intron;pro | 3.1562   | 2.2562   | 1.40 | 0.48  | 1.34E-02 | up   |
| HSP90AB1  | ENSG0000009638.protein_coding      | 463.9373 | 593.8594 | 0.78 | -0.36 | 1.34E-02 | down |
| AC046185  | ENSG0000027936.TEC                 | 5.5658   | 3.5168   | 1.58 | 0.66  | 1.34E-02 | up   |
| RAP1A     | ENSG0000011647.processed_transcri  | 12.0672  | 16.6184  | 0.73 | -0.46 | 1.34E-02 | down |
| ST3GAL3   | ENSG0000012609.nonsense_mediate    | 0.3549   | 0.5503   | 0.64 | -0.63 | 1.35E-02 | down |
| FOXP2     | ENSG0000012857.nonsense_mediate    | 0.1052   | 0.1927   | 0.55 | -0.87 | 1.35E-02 | down |
| BTF3L4    | ENSG0000013471.protein_coding;ret  | 7.8443   | 10.4507  | 0.75 | -0.41 | 1.35E-02 | down |
| POP5      | ENSG0000016727.retained_intron;pro | 14.8451  | 10.4047  | 1.43 | 0.51  | 1.36E-02 | up   |
| NCOA4     | ENSG0000026641.protein_coding      | 119.2467 | 154.0507 | 0.77 | -0.37 | 1.36E-02 | down |
| NIFK      | ENSG0000015543.protein_coding;ret  | 29.1499  | 38.1354  | 0.76 | -0.39 | 1.36E-02 | down |
| SLC25A36  | ENSG0000011412.nonsense_mediate    | 11.0046  | 5.7536   | 1.91 | 0.94  | 1.37E-02 | up   |
| SERPINB8  | ENSG0000016640.protein_coding      | 7.8005   | 10.4386  | 0.75 | -0.42 | 1.37E-02 | down |
| C17orf51  | ENSG0000021271.protein_coding;lin  | 0.1493   | 0.0702   | 2.13 | 1.09  | 1.37E-02 | up   |
| PRUNE1    | ENSG0000014336.protein_coding;pro  | 2.4842   | 4.2409   | 0.59 | -0.77 | 1.38E-02 | down |
| SUPT16HP1 | ENSG0000025623.processed_pseudo    | 0.4519   | 0.2102   | 2.15 | 1.10  | 1.38E-02 | up   |
| ATP6AP1   | ENSG0000007155.protein_coding;pro  | 16.1873  | 12.1416  | 1.33 | 0.41  | 1.38E-02 | up   |
| FAM102A   | ENSG0000016710.protein_coding;pro  | 0.3856   | 0.1973   | 1.95 | 0.97  | 1.38E-02 | up   |
| ARMCX5-G  | ENSG0000027114.processed_transcri  | 0.5888   | 1.4815   | 0.40 | -1.33 | 1.38E-02 | down |
| DDX59     | ENSG0000011819.protein_coding      | 2.5613   | 3.8622   | 0.66 | -0.59 | 1.38E-02 | down |
| PSPH      | ENSG0000014673.protein_coding;no   | 1.1407   | 1.9089   | 0.60 | -0.74 | 1.39E-02 | down |
| AC010719  | ENSG0000027093.lincRNA             | 1.6848   | 0.7708   | 2.19 | 1.13  | 1.39E-02 | up   |
| IFRD1     | ENSG0000000665.protein_coding;pro  | 8.0503   | 10.9314  | 0.74 | -0.44 | 1.40E-02 | down |
| MTERF2    | ENSG0000012083.protein_coding;pro  | 0.2802   | 0.1209   | 2.32 | 1.21  | 1.40E-02 | up   |
| DUSP12    | ENSG0000008172.protein_coding;no   | 12.4827  | 17.5439  | 0.71 | -0.49 | 1.40E-02 | down |
| AUH       | ENSG0000014809.protein_coding;pro  | 2.1402   | 3.4452   | 0.62 | -0.69 | 1.40E-02 | down |
| RPS26P8   | ENSG0000020465.processed_pseudo    | 5.7349   | 13.2489  | 0.43 | -1.21 | 1.41E-02 | down |
| AL354718  | ENSG0000027516.processed_pseudo    | 1.1459   | 2.3856   | 0.48 | -1.06 | 1.41E-02 | down |
| AMN1      | ENSG0000015174.protein_coding;pro  | 1.6058   | 0.9300   | 1.73 | 0.79  | 1.41E-02 | up   |
| AC073349  | ENSG0000023433.processed_pseudo    | 0.8580   | 0.3739   | 2.29 | 1.20  | 1.41E-02 | up   |
| ARRDC1-A  | ENSG0000020399.antisense           | 3.4474   | 2.0549   | 1.68 | 0.75  | 1.41E-02 | up   |

|           |                |                      |          |          |      |       |          |      |
|-----------|----------------|----------------------|----------|----------|------|-------|----------|------|
| GCNT1     | ENSG0000018721 | protein_coding;proc  | 0.8254   | 2.0614   | 0.40 | -1.32 | 1.42E-02 | down |
| TMEM109   | ENSG0000011010 | protein_coding;proc  | 49.6258  | 38.1294  | 1.30 | 0.38  | 1.42E-02 | up   |
| UBE2A     | ENSG0000007772 | protein_coding;ret   | 7.6163   | 11.2610  | 0.68 | -0.56 | 1.42E-02 | down |
| PPP2R3C   | ENSG0000009202 | protein_coding;no    | 7.6102   | 10.3280  | 0.74 | -0.44 | 1.43E-02 | down |
| CTDSPL2   | ENSG0000013777 | retained_intron;proc | 4.7676   | 6.4058   | 0.74 | -0.43 | 1.43E-02 | down |
| ZNF467    | ENSG0000018144 | protein_coding       | 2.1712   | 1.2744   | 1.70 | 0.77  | 1.43E-02 | up   |
| DDTL      | ENSG0000009997 | protein_coding       | 15.1998  | 10.5161  | 1.45 | 0.53  | 1.43E-02 | up   |
| AL590867  | ENSG0000021842 | processed_pseudo;    | 49.3608  | 68.9444  | 0.72 | -0.48 | 1.43E-02 | down |
| TNRC6A    | ENSG0000009090 | protein_coding;ret   | 3.3170   | 2.4109   | 1.38 | 0.46  | 1.43E-02 | up   |
| RMND1     | ENSG0000015590 | protein_coding;no    | 8.8379   | 11.9948  | 0.74 | -0.44 | 1.44E-02 | down |
| LARS      | ENSG0000013370 | protein_coding;ret   | 30.1012  | 38.7788  | 0.78 | -0.37 | 1.44E-02 | down |
| B3GLCT    | ENSG0000018767 | protein_coding;proc  | 0.7099   | 0.3659   | 1.94 | 0.96  | 1.44E-02 | up   |
| RPL6      | ENSG0000008900 | protein_coding;ret   | 306.9539 | 392.8701 | 0.78 | -0.36 | 1.44E-02 | down |
| ECHS1     | ENSG0000012788 | protein_coding       | 118.8903 | 91.9086  | 1.29 | 0.37  | 1.45E-02 | up   |
| WRNIP1    | ENSG0000012453 | protein_coding       | 12.0785  | 9.0090   | 1.34 | 0.42  | 1.45E-02 | up   |
| GIHCG     | ENSG0000025769 | retained_intron;lin  | 35.0507  | 46.2401  | 0.76 | -0.40 | 1.45E-02 | down |
| ARMC6     | ENSG0000010567 | protein_coding;no    | 5.2890   | 7.5387   | 0.70 | -0.51 | 1.45E-02 | down |
| BAZ2A     | ENSG0000007610 | protein_coding;ret   | 4.3329   | 3.0456   | 1.42 | 0.51  | 1.45E-02 | up   |
| AC079250  | ENSG0000023097 | processed_pseudo;    | 14.0600  | 21.8244  | 0.64 | -0.63 | 1.46E-02 | down |
| ADGRE2    | ENSG0000012750 | protein_coding;no    | 2.0152   | 1.3594   | 1.48 | 0.57  | 1.46E-02 | up   |
| AC068888  | ENSG0000025733 | antisense            | 0.1825   | 0.4810   | 0.38 | -1.40 | 1.47E-02 | down |
| EPHX1     | ENSG0000014381 | protein_coding;proc  | 2.4230   | 1.4457   | 1.68 | 0.75  | 1.47E-02 | up   |
| EIF4E3    | ENSG0000016341 | protein_coding;proc  | 1.3496   | 0.8974   | 1.50 | 0.59  | 1.47E-02 | up   |
| MIR600HG  | ENSG0000023690 | sense_intronic       | 1.6655   | 1.0279   | 1.62 | 0.70  | 1.47E-02 | up   |
| ADI1      | ENSG0000018255 | protein_coding       | 19.9514  | 14.1638  | 1.41 | 0.49  | 1.47E-02 | up   |
| PDLIM5    | ENSG0000016311 | protein_coding;no    | 1.8344   | 1.2491   | 1.47 | 0.55  | 1.48E-02 | up   |
| CTSA      | ENSG0000006460 | protein_coding;ret   | 22.1868  | 16.7018  | 1.33 | 0.41  | 1.48E-02 | up   |
| TOMM40L   | ENSG0000015888 | protein_coding;proc  | 2.0767   | 4.6333   | 0.45 | -1.16 | 1.48E-02 | down |
| TTC9C     | ENSG0000016222 | nonsense_mediate     | 2.8399   | 4.5672   | 0.62 | -0.69 | 1.48E-02 | down |
| RPL18     | ENSG0000006317 | nonsense_mediate     | 164.1864 | 213.7742 | 0.77 | -0.38 | 1.48E-02 | down |
| TRIB3     | ENSG0000010125 | protein_coding       | 20.0847  | 27.4254  | 0.73 | -0.45 | 1.49E-02 | down |
| IPMK      | ENSG0000015115 | protein_coding       | 1.8523   | 2.7761   | 0.67 | -0.58 | 1.49E-02 | down |
| DENND5A   | ENSG0000018401 | retained_intron;proc | 5.0446   | 6.6307   | 0.76 | -0.39 | 1.49E-02 | down |
| LINC00909 | ENSG0000026424 | lincRNA              | 4.3628   | 6.3479   | 0.69 | -0.54 | 1.50E-02 | down |
| SNORA44   | ENSG0000027354 | snoRNA               | 0.7735   | 5.3824   | 0.14 | -2.80 | 1.50E-02 | down |
| CRYBG3    | ENSG0000008020 | protein_coding;proc  | 0.9987   | 0.6279   | 1.59 | 0.67  | 1.50E-02 | up   |
| ADGRA3    | ENSG0000015299 | protein_coding;ret   | 4.6653   | 3.4963   | 1.33 | 0.42  | 1.50E-02 | up   |
| ASB7      | ENSG0000018347 | protein_coding;ret   | 1.2282   | 1.9139   | 0.64 | -0.64 | 1.51E-02 | down |
| MTG1      | ENSG0000014882 | protein_coding;ret   | 5.1189   | 3.5712   | 1.43 | 0.52  | 1.51E-02 | up   |
| FASN      | ENSG0000016971 | retained_intron;proc | 6.4056   | 4.5099   | 1.42 | 0.51  | 1.52E-02 | up   |
| NPDC1     | ENSG0000010728 | protein_coding;ret   | 1.3965   | 0.7620   | 1.83 | 0.87  | 1.52E-02 | up   |
| EIF4B     | ENSG0000006304 | protein_coding;no    | 71.5564  | 107.5783 | 0.67 | -0.59 | 1.52E-02 | down |
| KIAA1211  | ENSG0000010926 | protein_coding;proc  | 0.2615   | 0.1153   | 2.27 | 1.18  | 1.52E-02 | up   |
| KLHL2     | ENSG0000010946 | protein_coding;proc  | 9.5114   | 6.9970   | 1.36 | 0.44  | 1.53E-02 | up   |
| MLST8     | ENSG0000016796 | protein_coding;ret   | 6.4501   | 8.8946   | 0.73 | -0.46 | 1.53E-02 | down |
| ICAM3     | ENSG0000007666 | retained_intron;proc | 31.4391  | 22.8513  | 1.38 | 0.46  | 1.53E-02 | up   |
| CPM       | ENSG0000013567 | protein_coding;ret   | 0.8912   | 1.3946   | 0.64 | -0.65 | 1.54E-02 | down |
| ZNF664    | ENSG0000017919 | protein_coding;proc  | 17.9551  | 8.0158   | 2.24 | 1.16  | 1.55E-02 | up   |

|          |                |                     |          |          |      |       |          |      |
|----------|----------------|---------------------|----------|----------|------|-------|----------|------|
| AKR1A1   | ENSG0000011744 | protein_coding;pro  | 22.6460  | 17.3029  | 1.31 | 0.39  | 1.55E-02 | up   |
| CCHCR1   | ENSG0000020453 | protein_coding;no   | 4.4705   | 3.0751   | 1.45 | 0.54  | 1.55E-02 | up   |
| ISL2     | ENSG0000015955 | protein_coding;no   | 2.3047   | 3.7489   | 0.61 | -0.70 | 1.55E-02 | down |
| UTP18    | ENSG0000001126 | nonsense_mediate    | 24.7807  | 31.9194  | 0.78 | -0.37 | 1.56E-02 | down |
| TUBB2A   | ENSG0000013726 | protein_coding;pro  | 0.6453   | 0.2928   | 2.20 | 1.14  | 1.56E-02 | up   |
| FNDC10   | ENSG0000022859 | protein_coding      | 3.4176   | 2.0678   | 1.65 | 0.72  | 1.56E-02 | up   |
| ATP5MC1  | ENSG0000015919 | processed_transcri  | 29.4901  | 22.3562  | 1.32 | 0.40  | 1.56E-02 | up   |
| NOLC1    | ENSG0000016619 | protein_coding;no   | 67.3236  | 51.7189  | 1.30 | 0.38  | 1.57E-02 | up   |
| ZNF518B  | ENSG0000017816 | protein_coding;ret  | 0.0734   | 0.1585   | 0.46 | -1.11 | 1.57E-02 | down |
| AL365181 | ENSG0000027206 | lincRNA             | 0.1490   | 0.3271   | 0.46 | -1.13 | 1.58E-02 | down |
| TERF2    | ENSG0000013260 | protein_coding;pro  | 2.9548   | 4.6795   | 0.63 | -0.66 | 1.58E-02 | down |
| MT-ND4L  | ENSG0000021290 | protein_coding      | #####    | #####    | 1.29 | 0.37  | 1.59E-02 | up   |
| NAXE     | ENSG0000016338 | protein_coding;pro  | 25.7760  | 19.1926  | 1.34 | 0.43  | 1.59E-02 | up   |
| NUS1P1   | ENSG0000023563 | processed_pseudo;   | 0.5980   | 1.6754   | 0.36 | -1.49 | 1.59E-02 | down |
| AL353622 | ENSG0000027060 | antisense           | 0.3529   | 0.7960   | 0.44 | -1.17 | 1.60E-02 | down |
| GBE1     | ENSG0000011448 | protein_coding;ret  | 15.1722  | 11.5506  | 1.31 | 0.39  | 1.60E-02 | up   |
| FAM217B  | ENSG0000019622 | protein_coding;pro  | 0.5949   | 1.6887   | 0.35 | -1.51 | 1.60E-02 | down |
| ERC1     | ENSG0000008280 | protein_coding;no   | 0.9114   | 0.5445   | 1.67 | 0.74  | 1.60E-02 | up   |
| USP49    | ENSG0000016466 | protein_coding;no   | 1.4100   | 2.0909   | 0.67 | -0.57 | 1.61E-02 | down |
| DUSP3    | ENSG0000010886 | protein_coding;pro  | 9.1354   | 11.8378  | 0.77 | -0.37 | 1.61E-02 | down |
| SATB1    | ENSG0000018256 | protein_coding;ret  | 1.8214   | 1.2631   | 1.44 | 0.53  | 1.61E-02 | up   |
| AHDC1    | ENSG0000012670 | protein_coding;pro  | 0.3193   | 0.1608   | 1.99 | 0.99  | 1.61E-02 | up   |
| TBCD     | ENSG0000014155 | protein_coding;pro  | 1.9731   | 1.3327   | 1.48 | 0.57  | 1.61E-02 | up   |
| GPR137B  | ENSG0000007758 | protein_coding;pro  | 3.3008   | 2.0340   | 1.62 | 0.70  | 1.61E-02 | up   |
| POLR3H   | ENSG0000010041 | protein_coding;no   | 4.6292   | 6.5156   | 0.71 | -0.49 | 1.62E-02 | down |
| TEP1     | ENSG0000012956 | protein_coding;no   | 1.3652   | 0.8857   | 1.54 | 0.62  | 1.62E-02 | up   |
| RAC2     | ENSG0000012834 | protein_coding;ret  | 136.8109 | 105.5948 | 1.30 | 0.37  | 1.62E-02 | up   |
| EPB41L5  | ENSG0000011510 | protein_coding;pro  | 0.1352   | 0.0603   | 2.24 | 1.16  | 1.62E-02 | up   |
| RPL13AP5 | ENSG0000023655 | processed_pseudo;   | 228.3428 | 299.8638 | 0.76 | -0.39 | 1.62E-02 | down |
| PIK3CB   | ENSG0000005138 | protein_coding;ret  | 7.9975   | 11.5865  | 0.69 | -0.53 | 1.63E-02 | down |
| FAM86C2P | ENSG0000016017 | processed_transcri  | 0.4582   | 0.8473   | 0.54 | -0.89 | 1.63E-02 | down |
| CDK2AP2  | ENSG0000016779 | nonsense_mediate    | 5.4593   | 8.1609   | 0.67 | -0.58 | 1.63E-02 | down |
| CENPH    | ENSG0000015304 | protein_coding;ret  | 6.5510   | 9.6470   | 0.68 | -0.56 | 1.63E-02 | down |
| NANS     | ENSG0000009538 | processed_transcri  | 15.8031  | 11.9482  | 1.32 | 0.40  | 1.63E-02 | up   |
| PLEKHF2  | ENSG0000017589 | protein_coding      | 9.5876   | 13.0057  | 0.74 | -0.44 | 1.63E-02 | down |
| NDUFA3   | ENSG0000017090 | nonsense_mediate    | 16.8881  | 12.5719  | 1.34 | 0.43  | 1.64E-02 | up   |
| FTH1     | ENSG0000016799 | protein_coding;ret  | 79.2730  | 58.2270  | 1.36 | 0.45  | 1.64E-02 | up   |
| EGLN1    | ENSG0000013576 | protein_coding;pro  | 5.8813   | 7.6728   | 0.77 | -0.38 | 1.64E-02 | down |
| PLAC8    | ENSG0000014528 | protein_coding;pro  | 60.0494  | 76.8992  | 0.78 | -0.36 | 1.64E-02 | down |
| GMIP     | ENSG0000008963 | protein_coding;no   | 9.5568   | 6.8948   | 1.39 | 0.47  | 1.64E-02 | up   |
| HNRNPH1  | ENSG0000016904 | nonsense_mediate    | 17.3673  | 22.3909  | 0.78 | -0.37 | 1.65E-02 | down |
| BTRC     | ENSG0000016616 | protein_coding;pro  | 3.2761   | 2.2460   | 1.46 | 0.54  | 1.65E-02 | up   |
| CCDC115  | ENSG0000013671 | protein_coding;no   | 10.1187  | 7.4767   | 1.35 | 0.44  | 1.65E-02 | up   |
| NDUFB2   | ENSG0000009026 | nonsense_mediate    | 17.1338  | 12.6385  | 1.36 | 0.44  | 1.65E-02 | up   |
| NAT14    | ENSG0000009097 | protein_coding;pro  | 2.8699   | 1.5309   | 1.87 | 0.91  | 1.65E-02 | up   |
| PPA1     | ENSG0000018081 | retained_intron;pro | 55.6479  | 71.2556  | 0.78 | -0.36 | 1.66E-02 | down |
| SLC5A3   | ENSG0000019874 | protein_coding      | 8.7187   | 6.5330   | 1.33 | 0.42  | 1.66E-02 | up   |
| ACSM3    | ENSG0000000518 | processed_transcri  | 3.7498   | 5.0870   | 0.74 | -0.44 | 1.67E-02 | down |

|           |                |                      |          |          |      |       |          |      |
|-----------|----------------|----------------------|----------|----------|------|-------|----------|------|
| ZNF573    | ENSG0000018914 | protein_coding;proc  | 0.5373   | 0.2699   | 1.99 | 0.99  | 1.67E-02 | up   |
| ITGA1     | ENSG0000021394 | protein_coding;proc  | 0.0735   | 0.0332   | 2.21 | 1.15  | 1.67E-02 | up   |
| MUC19     | ENSG0000020559 | processed_transcri   | 0.0484   | 0.0971   | 0.50 | -1.00 | 1.68E-02 | down |
| ASF1B     | ENSG0000010501 | protein_coding;no    | 20.6746  | 15.4469  | 1.34 | 0.42  | 1.68E-02 | up   |
| EPHA1-AS1 | ENSG0000022915 | antisense            | 0.1953   | 0.3881   | 0.50 | -0.99 | 1.68E-02 | down |
| SIVA1     | ENSG0000018499 | nonsense_mediate     | 20.4103  | 15.5527  | 1.31 | 0.39  | 1.69E-02 | up   |
| PPP1R15A  | ENSG0000008707 | protein_coding       | 11.3949  | 15.4700  | 0.74 | -0.44 | 1.69E-02 | down |
| RUFY1     | ENSG0000017678 | protein_coding;no    | 4.4728   | 6.0403   | 0.74 | -0.43 | 1.69E-02 | down |
| TADA3     | ENSG0000017114 | retained_intron;proc | 19.9292  | 15.4356  | 1.29 | 0.37  | 1.70E-02 | up   |
| NPEPPS    | ENSG0000014127 | protein_coding;no    | 6.0173   | 4.6140   | 1.30 | 0.38  | 1.70E-02 | up   |
| DRAM2     | ENSG0000015617 | processed_transcri   | 16.9319  | 22.3914  | 0.76 | -0.40 | 1.70E-02 | down |
| SUV39H1   | ENSG0000010194 | protein_coding;proc  | 2.8639   | 4.7498   | 0.60 | -0.73 | 1.70E-02 | down |
| PKIG      | ENSG0000016873 | protein_coding;proc  | 0.6999   | 0.3377   | 2.07 | 1.05  | 1.71E-02 | up   |
| ROMO1     | ENSG0000012599 | protein_coding       | 36.7605  | 24.9721  | 1.47 | 0.56  | 1.71E-02 | up   |
| SENP6     | ENSG0000011270 | nonsense_mediate     | 6.2074   | 7.9608   | 0.78 | -0.36 | 1.71E-02 | down |
| LINC00339 | ENSG0000021851 | processed_transcri   | 0.5588   | 1.0054   | 0.56 | -0.85 | 1.71E-02 | down |
| IMPA1     | ENSG0000013373 | retained_intron;proc | 7.2962   | 9.6879   | 0.75 | -0.41 | 1.71E-02 | down |
| KIF21B    | ENSG0000011685 | protein_coding;ret   | 4.4577   | 3.1322   | 1.42 | 0.51  | 1.71E-02 | up   |
| MMP2      | ENSG0000008724 | protein_coding;no    | 1.0672   | 1.7416   | 0.61 | -0.71 | 1.71E-02 | down |
| PECAM1    | ENSG0000026137 | protein_coding;proc  | 6.9227   | 9.0315   | 0.77 | -0.38 | 1.71E-02 | down |
| EMP3      | ENSG0000014222 | protein_coding;ret   | 50.4037  | 38.5569  | 1.31 | 0.39  | 1.72E-02 | up   |
| ARHGEF5   | ENSG0000005032 | protein_coding       | 0.1447   | 0.0404   | 3.58 | 1.84  | 1.72E-02 | up   |
| MR1       | ENSG0000015302 | protein_coding;proc  | 3.1332   | 1.8804   | 1.67 | 0.74  | 1.72E-02 | up   |
| MEF2B     | ENSG0000021399 | protein_coding       | 0.8188   | 0.2641   | 3.10 | 1.63  | 1.73E-02 | up   |
| PPM1L     | ENSG0000016359 | protein_coding;proc  | 1.0479   | 0.6891   | 1.52 | 0.60  | 1.73E-02 | up   |
| ARFGEF2   | ENSG0000012419 | protein_coding;proc  | 7.2114   | 9.3217   | 0.77 | -0.37 | 1.73E-02 | down |
| LINC01222 | ENSG0000023341 | lincRNA              | 1.1097   | 0.5281   | 2.10 | 1.07  | 1.76E-02 | up   |
| ATP1B3    | ENSG0000006984 | protein_coding;ret   | 53.4200  | 39.1985  | 1.36 | 0.45  | 1.76E-02 | up   |
| HNRNPAB   | ENSG0000019745 | protein_coding;ret   | 72.3340  | 92.2299  | 0.78 | -0.35 | 1.76E-02 | down |
| CMSS1     | ENSG0000018422 | protein_coding;proc  | 7.3909   | 9.5159   | 0.78 | -0.36 | 1.76E-02 | down |
| CILP2     | ENSG0000016016 | protein_coding;proc  | 2.6393   | 1.7065   | 1.55 | 0.63  | 1.77E-02 | up   |
| TOP1MT    | ENSG0000018442 | protein_coding;ret   | 14.0770  | 18.1312  | 0.78 | -0.37 | 1.77E-02 | down |
| SIGLEC14  | ENSG0000025441 | protein_coding;ret   | 4.1370   | 2.6183   | 1.58 | 0.66  | 1.77E-02 | up   |
| COPS7A    | ENSG0000011165 | protein_coding;no    | 6.6069   | 9.2842   | 0.71 | -0.49 | 1.78E-02 | down |
| PSMD1     | ENSG0000017369 | protein_coding;ret   | 15.5331  | 11.8939  | 1.31 | 0.39  | 1.78E-02 | up   |
| CDC6      | ENSG0000009480 | protein_coding;ret   | 11.1293  | 8.5388   | 1.30 | 0.38  | 1.78E-02 | up   |
| AC093323  | ENSG0000017084 | nonsense_mediate     | 8.8733   | 11.7750  | 0.75 | -0.41 | 1.78E-02 | down |
| AC121761  | ENSG0000025749 | antisense            | 0.6055   | 1.2487   | 0.48 | -1.04 | 1.78E-02 | down |
| FTH1P11   | ENSG0000023726 | processed_pseudo     | 3.3670   | 1.5824   | 2.13 | 1.09  | 1.79E-02 | up   |
| TNFRSF9   | ENSG0000004924 | protein_coding;no    | 0.1097   | 0.0414   | 2.65 | 1.41  | 1.79E-02 | up   |
| RPL7      | ENSG0000014760 | protein_coding;ret   | 533.2017 | 690.1498 | 0.77 | -0.37 | 1.80E-02 | down |
| DENND4C   | ENSG0000013714 | protein_coding;no    | 1.6397   | 1.1054   | 1.48 | 0.57  | 1.80E-02 | up   |
| CSK       | ENSG0000010365 | protein_coding;ret   | 7.3692   | 9.8514   | 0.75 | -0.42 | 1.80E-02 | down |
| ZC3H12A   | ENSG0000016387 | protein_coding;no    | 3.3219   | 2.1151   | 1.57 | 0.65  | 1.81E-02 | up   |
| PMF1-BGLA | ENSG0000026023 | protein_coding       | 9.0689   | 4.0958   | 2.21 | 1.15  | 1.81E-02 | up   |
| LYAR      | ENSG0000014522 | protein_coding;ret   | 23.9590  | 31.5536  | 0.76 | -0.40 | 1.81E-02 | down |
| SARS      | ENSG0000003169 | protein_coding;proc  | 19.4402  | 24.9530  | 0.78 | -0.36 | 1.82E-02 | down |
| GOLGA8N   | ENSG0000023265 | protein_coding;ret   | 2.2190   | 3.2551   | 0.68 | -0.55 | 1.83E-02 | down |



|          |                |                     |          |          |      |       |          |      |
|----------|----------------|---------------------|----------|----------|------|-------|----------|------|
| CCDC30   | ENSG0000018640 | processed_transcri  | 0.0288   | 0.0614   | 0.47 | -1.09 | 1.83E-02 | down |
| ZNF815P  | ENSG0000023594 | transcribed_unpro   | 1.8183   | 1.0097   | 1.80 | 0.85  | 1.83E-02 | up   |
| RAN      | ENSG0000013234 | protein_coding;ret  | 61.3288  | 80.3325  | 0.76 | -0.39 | 1.83E-02 | down |
| TMBIM4   | ENSG0000015595 | nonsense_mediate    | 11.6804  | 15.1061  | 0.77 | -0.37 | 1.84E-02 | down |
| GCNT2    | ENSG0000011184 | processed_transcri  | 0.0850   | 0.0380   | 2.24 | 1.16  | 1.84E-02 | up   |
| ECHDC1   | ENSG0000009314 | nonsense_mediate    | 7.9865   | 10.4595  | 0.76 | -0.39 | 1.84E-02 | down |
| ZEB2     | ENSG0000016955 | protein_coding;ret  | 3.1891   | 4.3908   | 0.73 | -0.46 | 1.84E-02 | down |
| AD000671 | ENSG0000026712 | nonsense_mediate    | 0.9694   | 0.4265   | 2.27 | 1.18  | 1.84E-02 | up   |
| KARS     | ENSG0000006542 | protein_coding;no   | 47.1794  | 59.9888  | 0.79 | -0.35 | 1.85E-02 | down |
| REPS2    | ENSG0000016989 | protein_coding;prc  | 0.1373   | 0.0500   | 2.75 | 1.46  | 1.85E-02 | up   |
| CEP95    | ENSG0000025889 | retained_intron;no  | 4.5520   | 6.0007   | 0.76 | -0.40 | 1.86E-02 | down |
| LRP10    | ENSG0000019732 | protein_coding;ret  | 4.2933   | 2.9861   | 1.44 | 0.52  | 1.86E-02 | up   |
| ST7L     | ENSG0000000734 | nonsense_mediate    | 1.5653   | 2.2844   | 0.69 | -0.55 | 1.86E-02 | down |
| AC119396 | ENSG0000026326 | protein_coding      | 3.1953   | 1.9064   | 1.68 | 0.75  | 1.86E-02 | up   |
| POC5     | ENSG0000015235 | protein_coding;ret  | 3.2224   | 4.7239   | 0.68 | -0.55 | 1.86E-02 | down |
| NUMA1    | ENSG0000013749 | protein_coding;ret  | 4.3356   | 3.2559   | 1.33 | 0.41  | 1.86E-02 | up   |
| CENPA    | ENSG0000011516 | protein_coding;prc  | 2.7621   | 4.7875   | 0.58 | -0.79 | 1.87E-02 | down |
| TMEM183B | ENSG0000022483 | processed_pseudo;   | 4.3093   | 6.8540   | 0.63 | -0.67 | 1.87E-02 | down |
| RPL7P32  | ENSG0000023100 | processed_pseudo;   | 8.3818   | 13.0044  | 0.64 | -0.63 | 1.87E-02 | down |
| CD14     | ENSG0000017045 | protein_coding      | 35.5167  | 25.9471  | 1.37 | 0.45  | 1.87E-02 | up   |
| TTK      | ENSG0000011274 | protein_coding;ret  | 10.4967  | 13.5348  | 0.78 | -0.37 | 1.87E-02 | down |
| FEN1     | ENSG0000016849 | protein_coding      | 91.7891  | 71.4740  | 1.28 | 0.36  | 1.88E-02 | up   |
| HIRIP3   | ENSG0000014992 | protein_coding;ret  | 19.0857  | 14.6203  | 1.31 | 0.38  | 1.88E-02 | up   |
| ZNF528   | ENSG0000016755 | protein_coding;ret  | 2.4848   | 1.5275   | 1.63 | 0.70  | 1.88E-02 | up   |
| RPSAP14  | ENSG0000023398 | processed_pseudo;   | 3.7634   | 1.8121   | 2.08 | 1.05  | 1.88E-02 | up   |
| TSPAN31  | ENSG0000013545 | protein_coding;ret  | 4.0512   | 2.2965   | 1.76 | 0.82  | 1.89E-02 | up   |
| ZYG11B   | ENSG0000016237 | protein_coding      | 3.2473   | 2.3151   | 1.40 | 0.49  | 1.89E-02 | up   |
| TPGS2    | ENSG0000013477 | nonsense_mediate    | 12.7352  | 9.8346   | 1.29 | 0.37  | 1.89E-02 | up   |
| MTURN    | ENSG0000018035 | protein_coding      | 3.7720   | 1.6659   | 2.26 | 1.18  | 1.90E-02 | up   |
| ACOX1    | ENSG0000016153 | protein_coding;ret  | 3.2482   | 2.2981   | 1.41 | 0.50  | 1.90E-02 | up   |
| LAMTOR4  | ENSG0000018818 | protein_coding;prc  | 28.1587  | 21.2261  | 1.33 | 0.41  | 1.90E-02 | up   |
| RPS13    | ENSG0000011070 | protein_coding;prc  | 321.7401 | 411.9073 | 0.78 | -0.36 | 1.91E-02 | down |
| AC009090 | ENSG0000027980 | TEC                 | 0.4033   | 0.1769   | 2.28 | 1.19  | 1.91E-02 | up   |
| MARCH1   | ENSG0000014541 | protein_coding;ret  | 1.1459   | 1.7196   | 0.67 | -0.59 | 1.91E-02 | down |
| MBP      | ENSG0000019797 | processed_transcri  | 6.8584   | 8.7376   | 0.78 | -0.35 | 1.91E-02 | down |
| BCKDK    | ENSG0000010350 | retained_intron;prc | 7.1081   | 5.0451   | 1.41 | 0.49  | 1.91E-02 | up   |
| PRXL2B   | ENSG0000015787 | protein_coding;ret  | 4.0330   | 1.8713   | 2.16 | 1.11  | 1.91E-02 | up   |
| RPRD2    | ENSG0000016312 | protein_coding;prc  | 7.2311   | 5.5526   | 1.30 | 0.38  | 1.92E-02 | up   |
| IFNGR1   | ENSG0000002769 | protein_coding;no   | 34.6341  | 49.6655  | 0.70 | -0.52 | 1.93E-02 | down |
| B3GALT4  | ENSG0000023586 | protein_coding;prc  | 0.4920   | 0.2214   | 2.22 | 1.15  | 1.93E-02 | up   |
| PLEKHG2  | ENSG0000009092 | protein_coding;ret  | 0.0939   | 0.2053   | 0.46 | -1.13 | 1.94E-02 | down |
| DLEU1    | ENSG0000017612 | lincRNA;processe    | 0.6041   | 0.8731   | 0.69 | -0.53 | 1.94E-02 | down |
| SIPA1L2  | ENSG0000011699 | protein_coding;prc  | 0.4356   | 0.7089   | 0.61 | -0.70 | 1.94E-02 | down |
| NUP188   | ENSG0000009531 | retained_intron;prc | 10.2366  | 7.8963   | 1.30 | 0.37  | 1.94E-02 | up   |
| PXN-AS1  | ENSG0000025585 | antisense           | 1.4694   | 0.8466   | 1.74 | 0.80  | 1.94E-02 | up   |
| PRKACB   | ENSG0000014287 | protein_coding;prc  | 5.4003   | 7.0650   | 0.76 | -0.39 | 1.95E-02 | down |
| CITED2   | ENSG0000016444 | protein_coding      | 39.8822  | 51.4232  | 0.78 | -0.37 | 1.95E-02 | down |
| KCTD1    | ENSG0000013450 | protein_coding;prc  | 0.2291   | 0.1098   | 2.09 | 1.06  | 1.95E-02 | up   |

|          |                |                      |          |          |      |       |          |      |
|----------|----------------|----------------------|----------|----------|------|-------|----------|------|
| HCN3     | ENSG0000014363 | protein_coding;proc  | 0.7655   | 0.4254   | 1.80 | 0.85  | 1.95E-02 | up   |
| LRP6     | ENSG0000007001 | nonsense_mediate     | 0.9526   | 0.6166   | 1.54 | 0.63  | 1.95E-02 | up   |
| EEF1B2P6 | ENSG0000021326 | processed_pseudo;    | 4.4417   | 7.2519   | 0.61 | -0.71 | 1.95E-02 | down |
| RPL26L1  | ENSG0000003724 | protein_coding       | 11.1123  | 16.2206  | 0.69 | -0.55 | 1.95E-02 | down |
| KRAS     | ENSG0000013370 | protein_coding       | 5.2737   | 6.9006   | 0.76 | -0.39 | 1.96E-02 | down |
| KIAA1755 | ENSG0000014963 | protein_coding;ret   | 0.2824   | 0.1268   | 2.23 | 1.16  | 1.97E-02 | up   |
| BCLAF1P2 | ENSG0000027980 | processed_pseudo;    | 1.3651   | 2.4732   | 0.55 | -0.86 | 1.97E-02 | down |
| MALT1    | ENSG0000017217 | protein_coding;no    | 3.5264   | 2.3230   | 1.52 | 0.60  | 1.98E-02 | up   |
| MAP2K5   | ENSG0000013776 | protein_coding;ret   | 1.2628   | 1.9448   | 0.65 | -0.62 | 1.98E-02 | down |
| MYDGF    | ENSG0000007484 | protein_coding;ret   | 62.7469  | 47.6070  | 1.32 | 0.40  | 1.98E-02 | up   |
| WDR7     | ENSG0000009115 | protein_coding;proc  | 2.1454   | 1.5271   | 1.40 | 0.49  | 1.99E-02 | up   |
| RPS6     | ENSG0000013715 | protein_coding;proc  | 515.0162 | 652.2649 | 0.79 | -0.34 | 1.99E-02 | down |
| SUCNR1   | ENSG0000019882 | protein_coding       | 79.3160  | 61.5173  | 1.29 | 0.37  | 1.99E-02 | up   |
| TUBA1B   | ENSG0000012341 | protein_coding;ret   | 677.4952 | 519.1777 | 1.30 | 0.38  | 1.99E-02 | up   |
| CCL3L1   | ENSG0000027608 | retained_intron;proc | 0.3696   | 0.7660   | 0.48 | -1.05 | 1.99E-02 | down |
| VAV2     | ENSG0000016029 | protein_coding;proc  | 0.3595   | 0.6159   | 0.58 | -0.78 | 2.00E-02 | down |
| PHTF2    | ENSG0000000657 | protein_coding;proc  | 1.9835   | 1.3505   | 1.47 | 0.55  | 2.00E-02 | up   |
| NDRG1    | ENSG0000010441 | retained_intron;proc | 7.6267   | 10.0022  | 0.76 | -0.39 | 2.00E-02 | down |
| AAMDC    | ENSG0000008788 | protein_coding;no    | 4.0033   | 2.4820   | 1.61 | 0.69  | 2.01E-02 | up   |
| ZNF766   | ENSG0000019621 | protein_coding;ret   | 2.6134   | 4.4485   | 0.59 | -0.77 | 2.01E-02 | down |
| DCTN5    | ENSG0000016684 | protein_coding;ret   | 5.9160   | 3.4108   | 1.73 | 0.79  | 2.01E-02 | up   |
| SPACA6   | ENSG0000018231 | retained_intron;proc | 0.4339   | 0.2116   | 2.05 | 1.04  | 2.02E-02 | up   |
| FSCN1    | ENSG0000007561 | protein_coding;ret   | 0.3090   | 0.6194   | 0.50 | -1.00 | 2.02E-02 | down |
| CNPY4    | ENSG0000016699 | processed_transcri   | 3.8680   | 2.4569   | 1.57 | 0.65  | 2.02E-02 | up   |
| CWC27    | ENSG0000015301 | protein_coding;proc  | 6.4582   | 8.8364   | 0.73 | -0.45 | 2.02E-02 | down |
| LAPTM4A  | ENSG0000006869 | protein_coding;ret   | 46.7361  | 36.0584  | 1.30 | 0.37  | 2.04E-02 | up   |
| RF02103  | ENSG0000027608 | misc_RNA             | 16.4746  | 27.4568  | 0.60 | -0.74 | 2.04E-02 | down |
| TRIB2    | ENSG0000007157 | protein_coding;proc  | 1.3557   | 0.8276   | 1.64 | 0.71  | 2.05E-02 | up   |
| EDEM2    | ENSG0000008829 | protein_coding       | 22.7557  | 17.2961  | 1.32 | 0.40  | 2.05E-02 | up   |
| SELPLG   | ENSG0000011087 | protein_coding       | 49.2355  | 38.3332  | 1.28 | 0.36  | 2.05E-02 | up   |
| SIRPB1   | ENSG0000010130 | protein_coding;no    | 14.3524  | 11.1931  | 1.28 | 0.36  | 2.05E-02 | up   |
| MAZ      | ENSG0000010349 | retained_intron;proc | 21.0061  | 28.6315  | 0.73 | -0.45 | 2.06E-02 | down |
| GSTM3    | ENSG0000013420 | protein_coding;proc  | 0.3607   | 0.6410   | 0.56 | -0.83 | 2.06E-02 | down |
| AC024293 | ENSG0000024431 | processed_pseudo;    | 133.2630 | 175.2268 | 0.76 | -0.39 | 2.06E-02 | down |
| NRBP1    | ENSG0000011521 | protein_coding;ret   | 18.1377  | 14.2514  | 1.27 | 0.35  | 2.08E-02 | up   |
| NONO     | ENSG0000014714 | protein_coding;proc  | 44.5001  | 58.9162  | 0.76 | -0.40 | 2.10E-02 | down |
| AL121832 | ENSG0000027543 | sense_intronic       | 0.3894   | 0.1773   | 2.20 | 1.13  | 2.10E-02 | up   |
| TLN1     | ENSG0000013707 | protein_coding;ret   | 13.7594  | 10.4380  | 1.32 | 0.40  | 2.10E-02 | up   |
| OFD1     | ENSG0000004665 | protein_coding;proc  | 8.3768   | 10.9974  | 0.76 | -0.39 | 2.10E-02 | down |
| GDF11    | ENSG0000013541 | protein_coding       | 0.7069   | 1.0952   | 0.65 | -0.63 | 2.10E-02 | down |
| DHTKD1   | ENSG0000018119 | protein_coding;ret   | 2.2330   | 1.4736   | 1.52 | 0.60  | 2.10E-02 | up   |
| DMXL2    | ENSG0000010409 | protein_coding;ret   | 7.5392   | 9.6714   | 0.78 | -0.36 | 2.10E-02 | down |
| RPL3P4   | ENSG0000023257 | processed_pseudo;    | 578.3743 | 733.1482 | 0.79 | -0.34 | 2.11E-02 | down |
| FAM241A  | ENSG0000017474 | protein_coding       | 1.8471   | 2.6038   | 0.71 | -0.50 | 2.12E-02 | down |
| MIA3     | ENSG0000015430 | protein_coding;proc  | 11.5126  | 8.9322   | 1.29 | 0.37  | 2.12E-02 | up   |
| MTHFS    | ENSG0000013637 | protein_coding;no    | 0.7999   | 1.5062   | 0.53 | -0.91 | 2.12E-02 | down |
| INAFM2   | ENSG0000025933 | protein_coding;proc  | 4.9419   | 7.0687   | 0.70 | -0.52 | 2.13E-02 | down |
| ZNF496   | ENSG0000016271 | processed_transcri   | 2.5088   | 3.3597   | 0.75 | -0.42 | 2.13E-02 | down |

|           |                |                     |           |           |      |       |          |      |
|-----------|----------------|---------------------|-----------|-----------|------|-------|----------|------|
| AC006033  | ENSG0000027290 | lincRNA             | 1.3131    | 2.1856    | 0.60 | -0.74 | 2.13E-02 | down |
| CCDC28B   | ENSG0000016005 | protein_coding;no   | 0.6531    | 0.3211    | 2.03 | 1.02  | 2.14E-02 | up   |
| AC021078  | ENSG0000023055 | retained_intron     | 4.2997    | 5.6089    | 0.77 | -0.38 | 2.14E-02 | down |
| NAP1L1    | ENSG0000018710 | nonsense_mediate    | 37.1441   | 47.3851   | 0.78 | -0.35 | 2.14E-02 | down |
| SPTLC2    | ENSG0000010059 | protein_coding;ret  | 4.1500    | 3.1139    | 1.33 | 0.41  | 2.15E-02 | up   |
| G3BP2     | ENSG0000013875 | protein_coding;pro  | 28.2588   | 21.3952   | 1.32 | 0.40  | 2.15E-02 | up   |
| NT5C3A    | ENSG0000012264 | protein_coding;no   | 12.9839   | 19.1141   | 0.68 | -0.56 | 2.15E-02 | down |
| TRIM45    | ENSG0000013425 | protein_coding;no   | 0.4747    | 0.2188    | 2.17 | 1.12  | 2.16E-02 | up   |
| CYCS      | ENSG0000017211 | protein_coding      | 60.8428   | 77.8817   | 0.78 | -0.36 | 2.16E-02 | down |
| TMX4      | ENSG0000012582 | protein_coding;no   | 13.2225   | 10.3572   | 1.28 | 0.35  | 2.17E-02 | up   |
| MYPOP     | ENSG0000017618 | protein_coding      | 1.8499    | 1.0333    | 1.79 | 0.84  | 2.18E-02 | up   |
| SELL      | ENSG0000018840 | protein_coding;pro  | 1.1763    | 0.6782    | 1.73 | 0.79  | 2.18E-02 | up   |
| C9orf85   | ENSG0000015562 | protein_coding;no   | 2.1677    | 3.1618    | 0.69 | -0.54 | 2.18E-02 | down |
| YARS      | ENSG0000013468 | protein_coding;pro  | 14.0985   | 18.1707   | 0.78 | -0.37 | 2.18E-02 | down |
| DNAJC11   | ENSG0000000792 | protein_coding;pro  | 11.5542   | 8.8779    | 1.30 | 0.38  | 2.18E-02 | up   |
| MZT1      | ENSG0000020489 | protein_coding      | 17.5970   | 23.3851   | 0.75 | -0.41 | 2.19E-02 | down |
| TFG       | ENSG0000011435 | protein_coding;pro  | 11.7416   | 15.0224   | 0.78 | -0.36 | 2.19E-02 | down |
| PIP5K1A   | ENSG0000014339 | protein_coding;pro  | 5.5709    | 7.6377    | 0.73 | -0.46 | 2.19E-02 | down |
| IL18      | ENSG0000015078 | processed_transcri  | 7.3460    | 10.3541   | 0.71 | -0.50 | 2.20E-02 | down |
| TMEM9B    | ENSG0000017534 | protein_coding      | 8.2372    | 11.5181   | 0.72 | -0.48 | 2.20E-02 | down |
| FEM1B     | ENSG0000016901 | protein_coding      | 6.4609    | 8.2408    | 0.78 | -0.35 | 2.21E-02 | down |
| ZNF77     | ENSG0000017569 | protein_coding;pro  | 7.1577    | 4.8020    | 1.49 | 0.58  | 2.21E-02 | up   |
| IER3      | ENSG0000013733 | protein_coding      | 7.2175    | 4.6340    | 1.56 | 0.64  | 2.21E-02 | up   |
| IL3RA     | ENSG0000018529 | protein_coding      | 0.1710    | 0.6059    | 0.28 | -1.82 | 2.22E-02 | down |
| CCNG1     | ENSG0000011332 | protein_coding;ret  | 9.5154    | 12.6045   | 0.75 | -0.41 | 2.22E-02 | down |
| IER3IP1   | ENSG0000013404 | protein_coding      | 35.6456   | 27.9565   | 1.28 | 0.35  | 2.22E-02 | up   |
| CEMIP2    | ENSG0000013504 | protein_coding;ret  | 0.1514    | 0.0757    | 2.00 | 1.00  | 2.23E-02 | up   |
| ZNF879    | ENSG0000023428 | protein_coding      | 0.7654    | 0.4355    | 1.76 | 0.81  | 2.24E-02 | up   |
| EIF2S2P4  | ENSG0000012869 | processed_pseudo    | 13.3094   | 19.1581   | 0.69 | -0.53 | 2.24E-02 | down |
| AC093525  | ENSG0000026993 | antisense           | 0.5293    | 0.2782    | 1.90 | 0.93  | 2.24E-02 | up   |
| PGM1      | ENSG0000007973 | protein_coding;pro  | 17.2952   | 13.3838   | 1.29 | 0.37  | 2.24E-02 | up   |
| ICMT      | ENSG0000011623 | nonsense_mediate    | 16.7000   | 11.5294   | 1.45 | 0.53  | 2.24E-02 | up   |
| SNRNP200  | ENSG0000014402 | protein_coding;ret  | 21.3487   | 16.6310   | 1.28 | 0.36  | 2.25E-02 | up   |
| ZCCHC8    | ENSG0000003303 | protein_coding;ret  | 4.9010    | 6.4720    | 0.76 | -0.40 | 2.25E-02 | down |
| DBNDD2    | ENSG0000024427 | protein_coding      | 6.1960    | 4.1915    | 1.48 | 0.56  | 2.25E-02 | up   |
| SNN       | ENSG0000018460 | protein_coding      | 5.4137    | 3.7518    | 1.44 | 0.53  | 2.25E-02 | up   |
| MTMR3     | ENSG0000010033 | protein_coding;ret  | 5.0613    | 3.8473    | 1.32 | 0.40  | 2.27E-02 | up   |
| ABCE1     | ENSG0000016416 | protein_coding;no   | 22.9670   | 29.0624   | 0.79 | -0.34 | 2.27E-02 | down |
| HSD17B7P2 | ENSG0000009925 | processed_transcri  | 0.9986    | 0.5048    | 1.98 | 0.98  | 2.27E-02 | up   |
| DEFA1     | ENSG0000020604 | protein_coding      | 2124.8753 | 2732.3319 | 0.78 | -0.36 | 2.28E-02 | down |
| ZNF451    | ENSG0000011220 | retained_intron;pro | 2.3182    | 3.0292    | 0.77 | -0.39 | 2.28E-02 | down |
| TOP2B     | ENSG0000007709 | protein_coding;no   | 40.8773   | 51.6448   | 0.79 | -0.34 | 2.28E-02 | down |
| MRRF      | ENSG0000014818 | nonsense_mediate    | 2.8306    | 4.0762    | 0.69 | -0.53 | 2.28E-02 | down |
| SMIM3     | ENSG0000025623 | protein_coding      | 25.8318   | 32.9103   | 0.78 | -0.35 | 2.28E-02 | down |
| TMEM179B  | ENSG0000018547 | protein_coding;ret  | 18.0700   | 13.0323   | 1.39 | 0.47  | 2.29E-02 | up   |
| MTPAP     | ENSG0000010795 | protein_coding;pro  | 5.6434    | 7.2023    | 0.78 | -0.35 | 2.29E-02 | down |
| TPK1      | ENSG0000019651 | protein_coding;no   | 0.4828    | 0.7758    | 0.62 | -0.68 | 2.30E-02 | down |
| LDLRAD2   | ENSG0000018794 | protein_coding;pro  | 1.0035    | 0.5266    | 1.91 | 0.93  | 2.30E-02 | up   |

|           |                |                     |          |          |      |       |          |      |
|-----------|----------------|---------------------|----------|----------|------|-------|----------|------|
| ELOVL3    | ENSG0000011991 | protein_coding      | 2.7412   | 1.5968   | 1.72 | 0.78  | 2.30E-02 | up   |
| DIP2A     | ENSG0000016030 | retained_intron;pro | 2.4781   | 1.7735   | 1.40 | 0.48  | 2.31E-02 | up   |
| AC147651  | ENSG0000023718 | antisense           | 2.0952   | 3.9210   | 0.53 | -0.90 | 2.32E-02 | down |
| RAB28     | ENSG0000015786 | protein_coding;no   | 8.6491   | 12.0488  | 0.72 | -0.48 | 2.32E-02 | down |
| BAMBI     | ENSG0000009573 | protein_coding;ret  | 1.5957   | 0.9329   | 1.71 | 0.77  | 2.32E-02 | up   |
| MMP15     | ENSG0000010299 | protein_coding      | 1.1965   | 0.7399   | 1.62 | 0.69  | 2.33E-02 | up   |
| NUP37     | ENSG0000007518 | protein_coding;ret  | 10.3390  | 13.6013  | 0.76 | -0.40 | 2.33E-02 | down |
| APOC2     | ENSG0000023490 | protein_coding      | 18.8516  | 12.4549  | 1.51 | 0.60  | 2.33E-02 | up   |
| DERL3     | ENSG0000009995 | protein_coding;ret  | 3.7725   | 2.5080   | 1.50 | 0.59  | 2.33E-02 | up   |
| MARC1     | ENSG0000018620 | protein_coding;pro  | 1.6341   | 1.1180   | 1.46 | 0.55  | 2.33E-02 | up   |
| NUDT1     | ENSG0000010626 | protein_coding;pro  | 28.9884  | 22.2064  | 1.31 | 0.38  | 2.34E-02 | up   |
| ZNF428    | ENSG0000013111 | protein_coding;ret  | 13.6780  | 9.4394   | 1.45 | 0.54  | 2.34E-02 | up   |
| BOLA1     | ENSG0000017809 | protein_coding;pro  | 3.4323   | 2.0189   | 1.70 | 0.77  | 2.34E-02 | up   |
| AP006621  | ENSG0000025528 | lincRNA             | 1.5581   | 0.8108   | 1.92 | 0.94  | 2.34E-02 | up   |
| ANKRD28   | ENSG0000020656 | processed_transcri  | 3.7488   | 5.1437   | 0.73 | -0.46 | 2.35E-02 | down |
| MRPL53    | ENSG0000020482 | protein_coding;ret  | 6.0270   | 11.0551  | 0.55 | -0.88 | 2.35E-02 | down |
| QTRT2     | ENSG0000015157 | retained_intron;pro | 1.9057   | 3.1483   | 0.61 | -0.72 | 2.36E-02 | down |
| MVD       | ENSG0000016750 | protein_coding;ret  | 2.1542   | 1.3811   | 1.56 | 0.64  | 2.36E-02 | up   |
| TAF10     | ENSG0000016633 | retained_intron;pro | 7.6252   | 5.8138   | 1.31 | 0.39  | 2.36E-02 | up   |
| FAM221A   | ENSG0000018873 | retained_intron;no  | 0.1888   | 0.0926   | 2.04 | 1.03  | 2.37E-02 | up   |
| ASAH2     | ENSG0000018861 | protein_coding;no   | 0.2096   | 0.1036   | 2.02 | 1.02  | 2.38E-02 | up   |
| APOE      | ENSG0000013020 | protein_coding;ret  | 0.5324   | 0.9874   | 0.54 | -0.89 | 2.38E-02 | down |
| ERCC5     | ENSG0000013489 | protein_coding;ret  | 7.7639   | 9.9411   | 0.78 | -0.36 | 2.38E-02 | down |
| SIGLEC17P | ENSG0000017110 | processed_transcri  | 1.4098   | 2.3568   | 0.60 | -0.74 | 2.38E-02 | down |
| PLAGL2    | ENSG0000012600 | protein_coding      | 5.6508   | 7.4373   | 0.76 | -0.40 | 2.38E-02 | down |
| AASDH     | ENSG0000015742 | protein_coding;no   | 2.8323   | 4.0427   | 0.70 | -0.51 | 2.39E-02 | down |
| CCNQ      | ENSG0000026291 | protein_coding;no   | 3.4420   | 5.4674   | 0.63 | -0.67 | 2.39E-02 | down |
| CD3EAP    | ENSG0000011787 | protein_coding      | 3.4959   | 2.0035   | 1.74 | 0.80  | 2.39E-02 | up   |
| TREML2    | ENSG0000011219 | protein_coding      | 4.6327   | 3.1944   | 1.45 | 0.54  | 2.39E-02 | up   |
| KIF13A    | ENSG0000013717 | protein_coding;pro  | 0.4375   | 0.2627   | 1.67 | 0.74  | 2.40E-02 | up   |
| AC005076  | ENSG0000022404 | antisense           | 1.6095   | 0.7813   | 2.06 | 1.04  | 2.40E-02 | up   |
| TRAM2     | ENSG0000006530 | protein_coding      | 2.8323   | 1.9780   | 1.43 | 0.52  | 2.41E-02 | up   |
| SERPINE2  | ENSG0000013591 | protein_coding;ret  | 0.2099   | 0.0897   | 2.34 | 1.23  | 2.41E-02 | up   |
| AC116533  | ENSG0000024439 | processed_pseudo;   | 678.8471 | 857.9099 | 0.79 | -0.34 | 2.41E-02 | down |
| TRGC2     | ENSG0000022719 | TR_C_gene           | 58.7835  | 75.4646  | 0.78 | -0.36 | 2.41E-02 | down |
| AC107075  | ENSG0000027799 | unprocessed_pseu    | 4.9052   | 8.7567   | 0.56 | -0.84 | 2.41E-02 | down |
| QSOX1     | ENSG0000011626 | protein_coding;no   | 14.3162  | 10.8944  | 1.31 | 0.39  | 2.41E-02 | up   |
| SH3BGR    | ENSG0000018543 | protein_coding      | 0.2927   | 0.7422   | 0.39 | -1.34 | 2.42E-02 | down |
| C6orf163  | ENSG0000020387 | protein_coding;pro  | 0.7005   | 0.3611   | 1.94 | 0.96  | 2.42E-02 | up   |
| KREMEN1   | ENSG0000018376 | protein_coding;pro  | 0.1908   | 0.0922   | 2.07 | 1.05  | 2.43E-02 | up   |
| MMP25-AS  | ENSG0000026197 | antisense           | 0.7018   | 0.4250   | 1.65 | 0.72  | 2.44E-02 | up   |
| VMP1      | ENSG0000006271 | retained_intron;pro | 7.9419   | 10.3255  | 0.77 | -0.38 | 2.44E-02 | down |
| SSH1      | ENSG0000008411 | nonsense_mediate    | 1.7723   | 1.2659   | 1.40 | 0.49  | 2.44E-02 | up   |
| MTMR1     | ENSG0000006360 | retained_intron;pro | 5.1545   | 3.7793   | 1.36 | 0.45  | 2.44E-02 | up   |
| PLXND1    | ENSG0000000439 | retained_intron;pro | 7.1741   | 5.2522   | 1.37 | 0.45  | 2.44E-02 | up   |
| RHBDD1    | ENSG0000014446 | protein_coding;ret  | 3.2113   | 4.4119   | 0.73 | -0.46 | 2.44E-02 | down |
| UBTD1     | ENSG0000016588 | protein_coding      | 2.3921   | 1.4188   | 1.69 | 0.75  | 2.45E-02 | up   |
| RPS15A    | ENSG0000013441 | protein_coding;no   | 180.0384 | 226.9886 | 0.79 | -0.33 | 2.46E-02 | down |

|           |                |                     |           |           |      |       |          |      |
|-----------|----------------|---------------------|-----------|-----------|------|-------|----------|------|
| SNHG3     | ENSG0000024212 | retained_intron;lin | 16.0430   | 20.2623   | 0.79 | -0.34 | 2.46E-02 | down |
| ECM1      | ENSG0000014336 | processed_transcri  | 0.1721    | 0.3624    | 0.47 | -1.07 | 2.46E-02 | down |
| CFAP58    | ENSG0000012005 | protein_coding      | 0.7466    | 1.2582    | 0.59 | -0.75 | 2.47E-02 | down |
| AC140134  | ENSG0000017997 | unprocessed_pseu    | 0.6070    | 1.0177    | 0.60 | -0.75 | 2.47E-02 | down |
| USB1      | ENSG0000010300 | retained_intron;pro | 4.6064    | 3.4662    | 1.33 | 0.41  | 2.47E-02 | up   |
| DNAJA2    | ENSG0000006934 | protein_coding;no   | 10.8723   | 13.7959   | 0.79 | -0.34 | 2.47E-02 | down |
| GALNS     | ENSG0000014101 | protein_coding;ret  | 2.5440    | 1.7325    | 1.47 | 0.55  | 2.48E-02 | up   |
| ERAP1     | ENSG0000016430 | protein_coding;ret  | 3.3104    | 2.3689    | 1.40 | 0.48  | 2.48E-02 | up   |
| ZNF410    | ENSG0000011972 | protein_coding;no   | 3.1038    | 4.6240    | 0.67 | -0.58 | 2.49E-02 | down |
| AC093668  | ENSG0000028498 | protein_coding      | 10.1815   | 4.5432    | 2.24 | 1.16  | 2.49E-02 | up   |
| FOLR3     | ENSG0000011020 | nonsense_mediate    | 1.9940    | 1.1231    | 1.78 | 0.83  | 2.49E-02 | up   |
| RSBN1     | ENSG0000008101 | protein_coding;no   | 3.6221    | 4.8965    | 0.74 | -0.43 | 2.49E-02 | down |
| INPP1     | ENSG0000015168 | protein_coding;pro  | 2.8636    | 1.8021    | 1.59 | 0.67  | 2.50E-02 | up   |
| MT-ND1    | ENSG0000019888 | protein_coding      | #####     | 8314.2769 | 1.29 | 0.37  | 2.50E-02 | up   |
| ZDHHC2    | ENSG0000010421 | protein_coding;ret  | 17.0813   | 21.4765   | 0.80 | -0.33 | 2.51E-02 | down |
| INKA2     | ENSG0000019785 | protein_coding;pro  | 1.6714    | 1.0831    | 1.54 | 0.63  | 2.51E-02 | up   |
| OSM       | ENSG0000009998 | protein_coding      | 0.2273    | 0.4921    | 0.46 | -1.11 | 2.51E-02 | down |
| BATF3     | ENSG0000012368 | protein_coding;pro  | 0.3258    | 0.7127    | 0.46 | -1.13 | 2.51E-02 | down |
| BCL2L2    | ENSG0000012947 | protein_coding      | 2.2873    | 6.8072    | 0.34 | -1.57 | 2.52E-02 | down |
| CBR3-AS1  | ENSG0000023683 | antisense;retained_ | 0.1551    | 0.0577    | 2.69 | 1.43  | 2.53E-02 | up   |
| IFT81     | ENSG0000012297 | protein_coding;pro  | 0.1857    | 0.3432    | 0.54 | -0.89 | 2.53E-02 | down |
| CES4A     | ENSG0000017282 | retained_intron;no  | 0.2404    | 0.0981    | 2.45 | 1.29  | 2.53E-02 | up   |
| CDS2      | ENSG0000010129 | protein_coding;pro  | 4.6634    | 3.6116    | 1.29 | 0.37  | 2.53E-02 | up   |
| EOGT      | ENSG0000016337 | protein_coding;ret  | 1.6589    | 1.0237    | 1.62 | 0.70  | 2.54E-02 | up   |
| AC009779  | ENSG0000025805 | antisense           | 2.2184    | 1.2477    | 1.78 | 0.83  | 2.54E-02 | up   |
| TMEM199   | ENSG0000024404 | protein_coding;ret  | 2.8528    | 1.7898    | 1.59 | 0.67  | 2.54E-02 | up   |
| ARHGAP17  | ENSG0000014075 | protein_coding;ret  | 2.5016    | 3.3524    | 0.75 | -0.42 | 2.55E-02 | down |
| RNH1      | ENSG0000002319 | protein_coding;no   | 10.4275   | 13.0794   | 0.80 | -0.33 | 2.55E-02 | down |
| AKAP8L    | ENSG0000001124 | retained_intron;no  | 8.2085    | 6.1940    | 1.33 | 0.41  | 2.55E-02 | up   |
| PIWIL4    | ENSG0000013462 | protein_coding;no   | 7.7306    | 10.1017   | 0.77 | -0.39 | 2.56E-02 | down |
| PMP22     | ENSG0000010909 | protein_coding;no   | 0.7070    | 1.2225    | 0.58 | -0.79 | 2.56E-02 | down |
| GPCPD1    | ENSG0000012577 | retained_intron;pro | 13.5848   | 17.0686   | 0.80 | -0.33 | 2.57E-02 | down |
| MT-ND5    | ENSG0000019878 | protein_coding      | 3584.9320 | 2809.2345 | 1.28 | 0.35  | 2.57E-02 | up   |
| CES1      | ENSG0000019884 | protein_coding;no   | 22.1667   | 17.2706   | 1.28 | 0.36  | 2.58E-02 | up   |
| AGPAT2    | ENSG0000016969 | retained_intron;pro | 13.9206   | 9.7821    | 1.42 | 0.51  | 2.58E-02 | up   |
| ATF4P3    | ENSG0000022821 | processed_pseudo;   | 1.6116    | 2.8204    | 0.57 | -0.81 | 2.58E-02 | down |
| HNRNPA1P  | ENSG0000022457 | processed_transcri  | 23.5123   | 30.5918   | 0.77 | -0.38 | 2.59E-02 | down |
| PDLIM7    | ENSG0000019692 | protein_coding;no   | 6.3216    | 4.5954    | 1.38 | 0.46  | 2.61E-02 | up   |
| HYPK      | ENSG0000024202 | protein_coding;pro  | 2.6410    | 1.1473    | 2.30 | 1.20  | 2.61E-02 | up   |
| RAD50     | ENSG0000011352 | protein_coding;no   | 3.7581    | 5.0176    | 0.75 | -0.42 | 2.62E-02 | down |
| TNFRSF10C | ENSG0000017353 | protein_coding;ret  | 2.7786    | 1.6461    | 1.69 | 0.76  | 2.62E-02 | up   |
| ARPC3P5   | ENSG0000021402 | processed_pseudo;   | 0.9497    | 1.9976    | 0.48 | -1.07 | 2.62E-02 | down |
| E2F1      | ENSG0000010141 | protein_coding      | 18.1039   | 13.6715   | 1.32 | 0.41  | 2.62E-02 | up   |
| ADH5P4    | ENSG0000023385 | processed_pseudo;   | 1.0397    | 0.5178    | 2.01 | 1.01  | 2.63E-02 | up   |
| SUSD1     | ENSG0000010686 | protein_coding;pro  | 4.5192    | 3.1185    | 1.45 | 0.54  | 2.65E-02 | up   |
| VLDLR-AS  | ENSG0000023640 | antisense           | 0.1713    | 0.3492    | 0.49 | -1.03 | 2.65E-02 | down |
| TXNL1     | ENSG0000009116 | protein_coding;no   | 9.4285    | 11.8620   | 0.79 | -0.33 | 2.66E-02 | down |
| ZNF596    | ENSG0000017274 | protein_coding;ret  | 0.2296    | 0.4732    | 0.49 | -1.04 | 2.66E-02 | down |

|           |                |                     |           |           |      |       |          |      |
|-----------|----------------|---------------------|-----------|-----------|------|-------|----------|------|
| BCAT2     | ENSG0000010555 | protein_coding;ret  | 6.6176    | 4.8082    | 1.38 | 0.46  | 2.66E-02 | up   |
| NDUFS7    | ENSG0000011528 | protein_coding;ret  | 4.6494    | 3.3860    | 1.37 | 0.46  | 2.66E-02 | up   |
| RNASE3    | ENSG0000016939 | protein_coding      | 6.7637    | 4.0266    | 1.68 | 0.75  | 2.66E-02 | up   |
| PSEN1     | ENSG0000008081 | protein_coding;no   | 5.0936    | 3.7294    | 1.37 | 0.45  | 2.66E-02 | up   |
| RUBCNL    | ENSG0000010244 | retained_intron;pro | 3.0796    | 2.1479    | 1.43 | 0.52  | 2.69E-02 | up   |
| EP400     | ENSG0000018349 | protein_coding;ret  | 1.4419    | 1.0186    | 1.42 | 0.50  | 2.69E-02 | up   |
| PITHD1    | ENSG0000005775 | protein_coding      | 42.9222   | 33.6841   | 1.27 | 0.35  | 2.70E-02 | up   |
| ACSL3     | ENSG0000012398 | protein_coding;ret  | 10.5123   | 8.2793    | 1.27 | 0.34  | 2.70E-02 | up   |
| FAM98A    | ENSG0000011981 | retained_intron;pro | 8.3436    | 6.3146    | 1.32 | 0.40  | 2.70E-02 | up   |
| STXBP5-AS | ENSG0000023345 | antisense           | 0.7824    | 1.2262    | 0.64 | -0.65 | 2.70E-02 | down |
| HRH2      | ENSG0000011374 | nonsense_mediate    | 2.9154    | 4.0974    | 0.71 | -0.49 | 2.71E-02 | down |
| TMEM273   | ENSG0000020416 | processed_transcri  | 0.1525    | 0.3106    | 0.49 | -1.03 | 2.71E-02 | down |
| MAGT1     | ENSG0000010215 | protein_coding;ret  | 14.5003   | 10.6765   | 1.36 | 0.44  | 2.71E-02 | up   |
| HNRNPA1   | ENSG0000013548 | protein_coding;ret  | 333.9275  | 417.1201  | 0.80 | -0.32 | 2.71E-02 | down |
| TARBP2    | ENSG0000013954 | nonsense_mediate    | 2.6882    | 3.8442    | 0.70 | -0.52 | 2.71E-02 | down |
| NOP9      | ENSG0000019694 | protein_coding;no   | 8.3382    | 6.2453    | 1.34 | 0.42  | 2.71E-02 | up   |
| PIP5K1C   | ENSG0000018611 | protein_coding;pro  | 1.6155    | 1.0289    | 1.57 | 0.65  | 2.72E-02 | up   |
| AC073111  | ENSG0000028469 | processed_transcri  | 0.3817    | 0.1675    | 2.28 | 1.19  | 2.72E-02 | up   |
| HILPDA    | ENSG0000013524 | protein_coding;pro  | 10.8875   | 7.7426    | 1.41 | 0.49  | 2.72E-02 | up   |
| MTF1      | ENSG0000018878 | protein_coding;pro  | 5.0453    | 3.8542    | 1.31 | 0.39  | 2.72E-02 | up   |
| GTF2IRD2E | ENSG0000017442 | protein_coding;ret  | 1.7975    | 1.2153    | 1.48 | 0.56  | 2.73E-02 | up   |
| DNAJB9    | ENSG0000012859 | protein_coding;pro  | 6.7673    | 9.4795    | 0.71 | -0.49 | 2.73E-02 | down |
| CLEC4D    | ENSG0000016652 | protein_coding      | 3.0048    | 4.5087    | 0.67 | -0.59 | 2.73E-02 | down |
| DHCR7     | ENSG0000017289 | retained_intron;pro | 9.3548    | 6.7133    | 1.39 | 0.48  | 2.73E-02 | up   |
| PUS1      | ENSG0000017719 | protein_coding;ret  | 4.1819    | 5.8859    | 0.71 | -0.49 | 2.74E-02 | down |
| HSPA1B    | ENSG0000020438 | protein_coding      | 3.1993    | 2.0593    | 1.55 | 0.64  | 2.74E-02 | up   |
| CCNJ      | ENSG0000010744 | protein_coding      | 7.3716    | 9.5499    | 0.77 | -0.37 | 2.74E-02 | down |
| TMEM19    | ENSG0000013929 | protein_coding      | 1.2570    | 2.0823    | 0.60 | -0.73 | 2.74E-02 | down |
| REPS1     | ENSG0000013559 | protein_coding;no   | 3.6123    | 4.7082    | 0.77 | -0.38 | 2.75E-02 | down |
| SLC26A11  | ENSG0000018104 | protein_coding;ret  | 0.5174    | 0.2824    | 1.83 | 0.87  | 2.76E-02 | up   |
| PPP1R26   | ENSG0000019642 | protein_coding;pro  | 0.3628    | 0.1964    | 1.85 | 0.89  | 2.76E-02 | up   |
| FAM234A   | ENSG0000016793 | protein_coding;ret  | 3.0313    | 2.0472    | 1.48 | 0.57  | 2.76E-02 | up   |
| RCN2      | ENSG0000011790 | protein_coding;ret  | 3.9077    | 5.0428    | 0.77 | -0.37 | 2.76E-02 | down |
| RPA1      | ENSG0000013238 | retained_intron;pro | 19.0841   | 15.0761   | 1.27 | 0.34  | 2.77E-02 | up   |
| RPS12     | ENSG0000011230 | retained_intron;pro | 2195.5031 | 2751.3218 | 0.80 | -0.33 | 2.77E-02 | down |
| PVRIG     | ENSG0000021341 | protein_coding;pro  | 0.5178    | 0.1227    | 4.22 | 2.08  | 2.77E-02 | up   |
| PAN2      | ENSG0000013547 | retained_intron;pro | 6.1098    | 7.7762    | 0.79 | -0.35 | 2.77E-02 | down |
| TRAF3IP2  | ENSG0000005697 | protein_coding;ret  | 2.5119    | 3.5747    | 0.70 | -0.51 | 2.77E-02 | down |
| AC104232  | ENSG0000025400 | lincRNA             | 7.2472    | 11.0509   | 0.66 | -0.61 | 2.78E-02 | down |
| FLNA      | ENSG0000019692 | protein_coding;ret  | 30.3545   | 23.0535   | 1.32 | 0.40  | 2.78E-02 | up   |
| DEF8      | ENSG0000014099 | protein_coding;ret  | 2.7249    | 1.6518    | 1.65 | 0.72  | 2.79E-02 | up   |
| SLX1A-SUI | ENSG0000021359 | processed_transcri  | 1.4892    | 0.8040    | 1.85 | 0.89  | 2.79E-02 | up   |
| PIGW      | ENSG0000027716 | protein_coding      | 3.2303    | 5.1000    | 0.63 | -0.66 | 2.79E-02 | down |
| TMEM41A   | ENSG0000016390 | protein_coding;pro  | 1.2824    | 1.8434    | 0.70 | -0.52 | 2.81E-02 | down |
| ALG11     | ENSG0000025371 | protein_coding;pro  | 1.1454    | 1.9004    | 0.60 | -0.73 | 2.82E-02 | down |
| C6orf47   | ENSG0000020443 | protein_coding      | 7.1063    | 4.9897    | 1.42 | 0.51  | 2.82E-02 | up   |
| BMP8B     | ENSG0000011698 | protein_coding      | 1.0224    | 1.5564    | 0.66 | -0.61 | 2.83E-02 | down |
| PTX4      | ENSG0000025169 | protein_coding      | 2.7733    | 1.6268    | 1.70 | 0.77  | 2.83E-02 | up   |

|           |                |                     |          |          |      |       |          |      |
|-----------|----------------|---------------------|----------|----------|------|-------|----------|------|
| HKR1      | ENSG0000018166 | retained_intron;pro | 3.8473   | 2.2299   | 1.73 | 0.79  | 2.85E-02 | up   |
| KDELC2    | ENSG0000017820 | protein_coding;pro  | 7.9363   | 6.0736   | 1.31 | 0.39  | 2.85E-02 | up   |
| PROS1     | ENSG0000018450 | protein_coding;no   | 0.4060   | 0.2073   | 1.96 | 0.97  | 2.85E-02 | up   |
| ZNF512    | ENSG0000024394 | retained_intron;pro | 19.2963  | 15.1738  | 1.27 | 0.35  | 2.85E-02 | up   |
| PLCH1     | ENSG0000011480 | protein_coding;ret  | 0.6291   | 0.9799   | 0.64 | -0.64 | 2.85E-02 | down |
| ZNF558    | ENSG0000016778 | protein_coding;ret  | 1.1124   | 1.6124   | 0.69 | -0.54 | 2.86E-02 | down |
| IFI27L1   | ENSG0000016594 | protein_coding;ret  | 4.3560   | 2.8518   | 1.53 | 0.61  | 2.86E-02 | up   |
| FAM49A    | ENSG0000019787 | protein_coding;ret  | 0.4969   | 0.8718   | 0.57 | -0.81 | 2.87E-02 | down |
| ORMDL1    | ENSG0000012869 | protein_coding;pro  | 11.8231  | 16.8139  | 0.70 | -0.51 | 2.87E-02 | down |
| STK40     | ENSG0000019618 | protein_coding;pro  | 5.0249   | 3.6744   | 1.37 | 0.45  | 2.88E-02 | up   |
| PRPS2     | ENSG0000010191 | protein_coding      | 17.7856  | 12.9570  | 1.37 | 0.46  | 2.88E-02 | up   |
| EVL       | ENSG0000019640 | protein_coding;ret  | 4.8211   | 3.7088   | 1.30 | 0.38  | 2.88E-02 | up   |
| PTTG1     | ENSG0000016461 | protein_coding;ret  | 16.7896  | 21.5487  | 0.78 | -0.36 | 2.90E-02 | down |
| TUSC1     | ENSG0000019868 | protein_coding      | 2.2863   | 1.3562   | 1.69 | 0.75  | 2.90E-02 | up   |
| RPL3      | ENSG0000010031 | protein_coding;pro  | 626.7709 | 789.9211 | 0.79 | -0.33 | 2.91E-02 | down |
| BZW1      | ENSG0000008215 | protein_coding;ret  | 21.8817  | 31.5015  | 0.69 | -0.53 | 2.91E-02 | down |
| SENP1     | ENSG0000007938 | protein_coding;no   | 4.3127   | 6.2350   | 0.69 | -0.53 | 2.92E-02 | down |
| PGAP1     | ENSG0000019712 | retained_intron;pro | 1.7142   | 1.0070   | 1.70 | 0.77  | 2.92E-02 | up   |
| STARD4    | ENSG0000016421 | protein_coding;no   | 5.1354   | 3.7001   | 1.39 | 0.47  | 2.92E-02 | up   |
| IQGAP2    | ENSG0000014570 | protein_coding;no   | 5.5643   | 4.3017   | 1.29 | 0.37  | 2.93E-02 | up   |
| AC011462  | ENSG0000010532 | protein_coding;ret  | 9.5716   | 6.8159   | 1.40 | 0.49  | 2.93E-02 | up   |
| CALM3     | ENSG0000016001 | protein_coding;ret  | 26.6554  | 19.8340  | 1.34 | 0.43  | 2.94E-02 | up   |
| PRR11     | ENSG0000006848 | nonsense_mediate    | 7.0209   | 9.2099   | 0.76 | -0.39 | 2.94E-02 | down |
| GINS2     | ENSG0000013115 | protein_coding      | 10.5726  | 7.7650   | 1.36 | 0.45  | 2.96E-02 | up   |
| INTS3     | ENSG0000014362 | protein_coding;no   | 2.9820   | 3.8413   | 0.78 | -0.37 | 2.96E-02 | down |
| UBA5      | ENSG0000008130 | protein_coding;ret  | 6.0242   | 7.7470   | 0.78 | -0.36 | 2.96E-02 | down |
| FOXRED1   | ENSG0000011007 | nonsense_mediate    | 5.2920   | 3.8913   | 1.36 | 0.44  | 2.97E-02 | up   |
| CLEC11A   | ENSG0000010547 | protein_coding      | 75.6116  | 58.3525  | 1.30 | 0.37  | 2.97E-02 | up   |
| RIC8B     | ENSG0000011178 | protein_coding;ret  | 1.2963   | 0.8263   | 1.57 | 0.65  | 2.98E-02 | up   |
| ZNF418    | ENSG0000019672 | protein_coding;pro  | 1.9563   | 1.0109   | 1.94 | 0.95  | 2.98E-02 | up   |
| PPP5C     | ENSG0000001148 | protein_coding;ret  | 8.0982   | 6.1134   | 1.32 | 0.41  | 2.98E-02 | up   |
| GRB2      | ENSG0000017788 | protein_coding;no   | 16.2961  | 29.4061  | 0.55 | -0.85 | 2.98E-02 | down |
| TMPPE     | ENSG0000018816 | protein_coding      | 1.1450   | 0.6495   | 1.76 | 0.82  | 2.99E-02 | up   |
| TBC1D4    | ENSG0000013611 | protein_coding;pro  | 2.1843   | 1.5001   | 1.46 | 0.54  | 2.99E-02 | up   |
| PLEKHM3   | ENSG0000017838 | protein_coding;pro  | 1.3195   | 0.9204   | 1.43 | 0.52  | 3.00E-02 | up   |
| OSBPL1A   | ENSG0000014144 | nonsense_mediate    | 11.5932  | 14.7244  | 0.79 | -0.34 | 3.01E-02 | down |
| SLC25A28  | ENSG0000015528 | protein_coding;ret  | 15.1343  | 21.1883  | 0.71 | -0.49 | 3.02E-02 | down |
| RPS24     | ENSG0000013832 | protein_coding;ret  | 252.5938 | 358.2738 | 0.71 | -0.50 | 3.02E-02 | down |
| ILK       | ENSG0000016633 | protein_coding;pro  | 17.1757  | 13.4388  | 1.28 | 0.35  | 3.02E-02 | up   |
| FHIT      | ENSG0000018928 | protein_coding;ret  | 0.6728   | 1.0302   | 0.65 | -0.61 | 3.02E-02 | down |
| NICN1     | ENSG0000014502 | protein_coding;pro  | 0.4502   | 0.8781   | 0.51 | -0.96 | 3.02E-02 | down |
| CHMP2A    | ENSG0000013072 | protein_coding;ret  | 29.1864  | 22.8099  | 1.28 | 0.36  | 3.02E-02 | up   |
| RASSF1    | ENSG0000006802 | protein_coding;no   | 12.3203  | 15.9001  | 0.77 | -0.37 | 3.02E-02 | down |
| AL356414  | ENSG0000020530 | lincRNA             | 2.3303   | 4.1699   | 0.56 | -0.84 | 3.03E-02 | down |
| LIAS      | ENSG0000012189 | retained_intron;pro | 1.3737   | 1.9119   | 0.72 | -0.48 | 3.03E-02 | down |
| BMP1      | ENSG0000016848 | protein_coding;no   | 0.8922   | 0.5638   | 1.58 | 0.66  | 3.04E-02 | up   |
| RNASEH1-2 | ENSG0000023417 | antisense           | 5.7055   | 8.4428   | 0.68 | -0.57 | 3.06E-02 | down |
| P4HA1     | ENSG0000012288 | protein_coding;ret  | 27.4383  | 21.7220  | 1.26 | 0.34  | 3.07E-02 | up   |

|          |                |                     |          |           |      |       |          |      |
|----------|----------------|---------------------|----------|-----------|------|-------|----------|------|
| BBS12    | ENSG0000018100 | protein_coding      | 0.7633   | 0.4290    | 1.78 | 0.83  | 3.08E-02 | up   |
| RNF165   | ENSG0000014162 | protein_coding;no   | 0.8058   | 0.5306    | 1.52 | 0.60  | 3.09E-02 | up   |
| AC093591 | ENSG0000024402 | processed_pseudo;   | 82.4649  | 106.6321  | 0.77 | -0.37 | 3.09E-02 | down |
| SLC9A3R1 | ENSG0000010906 | protein_coding;ret  | 11.0431  | 6.0871    | 1.81 | 0.86  | 3.09E-02 | up   |
| SVIL-AS1 | ENSG0000022459 | processed_transcri  | 0.4528   | 0.9703    | 0.47 | -1.10 | 3.09E-02 | down |
| NFYA     | ENSG0000000116 | protein_coding      | 17.0003  | 13.3801   | 1.27 | 0.35  | 3.10E-02 | up   |
| FAM111B  | ENSG0000018905 | protein_coding;ret  | 0.3139   | 0.1541    | 2.04 | 1.03  | 3.10E-02 | up   |
| RAD51AP1 | ENSG0000011124 | protein_coding;ret  | 19.2922  | 14.5019   | 1.33 | 0.41  | 3.11E-02 | up   |
| RPL12    | ENSG0000019795 | protein_coding;prc  | 907.6036 | 1138.9803 | 0.80 | -0.33 | 3.11E-02 | down |
| HDLBP    | ENSG0000011567 | protein_coding;ret  | 18.7910  | 14.8990   | 1.26 | 0.33  | 3.11E-02 | up   |
| NUDT3    | ENSG0000027232 | protein_coding      | 20.0353  | 13.1348   | 1.53 | 0.61  | 3.11E-02 | up   |
| VPS37C   | ENSG0000016798 | protein_coding;ret  | 3.3139   | 4.7131    | 0.70 | -0.51 | 3.13E-02 | down |
| MELTF    | ENSG0000016397 | retained_intron;prc | 0.1792   | 0.0942    | 1.90 | 0.93  | 3.13E-02 | up   |
| LGALS1   | ENSG0000010009 | protein_coding;ret  | 72.6981  | 57.3017   | 1.27 | 0.34  | 3.13E-02 | up   |
| KLHL22   | ENSG0000009991 | protein_coding;prc  | 1.4920   | 0.9501    | 1.57 | 0.65  | 3.14E-02 | up   |
| UBE3C    | ENSG0000000933 | retained_intron;prc | 7.5994   | 9.5177    | 0.80 | -0.32 | 3.14E-02 | down |
| PDXDC1   | ENSG0000017988 | protein_coding;ret  | 11.1713  | 8.9307    | 1.25 | 0.32  | 3.14E-02 | up   |
| RPP21    | ENSG0000024137 | processed_transcri  | 11.1814  | 7.9307    | 1.41 | 0.50  | 3.15E-02 | up   |
| NT5DC2   | ENSG0000016826 | protein_coding;ret  | 5.4383   | 3.8768    | 1.40 | 0.49  | 3.15E-02 | up   |
| GON7     | ENSG0000017027 | protein_coding      | 14.3175  | 19.9675   | 0.72 | -0.48 | 3.15E-02 | down |
| SPINT2   | ENSG0000016764 | retained_intron;prc | 0.2180   | 0.0660    | 3.30 | 1.72  | 3.15E-02 | up   |
| PCGF3    | ENSG0000018561 | protein_coding;no   | 5.5841   | 4.2050    | 1.33 | 0.41  | 3.15E-02 | up   |
| CLASP2   | ENSG0000016353 | protein_coding;ret  | 4.2658   | 5.3857    | 0.79 | -0.34 | 3.15E-02 | down |
| TRPV1    | ENSG0000019668 | nonsense_mediate    | 0.3757   | 0.1930    | 1.95 | 0.96  | 3.16E-02 | up   |
| CPNE2    | ENSG0000014084 | retained_intron;prc | 6.2838   | 4.7833    | 1.31 | 0.39  | 3.16E-02 | up   |
| SPECC1   | ENSG0000012848 | protein_coding;prc  | 0.6188   | 0.3911    | 1.58 | 0.66  | 3.16E-02 | up   |
| GBA      | ENSG0000017762 | processed_transcri  | 13.2645  | 10.1729   | 1.30 | 0.38  | 3.17E-02 | up   |
| SLC2A3   | ENSG0000005980 | retained_intron;prc | 9.1058   | 7.0661    | 1.29 | 0.37  | 3.17E-02 | up   |
| TMED6    | ENSG0000015731 | protein_coding;ret  | 0.3011   | 0.6357    | 0.47 | -1.08 | 3.17E-02 | down |
| SOBP     | ENSG0000011232 | protein_coding;prc  | 0.1495   | 0.2698    | 0.55 | -0.85 | 3.17E-02 | down |
| ZC3H12D  | ENSG0000017819 | protein_coding;prc  | 0.4790   | 0.7614    | 0.63 | -0.67 | 3.18E-02 | down |
| CD84     | ENSG0000006629 | protein_coding;ret  | 5.7723   | 4.5224    | 1.28 | 0.35  | 3.18E-02 | up   |
| AC133552 | ENSG0000026258 | processed_transcri  | 0.9122   | 0.4506    | 2.02 | 1.02  | 3.18E-02 | up   |
| CD38     | ENSG0000000446 | protein_coding;ret  | 5.3048   | 6.8496    | 0.77 | -0.37 | 3.18E-02 | down |
| MRFAP1   | ENSG0000017901 | protein_coding;ret  | 38.2807  | 67.2557   | 0.57 | -0.81 | 3.19E-02 | down |
| COPS6    | ENSG0000016809 | nonsense_mediate    | 23.1410  | 18.0079   | 1.29 | 0.36  | 3.20E-02 | up   |
| USP31    | ENSG0000010340 | protein_coding      | 0.9768   | 0.5085    | 1.92 | 0.94  | 3.20E-02 | up   |
| IFIT2    | ENSG0000011992 | protein_coding      | 0.1884   | 0.0829    | 2.27 | 1.18  | 3.20E-02 | up   |
| USP45    | ENSG0000012355 | protein_coding;ret  | 1.7596   | 2.6020    | 0.68 | -0.56 | 3.21E-02 | down |
| POLR2M   | ENSG0000025552 | protein_coding;no   | 4.0955   | 5.5093    | 0.74 | -0.43 | 3.22E-02 | down |
| ATP2A2   | ENSG0000017443 | protein_coding;ret  | 5.4595   | 7.3449    | 0.74 | -0.43 | 3.25E-02 | down |
| EIF3L    | ENSG0000010012 | protein_coding;no   | 143.1234 | 179.4755  | 0.80 | -0.33 | 3.25E-02 | down |
| ITGA5    | ENSG0000016163 | retained_intron;prc | 6.4159   | 8.2226    | 0.78 | -0.36 | 3.27E-02 | down |
| RASGRP4  | ENSG0000017177 | retained_intron;prc | 0.6391   | 0.3511    | 1.82 | 0.86  | 3.27E-02 | up   |
| FHL1     | ENSG0000002226 | protein_coding;prc  | 0.3183   | 0.1702    | 1.87 | 0.90  | 3.28E-02 | up   |
| VDR      | ENSG0000011142 | protein_coding;no   | 1.5749   | 2.5929    | 0.61 | -0.72 | 3.28E-02 | down |
| IRF5     | ENSG0000012860 | retained_intron;prc | 1.3559   | 2.0737    | 0.65 | -0.61 | 3.28E-02 | down |
| VPS13D   | ENSG0000004870 | protein_coding;no   | 1.7346   | 1.3155    | 1.32 | 0.40  | 3.28E-02 | up   |



|           |                |                     |         |          |      |       |          |      |
|-----------|----------------|---------------------|---------|----------|------|-------|----------|------|
| HPS4      | ENSG0000010009 | nonsense_mediate    | 4.1688  | 5.2594   | 0.79 | -0.34 | 3.29E-02 | down |
| SNX3      | ENSG0000011233 | nonsense_mediate    | 80.1888 | 103.3088 | 0.78 | -0.37 | 3.29E-02 | down |
| LINC00205 | ENSG0000022376 | bidirectional_pron  | 0.5262  | 0.1632   | 3.22 | 1.69  | 3.29E-02 | up   |
| SNX10     | ENSG0000008630 | protein_coding;pro  | 8.2609  | 13.4392  | 0.61 | -0.70 | 3.29E-02 | down |
| CHD7      | ENSG0000017131 | protein_coding;ret  | 2.4088  | 1.8134   | 1.33 | 0.41  | 3.30E-02 | up   |
| RN7SK     | ENSG0000028329 | snRNA               | 8.3301  | 4.6929   | 1.78 | 0.83  | 3.30E-02 | up   |
| FAM204A   | ENSG0000016566 | processed_transcri  | 2.9127  | 3.6782   | 0.79 | -0.34 | 3.30E-02 | down |
| SETD6     | ENSG0000010303 | protein_coding;ret  | 6.3981  | 3.7140   | 1.72 | 0.78  | 3.31E-02 | up   |
| OPA1      | ENSG0000019883 | protein_coding;no   | 9.3449  | 11.7716  | 0.79 | -0.33 | 3.31E-02 | down |
| RAB1B     | ENSG0000017490 | protein_coding      | 61.9774 | 49.1354  | 1.26 | 0.33  | 3.31E-02 | up   |
| ACVR2A    | ENSG0000012198 | protein_coding;pro  | 0.2780  | 0.1475   | 1.89 | 0.91  | 3.32E-02 | up   |
| JOSD2     | ENSG0000016167 | protein_coding;ret  | 2.7168  | 1.6254   | 1.67 | 0.74  | 3.32E-02 | up   |
| PLTP      | ENSG0000010097 | protein_coding      | 3.7180  | 5.3317   | 0.70 | -0.52 | 3.32E-02 | down |
| MOGS      | ENSG0000011527 | retained_intron;no  | 4.2385  | 6.3913   | 0.66 | -0.59 | 3.32E-02 | down |
| AC009302  | ENSG0000023386 | processed_pseudo;   | 15.7493 | 10.1027  | 1.56 | 0.64  | 3.33E-02 | up   |
| ZNF22     | ENSG0000016551 | protein_coding      | 28.4092 | 35.9772  | 0.79 | -0.34 | 3.33E-02 | down |
| COPRS     | ENSG0000017230 | protein_coding;no   | 16.6352 | 11.8959  | 1.40 | 0.48  | 3.33E-02 | up   |
| STBD1     | ENSG0000011880 | protein_coding      | 6.5812  | 4.7720   | 1.38 | 0.46  | 3.34E-02 | up   |
| PHF14     | ENSG0000010644 | retained_intron;pro | 2.6338  | 3.3776   | 0.78 | -0.36 | 3.35E-02 | down |
| NXF1      | ENSG0000016223 | retained_intron;pro | 12.0601 | 9.4703   | 1.27 | 0.35  | 3.35E-02 | up   |
| MAP1S     | ENSG0000013047 | protein_coding;no   | 1.7648  | 1.1108   | 1.59 | 0.67  | 3.35E-02 | up   |
| AP000781  | ENSG0000025497 | protein_coding;ret  | 13.1407 | 1.4744   | 8.91 | 3.16  | 3.36E-02 | up   |
| ACLY      | ENSG0000013147 | protein_coding;pro  | 26.5445 | 20.8049  | 1.28 | 0.35  | 3.36E-02 | up   |
| SMG1P5    | ENSG0000018360 | processed_transcri  | 2.4429  | 3.5320   | 0.69 | -0.53 | 3.36E-02 | down |
| FGD5-AS1  | ENSG0000022573 | antisense           | 24.2038 | 19.2709  | 1.26 | 0.33  | 3.36E-02 | up   |
| PTPRS     | ENSG0000010542 | protein_coding;ret  | 0.1322  | 0.2405   | 0.55 | -0.86 | 3.37E-02 | down |
| GLUD1P3   | ENSG0000025095 | processed_transcri  | 1.1605  | 0.5354   | 2.17 | 1.12  | 3.38E-02 | up   |
| BMP2K     | ENSG0000013875 | protein_coding;no   | 7.1356  | 5.5754   | 1.28 | 0.36  | 3.39E-02 | up   |
| AL138759  | ENSG0000024433 | sense_overlapping   | 4.9798  | 2.9588   | 1.68 | 0.75  | 3.39E-02 | up   |
| ARPC1A    | ENSG0000024168 | protein_coding;pro  | 16.6723 | 12.5780  | 1.33 | 0.41  | 3.39E-02 | up   |
| SLC40A1   | ENSG0000013844 | protein_coding;ret  | 1.7278  | 1.1350   | 1.52 | 0.61  | 3.41E-02 | up   |
| KCNE1     | ENSG0000018050 | processed_transcri  | 0.4464  | 0.2498   | 1.79 | 0.84  | 3.41E-02 | up   |
| C1orf162  | ENSG0000014311 | protein_coding;pro  | 48.4732 | 38.7408  | 1.25 | 0.32  | 3.41E-02 | up   |
| ADM       | ENSG0000014892 | protein_coding      | 1.8811  | 1.1658   | 1.61 | 0.69  | 3.41E-02 | up   |
| MIR497HG  | ENSG0000026753 | antisense           | 0.4672  | 0.1711   | 2.73 | 1.45  | 3.42E-02 | up   |
| RASA3     | ENSG0000018598 | protein_coding;pro  | 7.6419  | 9.8344   | 0.78 | -0.36 | 3.42E-02 | down |
| SLC25A3   | ENSG0000007541 | protein_coding;no   | 30.6887 | 38.6947  | 0.79 | -0.33 | 3.42E-02 | down |
| RBMXL1    | ENSG0000021351 | protein_coding      | 8.4653  | 6.5362   | 1.30 | 0.37  | 3.42E-02 | up   |
| IGF2R     | ENSG0000019708 | protein_coding;ret  | 5.4674  | 4.3478   | 1.26 | 0.33  | 3.42E-02 | up   |
| LMNB2     | ENSG0000017661 | processed_transcri  | 11.1338 | 14.1125  | 0.79 | -0.34 | 3.43E-02 | down |
| NMT2      | ENSG0000015246 | protein_coding;pro  | 0.0682  | 0.1455   | 0.47 | -1.09 | 3.44E-02 | down |
| INSIG1    | ENSG0000018648 | protein_coding;ret  | 12.8793 | 17.3172  | 0.74 | -0.43 | 3.44E-02 | down |
| NMNAT3    | ENSG0000016386 | nonsense_mediate    | 0.2880  | 0.4438   | 0.65 | -0.62 | 3.44E-02 | down |
| MGST1     | ENSG0000000839 | protein_coding;TE   | 15.8660 | 19.7095  | 0.80 | -0.31 | 3.45E-02 | down |
| MON1B     | ENSG0000010311 | protein_coding;ret  | 4.6030  | 6.0127   | 0.77 | -0.39 | 3.46E-02 | down |
| ATF3      | ENSG0000016277 | protein_coding;ret  | 1.0067  | 1.5546   | 0.65 | -0.63 | 3.47E-02 | down |
| PCDHGA10  | ENSG0000025384 | protein_coding      | 0.0696  | 0.1460   | 0.48 | -1.07 | 3.47E-02 | down |
| CPLANE2   | ENSG0000013288 | protein_coding      | 0.6343  | 0.3214   | 1.97 | 0.98  | 3.47E-02 | up   |

|           |                |                     |           |           |      |       |          |      |
|-----------|----------------|---------------------|-----------|-----------|------|-------|----------|------|
| FYTTD1    | ENSG0000012206 | protein_coding;no   | 6.7108    | 4.4168    | 1.52 | 0.60  | 3.49E-02 | up   |
| AKT3      | ENSG0000011702 | protein_coding;pro  | 0.5732    | 0.8619    | 0.67 | -0.59 | 3.50E-02 | down |
| RAB3IP    | ENSG0000012732 | protein_coding;ret  | 0.8910    | 0.5999    | 1.49 | 0.57  | 3.50E-02 | up   |
| RTEL1-TNF | ENSG0000002603 | retained_intron;no  | 0.6193    | 0.3293    | 1.88 | 0.91  | 3.50E-02 | up   |
| LPAR2     | ENSG0000006454 | retained_intron;pro | 3.8099    | 2.5222    | 1.51 | 0.60  | 3.50E-02 | up   |
| PIGG      | ENSG0000017422 | protein_coding;no   | 3.2101    | 2.4386    | 1.32 | 0.40  | 3.52E-02 | up   |
| DPH6      | ENSG0000013414 | protein_coding;pro  | 0.7404    | 1.0794    | 0.69 | -0.54 | 3.53E-02 | down |
| BROX      | ENSG0000016281 | protein_coding;pro  | 7.5165    | 9.5947    | 0.78 | -0.35 | 3.53E-02 | down |
| AGPAT5    | ENSG0000015518 | protein_coding;pro  | 16.7968   | 24.4196   | 0.69 | -0.54 | 3.53E-02 | down |
| AC020915  | ENSG0000026851 | antisense           | 1.3541    | 0.7683    | 1.76 | 0.82  | 3.53E-02 | up   |
| TMEM30A   | ENSG0000011269 | protein_coding      | 39.7387   | 31.0763   | 1.28 | 0.35  | 3.54E-02 | up   |
| PITPNC1   | ENSG0000015421 | protein_coding;ret  | 2.8579    | 3.8648    | 0.74 | -0.44 | 3.54E-02 | down |
| PAM       | ENSG0000014573 | protein_coding;no   | 2.2042    | 1.5815    | 1.39 | 0.48  | 3.54E-02 | up   |
| HIST1H2BE | ENSG0000015837 | protein_coding      | 2.2503    | 1.2212    | 1.84 | 0.88  | 3.55E-02 | up   |
| MAGI3     | ENSG0000008102 | protein_coding;pro  | 0.2129    | 0.1158    | 1.84 | 0.88  | 3.56E-02 | up   |
| NAA20     | ENSG0000017341 | processed_transcri  | 18.7423   | 23.5966   | 0.79 | -0.33 | 3.57E-02 | down |
| RPS20     | ENSG0000000898 | protein_coding;ret  | 217.4617  | 271.8058  | 0.80 | -0.32 | 3.58E-02 | down |
| EMILIN2   | ENSG0000013220 | protein_coding;ret  | 6.1764    | 4.7904    | 1.29 | 0.37  | 3.58E-02 | up   |
| GFOD2     | ENSG0000014109 | retained_intron;pro | 1.9135    | 1.3550    | 1.41 | 0.50  | 3.59E-02 | up   |
| AL049634  | ENSG0000026086 | protein_coding      | 1.2376    | 0.6230    | 1.99 | 0.99  | 3.59E-02 | up   |
| CYB5B     | ENSG0000010301 | retained_intron;pro | 12.3838   | 16.6822   | 0.74 | -0.43 | 3.60E-02 | down |
| WBP1L     | ENSG0000016627 | protein_coding;pro  | 6.1973    | 4.8058    | 1.29 | 0.37  | 3.61E-02 | up   |
| ZNF528-AS | ENSG0000026983 | lincRNA;retained_   | 1.8920    | 1.1736    | 1.61 | 0.69  | 3.61E-02 | up   |
| RPS7P11   | ENSG0000021332 | processed_pseudo;   | 102.1535  | 127.6178  | 0.80 | -0.32 | 3.62E-02 | down |
| FCAR      | ENSG0000018643 | protein_coding;pro  | 15.2372   | 11.8452   | 1.29 | 0.36  | 3.62E-02 | up   |
| LIN7C     | ENSG0000014894 | protein_coding      | 4.5868    | 6.4891    | 0.71 | -0.50 | 3.63E-02 | down |
| SLC50A1   | ENSG0000016924 | nonsense_mediate    | 13.0456   | 9.5258    | 1.37 | 0.45  | 3.64E-02 | up   |
| RNASEK-C  | ENSG0000016193 | retained_intron;pro | 10.9944   | 7.2610    | 1.51 | 0.60  | 3.65E-02 | up   |
| ZDHHC7    | ENSG0000015378 | protein_coding;no   | 14.2432   | 11.1761   | 1.27 | 0.35  | 3.65E-02 | up   |
| PGD       | ENSG0000014265 | protein_coding;no   | 119.0223  | 95.2759   | 1.25 | 0.32  | 3.65E-02 | up   |
| ANKLE1    | ENSG0000016011 | nonsense_mediate    | 4.9903    | 3.2566    | 1.53 | 0.62  | 3.66E-02 | up   |
| SPDL1     | ENSG0000004027 | protein_coding;pro  | 4.6272    | 6.1808    | 0.75 | -0.42 | 3.66E-02 | down |
| ANKRD18E  | ENSG0000022643 | processed_transcri  | 0.2061    | 0.4217    | 0.49 | -1.03 | 3.66E-02 | down |
| AL671277  | ENSG0000023766 | unprocessed_pseu    | 1.7020    | 0.6033    | 2.82 | 1.50  | 3.66E-02 | up   |
| RPS3AP25  | ENSG0000023238 | processed_pseudo;   | 2.3210    | 3.8165    | 0.61 | -0.72 | 3.66E-02 | down |
| ABCA5     | ENSG0000015426 | nonsense_mediate    | 0.8664    | 0.5877    | 1.47 | 0.56  | 3.67E-02 | up   |
| CTH       | ENSG0000011676 | protein_coding;pro  | 1.8876    | 2.8516    | 0.66 | -0.60 | 3.67E-02 | down |
| ARMC1     | ENSG0000010444 | protein_coding;no   | 16.2849   | 11.5124   | 1.41 | 0.50  | 3.68E-02 | up   |
| RCC2      | ENSG0000017905 | protein_coding;pro  | 27.9750   | 35.3107   | 0.79 | -0.34 | 3.69E-02 | down |
| CHPF      | ENSG0000012398 | protein_coding      | 0.1973    | 0.3708    | 0.53 | -0.91 | 3.69E-02 | down |
| EEF1A1    | ENSG0000015650 | protein_coding;ret  | 3152.1325 | 3902.6746 | 0.81 | -0.31 | 3.70E-02 | down |
| DUSP5P1   | ENSG0000018392 | processed_pseudo;   | 1.6568    | 0.9018    | 1.84 | 0.88  | 3.70E-02 | up   |
| ATP5ME    | ENSG0000016902 | retained_intron;pro | 107.4871  | 85.6145   | 1.26 | 0.33  | 3.70E-02 | up   |
| THOC7     | ENSG0000016363 | protein_coding;ret  | 33.2901   | 41.5678   | 0.80 | -0.32 | 3.71E-02 | down |
| GPR34     | ENSG0000017165 | protein_coding      | 1.3677    | 0.7974    | 1.72 | 0.78  | 3.72E-02 | up   |
| CMTR2     | ENSG0000018091 | protein_coding;ret  | 4.8158    | 6.1570    | 0.78 | -0.35 | 3.72E-02 | down |
| AP001324  | ENSG0000022761 | processed_pseudo;   | 120.3472  | 151.8570  | 0.79 | -0.34 | 3.72E-02 | down |
| OCRL      | ENSG0000012212 | protein_coding;no   | 2.9603    | 4.0376    | 0.73 | -0.45 | 3.72E-02 | down |

|          |                |                     |         |         |      |       |          |      |
|----------|----------------|---------------------|---------|---------|------|-------|----------|------|
| LYL1     | ENSG0000010490 | protein_coding;ret  | 21.7485 | 27.3865 | 0.79 | -0.33 | 3.73E-02 | down |
| RFC5     | ENSG0000011144 | protein_coding;pro  | 20.0455 | 15.7874 | 1.27 | 0.34  | 3.73E-02 | up   |
| SH2B3    | ENSG0000011125 | protein_coding      | 3.7688  | 5.0444  | 0.75 | -0.42 | 3.73E-02 | down |
| AC026401 | ENSG0000028020 | lincRNA             | 4.3396  | 6.6866  | 0.65 | -0.62 | 3.73E-02 | down |
| TAF6     | ENSG0000010629 | protein_coding;ret  | 5.9486  | 4.2821  | 1.39 | 0.47  | 3.74E-02 | up   |
| CHAF1B   | ENSG0000015925 | protein_coding;pro  | 6.2547  | 4.6706  | 1.34 | 0.42  | 3.74E-02 | up   |
| CWC22    | ENSG0000016351 | protein_coding      | 13.4963 | 17.0219 | 0.79 | -0.33 | 3.74E-02 | down |
| PPFIBP2  | ENSG0000016638 | protein_coding;ret  | 0.3950  | 0.5985  | 0.66 | -0.60 | 3.74E-02 | down |
| FGR      | ENSG0000000093 | protein_coding;pro  | 24.6128 | 19.5344 | 1.26 | 0.33  | 3.74E-02 | up   |
| KMT2D    | ENSG0000016754 | protein_coding;pro  | 1.8655  | 1.3801  | 1.35 | 0.43  | 3.75E-02 | up   |
| MZT2A    | ENSG0000017327 | protein_coding;ret  | 11.6168 | 8.9166  | 1.30 | 0.38  | 3.76E-02 | up   |
| PDPR     | ENSG0000009085 | retained_intron;pro | 8.8350  | 5.6148  | 1.57 | 0.65  | 3.76E-02 | up   |
| TREM1    | ENSG0000012473 | protein_coding;ret  | 1.6038  | 1.0433  | 1.54 | 0.62  | 3.76E-02 | up   |
| EGR3     | ENSG0000017938 | protein_coding;pro  | 0.3191  | 0.1716  | 1.86 | 0.89  | 3.77E-02 | up   |
| NDUFV2   | ENSG0000017812 | processed_transcri  | 48.9763 | 60.6743 | 0.81 | -0.31 | 3.77E-02 | down |
| SLC7A5   | ENSG0000010325 | protein_coding;ret  | 10.8303 | 13.8723 | 0.78 | -0.36 | 3.78E-02 | down |
| GPR82    | ENSG0000017165 | protein_coding;pro  | 1.2602  | 0.7656  | 1.65 | 0.72  | 3.78E-02 | up   |
| NCSTN    | ENSG0000016273 | nonsense_mediate    | 25.6812 | 20.4767 | 1.25 | 0.33  | 3.78E-02 | up   |
| RSRC2    | ENSG0000011101 | nonsense_mediate    | 4.5595  | 6.1643  | 0.74 | -0.44 | 3.78E-02 | down |
| AL162458 | ENSG0000028579 | antisense           | 0.0896  | 0.0426  | 2.10 | 1.07  | 3.79E-02 | up   |
| IKZF5    | ENSG0000009557 | protein_coding;pro  | 5.5670  | 7.5775  | 0.73 | -0.44 | 3.80E-02 | down |
| PCF11    | ENSG0000016549 | protein_coding;TE   | 8.6604  | 10.7250 | 0.81 | -0.31 | 3.81E-02 | down |
| ADAMTS1  | ENSG0000014230 | protein_coding;ret  | 0.4175  | 0.2371  | 1.76 | 0.82  | 3.83E-02 | up   |
| EPDR1    | ENSG0000008628 | protein_coding      | 4.4276  | 2.2109  | 2.00 | 1.00  | 3.83E-02 | up   |
| AL049697 | ENSG0000021320 | processed_transcri  | 0.4826  | 0.2006  | 2.41 | 1.27  | 3.84E-02 | up   |
| PRSS57   | ENSG0000018519 | protein_coding      | 1.7669  | 0.9720  | 1.82 | 0.86  | 3.85E-02 | up   |
| MERTK    | ENSG0000015320 | protein_coding;ret  | 1.3715  | 2.0217  | 0.68 | -0.56 | 3.85E-02 | down |
| NOC3L    | ENSG0000017314 | processed_transcri  | 7.5403  | 9.6816  | 0.78 | -0.36 | 3.85E-02 | down |
| AL441992 | ENSG0000022347 | antisense           | 3.2745  | 1.7210  | 1.90 | 0.93  | 3.85E-02 | up   |
| PSMC4    | ENSG0000001327 | protein_coding;ret  | 30.5883 | 24.2781 | 1.26 | 0.33  | 3.85E-02 | up   |
| UBASH3B  | ENSG0000015412 | protein_coding;ret  | 1.7845  | 2.4446  | 0.73 | -0.45 | 3.86E-02 | down |
| PIBF1    | ENSG0000008353 | protein_coding;pro  | 4.2889  | 5.8240  | 0.74 | -0.44 | 3.86E-02 | down |
| AL391832 | ENSG0000025808 | lincRNA             | 3.0512  | 1.7470  | 1.75 | 0.80  | 3.86E-02 | up   |
| SLC38A9  | ENSG0000017705 | protein_coding;ret  | 1.2940  | 1.7992  | 0.72 | -0.48 | 3.87E-02 | down |
| MIS18BP1 | ENSG0000012953 | nonsense_mediate    | 26.3108 | 32.6189 | 0.81 | -0.31 | 3.87E-02 | down |
| PROK2    | ENSG0000016342 | protein_coding      | 16.7157 | 21.8789 | 0.76 | -0.39 | 3.88E-02 | down |
| RRN3P1   | ENSG0000024812 | processed_transcri  | 1.8908  | 2.6535  | 0.71 | -0.49 | 3.88E-02 | down |
| TSPAN14  | ENSG0000010821 | processed_transcri  | 3.1361  | 4.2014  | 0.75 | -0.42 | 3.88E-02 | down |
| WDR17    | ENSG0000015062 | protein_coding;pro  | 0.2149  | 0.0970  | 2.22 | 1.15  | 3.89E-02 | up   |
| TEX15    | ENSG0000013386 | protein_coding;pro  | 4.6640  | 3.6105  | 1.29 | 0.37  | 3.90E-02 | up   |
| BCL2     | ENSG0000017179 | protein_coding;pro  | 3.9681  | 5.2955  | 0.75 | -0.42 | 3.90E-02 | down |
| LPL      | ENSG0000017544 | protein_coding;pro  | 28.3320 | 35.0724 | 0.81 | -0.31 | 3.91E-02 | down |
| GPX4     | ENSG0000016746 | protein_coding;ret  | 40.3717 | 31.5757 | 1.28 | 0.35  | 3.91E-02 | up   |
| GPSM3    | ENSG0000021365 | nonsense_mediate    | 35.8716 | 22.9302 | 1.56 | 0.65  | 3.92E-02 | up   |
| PPP1R10  | ENSG0000020456 | protein_coding;pro  | 2.5917  | 3.6002  | 0.72 | -0.47 | 3.93E-02 | down |
| OSBPL3   | ENSG0000007088 | protein_coding;no   | 1.4727  | 1.0215  | 1.44 | 0.53  | 3.93E-02 | up   |
| NAA38    | ENSG0000018301 | protein_coding;pro  | 7.3933  | 5.1809  | 1.43 | 0.51  | 3.94E-02 | up   |
| AP006222 | ENSG0000022846 | processed_transcri  | 0.3899  | 0.1960  | 1.99 | 0.99  | 3.95E-02 | up   |

|           |                |                     |          |          |      |       |          |      |
|-----------|----------------|---------------------|----------|----------|------|-------|----------|------|
| BZW1P2    | ENSG0000019840 | processed_pseudo;   | 1.0050   | 1.8149   | 0.55 | -0.85 | 3.95E-02 | down |
| WDTC1     | ENSG0000014278 | protein_coding;no   | 8.4530   | 6.5529   | 1.29 | 0.37  | 3.96E-02 | up   |
| TMEM63A   | ENSG0000019618 | protein_coding;pro  | 1.8258   | 1.3074   | 1.40 | 0.48  | 3.96E-02 | up   |
| CBFA2T3   | ENSG0000012999 | retained_intron;pro | 1.0339   | 0.6817   | 1.52 | 0.60  | 3.99E-02 | up   |
| FOXN3     | ENSG0000005325 | protein_coding;pro  | 3.3418   | 4.2564   | 0.79 | -0.35 | 4.00E-02 | down |
| AC005332  | ENSG0000027747 | lincRNA             | 0.3676   | 0.1916   | 1.92 | 0.94  | 4.00E-02 | up   |
| ELP4      | ENSG0000010991 | protein_coding;no   | 0.5443   | 0.7489   | 0.73 | -0.46 | 4.03E-02 | down |
| HMG3      | ENSG0000011841 | protein_coding      | 82.0192  | 65.6213  | 1.25 | 0.32  | 4.04E-02 | up   |
| SIDT1     | ENSG0000007285 | protein_coding;ret  | 0.0617   | 0.1523   | 0.41 | -1.30 | 4.04E-02 | down |
| KCTD12    | ENSG0000017869 | protein_coding      | 3.1028   | 2.2083   | 1.41 | 0.49  | 4.04E-02 | up   |
| ZNF548    | ENSG0000018878 | protein_coding;no   | 1.1528   | 0.7237   | 1.59 | 0.67  | 4.05E-02 | up   |
| CSTA      | ENSG0000012155 | protein_coding      | 116.2882 | 144.6606 | 0.80 | -0.31 | 4.05E-02 | down |
| TBC1D10A  | ENSG0000009999 | protein_coding;no   | 0.2646   | 0.1394   | 1.90 | 0.92  | 4.05E-02 | up   |
| PLA2G12A  | ENSG0000012373 | protein_coding;pro  | 3.4664   | 2.4577   | 1.41 | 0.50  | 4.06E-02 | up   |
| GNPNAT1   | ENSG0000010052 | protein_coding;ret  | 14.1372  | 11.2184  | 1.26 | 0.33  | 4.06E-02 | up   |
| LRRC39    | ENSG0000012247 | protein_coding      | 0.5959   | 1.0740   | 0.55 | -0.85 | 4.08E-02 | down |
| U2SURP    | ENSG0000016371 | retained_intron;pro | 13.4276  | 16.7046  | 0.80 | -0.32 | 4.08E-02 | down |
| AGAP4     | ENSG0000018823 | processed_transcri  | 0.9774   | 2.0482   | 0.48 | -1.07 | 4.08E-02 | down |
| NFAT5     | ENSG0000010290 | nonsense_mediate    | 0.9351   | 1.5616   | 0.60 | -0.74 | 4.08E-02 | down |
| SLC25A39  | ENSG0000001330 | retained_intron;pro | 16.3427  | 12.1617  | 1.34 | 0.43  | 4.09E-02 | up   |
| ING3      | ENSG0000007124 | protein_coding;no   | 3.5919   | 4.8675   | 0.74 | -0.44 | 4.09E-02 | down |
| GAS6-AS1  | ENSG0000023369 | antisense           | 0.3553   | 0.5720   | 0.62 | -0.69 | 4.09E-02 | down |
| IZUMO4    | ENSG0000009984 | retained_intron;pro | 0.2807   | 0.1386   | 2.02 | 1.02  | 4.09E-02 | up   |
| AC005261  | ENSG0000026820 | lincRNA             | 3.3426   | 4.6686   | 0.72 | -0.48 | 4.09E-02 | down |
| AC073957  | ENSG0000027315 | antisense           | 0.5562   | 0.3138   | 1.77 | 0.83  | 4.10E-02 | up   |
| ECE1      | ENSG0000011729 | protein_coding;ret  | 0.4679   | 0.2872   | 1.63 | 0.70  | 4.11E-02 | up   |
| SLC7A7    | ENSG0000015546 | protein_coding;ret  | 0.9071   | 1.3978   | 0.65 | -0.62 | 4.11E-02 | down |
| RN7SL4P   | ENSG0000026374 | misc_RNA            | 9.8063   | 4.0031   | 2.45 | 1.29  | 4.11E-02 | up   |
| TEX10     | ENSG0000013689 | protein_coding;pro  | 7.5809   | 9.4884   | 0.80 | -0.32 | 4.12E-02 | down |
| C15orf39  | ENSG0000016717 | protein_coding      | 2.1649   | 3.1528   | 0.69 | -0.54 | 4.12E-02 | down |
| USP16     | ENSG0000015625 | protein_coding;ret  | 11.3418  | 14.0519  | 0.81 | -0.31 | 4.12E-02 | down |
| ZBTB40    | ENSG0000018467 | protein_coding      | 4.9251   | 3.8295   | 1.29 | 0.36  | 4.12E-02 | up   |
| SEPSECS-A | ENSG0000028150 | antisense           | 1.9378   | 1.2133   | 1.60 | 0.68  | 4.12E-02 | up   |
| AC126323  | ENSG0000016610 | transcribed_unpro   | 0.4776   | 0.7856   | 0.61 | -0.72 | 4.13E-02 | down |
| GGPS1     | ENSG0000015290 | protein_coding;pro  | 4.2794   | 6.0027   | 0.71 | -0.49 | 4.13E-02 | down |
| TYMS      | ENSG0000017689 | protein_coding;ret  | 113.8608 | 91.5580  | 1.24 | 0.31  | 4.14E-02 | up   |
| HSD17B6   | ENSG0000002542 | protein_coding;pro  | 0.4677   | 0.2462   | 1.90 | 0.93  | 4.14E-02 | up   |
| NDUFA11   | ENSG0000017488 | protein_coding;ret  | 19.5722  | 15.5375  | 1.26 | 0.33  | 4.15E-02 | up   |
| HES1      | ENSG0000011431 | protein_coding;ret  | 0.5870   | 0.1946   | 3.02 | 1.59  | 4.15E-02 | up   |
| ENO1P4    | ENSG0000024179 | processed_pseudo;   | 1.2396   | 0.5256   | 2.36 | 1.24  | 4.16E-02 | up   |
| FKBPL     | ENSG0000020431 | protein_coding      | 4.1824   | 2.6479   | 1.58 | 0.66  | 4.16E-02 | up   |
| ZNF7      | ENSG0000014778 | protein_coding;ret  | 2.5799   | 1.2996   | 1.99 | 0.99  | 4.16E-02 | up   |
| SPATC1L   | ENSG0000016028 | protein_coding      | 3.9934   | 2.6997   | 1.48 | 0.56  | 4.17E-02 | up   |
| CDK2      | ENSG0000012337 | processed_transcri  | 14.4769  | 11.4095  | 1.27 | 0.34  | 4.17E-02 | up   |
| BTBD6P1   | ENSG0000022910 | processed_pseudo;   | 0.8076   | 0.4034   | 2.00 | 1.00  | 4.17E-02 | up   |
| CHD2      | ENSG0000017357 | protein_coding;no   | 3.5512   | 4.8209   | 0.74 | -0.44 | 4.19E-02 | down |
| STAT2     | ENSG0000017058 | retained_intron;pro | 6.4578   | 4.9491   | 1.30 | 0.38  | 4.19E-02 | up   |
| APOM      | ENSG0000020444 | protein_coding      | 0.7276   | 1.3571   | 0.54 | -0.90 | 4.21E-02 | down |

|            |                |                      |          |          |      |       |          |      |
|------------|----------------|----------------------|----------|----------|------|-------|----------|------|
| MINDY1     | ENSG0000014340 | protein_coding;proc  | 2.0512   | 1.3660   | 1.50 | 0.59  | 4.21E-02 | up   |
| TONSL      | ENSG0000016094 | protein_coding;ret   | 4.3961   | 3.2316   | 1.36 | 0.44  | 4.22E-02 | up   |
| COG2       | ENSG0000013577 | protein_coding;ret   | 3.5334   | 4.4720   | 0.79 | -0.34 | 4.22E-02 | down |
| H2AFVP1    | ENSG0000025874 | transcribed_proces   | 4.2659   | 2.6078   | 1.64 | 0.71  | 4.23E-02 | up   |
| UBAP2L     | ENSG0000014356 | protein_coding;proc  | 18.0132  | 14.4456  | 1.25 | 0.32  | 4.23E-02 | up   |
| H3F3B      | ENSG0000013247 | retained_intron;proc | 41.9616  | 56.4308  | 0.74 | -0.43 | 4.23E-02 | down |
| HDAC6      | ENSG0000009463 | protein_coding;no    | 4.1847   | 3.2558   | 1.29 | 0.36  | 4.24E-02 | up   |
| NQO1       | ENSG0000018101 | protein_coding;ret   | 1.2182   | 1.9884   | 0.61 | -0.71 | 4.25E-02 | down |
| AC092171   | ENSG0000027308 | lincRNA              | 0.9984   | 1.8404   | 0.54 | -0.88 | 4.25E-02 | down |
| CDKN2C     | ENSG0000012308 | protein_coding       | 14.0162  | 10.8838  | 1.29 | 0.36  | 4.26E-02 | up   |
| RPL7AP6    | ENSG0000024207 | processed_pseudo;    | 90.3271  | 112.4274 | 0.80 | -0.32 | 4.26E-02 | down |
| SLC28A3    | ENSG0000019750 | protein_coding;proc  | 7.9983   | 6.2694   | 1.28 | 0.35  | 4.26E-02 | up   |
| ACAT2      | ENSG0000012043 | processed_transcri   | 31.4501  | 24.6544  | 1.28 | 0.35  | 4.26E-02 | up   |
| NPAS1      | ENSG0000013075 | protein_coding;ret   | 0.8276   | 0.4727   | 1.75 | 0.81  | 4.28E-02 | up   |
| MIR4435-2F | ENSG0000017296 | lincRNA;retained_    | 0.8440   | 1.2190   | 0.69 | -0.53 | 4.29E-02 | down |
| AC022415   | ENSG0000028613 | nonsense_mediate     | 0.8039   | 0.3884   | 2.07 | 1.05  | 4.29E-02 | up   |
| UFL1       | ENSG0000001412 | protein_coding;proc  | 12.6204  | 15.8005  | 0.80 | -0.32 | 4.31E-02 | down |
| TTC7A      | ENSG0000006872 | retained_intron;proc | 2.4936   | 3.6265   | 0.69 | -0.54 | 4.32E-02 | down |
| DHX33      | ENSG0000000510 | protein_coding;no    | 3.7316   | 4.9979   | 0.75 | -0.42 | 4.33E-02 | down |
| RAB37      | ENSG0000017279 | protein_coding;ret   | 4.5376   | 3.2236   | 1.41 | 0.49  | 4.33E-02 | up   |
| PLLP       | ENSG0000010293 | processed_transcri   | 0.1266   | 0.2753   | 0.46 | -1.12 | 4.34E-02 | down |
| EEF2       | ENSG0000016765 | protein_coding;ret   | 455.1860 | 561.6015 | 0.81 | -0.30 | 4.35E-02 | down |
| ANAPC15    | ENSG0000011020 | protein_coding;proc  | 10.2123  | 7.2029   | 1.42 | 0.50  | 4.35E-02 | up   |
| POLR3GL    | ENSG0000012185 | retained_intron;proc | 18.2714  | 13.8817  | 1.32 | 0.40  | 4.35E-02 | up   |
| NBPF10     | ENSG0000027142 | protein_coding       | 0.4654   | 0.7088   | 0.66 | -0.61 | 4.36E-02 | down |
| AC110285   | ENSG0000026287 | lincRNA              | 0.9098   | 0.4708   | 1.93 | 0.95  | 4.36E-02 | up   |
| RTN4RL2    | ENSG0000018690 | protein_coding       | 1.0089   | 0.5631   | 1.79 | 0.84  | 4.37E-02 | up   |
| ERCC6L2    | ENSG0000018215 | nonsense_mediate     | 1.2386   | 1.6960   | 0.73 | -0.45 | 4.37E-02 | down |
| ABCF2      | ENSG0000028529 | protein_coding       | 1.8439   | 3.3544   | 0.55 | -0.86 | 4.38E-02 | down |
| ERCC6L     | ENSG0000018687 | protein_coding       | 5.5500   | 4.1042   | 1.35 | 0.44  | 4.38E-02 | up   |
| HDAC1      | ENSG0000011647 | protein_coding;proc  | 41.0151  | 33.0491  | 1.24 | 0.31  | 4.40E-02 | up   |
| COG8       | ENSG0000021338 | protein_coding;proc  | 3.3317   | 4.3700   | 0.76 | -0.39 | 4.40E-02 | down |
| CCDC142    | ENSG0000013563 | nonsense_mediate     | 3.3448   | 1.6913   | 1.98 | 0.98  | 4.40E-02 | up   |
| C12orf45   | ENSG0000015113 | protein_coding;no    | 0.4604   | 0.6843   | 0.67 | -0.57 | 4.41E-02 | down |
| PLK1       | ENSG0000016685 | retained_intron;proc | 4.6971   | 6.2970   | 0.75 | -0.42 | 4.41E-02 | down |
| ADAR       | ENSG0000016071 | protein_coding;ret   | 13.1335  | 9.8027   | 1.34 | 0.42  | 4.42E-02 | up   |
| ADGRE4P    | ENSG0000026875 | retained_intron;proc | 7.7619   | 5.7062   | 1.36 | 0.44  | 4.42E-02 | up   |
| MIR22HG    | ENSG0000018659 | lincRNA              | 0.2949   | 0.1316   | 2.24 | 1.16  | 4.43E-02 | up   |
| SGPL1      | ENSG0000016622 | protein_coding;proc  | 3.1144   | 2.2915   | 1.36 | 0.44  | 4.44E-02 | up   |
| AC087477   | ENSG0000025927 | lincRNA              | 0.0759   | 0.1490   | 0.51 | -0.97 | 4.45E-02 | down |
| CYB5RL     | ENSG0000021588 | nonsense_mediate     | 2.0324   | 1.3411   | 1.52 | 0.60  | 4.45E-02 | up   |
| RPL10P9    | ENSG0000023391 | processed_pseudo;    | 229.7073 | 283.0081 | 0.81 | -0.30 | 4.45E-02 | down |
| TGFBR1     | ENSG0000010679 | protein_coding;no    | 6.9087   | 11.6939  | 0.59 | -0.76 | 4.45E-02 | down |
| ZNF696     | ENSG0000018573 | protein_coding       | 0.4735   | 0.2452   | 1.93 | 0.95  | 4.45E-02 | up   |
| KIF1BP     | ENSG0000019895 | protein_coding;ret   | 3.4082   | 2.4610   | 1.38 | 0.47  | 4.46E-02 | up   |
| NUDT7      | ENSG0000014087 | processed_transcri   | 2.9482   | 4.4133   | 0.67 | -0.58 | 4.46E-02 | down |
| NDUFB7     | ENSG0000009979 | protein_coding;no    | 123.4390 | 97.1170  | 1.27 | 0.35  | 4.47E-02 | up   |
| LAMTOR1    | ENSG0000014935 | protein_coding;ret   | 16.4788  | 12.5063  | 1.32 | 0.40  | 4.47E-02 | up   |

|           |                |                     |           |           |      |       |          |      |
|-----------|----------------|---------------------|-----------|-----------|------|-------|----------|------|
| HECA      | ENSG0000011240 | protein_coding      | 4.7222    | 6.1724    | 0.77 | -0.39 | 4.48E-02 | down |
| HYOU1     | ENSG0000014942 | protein_coding;no   | 11.3637   | 9.0704    | 1.25 | 0.33  | 4.48E-02 | up   |
| ADH5      | ENSG0000019789 | protein_coding;no   | 18.3940   | 14.7822   | 1.24 | 0.32  | 4.48E-02 | up   |
| XYLT1     | ENSG0000010348 | protein_coding;ret  | 2.2559    | 2.9935    | 0.75 | -0.41 | 4.49E-02 | down |
| RESF1     | ENSG0000017471 | processed_transcri  | 9.6829    | 7.0842    | 1.37 | 0.45  | 4.49E-02 | up   |
| GTF2F2    | ENSG0000018834 | protein_coding;pro  | 11.9136   | 14.8614   | 0.80 | -0.32 | 4.49E-02 | down |
| NCF4      | ENSG0000010036 | protein_coding;pro  | 136.5790  | 110.0311  | 1.24 | 0.31  | 4.50E-02 | up   |
| INSIG2    | ENSG0000012562 | processed_transcri  | 2.7255    | 1.5746    | 1.73 | 0.79  | 4.50E-02 | up   |
| ACSS3     | ENSG0000011105 | processed_transcri  | 0.4143    | 0.2707    | 1.53 | 0.61  | 4.51E-02 | up   |
| CHD8      | ENSG0000010088 | protein_coding;ret  | 2.8597    | 2.2918    | 1.25 | 0.32  | 4.52E-02 | up   |
| UTP6      | ENSG0000010865 | retained_intron;pro | 13.7148   | 16.7931   | 0.82 | -0.29 | 4.52E-02 | down |
| SDHAP1    | ENSG0000018548 | processed_transcri  | 2.9214    | 2.0085    | 1.45 | 0.54  | 4.52E-02 | up   |
| PPAN-P2RY | ENSG0000024320 | protein_coding      | 1.2317    | 0.4339    | 2.84 | 1.51  | 4.52E-02 | up   |
| PTP4A1    | ENSG0000011224 | protein_coding;pro  | 11.7998   | 14.5377   | 0.81 | -0.30 | 4.53E-02 | down |
| ADCY9     | ENSG0000016210 | protein_coding;pro  | 0.5565    | 0.8087    | 0.69 | -0.54 | 4.53E-02 | down |
| RASAL1    | ENSG0000011134 | processed_transcri  | 2.9348    | 2.0990    | 1.40 | 0.48  | 4.54E-02 | up   |
| AC027020  | ENSG0000027012 | lincRNA             | 0.3701    | 0.1742    | 2.12 | 1.09  | 4.54E-02 | up   |
| NR4A1     | ENSG0000012335 | retained_intron;pro | 0.1213    | 0.2173    | 0.56 | -0.84 | 4.55E-02 | down |
| TFDP1     | ENSG0000019817 | nonsense_mediate    | 58.7336   | 47.3898   | 1.24 | 0.31  | 4.55E-02 | up   |
| MYO9B     | ENSG0000009933 | protein_coding;ret  | 5.4476    | 4.2378    | 1.29 | 0.36  | 4.55E-02 | up   |
| IRF7      | ENSG0000018550 | protein_coding;ret  | 0.5774    | 0.3130    | 1.84 | 0.88  | 4.55E-02 | up   |
| VASH1-AS1 | ENSG0000025830 | lincRNA             | 0.4580    | 0.8822    | 0.52 | -0.95 | 4.55E-02 | down |
| ITGA9     | ENSG0000014466 | protein_coding;ret  | 0.4356    | 0.2647    | 1.65 | 0.72  | 4.56E-02 | up   |
| PUDP      | ENSG0000013002 | protein_coding;pro  | 5.0704    | 3.6418    | 1.39 | 0.48  | 4.56E-02 | up   |
| GOLGA2    | ENSG0000016711 | protein_coding;ret  | 5.2650    | 4.0688    | 1.29 | 0.37  | 4.56E-02 | up   |
| AL671277  | ENSG0000022776 | unprocessed_pseu    | 1.9443    | 1.1137    | 1.75 | 0.80  | 4.58E-02 | up   |
| TKFC      | ENSG0000014947 | retained_intron;pro | 0.7882    | 1.1556    | 0.68 | -0.55 | 4.58E-02 | down |
| LSM4      | ENSG0000013052 | protein_coding;ret  | 21.6637   | 31.5861   | 0.69 | -0.54 | 4.58E-02 | down |
| TP53TG1   | ENSG0000018216 | lincRNA             | 1.2225    | 0.6394    | 1.91 | 0.93  | 4.59E-02 | up   |
| AL080250  | ENSG0000022579 | lincRNA             | 1.4297    | 2.2518    | 0.63 | -0.66 | 4.60E-02 | down |
| SPN       | ENSG0000019747 | protein_coding;no   | 19.2249   | 27.4346   | 0.70 | -0.51 | 4.60E-02 | down |
| GTF2IRD2  | ENSG0000019627 | protein_coding;ret  | 0.7737    | 0.4771    | 1.62 | 0.70  | 4.61E-02 | up   |
| DEFA1B    | ENSG0000024024 | protein_coding      | 1536.4421 | 1909.6260 | 0.80 | -0.31 | 4.61E-02 | down |
| KDM6B     | ENSG0000013251 | protein_coding;pro  | 1.3061    | 0.8735    | 1.50 | 0.58  | 4.62E-02 | up   |
| CD55      | ENSG0000019635 | protein_coding;ret  | 16.6409   | 13.3792   | 1.24 | 0.31  | 4.62E-02 | up   |
| CICP14    | ENSG0000028149 | processed_pseudo    | 1.4436    | 0.8955    | 1.61 | 0.69  | 4.62E-02 | up   |
| PFDN4     | ENSG0000010113 | protein_coding;no   | 12.0674   | 15.9518   | 0.76 | -0.40 | 4.64E-02 | down |
| HPGDS     | ENSG0000016310 | protein_coding;ret  | 1.7956    | 1.1216    | 1.60 | 0.68  | 4.64E-02 | up   |
| PPP1R1B   | ENSG0000013177 | protein_coding;ret  | 1.0320    | 0.6619    | 1.56 | 0.64  | 4.64E-02 | up   |
| C8orf59   | ENSG0000017673 | protein_coding;ret  | 18.5365   | 23.1081   | 0.80 | -0.32 | 4.65E-02 | down |
| GPD2      | ENSG0000011515 | protein_coding;no   | 11.7060   | 9.4135    | 1.24 | 0.31  | 4.65E-02 | up   |
| ANKRD18A  | ENSG0000018007 | protein_coding;pro  | 1.8024    | 2.5207    | 0.72 | -0.48 | 4.66E-02 | down |
| SHMT1     | ENSG0000017697 | retained_intron;pro | 2.2322    | 1.6010    | 1.39 | 0.48  | 4.66E-02 | up   |
| SFII      | ENSG0000019808 | protein_coding;ret  | 1.8520    | 1.3548    | 1.37 | 0.45  | 4.67E-02 | up   |
| AMFR      | ENSG0000015946 | protein_coding;ret  | 5.1325    | 3.6983    | 1.39 | 0.47  | 4.67E-02 | up   |
| SUN1      | ENSG0000016482 | retained_intron;pro | 3.5077    | 2.7646    | 1.27 | 0.34  | 4.68E-02 | up   |
| BISPR     | ENSG0000028285 | lincRNA             | 1.0945    | 1.8641    | 0.59 | -0.77 | 4.69E-02 | down |
| IQSEC1    | ENSG0000014471 | protein_coding;pro  | 0.3055    | 0.1794    | 1.70 | 0.77  | 4.69E-02 | up   |

|           |                |                      |          |          |      |       |          |      |
|-----------|----------------|----------------------|----------|----------|------|-------|----------|------|
| NUP43     | ENSG0000012025 | protein_coding;proc  | 13.2802  | 16.5114  | 0.80 | -0.31 | 4.69E-02 | down |
| ZSCAN18   | ENSG0000012141 | protein_coding;ret   | 1.0504   | 0.6344   | 1.66 | 0.73  | 4.70E-02 | up   |
| LAT2      | ENSG0000008673 | protein_coding;ret   | 34.4541  | 43.5657  | 0.79 | -0.34 | 4.70E-02 | down |
| PSME3     | ENSG0000013146 | protein_coding;ret   | 15.9027  | 9.9602   | 1.60 | 0.68  | 4.71E-02 | up   |
| WDR12     | ENSG0000013844 | protein_coding;ret   | 10.1064  | 12.3409  | 0.82 | -0.29 | 4.72E-02 | down |
| RPSAP12   | ENSG0000024008 | processed_pseudo;    | 28.3471  | 16.3410  | 1.73 | 0.79  | 4.73E-02 | up   |
| ZNF517    | ENSG0000019736 | protein_coding;no    | 0.4804   | 0.2437   | 1.97 | 0.98  | 4.73E-02 | up   |
| STAP1     | ENSG0000003572 | protein_coding       | 3.6362   | 2.3233   | 1.57 | 0.65  | 4.73E-02 | up   |
| ACTA2     | ENSG0000010779 | protein_coding;proc  | 0.2845   | 0.1493   | 1.91 | 0.93  | 4.75E-02 | up   |
| CNTF      | ENSG0000024268 | protein_coding       | 0.3868   | 0.6976   | 0.55 | -0.85 | 4.75E-02 | down |
| STK38     | ENSG0000011207 | protein_coding       | 11.8464  | 9.3564   | 1.27 | 0.34  | 4.76E-02 | up   |
| AC008554  | ENSG0000023744 | protein_coding;no    | 1.3979   | 0.8250   | 1.69 | 0.76  | 4.76E-02 | up   |
| SLC27A2   | ENSG0000014028 | protein_coding;ret   | 13.7138  | 10.7003  | 1.28 | 0.36  | 4.76E-02 | up   |
| STAT5B    | ENSG0000017375 | protein_coding;ret   | 6.8119   | 8.4771   | 0.80 | -0.32 | 4.77E-02 | down |
| SPRTN     | ENSG0000001007 | protein_coding;proc  | 1.2901   | 0.7412   | 1.74 | 0.80  | 4.77E-02 | up   |
| GOLGA2P5  | ENSG0000023810 | retained_intron;proc | 1.2646   | 0.8491   | 1.49 | 0.57  | 4.78E-02 | up   |
| PELO      | ENSG0000015268 | protein_coding;proc  | 6.2198   | 4.6770   | 1.33 | 0.41  | 4.79E-02 | up   |
| SERINC5   | ENSG0000016430 | protein_coding;no    | 1.6452   | 2.2216   | 0.74 | -0.43 | 4.80E-02 | down |
| RPS27AP16 | ENSG0000022463 | transcribed_proces   | 68.5635  | 90.2022  | 0.76 | -0.40 | 4.80E-02 | down |
| VEGFA     | ENSG0000011271 | retained_intron;proc | 4.9139   | 6.0544   | 0.81 | -0.30 | 4.80E-02 | down |
| PARP14    | ENSG0000017319 | retained_intron;proc | 1.1773   | 1.6213   | 0.73 | -0.46 | 4.81E-02 | down |
| TSC22D3   | ENSG0000015751 | protein_coding       | 6.6621   | 8.4535   | 0.79 | -0.34 | 4.82E-02 | down |
| SLC39A1   | ENSG0000014357 | protein_coding;proc  | 16.3267  | 12.5310  | 1.30 | 0.38  | 4.82E-02 | up   |
| C17orf49  | ENSG0000025831 | retained_intron;proc | 0.7095   | 1.1801   | 0.60 | -0.73 | 4.82E-02 | down |
| CCDC88B   | ENSG0000016807 | processed_transcri   | 4.8295   | 3.7923   | 1.27 | 0.35  | 4.83E-02 | up   |
| NCOA7     | ENSG0000011191 | protein_coding;proc  | 4.0947   | 5.1949   | 0.79 | -0.34 | 4.83E-02 | down |
| CCNG2     | ENSG0000013876 | protein_coding;proc  | 2.3859   | 1.7167   | 1.39 | 0.47  | 4.83E-02 | up   |
| FBXO6     | ENSG0000011666 | protein_coding;ret   | 6.2114   | 4.3320   | 1.43 | 0.52  | 4.85E-02 | up   |
| AC080038  | ENSG0000001102 | retained_intron;proc | 6.1317   | 4.8157   | 1.27 | 0.35  | 4.86E-02 | up   |
| LIX1L     | ENSG0000027160 | protein_coding       | 3.2553   | 4.4486   | 0.73 | -0.45 | 4.89E-02 | down |
| LINC00665 | ENSG0000023267 | lincRNA              | 3.6281   | 2.7268   | 1.33 | 0.41  | 4.89E-02 | up   |
| MRPL20-AS | ENSG0000022487 | antisense;retained_  | 1.4639   | 2.8126   | 0.52 | -0.94 | 4.89E-02 | down |
| H2AFZ     | ENSG0000016403 | processed_transcri   | 225.0063 | 170.8914 | 1.32 | 0.40  | 4.90E-02 | up   |
| PLCB1     | ENSG0000018262 | protein_coding;proc  | 0.1419   | 0.2411   | 0.59 | -0.76 | 4.91E-02 | down |
| AC000120  | ENSG0000028595 | protein_coding       | 0.2290   | 0.9998   | 0.23 | -2.13 | 4.91E-02 | down |
| CC2D1A    | ENSG0000013202 | protein_coding;ret   | 3.1248   | 2.2616   | 1.38 | 0.47  | 4.91E-02 | up   |
| CIB1      | ENSG0000018504 | protein_coding       | 36.7635  | 45.7966  | 0.80 | -0.32 | 4.91E-02 | down |
| TPRKB     | ENSG0000014403 | protein_coding;ret   | 14.3122  | 18.2375  | 0.78 | -0.35 | 4.91E-02 | down |
| CCDC78    | ENSG0000016200 | retained_intron;proc | 0.2420   | 0.4241   | 0.57 | -0.81 | 4.91E-02 | down |
| QSER1     | ENSG0000006074 | protein_coding;ret   | 2.2728   | 3.0047   | 0.76 | -0.40 | 4.92E-02 | down |
| TRERF1    | ENSG0000012449 | protein_coding       | 5.3501   | 6.6905   | 0.80 | -0.32 | 4.92E-02 | down |
| DIAPH2    | ENSG0000014720 | protein_coding       | 3.2759   | 4.2689   | 0.77 | -0.38 | 4.92E-02 | down |
| DENND5B   | ENSG0000017045 | protein_coding;no    | 0.4161   | 0.2725   | 1.53 | 0.61  | 4.92E-02 | up   |
| CELSR1    | ENSG0000007527 | protein_coding;proc  | 0.0519   | 0.0969   | 0.54 | -0.90 | 4.92E-02 | down |
| FBXL4     | ENSG0000011223 | protein_coding       | 3.9171   | 4.9459   | 0.79 | -0.34 | 4.93E-02 | down |
| AC104794  | ENSG0000026007 | lincRNA              | 3.0571   | 2.0049   | 1.52 | 0.61  | 4.93E-02 | up   |
| EIF2S3    | ENSG0000013074 | processed_transcri   | 77.4946  | 95.9711  | 0.81 | -0.31 | 4.94E-02 | down |
| TBX19     | ENSG0000014317 | processed_transcri   | 0.3925   | 0.6856   | 0.57 | -0.80 | 4.94E-02 | down |

|           |                |                     |         |         |      |       |          |      |
|-----------|----------------|---------------------|---------|---------|------|-------|----------|------|
| IPO7      | ENSG0000020533 | nonsense_mediate    | 44.6892 | 54.8809 | 0.81 | -0.30 | 4.94E-02 | down |
| TSN       | ENSG0000021146 | nonsense_mediate    | 9.5255  | 14.3725 | 0.66 | -0.59 | 4.94E-02 | down |
| MIR222HG  | ENSG0000027006 | lincRNA             | 3.1147  | 4.3513  | 0.72 | -0.48 | 4.95E-02 | down |
| GOLGA4    | ENSG0000014467 | protein_coding;pro  | 2.8785  | 4.1600  | 0.69 | -0.53 | 4.95E-02 | down |
| SSR3      | ENSG0000011485 | retained_intron;pro | 30.8785 | 37.8332 | 0.82 | -0.29 | 4.95E-02 | down |
| CREB3     | ENSG0000010717 | protein_coding;pro  | 10.8169 | 7.8811  | 1.37 | 0.46  | 4.96E-02 | up   |
| FAM219B   | ENSG0000017876 | retained_intron;pro | 5.0137  | 2.9021  | 1.73 | 0.79  | 4.96E-02 | up   |
| PIM2      | ENSG0000010209 | protein_coding;pro  | 3.1807  | 4.4749  | 0.71 | -0.49 | 4.97E-02 | down |
| SLC35F1   | ENSG0000019637 | protein_coding      | 0.1084  | 0.2137  | 0.51 | -0.98 | 4.97E-02 | down |
| EXOC2     | ENSG0000011268 | protein_coding;pro  | 6.2607  | 4.7467  | 1.32 | 0.40  | 4.97E-02 | up   |
| QARS      | ENSG0000017205 | retained_intron;no  | 37.3670 | 46.0917 | 0.81 | -0.30 | 4.98E-02 | down |
| BTBD6     | ENSG0000018488 | retained_intron;pro | 8.2477  | 6.0189  | 1.37 | 0.45  | 4.98E-02 | up   |
| FAM110A   | ENSG0000012589 | protein_coding      | 1.1011  | 0.6821  | 1.61 | 0.69  | 4.99E-02 | up   |
| LINC00115 | ENSG0000022588 | lincRNA             | 1.9529  | 1.1554  | 1.69 | 0.76  | 4.99E-02 | up   |
| MPHOSPH1  | ENSG0000012438 | protein_coding;ret  | 10.6779 | 13.5756 | 0.79 | -0.35 | 5.00E-02 | down |
| DOT1L     | ENSG0000010488 | protein_coding;pro  | 3.0193  | 2.2851  | 1.32 | 0.40  | 5.00E-02 | up   |



**Supplementary Table 4. GO enrichment analysis of differentially expressed genes.**

| GO_ID      | GO_Term                          | GO_fu<br>nction | GO_cl<br>ass | S.gene.<br>numbe<br>r | TS.gen<br>e.num<br>ber | B.gene<br>.numb<br>er | TB.gen<br>e.numb<br>er | pvalue   |
|------------|----------------------------------|-----------------|--------------|-----------------------|------------------------|-----------------------|------------------------|----------|
| GO:0019221 | cytokine-mediated signaling pa   | BP              | 6            | 27                    | 562                    | 295                   | 19809                  | 9.91E-08 |
| GO:0009986 | cell surface                     | CC              | 4            | 42                    | 562                    | 623                   | 19809                  | 2.17E-07 |
| GO:0006955 | immune response                  | BP              | 4            | 36                    | 562                    | 494                   | 19809                  | 2.57E-07 |
| GO:0050729 | positive regulation of inflamm   | BP              | 9            | 13                    | 562                    | 85                    | 19809                  | 7.66E-07 |
| GO:0009897 | external side of plasma membr    | CC              | 5            | 28                    | 562                    | 357                   | 19809                  | 1.35E-06 |
| GO:0006954 | inflammatory response            | BP              | 6            | 28                    | 562                    | 382                   | 19809                  | 5.00E-06 |
| GO:0071276 | cellular response to cadmium i   | BP              | 8            | 8                     | 562                    | 37                    | 19809                  | 7.46E-06 |
| GO:0007155 | cell adhesion                    | BP              | 4            | 38                    | 562                    | 631                   | 19809                  | 1.17E-05 |
| GO:0030198 | extracellular matrix organizati  | BP              | 6            | 20                    | 562                    | 235                   | 19809                  | 1.34E-05 |
| GO:0097191 | extrinsic apoptotic signaling pa | BP              | 6            | 8                     | 562                    | 45                    | 19809                  | 3.41E-05 |
| GO:0062023 | collagen-containing extracellu   | CC              | 5            | 25                    | 562                    | 361                   | 19809                  | 4.11E-05 |
| GO:0005886 | plasma membrane                  | CC              | 4            | 182                   | 562                    | 5001                  | 19809                  | 7.01E-05 |
| GO:0036018 | cellular response to erythropoi  | BP              | 8            | 3                     | 562                    | 4                     | 19809                  | 8.89E-05 |
| GO:2000391 | positive regulation of neutroph  | BP              | 9            | 3                     | 562                    | 4                     | 19809                  | 8.89E-05 |
| GO:0050901 | leukocyte tethering or rolling   | BP              | 8            | 5                     | 562                    | 18                    | 19809                  | 1.14E-04 |
| GO:0043068 | positive regulation of program   | BP              | 8            | 4                     | 562                    | 10                    | 19809                  | 1.17E-04 |
| GO:0000790 | nuclear chromatin                | CC              | 7            | 18                    | 562                    | 235                   | 19809                  | 1.39E-04 |
| GO:0004896 | cytokine receptor activity       | MF              | 6            | 8                     | 562                    | 55                    | 19809                  | 1.50E-04 |
| GO:0001525 | angiogenesis                     | BP              | 5            | 19                    | 562                    | 258                   | 19809                  | 1.53E-04 |
| GO:0002376 | immune system process            | BP              | 3            | 39                    | 562                    | 740                   | 19809                  | 1.64E-04 |
| GO:0030728 | ovulation                        | BP              | 5            | 4                     | 562                    | 11                    | 19809                  | 1.80E-04 |
| GO:0002576 | platelet degranulation           | BP              | 9            | 12                    | 562                    | 122                   | 19809                  | 1.84E-04 |
| GO:0019955 | cytokine binding                 | MF              | 5            | 7                     | 562                    | 43                    | 19809                  | 1.89E-04 |
| GO:0043235 | receptor complex                 | CC              | 4            | 16                    | 562                    | 204                   | 19809                  | 2.46E-04 |
| GO:0071711 | basement membrane organizat      | BP              | 7            | 4                     | 562                    | 12                    | 19809                  | 2.65E-04 |
| GO:0043312 | neutrophil degranulation         | BP              | 9            | 28                    | 562                    | 481                   | 19809                  | 2.87E-04 |
| GO:0007267 | cell-cell signaling              | BP              | 5            | 17                    | 562                    | 231                   | 19809                  | 3.38E-04 |
| GO:0005887 | integral component of plasma m   | CC              | 6            | 61                    | 562                    | 1378                  | 19809                  | 3.63E-04 |
| GO:0070374 | positive regulation of ERK1 ar   | BP              | 12           | 16                    | 562                    | 213                   | 19809                  | 4.00E-04 |
| GO:1901166 | neural crest cell migration inv  | BP              | 9            | 3                     | 562                    | 6                     | 19809                  | 4.26E-04 |
| GO:0061312 | BMP signaling pathway invol      | BP              | 11           | 3                     | 562                    | 6                     | 19809                  | 4.26E-04 |
| GO:0010273 | detoxification of copper ion     | BP              | 5            | 4                     | 562                    | 14                    | 19809                  | 5.11E-04 |
| GO:0010955 | negative regulation of protein j | BP              | 10           | 4                     | 562                    | 14                    | 19809                  | 5.11E-04 |
| GO:0071773 | cellular response to BMP stim    | BP              | 8            | 6                     | 562                    | 37                    | 19809                  | 5.58E-04 |
| GO:0005615 | extracellular space              | CC              | 4            | 75                    | 562                    | 1812                  | 19809                  | 5.64E-04 |
| GO:0030667 | secretory granule membrane       | CC              | 7            | 10                    | 562                    | 101                   | 19809                  | 5.93E-04 |
| GO:0043394 | proteoglycan binding             | MF              | 5            | 4                     | 562                    | 15                    | 19809                  | 6.82E-04 |
| GO:0033540 | fatty acid beta-oxidation using  | BP              | 12           | 4                     | 562                    | 15                    | 19809                  | 6.82E-04 |
| GO:0016021 | integral component of membra     | CC              | 5            | 192                   | 562                    | 5545                  | 19809                  | 6.82E-04 |
| GO:0071280 | cellular response to copper ion  | BP              | 8            | 5                     | 562                    | 26                    | 19809                  | 7.25E-04 |
| GO:0004908 | interleukin-1 receptor activity  | MF              | 7            | 3                     | 562                    | 7                     | 19809                  | 7.30E-04 |
| GO:0090210 | regulation of establishment of   | BP              | 8            | 2                     | 562                    | 2                     | 19809                  | 8.04E-04 |
| GO:0047017 | prostaglandin-F synthase activ   | MF              | 7            | 2                     | 562                    | 2                     | 19809                  | 8.04E-04 |
| GO:0010725 | regulation of primitive erythro  | BP              | 9            | 2                     | 562                    | 2                     | 19809                  | 8.04E-04 |
| GO:0070488 | neutrophil aggregation           | BP              | 8            | 2                     | 562                    | 2                     | 19809                  | 8.04E-04 |
| GO:0035854 | eosinophil fate commitment       | BP              | 6            | 2                     | 562                    | 2                     | 19809                  | 8.04E-04 |

|            |                                  |    |    |    |     |      |       |          |
|------------|----------------------------------|----|----|----|-----|------|-------|----------|
| GO:1904835 | dorsal root ganglion morphoge    | BP | 7  | 2  | 562 | 2    | 19809 | 8.04E-04 |
| GO:0004339 | glucan 1,4-alpha-glucosidase a   | MF | 8  | 2  | 562 | 2    | 19809 | 8.04E-04 |
| GO:0097154 | GABAergic neuron differentia     | BP | 7  | 2  | 562 | 2    | 19809 | 8.04E-04 |
| GO:0017116 | single-stranded DNA-depende      | MF | 12 | 2  | 562 | 2    | 19809 | 8.04E-04 |
| GO:0021649 | vestibulocochlear nerve struct   | BP | 6  | 2  | 562 | 2    | 19809 | 8.04E-04 |
| GO:0051493 | regulation of cytoskeleton orga  | BP | 8  | 5  | 562 | 27   | 19809 | 8.69E-04 |
| GO:0071407 | cellular response to organic cy  | BP | 7  | 8  | 562 | 71   | 19809 | 8.84E-04 |
| GO:0034113 | heterotypic cell-cell adhesion   | BP | 6  | 5  | 562 | 28   | 19809 | 1.03E-03 |
| GO:0045121 | membrane raft                    | CC | 6  | 16 | 562 | 233  | 19809 | 1.05E-03 |
| GO:0045766 | positive regulation of angioger  | BP | 8  | 12 | 562 | 148  | 19809 | 1.07E-03 |
| GO:0007566 | embryo implantation              | BP | 4  | 6  | 562 | 42   | 19809 | 1.12E-03 |
| GO:0031092 | platelet alpha granule membra    | CC | 8  | 4  | 562 | 17   | 19809 | 1.14E-03 |
| GO:0061626 | pharyngeal arch artery morpho    | BP | 8  | 3  | 562 | 8    | 19809 | 1.14E-03 |
| GO:0031666 | positive regulation of lipopoly: | BP | 8  | 3  | 562 | 8    | 19809 | 1.14E-03 |
| GO:0005577 | fibrinogen complex               | CC | 4  | 3  | 562 | 8    | 19809 | 1.14E-03 |
| GO:0008285 | negative regulation of cell pop  | BP | 7  | 25 | 562 | 450  | 19809 | 1.16E-03 |
| GO:0021983 | pituitary gland development      | BP | 7  | 5  | 562 | 29   | 19809 | 1.22E-03 |
| GO:0008305 | integrin complex                 | CC | 5  | 5  | 562 | 29   | 19809 | 1.22E-03 |
| GO:0050727 | regulation of inflammatory res   | BP | 8  | 8  | 562 | 75   | 19809 | 1.27E-03 |
| GO:0045926 | negative regulation of growth    | BP | 6  | 4  | 562 | 18   | 19809 | 1.43E-03 |
| GO:0045648 | positive regulation of erythrocy | BP | 9  | 5  | 562 | 30   | 19809 | 1.43E-03 |
| GO:0043025 | neuronal cell body               | CC | 5  | 23 | 562 | 407  | 19809 | 1.44E-03 |
| GO:0101003 | ficolin-1-rich granule membra    | CC | 8  | 7  | 562 | 60   | 19809 | 1.50E-03 |
| GO:0009611 | response to wounding             | BP | 5  | 8  | 562 | 77   | 19809 | 1.51E-03 |
| GO:0051897 | positive regulation of protein k | BP | 10 | 13 | 562 | 177  | 19809 | 1.67E-03 |
| GO:0002523 | leukocyte migration involved i   | BP | 5  | 3  | 562 | 9    | 19809 | 1.68E-03 |
| GO:0021612 | facial nerve structural organiz  | BP | 6  | 3  | 562 | 9    | 19809 | 1.68E-03 |
| GO:0014049 | positive regulation of glutamat  | BP | 10 | 3  | 562 | 9    | 19809 | 1.68E-03 |
| GO:0005102 | signaling receptor binding       | MF | 5  | 23 | 562 | 413  | 19809 | 1.74E-03 |
| GO:0050718 | positive regulation of interleuk | BP | 10 | 5  | 562 | 32   | 19809 | 1.93E-03 |
| GO:0007166 | cell surface receptor signaling  | BP | 5  | 17 | 562 | 271  | 19809 | 1.99E-03 |
| GO:1904707 | positive regulation of vascular  | BP | 9  | 6  | 562 | 47   | 19809 | 2.03E-03 |
| GO:0032526 | response to retinoic acid        | BP | 6  | 6  | 562 | 47   | 19809 | 2.03E-03 |
| GO:0008201 | heparin binding                  | MF | 6  | 12 | 562 | 161  | 19809 | 2.19E-03 |
| GO:0052650 | NADP-retinol dehydrogenase :     | MF | 9  | 3  | 562 | 10   | 19809 | 2.35E-03 |
| GO:0071322 | cellular response to carbohydr   | BP | 7  | 2  | 562 | 3    | 19809 | 2.37E-03 |
| GO:0021828 | gonadotrophin-releasing hormo    | BP | 8  | 2  | 562 | 3    | 19809 | 2.37E-03 |
| GO:0032301 | MutSalpha complex                | CC | 6  | 2  | 562 | 3    | 19809 | 2.37E-03 |
| GO:0004165 | dodecenoyl-CoA delta-isomer      | MF | 7  | 2  | 562 | 3    | 19809 | 2.37E-03 |
| GO:1903375 | facioacoustic ganglion develop   | BP | 8  | 2  | 562 | 3    | 19809 | 2.37E-03 |
| GO:0032602 | chemokine production             | BP | 5  | 2  | 562 | 3    | 19809 | 2.37E-03 |
| GO:1905517 | macrophage migration             | BP | 6  | 2  | 562 | 3    | 19809 | 2.37E-03 |
| GO:0097374 | sensory neuron axon guidance     | BP | 7  | 2  | 562 | 3    | 19809 | 2.37E-03 |
| GO:0071415 | cellular response to purine-con  | BP | 8  | 2  | 562 | 3    | 19809 | 2.37E-03 |
| GO:0010574 | regulation of vascular endothe   | BP | 7  | 2  | 562 | 3    | 19809 | 2.37E-03 |
| GO:0021533 | cell differentiation in hindbrai | BP | 6  | 2  | 562 | 3    | 19809 | 2.37E-03 |
| GO:0003779 | actin binding                    | MF | 6  | 21 | 562 | 374  | 19809 | 2.46E-03 |
| GO:0005576 | extracellular region             | CC | 3  | 91 | 562 | 2407 | 19809 | 2.49E-03 |
| GO:0019838 | growth factor binding            | MF | 5  | 6  | 562 | 49   | 19809 | 2.52E-03 |
| GO:0030425 | dendrite                         | CC | 6  | 24 | 562 | 455  | 19809 | 2.84E-03 |

|            |                                   |    |    |    |     |     |       |          |
|------------|-----------------------------------|----|----|----|-----|-----|-------|----------|
| GO:0060333 | interferon-gamma-mediated si      | BP | 7  | 7  | 562 | 67  | 19809 | 2.85E-03 |
| GO:0001707 | mesoderm formation                | BP | 6  | 5  | 562 | 35  | 19809 | 2.90E-03 |
| GO:0001975 | response to amphetamine           | BP | 6  | 5  | 562 | 35  | 19809 | 2.90E-03 |
| GO:0045765 | regulation of angiogenesis        | BP | 7  | 5  | 562 | 35  | 19809 | 2.90E-03 |
| GO:0008360 | regulation of cell shape          | BP | 8  | 11 | 562 | 146 | 19809 | 3.03E-03 |
| GO:0030424 | axon                              | CC | 6  | 21 | 562 | 381 | 19809 | 3.05E-03 |
| GO:0071294 | cellular response to zinc ion     | BP | 8  | 4  | 562 | 22  | 19809 | 3.12E-03 |
| GO:0017154 | semaphorin receptor activity      | MF | 6  | 3  | 562 | 11  | 19809 | 3.16E-03 |
| GO:0008329 | signaling pattern recognition r   | MF | 6  | 3  | 562 | 11  | 19809 | 3.16E-03 |
| GO:0071803 | positive regulation of podoson    | BP | 8  | 3  | 562 | 11  | 19809 | 3.16E-03 |
| GO:1904996 | positive regulation of leukocyt   | BP | 9  | 3  | 562 | 11  | 19809 | 3.16E-03 |
| GO:2001241 | positive regulation of extrinsic  | BP | 11 | 3  | 562 | 11  | 19809 | 3.16E-03 |
| GO:0002116 | semaphorin receptor complex       | CC | 5  | 3  | 562 | 11  | 19809 | 3.16E-03 |
| GO:0050786 | RAGE receptor binding             | MF | 6  | 3  | 562 | 11  | 19809 | 3.16E-03 |
| GO:0030154 | cell differentiation              | BP | 5  | 42 | 562 | 952 | 19809 | 3.18E-03 |
| GO:0001649 | osteoblast differentiation        | BP | 6  | 9  | 562 | 106 | 19809 | 3.20E-03 |
| GO:0010595 | positive regulation of endothel   | BP | 10 | 6  | 562 | 52  | 19809 | 3.42E-03 |
| GO:0030165 | PDZ domain binding                | MF | 6  | 8  | 562 | 88  | 19809 | 3.51E-03 |
| GO:0009617 | response to bacterium             | BP | 7  | 9  | 562 | 108 | 19809 | 3.63E-03 |
| GO:0008015 | blood circulation                 | BP | 6  | 5  | 562 | 37  | 19809 | 3.72E-03 |
| GO:0048469 | cell maturation                   | BP | 5  | 5  | 562 | 37  | 19809 | 3.72E-03 |
| GO:0005178 | integrin binding                  | MF | 6  | 10 | 562 | 129 | 19809 | 3.76E-03 |
| GO:0030168 | platelet activation               | BP | 5  | 9  | 562 | 109 | 19809 | 3.86E-03 |
| GO:0070098 | chemokine-mediated signaling      | BP | 7  | 7  | 562 | 71  | 19809 | 3.95E-03 |
| GO:1990909 | Wnt signalosome                   | CC | 4  | 3  | 562 | 12  | 19809 | 4.13E-03 |
| GO:0002430 | complement receptor mediated      | BP | 7  | 3  | 562 | 12  | 19809 | 4.13E-03 |
| GO:2000300 | regulation of synaptic vesicle e  | BP | 7  | 6  | 562 | 54  | 19809 | 4.13E-03 |
| GO:0030501 | positive regulation of bone mir   | BP | 8  | 5  | 562 | 38  | 19809 | 4.18E-03 |
| GO:0005201 | extracellular matrix structural   | MF | 4  | 10 | 562 | 131 | 19809 | 4.20E-03 |
| GO:1903561 | extracellular vesicle             | CC | 6  | 6  | 562 | 55  | 19809 | 4.53E-03 |
| GO:0001701 | in utero embryonic developme      | BP | 8  | 13 | 562 | 199 | 19809 | 4.59E-03 |
| GO:0097490 | sympathetic neuron projection     | BP | 7  | 2  | 562 | 4   | 19809 | 4.64E-03 |
| GO:0097491 | sympathetic neuron projection     | BP | 6  | 2  | 562 | 4   | 19809 | 4.64E-03 |
| GO:0001839 | neural plate morphogenesis        | BP | 8  | 2  | 562 | 4   | 19809 | 4.64E-03 |
| GO:1902285 | semaphorin-plexin signaling p     | BP | 7  | 2  | 562 | 4   | 19809 | 4.64E-03 |
| GO:0051599 | response to hydrostatic pressu    | BP | 5  | 2  | 562 | 4   | 19809 | 4.64E-03 |
| GO:0032280 | symmetric synapse                 | CC | 5  | 2  | 562 | 4   | 19809 | 4.64E-03 |
| GO:0035662 | Toll-like receptor 4 binding      | MF | 7  | 2  | 562 | 4   | 19809 | 4.64E-03 |
| GO:0036486 | ventral trunk neural crest cell r | BP | 10 | 2  | 562 | 4   | 19809 | 4.64E-03 |
| GO:0045123 | cellular extravasation            | BP | 5  | 2  | 562 | 4   | 19809 | 4.64E-03 |
| GO:0036438 | maintenance of lens transparer    | BP | 8  | 2  | 562 | 4   | 19809 | 4.64E-03 |
| GO:0001845 | phagolysosome assembly            | BP | 9  | 2  | 562 | 4   | 19809 | 4.64E-03 |
| GO:0002724 | regulation of T cell cytokine p   | BP | 10 | 2  | 562 | 4   | 19809 | 4.64E-03 |
| GO:0032010 | phagolysosome                     | CC | 10 | 2  | 562 | 4   | 19809 | 4.64E-03 |
| GO:0061309 | cardiac neural crest cell develc  | BP | 9  | 2  | 562 | 4   | 19809 | 4.64E-03 |
| GO:0014054 | positive regulation of gamma-ε    | BP | 9  | 2  | 562 | 4   | 19809 | 4.64E-03 |
| GO:0032119 | sequestering of zinc ion          | BP | 6  | 2  | 562 | 4   | 19809 | 4.64E-03 |
| GO:0002667 | regulation of T cell anergy       | BP | 8  | 2  | 562 | 4   | 19809 | 4.64E-03 |
| GO:0044752 | response to human chorionic g     | BP | 7  | 2  | 562 | 4   | 19809 | 4.64E-03 |
| GO:2001198 | regulation of dendritic cell difl | BP | 8  | 2  | 562 | 4   | 19809 | 4.64E-03 |

|            |                                   |    |    |    |     |      |       |          |
|------------|-----------------------------------|----|----|----|-----|------|-------|----------|
| GO:0099626 | voltage-gated calcium channel     | MF | 11 | 2  | 562 | 4    | 19809 | 4.64E-03 |
| GO:0003266 | regulation of secondary heart f   | BP | 10 | 2  | 562 | 4    | 19809 | 4.64E-03 |
| GO:0010469 | regulation of signaling recepto   | BP | 8  | 23 | 562 | 450  | 19809 | 5.02E-03 |
| GO:0051894 | positive regulation of focal adl  | BP | 9  | 4  | 562 | 25   | 19809 | 5.05E-03 |
| GO:0021854 | hypothalamus development          | BP | 5  | 3  | 562 | 13   | 19809 | 5.25E-03 |
| GO:0035641 | locomotory exploration behavi     | BP | 5  | 3  | 562 | 13   | 19809 | 5.25E-03 |
| GO:0090162 | establishment of epithelial cell  | BP | 6  | 3  | 562 | 13   | 19809 | 5.25E-03 |
| GO:0030278 | regulation of ossification        | BP | 6  | 3  | 562 | 13   | 19809 | 5.25E-03 |
| GO:0007229 | integrin-mediated signaling pa    | BP | 6  | 8  | 562 | 94   | 19809 | 5.26E-03 |
| GO:0019233 | sensory perception of pain        | BP | 7  | 6  | 562 | 57   | 19809 | 5.41E-03 |
| GO:0034599 | cellular response to oxidative s  | BP | 6  | 8  | 562 | 95   | 19809 | 5.60E-03 |
| GO:0016209 | antioxidant activity              | MF | 3  | 4  | 562 | 26   | 19809 | 5.83E-03 |
| GO:0001756 | somitogenesis                     | BP | 7  | 6  | 562 | 58   | 19809 | 5.89E-03 |
| GO:0071346 | cellular response to interferon-  | BP | 8  | 8  | 562 | 96   | 19809 | 5.96E-03 |
| GO:0007568 | aging                             | BP | 4  | 12 | 562 | 183  | 19809 | 6.15E-03 |
| GO:0070062 | extracellular exosome             | CC | 7  | 80 | 562 | 2142 | 19809 | 6.26E-03 |
| GO:0005925 | focal adhesion                    | CC | 7  | 21 | 562 | 407  | 19809 | 6.45E-03 |
| GO:0099509 | regulation of presynaptic cytos   | BP | 13 | 3  | 562 | 14   | 19809 | 6.55E-03 |
| GO:0030502 | negative regulation of bone mi    | BP | 8  | 3  | 562 | 14   | 19809 | 6.55E-03 |
| GO:0050710 | negative regulation of cytokine   | BP | 8  | 3  | 562 | 14   | 19809 | 6.55E-03 |
| GO:0045087 | innate immune response            | BP | 5  | 25 | 562 | 514  | 19809 | 6.57E-03 |
| GO:0030246 | carbohydrate binding              | MF | 4  | 13 | 562 | 210  | 19809 | 7.14E-03 |
| GO:0008270 | zinc ion binding                  | MF | 8  | 36 | 562 | 825  | 19809 | 7.20E-03 |
| GO:0042803 | protein homodimerization activ    | MF | 6  | 37 | 562 | 855  | 19809 | 7.37E-03 |
| GO:0002693 | positive regulation of cellular c | BP | 8  | 2  | 562 | 5    | 19809 | 7.59E-03 |
| GO:0047023 | androsterone dehydrogenase ac     | MF | 7  | 2  | 562 | 5    | 19809 | 7.59E-03 |
| GO:0002925 | positive regulation of humoral    | BP | 12 | 2  | 562 | 5    | 19809 | 7.59E-03 |
| GO:0071621 | granulocyte chemotaxis            | BP | 6  | 2  | 562 | 5    | 19809 | 7.59E-03 |
| GO:0048385 | regulation of retinoic acid rece  | BP | 8  | 2  | 562 | 5    | 19809 | 7.59E-03 |
| GO:0048318 | axial mesoderm development        | BP | 7  | 2  | 562 | 5    | 19809 | 7.59E-03 |
| GO:0031726 | CCR1 chemokine receptor bin       | MF | 9  | 2  | 562 | 5    | 19809 | 7.59E-03 |
| GO:2000321 | positive regulation of T-helper   | BP | 9  | 2  | 562 | 5    | 19809 | 7.59E-03 |
| GO:0061551 | trigeminal ganglion developme     | BP | 8  | 2  | 562 | 5    | 19809 | 7.59E-03 |
| GO:0050544 | arachidonic acid binding          | MF | 8  | 2  | 562 | 5    | 19809 | 7.59E-03 |
| GO:0032783 | ELL-EAF complex                   | CC | 5  | 2  | 562 | 5    | 19809 | 7.59E-03 |
| GO:0050798 | activated T cell proliferation    | BP | 9  | 2  | 562 | 5    | 19809 | 7.59E-03 |
| GO:0021637 | trigeminal nerve structural org   | BP | 6  | 2  | 562 | 5    | 19809 | 7.59E-03 |
| GO:0070051 | fibrinogen binding                | MF | 5  | 2  | 562 | 5    | 19809 | 7.59E-03 |
| GO:0034103 | regulation of tissue remodeling   | BP | 6  | 2  | 562 | 5    | 19809 | 7.59E-03 |
| GO:0007044 | cell-substrate junction assembl   | BP | 7  | 2  | 562 | 5    | 19809 | 7.59E-03 |
| GO:0051495 | positive regulation of cytoskel   | BP | 9  | 2  | 562 | 5    | 19809 | 7.59E-03 |
| GO:0045345 | positive regulation of MHC cla    | BP | 9  | 2  | 562 | 5    | 19809 | 7.59E-03 |
| GO:0050728 | negative regulation of inflamm    | BP | 9  | 9  | 562 | 121  | 19809 | 7.61E-03 |
| GO:0006882 | cellular zinc ion homeostasis     | BP | 12 | 4  | 562 | 28   | 19809 | 7.64E-03 |
| GO:0001569 | branching involved in blood ve    | BP | 7  | 4  | 562 | 28   | 19809 | 7.64E-03 |
| GO:0051602 | response to electrical stimulus   | BP | 5  | 4  | 562 | 28   | 19809 | 7.64E-03 |
| GO:2001234 | negative regulation of apoptoti   | BP | 9  | 4  | 562 | 28   | 19809 | 7.64E-03 |
| GO:0043547 | positive regulation of GTPase     | BP | 8  | 18 | 562 | 336  | 19809 | 7.76E-03 |
| GO:0030036 | actin cytoskeleton organizatio    | BP | 7  | 11 | 562 | 166  | 19809 | 7.90E-03 |
| GO:0031091 | platelet alpha granule            | CC | 9  | 3  | 562 | 15   | 19809 | 8.01E-03 |

|            |                                   |    |    |    |     |      |       |          |
|------------|-----------------------------------|----|----|----|-----|------|-------|----------|
| GO:0045028 | G protein-coupled purinergic r    | MF | 8  | 3  | 562 | 15   | 19809 | 8.01E-03 |
| GO:0035589 | G protein-coupled purinergic r    | BP | 7  | 3  | 562 | 15   | 19809 | 8.01E-03 |
| GO:0071560 | cellular response to transformi   | BP | 8  | 6  | 562 | 62   | 19809 | 8.14E-03 |
| GO:0071944 | cell periphery                    | CC | 4  | 6  | 562 | 62   | 19809 | 8.14E-03 |
| GO:0000187 | activation of MAPK activity       | BP | 13 | 9  | 562 | 123  | 19809 | 8.44E-03 |
| GO:0007517 | muscle organ development          | BP | 6  | 8  | 562 | 102  | 19809 | 8.52E-03 |
| GO:0030593 | neutrophil chemotaxis             | BP | 7  | 7  | 562 | 82   | 19809 | 8.66E-03 |
| GO:0035987 | endodermal cell differentiator    | BP | 6  | 4  | 562 | 29   | 19809 | 8.67E-03 |
| GO:0009968 | negative regulation of signal tr  | BP | 8  | 6  | 562 | 64   | 19809 | 9.47E-03 |
| GO:0007399 | nervous system development        | BP | 6  | 25 | 562 | 530  | 19809 | 9.48E-03 |
| GO:0010718 | positive regulation of epithelia  | BP | 8  | 5  | 562 | 46   | 19809 | 9.49E-03 |
| GO:0051044 | positive regulation of membrai    | BP | 9  | 3  | 562 | 16   | 19809 | 9.66E-03 |
| GO:0048485 | sympathetic nervous system de     | BP | 6  | 3  | 562 | 16   | 19809 | 9.66E-03 |
| GO:0038084 | vascular endothelial growth fa    | BP | 8  | 3  | 562 | 16   | 19809 | 9.66E-03 |
| GO:0007492 | endoderm development              | BP | 6  | 4  | 562 | 30   | 19809 | 9.78E-03 |
| GO:0050832 | defense response to fungus        | BP | 8  | 4  | 562 | 30   | 19809 | 9.78E-03 |
| GO:0071456 | cellular response to hypoxia      | BP | 6  | 9  | 562 | 126  | 19809 | 9.81E-03 |
| GO:0007275 | multicellular organism develop    | BP | 4  | 46 | 562 | 1138 | 19809 | 1.01E-02 |
| GO:0005518 | collagen binding                  | MF | 5  | 6  | 562 | 65   | 19809 | 1.02E-02 |
| GO:0060337 | type I interferon signaling path  | BP | 7  | 6  | 562 | 65   | 19809 | 1.02E-02 |
| GO:0006919 | activation of cysteine-type end   | BP | 11 | 7  | 562 | 85   | 19809 | 1.05E-02 |
| GO:0043388 | positive regulation of DNA bir    | BP | 7  | 4  | 562 | 31   | 19809 | 1.10E-02 |
| GO:0048873 | homeostasis of number of cells    | BP | 8  | 4  | 562 | 31   | 19809 | 1.10E-02 |
| GO:0050840 | extracellular matrix binding      | MF | 4  | 4  | 562 | 31   | 19809 | 1.10E-02 |
| GO:0019966 | interleukin-1 binding             | MF | 6  | 2  | 562 | 6    | 19809 | 1.12E-02 |
| GO:0016671 | oxidoreductase activity, acting   | MF | 6  | 2  | 562 | 6    | 19809 | 1.12E-02 |
| GO:0060385 | axonogenesis involved in inne     | BP | 10 | 2  | 562 | 6    | 19809 | 1.12E-02 |
| GO:0098885 | modification of postsynaptic a    | BP | 8  | 2  | 562 | 6    | 19809 | 1.12E-02 |
| GO:0031630 | regulation of synaptic vesicle f  | BP | 9  | 2  | 562 | 6    | 19809 | 1.12E-02 |
| GO:0016004 | phospholipase activator activit   | MF | 7  | 2  | 562 | 6    | 19809 | 1.12E-02 |
| GO:0004630 | phospholipase D activity          | MF | 8  | 2  | 562 | 6    | 19809 | 1.12E-02 |
| GO:0031670 | cellular response to nutrient     | BP | 8  | 2  | 562 | 6    | 19809 | 1.12E-02 |
| GO:0047035 | testosterone dehydrogenase (N     | MF | 7  | 2  | 562 | 6    | 19809 | 1.12E-02 |
| GO:0048505 | regulation of timing of cell dif  | BP | 7  | 2  | 562 | 6    | 19809 | 1.12E-02 |
| GO:0043141 | ATP-dependent 5'-3' DNA heli      | MF | 12 | 2  | 562 | 6    | 19809 | 1.12E-02 |
| GO:0021785 | branchiomotor neuron axon gu      | BP | 8  | 2  | 562 | 6    | 19809 | 1.12E-02 |
| GO:0043619 | regulation of transcription fro   | BP | 11 | 2  | 562 | 6    | 19809 | 1.12E-02 |
| GO:0010757 | negative regulation of plasmin    | BP | 11 | 2  | 562 | 6    | 19809 | 1.12E-02 |
| GO:0042415 | norepinephrine metabolic proc     | BP | 9  | 2  | 562 | 6    | 19809 | 1.12E-02 |
| GO:1904628 | cellular response to phorbol 13   | BP | 7  | 2  | 562 | 6    | 19809 | 1.12E-02 |
| GO:0032962 | positive regulation of inositol t | BP | 11 | 2  | 562 | 6    | 19809 | 1.12E-02 |
| GO:0032924 | activin receptor signaling path   | BP | 8  | 3  | 562 | 17   | 19809 | 1.15E-02 |
| GO:0050995 | negative regulation of lipid cat  | BP | 8  | 3  | 562 | 17   | 19809 | 1.15E-02 |
| GO:0030224 | monocyte differentiation          | BP | 8  | 3  | 562 | 17   | 19809 | 1.15E-02 |
| GO:0031093 | platelet alpha granule lumen      | CC | 8  | 6  | 562 | 67   | 19809 | 1.17E-02 |
| GO:0006909 | phagocytosis                      | BP | 7  | 6  | 562 | 67   | 19809 | 1.17E-02 |
| GO:0001934 | positive regulation of protein p  | BP | 10 | 11 | 562 | 176  | 19809 | 1.19E-02 |
| GO:0005164 | tumor necrosis factor receptor    | MF | 8  | 4  | 562 | 32   | 19809 | 1.23E-02 |
| GO:0042113 | B cell activation                 | BP | 7  | 4  | 562 | 32   | 19809 | 1.23E-02 |
| GO:0032355 | response to estradiol             | BP | 6  | 8  | 562 | 109  | 19809 | 1.24E-02 |

|            |                                   |    |    |    |     |     |       |          |
|------------|-----------------------------------|----|----|----|-----|-----|-------|----------|
| GO:0009612 | response to mechanical stimuli    | BP | 5  | 6  | 562 | 68  | 19809 | 1.26E-02 |
| GO:0043195 | terminal bouton                   | CC | 6  | 5  | 562 | 50  | 19809 | 1.34E-02 |
| GO:0043122 | regulation of I-kappaB kinase/    | BP | 9  | 3  | 562 | 18  | 19809 | 1.35E-02 |
| GO:0003203 | endocardial cushion morphoge      | BP | 7  | 3  | 562 | 18  | 19809 | 1.35E-02 |
| GO:0014911 | positive regulation of smooth r   | BP | 9  | 3  | 562 | 18  | 19809 | 1.35E-02 |
| GO:0099092 | postsynaptic density, intracellu  | CC | 5  | 3  | 562 | 18  | 19809 | 1.35E-02 |
| GO:0043204 | perikaryon                        | CC | 5  | 9  | 562 | 133 | 19809 | 1.36E-02 |
| GO:0048247 | lymphocyte chemotaxis             | BP | 6  | 4  | 562 | 33  | 19809 | 1.37E-02 |
| GO:0060828 | regulation of canonical Wnt si    | BP | 9  | 4  | 562 | 33  | 19809 | 1.37E-02 |
| GO:0045893 | positive regulation of transcrip  | BP | 9  | 28 | 562 | 632 | 19809 | 1.38E-02 |
| GO:0060326 | cell chemotaxis                   | BP | 6  | 7  | 562 | 90  | 19809 | 1.41E-02 |
| GO:0045652 | regulation of megakaryocyte d     | BP | 8  | 6  | 562 | 70  | 19809 | 1.44E-02 |
| GO:0005782 | peroxisomal matrix                | CC | 8  | 5  | 562 | 51  | 19809 | 1.45E-02 |
| GO:0010043 | response to zinc ion              | BP | 7  | 4  | 562 | 34  | 19809 | 1.52E-02 |
| GO:0098978 | glutamatergic synapse             | CC | 4  | 18 | 562 | 361 | 19809 | 1.53E-02 |
| GO:0051005 | negative regulation of lipoprot   | BP | 9  | 2  | 562 | 7   | 19809 | 1.53E-02 |
| GO:0098821 | BMP receptor activity             | MF | 10 | 2  | 562 | 7   | 19809 | 1.53E-02 |
| GO:0009414 | response to water deprivation     | BP | 5  | 2  | 562 | 7   | 19809 | 1.53E-02 |
| GO:0051798 | positive regulation of hair folli | BP | 8  | 2  | 562 | 7   | 19809 | 1.53E-02 |
| GO:0035425 | autocrine signaling               | BP | 6  | 2  | 562 | 7   | 19809 | 1.53E-02 |
| GO:0005021 | vascular endothelial growth fa    | MF | 10 | 2  | 562 | 7   | 19809 | 1.53E-02 |
| GO:0036016 | cellular response to interleukin  | BP | 8  | 2  | 562 | 7   | 19809 | 1.53E-02 |
| GO:0070852 | cell body fiber                   | CC | 6  | 2  | 562 | 7   | 19809 | 1.53E-02 |
| GO:0045650 | negative regulation of macroph    | BP | 10 | 2  | 562 | 7   | 19809 | 1.53E-02 |
| GO:0005025 | transforming growth factor bet    | MF | 11 | 2  | 562 | 7   | 19809 | 1.53E-02 |
| GO:0008499 | UDP-galactose:beta-N-acetylg      | MF | 8  | 2  | 562 | 7   | 19809 | 1.53E-02 |
| GO:0003223 | ventricular compact myocardit     | BP | 9  | 2  | 562 | 7   | 19809 | 1.53E-02 |
| GO:0006935 | chemotaxis                        | BP | 5  | 10 | 562 | 159 | 19809 | 1.55E-02 |
| GO:0045598 | regulation of fat cell differenti | BP | 7  | 3  | 562 | 19  | 19809 | 1.57E-02 |
| GO:1901741 | positive regulation of myoblas    | BP | 11 | 3  | 562 | 19  | 19809 | 1.57E-02 |
| GO:0097718 | disordered domain specific bin    | MF | 6  | 4  | 562 | 35  | 19809 | 1.67E-02 |
| GO:0055072 | iron ion homeostasis              | BP | 11 | 4  | 562 | 35  | 19809 | 1.67E-02 |
| GO:0051496 | positive regulation of stress fit | BP | 8  | 5  | 562 | 53  | 19809 | 1.69E-02 |
| GO:0007411 | axon guidance                     | BP | 6  | 12 | 562 | 210 | 19809 | 1.71E-02 |
| GO:0030335 | positive regulation of cell migr  | BP | 8  | 13 | 562 | 235 | 19809 | 1.71E-02 |
| GO:0030097 | hemopoiesis                       | BP | 7  | 6  | 562 | 73  | 19809 | 1.74E-02 |
| GO:0043065 | positive regulation of apoptoti   | BP | 9  | 18 | 562 | 367 | 19809 | 1.78E-02 |
| GO:0006807 | nitrogen compound metabolic       | BP | 4  | 3  | 562 | 20  | 19809 | 1.81E-02 |
| GO:0001916 | positive regulation of T cell m   | BP | 8  | 3  | 562 | 20  | 19809 | 1.81E-02 |
| GO:0002063 | chondrocyte development           | BP | 6  | 3  | 562 | 20  | 19809 | 1.81E-02 |
| GO:0004745 | retinol dehydrogenase activity    | MF | 7  | 3  | 562 | 20  | 19809 | 1.81E-02 |
| GO:0032753 | positive regulation of interleuk  | BP | 8  | 3  | 562 | 20  | 19809 | 1.81E-02 |
| GO:0071526 | semaphorin-plexin signaling p     | BP | 6  | 4  | 562 | 36  | 19809 | 1.84E-02 |
| GO:2001240 | negative regulation of extrinsic  | BP | 10 | 4  | 562 | 36  | 19809 | 1.84E-02 |
| GO:0042572 | retinol metabolic process         | BP | 11 | 4  | 562 | 36  | 19809 | 1.84E-02 |
| GO:0005581 | collagen trimer                   | CC | 4  | 7  | 562 | 95  | 19809 | 1.84E-02 |
| GO:0060070 | canonical Wnt signaling pathw     | BP | 8  | 6  | 562 | 74  | 19809 | 1.85E-02 |
| GO:0038023 | signaling receptor activity       | MF | 4  | 13 | 562 | 239 | 19809 | 1.93E-02 |
| GO:0035331 | negative regulation of hippo si   | BP | 10 | 2  | 562 | 8   | 19809 | 2.01E-02 |
| GO:0003183 | mitral valve morphogenesis        | BP | 7  | 2  | 562 | 8   | 19809 | 2.01E-02 |

|            |                                   |    |    |    |     |     |       |          |
|------------|-----------------------------------|----|----|----|-----|-----|-------|----------|
| GO:0002544 | chronic inflammatory response     | BP | 7  | 2  | 562 | 8   | 19809 | 2.01E-02 |
| GO:0032754 | positive regulation of interleuk  | BP | 8  | 2  | 562 | 8   | 19809 | 2.01E-02 |
| GO:0051045 | negative regulation of membra     | BP | 9  | 2  | 562 | 8   | 19809 | 2.01E-02 |
| GO:0032926 | negative regulation of activin r  | BP | 10 | 2  | 562 | 8   | 19809 | 2.01E-02 |
| GO:0001758 | retinal dehydrogenase activity    | MF | 7  | 2  | 562 | 8   | 19809 | 2.01E-02 |
| GO:0032675 | regulation of interleukin-6 pro   | BP | 7  | 2  | 562 | 8   | 19809 | 2.01E-02 |
| GO:0071316 | cellular response to nicotine     | BP | 7  | 2  | 562 | 8   | 19809 | 2.01E-02 |
| GO:0072205 | metanephric collecting duct de    | BP | 7  | 2  | 562 | 8   | 19809 | 2.01E-02 |
| GO:0030219 | megakaryocyte differentiation     | BP | 7  | 2  | 562 | 8   | 19809 | 2.01E-02 |
| GO:0048846 | axon extension involved in axc    | BP | 8  | 2  | 562 | 8   | 19809 | 2.01E-02 |
| GO:0002438 | acute inflammatory response to    | BP | 8  | 2  | 562 | 8   | 19809 | 2.01E-02 |
| GO:0045930 | negative regulation of mitotic c  | BP | 8  | 4  | 562 | 37  | 19809 | 2.02E-02 |
| GO:0001837 | epithelial to mesenchymal tran    | BP | 7  | 4  | 562 | 37  | 19809 | 2.02E-02 |
| GO:0033613 | activating transcription factor l | MF | 7  | 4  | 562 | 37  | 19809 | 2.02E-02 |
| GO:0007160 | cell-matrix adhesion              | BP | 6  | 7  | 562 | 97  | 19809 | 2.04E-02 |
| GO:0030054 | cell junction                     | CC | 3  | 34 | 562 | 829 | 19809 | 2.06E-02 |
| GO:0031012 | extracellular matrix              | CC | 4  | 14 | 562 | 267 | 19809 | 2.07E-02 |
| GO:0005089 | Rho guanyl-nucleotide exchan      | MF | 9  | 6  | 562 | 77  | 19809 | 2.21E-02 |
| GO:0060412 | ventricular septum morphogen      | BP | 6  | 4  | 562 | 38  | 19809 | 2.21E-02 |
| GO:2001237 | negative regulation of extrinsic  | BP | 10 | 4  | 562 | 38  | 19809 | 2.21E-02 |
| GO:0090050 | positive regulation of cell migr  | BP | 12 | 4  | 562 | 38  | 19809 | 2.21E-02 |
| GO:0042177 | negative regulation of protein c  | BP | 8  | 4  | 562 | 38  | 19809 | 2.21E-02 |
| GO:0071222 | cellular response to lipopolysa   | BP | 8  | 10 | 562 | 169 | 19809 | 2.26E-02 |
| GO:0032496 | response to lipopolysaccharide    | BP | 7  | 10 | 562 | 169 | 19809 | 2.26E-02 |
| GO:0005125 | cytokine activity                 | MF | 7  | 12 | 562 | 219 | 19809 | 2.28E-02 |
| GO:0035556 | intracellular signal transductio  | BP | 5  | 21 | 562 | 461 | 19809 | 2.32E-02 |
| GO:0050431 | transforming growth factor bet    | MF | 6  | 3  | 562 | 22  | 19809 | 2.34E-02 |
| GO:0060384 | innervation                       | BP | 4  | 3  | 562 | 22  | 19809 | 2.34E-02 |
| GO:0005667 | transcription factor complex      | CC | 4  | 12 | 562 | 220 | 19809 | 2.36E-02 |
| GO:0043507 | positive regulation of JUN kin    | BP | 13 | 4  | 562 | 39  | 19809 | 2.41E-02 |
| GO:0045429 | positive regulation of nitric ox  | BP | 9  | 4  | 562 | 39  | 19809 | 2.41E-02 |
| GO:0045746 | negative regulation of Notch si   | BP | 9  | 4  | 562 | 39  | 19809 | 2.41E-02 |
| GO:0042475 | odontogenesis of dentin-contai    | BP | 7  | 5  | 562 | 58  | 19809 | 2.41E-02 |
| GO:0035091 | phosphatidylinositol binding      | MF | 6  | 7  | 562 | 101 | 19809 | 2.49E-02 |
| GO:0071243 | cellular response to arsenic-co   | BP | 6  | 2  | 562 | 9   | 19809 | 2.53E-02 |
| GO:0032836 | glomerular basement membrar       | BP | 7  | 2  | 562 | 9   | 19809 | 2.53E-02 |
| GO:0048339 | paraxial mesoderm developme       | BP | 7  | 2  | 562 | 9   | 19809 | 2.53E-02 |
| GO:0071394 | cellular response to testosteror  | BP | 7  | 2  | 562 | 9   | 19809 | 2.53E-02 |
| GO:0044309 | neuron spine                      | CC | 6  | 2  | 562 | 9   | 19809 | 2.53E-02 |
| GO:0044598 | doxorubicin metabolic process     | BP | 6  | 2  | 562 | 9   | 19809 | 2.53E-02 |
| GO:0044597 | daunorubicin metabolic proces     | BP | 6  | 2  | 562 | 9   | 19809 | 2.53E-02 |
| GO:0031232 | extrinsic component of externa    | CC | 6  | 2  | 562 | 9   | 19809 | 2.53E-02 |
| GO:0060982 | coronary artery morphogenesis     | BP | 8  | 2  | 562 | 9   | 19809 | 2.53E-02 |
| GO:0048617 | embryonic foregut morphogen       | BP | 6  | 2  | 562 | 9   | 19809 | 2.53E-02 |
| GO:0070233 | negative regulation of T cell a   | BP | 12 | 2  | 562 | 9   | 19809 | 2.53E-02 |
| GO:0014808 | release of sequestered calcium    | BP | 12 | 2  | 562 | 9   | 19809 | 2.53E-02 |
| GO:0061549 | sympathetic ganglion developr     | BP | 7  | 2  | 562 | 9   | 19809 | 2.53E-02 |
| GO:0003143 | embryonic heart tube morphog      | BP | 6  | 2  | 562 | 9   | 19809 | 2.53E-02 |
| GO:0002020 | protease binding                  | MF | 6  | 7  | 562 | 102 | 19809 | 2.61E-02 |
| GO:0048471 | perinuclear region of cytoplasi   | CC | 6  | 29 | 562 | 697 | 19809 | 2.62E-02 |

|            |                                   |    |    |    |     |     |       |          |
|------------|-----------------------------------|----|----|----|-----|-----|-------|----------|
| GO:0010628 | positive regulation of gene exp   | BP | 8  | 20 | 562 | 439 | 19809 | 2.63E-02 |
| GO:1903589 | positive regulation of blood ve   | BP | 10 | 3  | 562 | 23  | 19809 | 2.64E-02 |
| GO:0005520 | insulin-like growth factor bind   | MF | 6  | 3  | 562 | 23  | 19809 | 2.64E-02 |
| GO:0014032 | neural crest cell development     | BP | 7  | 3  | 562 | 23  | 19809 | 2.64E-02 |
| GO:0006952 | defense response                  | BP | 5  | 9  | 562 | 149 | 19809 | 2.64E-02 |
| GO:0001666 | response to hypoxia               | BP | 5  | 10 | 562 | 174 | 19809 | 2.70E-02 |
| GO:0048661 | positive regulation of smooth r   | BP | 8  | 5  | 562 | 60  | 19809 | 2.75E-02 |
| GO:0071347 | cellular response to interleukin  | BP | 8  | 6  | 562 | 81  | 19809 | 2.75E-02 |
| GO:0098869 | cellular oxidant detoxification   | BP | 5  | 6  | 562 | 81  | 19809 | 2.75E-02 |
| GO:0009953 | dorsal/ventral pattern formatio   | BP | 6  | 4  | 562 | 41  | 19809 | 2.84E-02 |
| GO:1902038 | positive regulation of hematop    | BP | 9  | 1  | 562 | 1   | 19809 | 2.84E-02 |
| GO:0090193 | positive regulation of glomerul   | BP | 8  | 1  | 562 | 1   | 19809 | 2.84E-02 |
| GO:0150018 | basal dendrite development        | BP | 9  | 1  | 562 | 1   | 19809 | 2.84E-02 |
| GO:0051709 | regulation of killing of cells of | BP | 6  | 1  | 562 | 1   | 19809 | 2.84E-02 |
| GO:1904591 | positive regulation of protein i  | BP | 8  | 1  | 562 | 1   | 19809 | 2.84E-02 |
| GO:0043170 | macromolecule metabolic proc      | BP | 5  | 1  | 562 | 1   | 19809 | 2.84E-02 |
| GO:0070230 | positive regulation of lymphoc    | BP | 11 | 1  | 562 | 1   | 19809 | 2.84E-02 |
| GO:0047020 | 15-hydroxyprostaglandin-D de      | MF | 7  | 1  | 562 | 1   | 19809 | 2.84E-02 |
| GO:0090361 | regulation of platelet-derived g  | BP | 7  | 1  | 562 | 1   | 19809 | 2.84E-02 |
| GO:0042628 | mating plug formation             | BP | 6  | 1  | 562 | 1   | 19809 | 2.84E-02 |
| GO:0008470 | isovaleryl-CoA dehydrogenase      | MF | 7  | 1  | 562 | 1   | 19809 | 2.84E-02 |
| GO:0005166 | neurotrophin p75 receptor binc    | MF | 8  | 1  | 562 | 1   | 19809 | 2.84E-02 |
| GO:0052894 | norspermine:oxygen oxidoredu      | MF | 7  | 1  | 562 | 1   | 19809 | 2.84E-02 |
| GO:0035304 | regulation of protein dephosph    | BP | 9  | 1  | 562 | 1   | 19809 | 2.84E-02 |
| GO:0019544 | arginine catabolic process to g   | BP | 13 | 1  | 562 | 1   | 19809 | 2.84E-02 |
| GO:0034516 | response to vitamin B6            | BP | 7  | 1  | 562 | 1   | 19809 | 2.84E-02 |
| GO:0021626 | central nervous system matura     | BP | 6  | 1  | 562 | 1   | 19809 | 2.84E-02 |
| GO:0060301 | positive regulation of cytokine   | BP | 9  | 1  | 562 | 1   | 19809 | 2.84E-02 |
| GO:1900053 | negative regulation of retinoic   | BP | 9  | 1  | 562 | 1   | 19809 | 2.84E-02 |
| GO:0045703 | ketoreductase activity            | MF | 6  | 1  | 562 | 1   | 19809 | 2.84E-02 |
| GO:0061445 | endocardial cushion cell fate c   | BP | 9  | 1  | 562 | 1   | 19809 | 2.84E-02 |
| GO:0038161 | prolactin signaling pathway       | BP | 6  | 1  | 562 | 1   | 19809 | 2.84E-02 |
| GO:0099400 | caveola neck                      | CC | 5  | 1  | 562 | 1   | 19809 | 2.84E-02 |
| GO:0050647 | 5-hydroxy-6E,8Z,11Z,14Z-ico       | MF | 7  | 1  | 562 | 1   | 19809 | 2.84E-02 |
| GO:2000764 | positive regulation of semaphc    | BP | 8  | 1  | 562 | 1   | 19809 | 2.84E-02 |
| GO:0002818 | intracellular defense response    | BP | 7  | 1  | 562 | 1   | 19809 | 2.84E-02 |
| GO:0021683 | cerebellar granular layer morpl   | BP | 5  | 1  | 562 | 1   | 19809 | 2.84E-02 |
| GO:0003837 | beta-ureidopropionase activity    | MF | 7  | 1  | 562 | 1   | 19809 | 2.84E-02 |
| GO:0044195 | nucleoplasmic reticulum           | CC | 6  | 1  | 562 | 1   | 19809 | 2.84E-02 |
| GO:0051867 | general adaptation syndrome, l    | BP | 4  | 1  | 562 | 1   | 19809 | 2.84E-02 |
| GO:0032567 | dGTP binding                      | MF | 9  | 1  | 562 | 1   | 19809 | 2.84E-02 |
| GO:1902891 | negative regulation of root hair  | BP | 8  | 1  | 562 | 1   | 19809 | 2.84E-02 |
| GO:0045751 | negative regulation of Toll sig   | BP | 9  | 1  | 562 | 1   | 19809 | 2.84E-02 |
| GO:0002536 | respiratory burst involved in ir  | BP | 5  | 1  | 562 | 1   | 19809 | 2.84E-02 |
| GO:0019546 | arginine deiminase pathway        | BP | 13 | 1  | 562 | 1   | 19809 | 2.84E-02 |
| GO:0061196 | fungiform papilla developmen      | BP | 5  | 1  | 562 | 1   | 19809 | 2.84E-02 |
| GO:0010900 | negative regulation of phospho    | BP | 8  | 1  | 562 | 1   | 19809 | 2.84E-02 |
| GO:0060658 | nipple morphogenesis              | BP | 5  | 1  | 562 | 1   | 19809 | 2.84E-02 |
| GO:0045977 | positive regulation of mitotic c  | BP | 9  | 1  | 562 | 1   | 19809 | 2.84E-02 |
| GO:0061756 | leukocyte adhesion to vascular    | BP | 7  | 1  | 562 | 1   | 19809 | 2.84E-02 |



|            |                                   |    |    |   |     |   |       |          |
|------------|-----------------------------------|----|----|---|-----|---|-------|----------|
| GO:0010477 | response to sulfur dioxide        | BP | 6  | 1 | 562 | 1 | 19809 | 2.84E-02 |
| GO:0097185 | cellular response to azide        | BP | 7  | 1 | 562 | 1 | 19809 | 2.84E-02 |
| GO:0090594 | inflammatory response to wou      | BP | 7  | 1 | 562 | 1 | 19809 | 2.84E-02 |
| GO:0072141 | renal interstitial fibroblast dev | BP | 6  | 1 | 562 | 1 | 19809 | 2.84E-02 |
| GO:0002067 | glandular epithelial cell differe | BP | 8  | 1 | 562 | 1 | 19809 | 2.84E-02 |
| GO:0001910 | regulation of leukocyte mediat    | BP | 6  | 1 | 562 | 1 | 19809 | 2.84E-02 |
| GO:0032621 | interleukin-18 production         | BP | 5  | 1 | 562 | 1 | 19809 | 2.84E-02 |
| GO:1903841 | cellular response to arsenite(3-  | BP | 7  | 1 | 562 | 1 | 19809 | 2.84E-02 |
| GO:0046722 | lactic acid secretion             | BP | 14 | 1 | 562 | 1 | 19809 | 2.84E-02 |
| GO:0090265 | positive regulation of immune     | BP | 8  | 1 | 562 | 1 | 19809 | 2.84E-02 |
| GO:0045032 | ADP-activated adenosine recej     | MF | 8  | 1 | 562 | 1 | 19809 | 2.84E-02 |
| GO:0006061 | sorbitol biosynthetic process     | BP | 10 | 1 | 562 | 1 | 19809 | 2.84E-02 |
| GO:0016863 | intramolecular oxidoreductase     | MF | 6  | 1 | 562 | 1 | 19809 | 2.84E-02 |
| GO:0060872 | semicircular canal developmer     | BP | 6  | 1 | 562 | 1 | 19809 | 2.84E-02 |
| GO:2000691 | negative regulation of cardiac    | BP | 9  | 1 | 562 | 1 | 19809 | 2.84E-02 |
| GO:0033396 | beta-alanine biosynthetic proce   | BP | 11 | 1 | 562 | 1 | 19809 | 2.84E-02 |
| GO:0031764 | type 1 galanin receptor binding   | MF | 9  | 1 | 562 | 1 | 19809 | 2.84E-02 |
| GO:1904414 | positive regulation of cardiac v  | BP | 7  | 1 | 562 | 1 | 19809 | 2.84E-02 |
| GO:0061767 | negative regulation of lung blo   | BP | 7  | 1 | 562 | 1 | 19809 | 2.84E-02 |
| GO:1902378 | VEGF-activated neuropilin sig     | BP | 10 | 1 | 562 | 1 | 19809 | 2.84E-02 |
| GO:0071820 | N-box binding                     | MF | 11 | 1 | 562 | 1 | 19809 | 2.84E-02 |
| GO:1905430 | cellular response to glycine      | BP | 9  | 1 | 562 | 1 | 19809 | 2.84E-02 |
| GO:2001202 | negative regulation of transfor   | BP | 9  | 1 | 562 | 1 | 19809 | 2.84E-02 |
| GO:0072683 | T cell extravasation              | BP | 6  | 1 | 562 | 1 | 19809 | 2.84E-02 |
| GO:0052047 | interaction with other organism   | BP | 5  | 1 | 562 | 1 | 19809 | 2.84E-02 |
| GO:2000227 | negative regulation of pancreat   | BP | 9  | 1 | 562 | 1 | 19809 | 2.84E-02 |
| GO:0072677 | eosinophil migration              | BP | 7  | 1 | 562 | 1 | 19809 | 2.84E-02 |
| GO:0004919 | interleukin-9 receptor activity   | MF | 7  | 1 | 562 | 1 | 19809 | 2.84E-02 |
| GO:1900044 | regulation of protein K63-link    | BP | 12 | 1 | 562 | 1 | 19809 | 2.84E-02 |
| GO:0052600 | propane-1,3-diamine oxidase a     | MF | 7  | 1 | 562 | 1 | 19809 | 2.84E-02 |
| GO:1905929 | positive regulation of invadop    | BP | 9  | 1 | 562 | 1 | 19809 | 2.84E-02 |
| GO:0097238 | cellular response to methylgly    | BP | 8  | 1 | 562 | 1 | 19809 | 2.84E-02 |
| GO:1903125 | negative regulation of thioredo   | BP | 11 | 1 | 562 | 1 | 19809 | 2.84E-02 |
| GO:0070572 | positive regulation of neuron p   | BP | 12 | 1 | 562 | 1 | 19809 | 2.84E-02 |
| GO:0035716 | chemokine (C-C motif) ligand      | MF | 8  | 1 | 562 | 1 | 19809 | 2.84E-02 |
| GO:0016990 | arginine deiminase activity       | MF | 7  | 1 | 562 | 1 | 19809 | 2.84E-02 |
| GO:0046880 | regulation of follicle-stimulati  | BP | 9  | 1 | 562 | 1 | 19809 | 2.84E-02 |
| GO:0002002 | regulation of angiotensin level   | BP | 6  | 1 | 562 | 1 | 19809 | 2.84E-02 |
| GO:0098902 | regulation of membrane depola     | BP | 7  | 1 | 562 | 1 | 19809 | 2.84E-02 |
| GO:0070678 | preprotein binding                | MF | 5  | 1 | 562 | 1 | 19809 | 2.84E-02 |
| GO:1904620 | cellular response to dimethyl s   | BP | 7  | 1 | 562 | 1 | 19809 | 2.84E-02 |
| GO:1990407 | calcitonin gene-related peptide   | MF | 8  | 1 | 562 | 1 | 19809 | 2.84E-02 |
| GO:0099569 | presynaptic cytoskeleton          | CC | 7  | 1 | 562 | 1 | 19809 | 2.84E-02 |
| GO:0061670 | evoked neurotransmitter secret    | BP | 7  | 1 | 562 | 1 | 19809 | 2.84E-02 |
| GO:0035874 | cellular response to copper ion   | BP | 9  | 1 | 562 | 1 | 19809 | 2.84E-02 |
| GO:0071966 | fungal-type cell wall polysaccl   | BP | 9  | 1 | 562 | 1 | 19809 | 2.84E-02 |
| GO:1905872 | negative regulation of protein l  | BP | 7  | 1 | 562 | 1 | 19809 | 2.84E-02 |
| GO:0043509 | activin A complex                 | CC | 5  | 1 | 562 | 1 | 19809 | 2.84E-02 |
| GO:0016160 | amylase activity                  | MF | 7  | 1 | 562 | 1 | 19809 | 2.84E-02 |
| GO:1903904 | negative regulation of establis   | BP | 10 | 1 | 562 | 1 | 19809 | 2.84E-02 |

|            |                                                        |    |    |   |     |   |       |          |
|------------|--------------------------------------------------------|----|----|---|-----|---|-------|----------|
| GO:0008458 | carnitine O-octanoyltransferase                        | MF | 9  | 1 | 562 | 1 | 19809 | 2.84E-02 |
| GO:0009013 | succinate-semialdehyde dehydrogenase                   | MF | 7  | 1 | 562 | 1 | 19809 | 2.84E-02 |
| GO:0004398 | histidine decarboxylase activity                       | MF | 7  | 1 | 562 | 1 | 19809 | 2.84E-02 |
| GO:0004034 | aldose 1-epimerase activity                            | MF | 7  | 1 | 562 | 1 | 19809 | 2.84E-02 |
| GO:0048264 | determination of ventral identity                      | BP | 7  | 1 | 562 | 1 | 19809 | 2.84E-02 |
| GO:1905875 | negative regulation of postsynaptic transmission       | BP | 9  | 1 | 562 | 1 | 19809 | 2.84E-02 |
| GO:0002578 | negative regulation of antigen presentation            | BP | 7  | 1 | 562 | 1 | 19809 | 2.84E-02 |
| GO:0034592 | synaptic vesicle lumen                                 | CC | 4  | 1 | 562 | 1 | 19809 | 2.84E-02 |
| GO:2000570 | positive regulation of T-helper cell differentiation   | BP | 12 | 1 | 562 | 1 | 19809 | 2.84E-02 |
| GO:0002246 | wound healing involved in inflammation                 | BP | 7  | 1 | 562 | 1 | 19809 | 2.84E-02 |
| GO:0072705 | cellular response to mercaptopyruvate                  | BP | 8  | 1 | 562 | 1 | 19809 | 2.84E-02 |
| GO:1904887 | Wnt signalosome assembly                               | BP | 7  | 1 | 562 | 1 | 19809 | 2.84E-02 |
| GO:0050701 | interleukin-1 secretion                                | BP | 12 | 1 | 562 | 1 | 19809 | 2.84E-02 |
| GO:0002828 | regulation of type 2 immune response                   | BP | 7  | 1 | 562 | 1 | 19809 | 2.84E-02 |
| GO:0002581 | negative regulation of antigen presentation            | BP | 8  | 1 | 562 | 1 | 19809 | 2.84E-02 |
| GO:2000464 | positive regulation of astrocyte differentiation       | BP | 9  | 1 | 562 | 1 | 19809 | 2.84E-02 |
| GO:0090075 | relaxation of muscle                                   | BP | 6  | 1 | 562 | 1 | 19809 | 2.84E-02 |
| GO:0052599 | methylputrescine oxidase activity                      | MF | 7  | 1 | 562 | 1 | 19809 | 2.84E-02 |
| GO:0045186 | zonula adherens assembly                               | BP | 8  | 1 | 562 | 1 | 19809 | 2.84E-02 |
| GO:0048685 | negative regulation of collateral sprouting            | BP | 9  | 1 | 562 | 1 | 19809 | 2.84E-02 |
| GO:2000415 | positive regulation of fibronectin assembly            | BP | 11 | 1 | 562 | 1 | 19809 | 2.84E-02 |
| GO:1990858 | cellular response to lectin                            | BP | 6  | 1 | 562 | 1 | 19809 | 2.84E-02 |
| GO:0003830 | beta-1,4-mannosylglycoproteinase activity              | MF | 8  | 1 | 562 | 1 | 19809 | 2.84E-02 |
| GO:0006848 | pyruvate transport                                     | BP | 11 | 1 | 562 | 1 | 19809 | 2.84E-02 |
| GO:0036131 | prostaglandin D2 11-ketoreductase activity             | MF | 7  | 1 | 562 | 1 | 19809 | 2.84E-02 |
| GO:0061768 | magnesium:sodium antiporter activity                   | MF | 10 | 1 | 562 | 1 | 19809 | 2.84E-02 |
| GO:0061981 | 3-hydroxykynureninase activity                         | MF | 7  | 1 | 562 | 1 | 19809 | 2.84E-02 |
| GO:0150090 | multiple spine synapse organization                    | BP | 7  | 1 | 562 | 1 | 19809 | 2.84E-02 |
| GO:2000763 | positive regulation of transcription                   | BP | 11 | 1 | 562 | 1 | 19809 | 2.84E-02 |
| GO:0052598 | histamine oxidase activity                             | MF | 7  | 1 | 562 | 1 | 19809 | 2.84E-02 |
| GO:0043795 | glyceraldehyde oxidoreductase activity                 | MF | 6  | 1 | 562 | 1 | 19809 | 2.84E-02 |
| GO:0043132 | NAD transport                                          | BP | 9  | 1 | 562 | 1 | 19809 | 2.84E-02 |
| GO:0072010 | glomerular epithelium development                      | BP | 9  | 1 | 562 | 1 | 19809 | 2.84E-02 |
| GO:2001264 | negative regulation of C-C chemokine receptor activity | BP | 8  | 1 | 562 | 1 | 19809 | 2.84E-02 |
| GO:0034369 | plasma lipoprotein particle reuptake                   | BP | 8  | 1 | 562 | 1 | 19809 | 2.84E-02 |
| GO:2000661 | positive regulation of interleukin-10 production       | BP | 10 | 1 | 562 | 1 | 19809 | 2.84E-02 |
| GO:0060825 | fibroblast growth factor receptor signaling            | BP | 9  | 1 | 562 | 1 | 19809 | 2.84E-02 |
| GO:0098542 | defense response to other organisms                    | BP | 6  | 1 | 562 | 1 | 19809 | 2.84E-02 |
| GO:2000451 | positive regulation of CD8-positive T cell activation  | BP | 10 | 1 | 562 | 1 | 19809 | 2.84E-02 |
| GO:0050646 | 5-oxo-6E,8Z,11Z,14Z-icosatetraenoic acid               | MF | 5  | 1 | 562 | 1 | 19809 | 2.84E-02 |
| GO:0004925 | prolactin receptor activity                            | MF | 7  | 1 | 562 | 1 | 19809 | 2.84E-02 |
| GO:0000304 | response to singlet oxygen                             | BP | 7  | 1 | 562 | 1 | 19809 | 2.84E-02 |
| GO:0014835 | myoblast differentiation involvement                   | BP | 7  | 1 | 562 | 1 | 19809 | 2.84E-02 |
| GO:0005147 | oncostatin-M receptor binding                          | MF | 7  | 1 | 562 | 1 | 19809 | 2.84E-02 |
| GO:0061108 | seminal vesicle epithelium development                 | BP | 6  | 1 | 562 | 1 | 19809 | 2.84E-02 |
| GO:0071795 | K11-linked polyubiquitin modification                  | MF | 7  | 1 | 562 | 1 | 19809 | 2.84E-02 |
| GO:0061048 | negative regulation of branchial arch morphogenesis    | BP | 9  | 1 | 562 | 1 | 19809 | 2.84E-02 |
| GO:0061881 | positive regulation of anterograde transport           | BP | 9  | 1 | 562 | 1 | 19809 | 2.84E-02 |
| GO:0031765 | type 2 galanin receptor binding                        | MF | 9  | 1 | 562 | 1 | 19809 | 2.84E-02 |
| GO:0043310 | negative regulation of eosinophil chemotaxis           | BP | 10 | 1 | 562 | 1 | 19809 | 2.84E-02 |

|            |                                  |    |    |   |     |   |       |          |
|------------|----------------------------------|----|----|---|-----|---|-------|----------|
| GO:0036479 | peroxidase inhibitor activity    | MF | 6  | 1 | 562 | 1 | 19809 | 2.84E-02 |
| GO:0016854 | racemase and epimerase activi    | MF | 5  | 1 | 562 | 1 | 19809 | 2.84E-02 |
| GO:0004676 | 3-phosphoinositide-dependent     | MF | 9  | 1 | 562 | 1 | 19809 | 2.84E-02 |
| GO:0071133 | alpha9-beta1 integrin-ADAM8      | CC | 6  | 1 | 562 | 1 | 19809 | 2.84E-02 |
| GO:0005983 | starch catabolic process         | BP | 10 | 1 | 562 | 1 | 19809 | 2.84E-02 |
| GO:0004055 | argininosuccinate synthase act   | MF | 6  | 1 | 562 | 1 | 19809 | 2.84E-02 |
| GO:0030429 | kynureninase activity            | MF | 7  | 1 | 562 | 1 | 19809 | 2.84E-02 |
| GO:0090096 | positive regulation of metanep   | BP | 9  | 1 | 562 | 1 | 19809 | 2.84E-02 |
| GO:0031686 | A1 adenosine receptor binding    | MF | 8  | 1 | 562 | 1 | 19809 | 2.84E-02 |
| GO:0051886 | negative regulation of timing c  | BP | 10 | 1 | 562 | 1 | 19809 | 2.84E-02 |
| GO:0004877 | complement component C3b r       | MF | 7  | 1 | 562 | 1 | 19809 | 2.84E-02 |
| GO:0061837 | neuropeptide processing          | BP | 9  | 1 | 562 | 1 | 19809 | 2.84E-02 |
| GO:2000697 | negative regulation of epitheli  | BP | 9  | 1 | 562 | 1 | 19809 | 2.84E-02 |
| GO:0050712 | negative regulation of interleul | BP | 10 | 1 | 562 | 1 | 19809 | 2.84E-02 |
| GO:2000313 | regulation of fibroblast growth  | BP | 9  | 1 | 562 | 1 | 19809 | 2.84E-02 |
| GO:0052895 | N1-acetylspermine:oxygen oxi     | MF | 7  | 1 | 562 | 1 | 19809 | 2.84E-02 |
| GO:1904237 | positive regulation of substrate | BP | 8  | 1 | 562 | 1 | 19809 | 2.84E-02 |
| GO:0002300 | CD8-positive, alpha-beta intra   | BP | 11 | 1 | 562 | 1 | 19809 | 2.84E-02 |
| GO:0070553 | nicotinic acid receptor activity | MF | 7  | 1 | 562 | 1 | 19809 | 2.84E-02 |
| GO:1990678 | histone H4-K16 deacetylation     | BP | 13 | 1 | 562 | 1 | 19809 | 2.84E-02 |
| GO:0048319 | axial mesoderm morphogenesi      | BP | 7  | 1 | 562 | 1 | 19809 | 2.84E-02 |
| GO:0004587 | ornithine-oxo-acid transamina    | MF | 7  | 1 | 562 | 1 | 19809 | 2.84E-02 |
| GO:2000977 | regulation of forebrain neuron   | BP | 10 | 1 | 562 | 1 | 19809 | 2.84E-02 |
| GO:0052597 | diamine oxidase activity         | MF | 7  | 1 | 562 | 1 | 19809 | 2.84E-02 |
| GO:2000224 | regulation of testosterone bios  | BP | 9  | 1 | 562 | 1 | 19809 | 2.84E-02 |
| GO:0036130 | prostaglandin H2 endoperoxid     | MF | 7  | 1 | 562 | 1 | 19809 | 2.84E-02 |
| GO:1901557 | response to fenofibrate          | BP | 6  | 1 | 562 | 1 | 19809 | 2.84E-02 |
| GO:0060427 | lung connective tissue develop   | BP | 7  | 1 | 562 | 1 | 19809 | 2.84E-02 |
| GO:0000435 | positive regulation of transcrip | BP | 11 | 1 | 562 | 1 | 19809 | 2.84E-02 |
| GO:0016495 | C-X3-C chemokine receptor ac     | MF | 9  | 1 | 562 | 1 | 19809 | 2.84E-02 |
| GO:2001107 | negative regulation of Rho gua   | BP | 9  | 1 | 562 | 1 | 19809 | 2.84E-02 |
| GO:2001031 | positive regulation of cellular  | BP | 10 | 1 | 562 | 1 | 19809 | 2.84E-02 |
| GO:0044546 | NLRP3 inflammasome comple        | BP | 8  | 1 | 562 | 1 | 19809 | 2.84E-02 |
| GO:0071545 | inositol phosphate catabolic pr  | BP | 8  | 1 | 562 | 1 | 19809 | 2.84E-02 |
| GO:0016793 | triphosphoric monoester hydro    | MF | 7  | 1 | 562 | 1 | 19809 | 2.84E-02 |
| GO:0042107 | cytokine metabolic process       | BP | 7  | 1 | 562 | 1 | 19809 | 2.84E-02 |
| GO:0033682 | ATP-dependent 5'-3' DNA/RN       | MF | 12 | 1 | 562 | 1 | 19809 | 2.84E-02 |
| GO:0001770 | establishment of natural killer  | BP | 7  | 1 | 562 | 1 | 19809 | 2.84E-02 |
| GO:0140194 | negative regulation of adenylat  | BP | 10 | 1 | 562 | 1 | 19809 | 2.84E-02 |
| GO:1905040 | otic placode development         | BP | 6  | 1 | 562 | 1 | 19809 | 2.84E-02 |
| GO:0061573 | actin filament bundle retrograc  | BP | 9  | 1 | 562 | 1 | 19809 | 2.84E-02 |
| GO:0047273 | galactosylgalactosylglucosylce   | MF | 8  | 1 | 562 | 1 | 19809 | 2.84E-02 |
| GO:0034739 | histone deacetylase activity (H  | MF | 8  | 1 | 562 | 1 | 19809 | 2.84E-02 |
| GO:0099013 | neuronal dense core vesicle lu   | CC | 5  | 1 | 562 | 1 | 19809 | 2.84E-02 |
| GO:0004092 | carnitine O-acetyltransferase a  | MF | 9  | 1 | 562 | 1 | 19809 | 2.84E-02 |
| GO:0034211 | GTP-dependent protein kinase     | MF | 9  | 1 | 562 | 1 | 19809 | 2.84E-02 |
| GO:0071384 | cellular response to corticoster | BP | 8  | 1 | 562 | 1 | 19809 | 2.84E-02 |
| GO:0031766 | type 3 galanin receptor binding  | MF | 9  | 1 | 562 | 1 | 19809 | 2.84E-02 |
| GO:0004777 | succinate-semialdehyde dehyd     | MF | 7  | 1 | 562 | 1 | 19809 | 2.84E-02 |
| GO:0050648 | 5(S)-hydroxyperoxy-6E,8Z,11      | MF | 7  | 1 | 562 | 1 | 19809 | 2.84E-02 |

|            |                                  |    |    |    |     |     |       |          |
|------------|----------------------------------|----|----|----|-----|-----|-------|----------|
| GO:0023025 | MHC class Ib protein complex     | MF | 6  | 1  | 562 | 1   | 19809 | 2.84E-02 |
| GO:0061163 | endoplasmic reticulum polariz    | BP | 7  | 1  | 562 | 1   | 19809 | 2.84E-02 |
| GO:0010121 | arginine catabolic process to p  | BP | 14 | 1  | 562 | 1   | 19809 | 2.84E-02 |
| GO:0005582 | collagen type XV trimer          | CC | 6  | 1  | 562 | 1   | 19809 | 2.84E-02 |
| GO:0035715 | chemokine (C-C motif) ligand     | MF | 8  | 1  | 562 | 1   | 19809 | 2.84E-02 |
| GO:0030882 | lipid antigen binding            | MF | 5  | 1  | 562 | 1   | 19809 | 2.84E-02 |
| GO:0021998 | neural plate mediolateral regio  | BP | 7  | 1  | 562 | 1   | 19809 | 2.84E-02 |
| GO:0035564 | regulation of kidney size        | BP | 6  | 1  | 562 | 1   | 19809 | 2.84E-02 |
| GO:0035705 | T-helper 17 cell chemotaxis      | BP | 9  | 1  | 562 | 1   | 19809 | 2.84E-02 |
| GO:0031962 | mineralocorticoid receptor bin   | MF | 9  | 1  | 562 | 1   | 19809 | 2.84E-02 |
| GO:1905835 | cellular response to pyrimidine  | BP | 8  | 1  | 562 | 1   | 19809 | 2.84E-02 |
| GO:0072703 | cellular response to methyl me   | BP | 7  | 1  | 562 | 1   | 19809 | 2.84E-02 |
| GO:0032396 | inhibitory MHC class I receptc   | MF | 7  | 1  | 562 | 1   | 19809 | 2.84E-02 |
| GO:0006083 | acetate metabolic process        | BP | 7  | 1  | 562 | 1   | 19809 | 2.84E-02 |
| GO:2001203 | positive regulation of transforr | BP | 9  | 1  | 562 | 1   | 19809 | 2.84E-02 |
| GO:1905285 | fibrous ring of heart morphoge   | BP | 6  | 1  | 562 | 1   | 19809 | 2.84E-02 |
| GO:0008832 | dGTPase activity                 | MF | 8  | 1  | 562 | 1   | 19809 | 2.84E-02 |
| GO:0000053 | argininosuccinate metabolic pr   | BP | 6  | 1  | 562 | 1   | 19809 | 2.84E-02 |
| GO:0060896 | neural plate pattern specificati | BP | 5  | 1  | 562 | 1   | 19809 | 2.84E-02 |
| GO:0046449 | creatinine metabolic process     | BP | 8  | 1  | 562 | 1   | 19809 | 2.84E-02 |
| GO:0061106 | negative regulation of stomach   | BP | 8  | 1  | 562 | 1   | 19809 | 2.84E-02 |
| GO:0001861 | complement component C4b r       | MF | 7  | 1  | 562 | 1   | 19809 | 2.84E-02 |
| GO:0048352 | paraxial mesoderm structural c   | BP | 6  | 1  | 562 | 1   | 19809 | 2.84E-02 |
| GO:0045381 | regulation of interleukin-18 bic | BP | 8  | 1  | 562 | 1   | 19809 | 2.84E-02 |
| GO:1902946 | protein localization to early en | BP | 9  | 1  | 562 | 1   | 19809 | 2.84E-02 |
| GO:0051021 | GDP-dissociation inhibitor bin   | MF | 5  | 1  | 562 | 1   | 19809 | 2.84E-02 |
| GO:0047915 | ganglioside galactosyltransfer   | MF | 8  | 1  | 562 | 1   | 19809 | 2.84E-02 |
| GO:1902498 | regulation of protein autoubiq   | BP | 11 | 1  | 562 | 1   | 19809 | 2.84E-02 |
| GO:0007193 | adenylate cyclase-inhibiting G   | BP | 8  | 5  | 562 | 61  | 19809 | 2.92E-02 |
| GO:0042157 | lipoprotein metabolic process    | BP | 7  | 3  | 562 | 24  | 19809 | 2.95E-02 |
| GO:0045671 | negative regulation of osteocla  | BP | 10 | 3  | 562 | 24  | 19809 | 2.95E-02 |
| GO:0010608 | posttranscriptional regulation c | BP | 8  | 3  | 562 | 24  | 19809 | 2.95E-02 |
| GO:0043236 | laminin binding                  | MF | 5  | 3  | 562 | 24  | 19809 | 2.95E-02 |
| GO:0006693 | prostaglandin metabolic proces   | BP | 10 | 3  | 562 | 24  | 19809 | 2.95E-02 |
| GO:0045089 | positive regulation of innate in | BP | 8  | 3  | 562 | 24  | 19809 | 2.95E-02 |
| GO:0045879 | negative regulation of smoothe   | BP | 9  | 3  | 562 | 24  | 19809 | 2.95E-02 |
| GO:0051092 | positive regulation of NF-kapp   | BP | 7  | 9  | 562 | 152 | 19809 | 2.96E-02 |
| GO:0050776 | regulation of immune response    | BP | 6  | 11 | 562 | 202 | 19809 | 2.97E-02 |
| GO:0001657 | ureteric bud development         | BP | 7  | 4  | 562 | 42  | 19809 | 3.07E-02 |
| GO:0002062 | chondrocyte differentiation      | BP | 6  | 4  | 562 | 42  | 19809 | 3.07E-02 |
| GO:0003690 | double-stranded DNA binding      | MF | 7  | 8  | 562 | 129 | 19809 | 3.08E-02 |
| GO:0045669 | positive regulation of osteobla  | BP | 8  | 5  | 562 | 62  | 19809 | 3.11E-02 |
| GO:0042102 | positive regulation of T cell pr | BP | 11 | 5  | 562 | 62  | 19809 | 3.11E-02 |
| GO:0048762 | mesenchymal cell differentiati   | BP | 6  | 2  | 562 | 10  | 19809 | 3.11E-02 |
| GO:0007567 | parturition                      | BP | 5  | 2  | 562 | 10  | 19809 | 3.11E-02 |
| GO:0006900 | vesicle budding from membrar     | BP | 7  | 2  | 562 | 10  | 19809 | 3.11E-02 |
| GO:0061037 | negative regulation of cartilage | BP | 7  | 2  | 562 | 10  | 19809 | 3.11E-02 |
| GO:0006930 | substrate-dependent cell migra   | BP | 8  | 2  | 562 | 10  | 19809 | 3.11E-02 |
| GO:0042135 | neurotransmitter catabolic proc  | BP | 7  | 2  | 562 | 10  | 19809 | 3.11E-02 |
| GO:0032060 | bleb assembly                    | BP | 8  | 2  | 562 | 10  | 19809 | 3.11E-02 |

|            |                                  |    |    |     |     |      |       |          |
|------------|----------------------------------|----|----|-----|-----|------|-------|----------|
| GO:0003680 | AT DNA binding                   | MF | 9  | 2   | 562 | 10   | 19809 | 3.11E-02 |
| GO:0010467 | gene expression                  | BP | 6  | 2   | 562 | 10   | 19809 | 3.11E-02 |
| GO:0086013 | membrane repolarization durin    | BP | 10 | 2   | 562 | 10   | 19809 | 3.11E-02 |
| GO:0042448 | progesterone metabolic proces    | BP | 8  | 2   | 562 | 10   | 19809 | 3.11E-02 |
| GO:0071287 | cellular response to manganese   | BP | 8  | 2   | 562 | 10   | 19809 | 3.11E-02 |
| GO:0045080 | positive regulation of chemoki   | BP | 9  | 2   | 562 | 10   | 19809 | 3.11E-02 |
| GO:0033089 | positive regulation of T cell di | BP | 11 | 2   | 562 | 10   | 19809 | 3.11E-02 |
| GO:0001843 | neural tube closure              | BP | 7  | 6   | 562 | 84   | 19809 | 3.21E-02 |
| GO:0033993 | response to lipid                | BP | 6  | 3   | 562 | 25   | 19809 | 3.29E-02 |
| GO:0048843 | negative regulation of axon ex   | BP | 9  | 3   | 562 | 25   | 19809 | 3.29E-02 |
| GO:0048844 | artery morphogenesis             | BP | 7  | 3   | 562 | 25   | 19809 | 3.29E-02 |
| GO:0022617 | extracellular matrix disassemb   | BP | 6  | 5   | 562 | 63   | 19809 | 3.30E-02 |
| GO:0002548 | monocyte chemotaxis              | BP | 6  | 4   | 562 | 43   | 19809 | 3.31E-02 |
| GO:0001541 | ovarian follicle development     | BP | 6  | 4   | 562 | 43   | 19809 | 3.31E-02 |
| GO:0008277 | regulation of G protein-couple   | BP | 8  | 4   | 562 | 43   | 19809 | 3.31E-02 |
| GO:0019722 | calcium-mediated signaling       | BP | 7  | 6   | 562 | 85   | 19809 | 3.38E-02 |
| GO:0048010 | vascular endothelial growth fa   | BP | 8  | 5   | 562 | 64   | 19809 | 3.50E-02 |
| GO:0032729 | positive regulation of interfero | BP | 8  | 4   | 562 | 44   | 19809 | 3.56E-02 |
| GO:0042104 | positive regulation of activat   | BP | 12 | 3   | 562 | 26   | 19809 | 3.64E-02 |
| GO:0046697 | decidualization                  | BP | 5  | 3   | 562 | 26   | 19809 | 3.64E-02 |
| GO:0042493 | response to drug                 | BP | 5  | 15  | 562 | 316  | 19809 | 3.68E-02 |
| GO:0006625 | protein targeting to peroxisom   | BP | 12 | 5   | 562 | 65   | 19809 | 3.71E-02 |
| GO:0001664 | G protein-coupled receptor bin   | MF | 6  | 5   | 562 | 65   | 19809 | 3.71E-02 |
| GO:0007169 | transmembrane receptor protei    | BP | 7  | 7   | 562 | 110  | 19809 | 3.72E-02 |
| GO:0034101 | erythrocyte homeostasis          | BP | 5  | 2   | 562 | 11   | 19809 | 3.73E-02 |
| GO:0051246 | regulation of protein metabolic  | BP | 7  | 2   | 562 | 11   | 19809 | 3.73E-02 |
| GO:0001778 | plasma membrane repair           | BP | 7  | 2   | 562 | 11   | 19809 | 3.73E-02 |
| GO:0010918 | positive regulation of mitochoi  | BP | 7  | 2   | 562 | 11   | 19809 | 3.73E-02 |
| GO:0015386 | potassium:proton antiporter ac   | MF | 12 | 2   | 562 | 11   | 19809 | 3.73E-02 |
| GO:0048711 | positive regulation of astrocyte | BP | 12 | 2   | 562 | 11   | 19809 | 3.73E-02 |
| GO:0097242 | amyloid-beta clearance           | BP | 4  | 2   | 562 | 11   | 19809 | 3.73E-02 |
| GO:0097284 | hepatocyte apoptotic process     | BP | 8  | 2   | 562 | 11   | 19809 | 3.73E-02 |
| GO:0000185 | activation of MAPKKK activit     | BP | 13 | 2   | 562 | 11   | 19809 | 3.73E-02 |
| GO:0032731 | positive regulation of interleuk | BP | 9  | 2   | 562 | 11   | 19809 | 3.73E-02 |
| GO:0032204 | regulation of telomere mainten   | BP | 9  | 2   | 562 | 11   | 19809 | 3.73E-02 |
| GO:0048012 | hepatocyte growth factor rece    | BP | 8  | 2   | 562 | 11   | 19809 | 3.73E-02 |
| GO:0032691 | negative regulation of interleu  | BP | 9  | 2   | 562 | 11   | 19809 | 3.73E-02 |
| GO:0086009 | membrane repolarization          | BP | 8  | 2   | 562 | 11   | 19809 | 3.73E-02 |
| GO:0008037 | cell recognition                 | BP | 4  | 2   | 562 | 11   | 19809 | 3.73E-02 |
| GO:0030134 | COPII-coated ER to Golgi tran    | CC | 8  | 4   | 562 | 45   | 19809 | 3.82E-02 |
| GO:0032870 | cellular response to hormone s   | BP | 6  | 4   | 562 | 45   | 19809 | 3.82E-02 |
| GO:0016020 | membrane                         | CC | 3  | 261 | 562 | 8459 | 19809 | 3.83E-02 |
| GO:0014068 | positive regulation of phosphat  | BP | 10 | 6   | 562 | 88   | 19809 | 3.90E-02 |
| GO:0035023 | regulation of Rho protein sign   | BP | 11 | 6   | 562 | 88   | 19809 | 3.90E-02 |
| GO:0001958 | endochondral ossification        | BP | 6  | 3   | 562 | 27   | 19809 | 4.01E-02 |
| GO:0071377 | cellular response to glucagon s  | BP | 8  | 3   | 562 | 27   | 19809 | 4.01E-02 |
| GO:0003148 | outflow tract septum morphog     | BP | 6  | 3   | 562 | 27   | 19809 | 4.01E-02 |
| GO:0001755 | neural crest cell migration      | BP | 8  | 4   | 562 | 46   | 19809 | 4.10E-02 |
| GO:0060021 | roof of mouth development        | BP | 5  | 5   | 562 | 67   | 19809 | 4.14E-02 |
| GO:0007050 | cell cycle arrest                | BP | 5  | 8   | 562 | 138  | 19809 | 4.32E-02 |

|            |                                   |    |    |    |     |     |       |          |
|------------|-----------------------------------|----|----|----|-----|-----|-------|----------|
| GO:0048812 | neuron projection morphogene      | BP | 8  | 5  | 562 | 68  | 19809 | 4.37E-02 |
| GO:0050918 | positive chemotaxis               | BP | 6  | 4  | 562 | 47  | 19809 | 4.38E-02 |
| GO:0071364 | cellular response to epidermal    | BP | 6  | 4  | 562 | 47  | 19809 | 4.38E-02 |
| GO:0030983 | mismatched DNA binding            | MF | 8  | 2  | 562 | 12  | 19809 | 4.39E-02 |
| GO:0032695 | negative regulation of interleu   | BP | 8  | 2  | 562 | 12  | 19809 | 4.39E-02 |
| GO:0030371 | translation repressor activity    | MF | 4  | 2  | 562 | 12  | 19809 | 4.39E-02 |
| GO:2000178 | negative regulation of neural p   | BP | 8  | 2  | 562 | 12  | 19809 | 4.39E-02 |
| GO:0042308 | negative regulation of protein i  | BP | 10 | 2  | 562 | 12  | 19809 | 4.39E-02 |
| GO:0055119 | relaxation of cardiac muscle      | BP | 7  | 2  | 562 | 12  | 19809 | 4.39E-02 |
| GO:0048715 | negative regulation of oligoder   | BP | 12 | 2  | 562 | 12  | 19809 | 4.39E-02 |
| GO:0090331 | negative regulation of platelet   | BP | 10 | 2  | 562 | 12  | 19809 | 4.39E-02 |
| GO:0000002 | mitochondrial genome mainter      | BP | 7  | 2  | 562 | 12  | 19809 | 4.39E-02 |
| GO:0043652 | engulfment of apoptotic cell      | BP | 9  | 2  | 562 | 12  | 19809 | 4.39E-02 |
| GO:0006700 | C21-steroid hormone biosynth      | BP | 8  | 2  | 562 | 12  | 19809 | 4.39E-02 |
| GO:0015385 | sodium:proton antiporter activ    | MF | 12 | 2  | 562 | 12  | 19809 | 4.39E-02 |
| GO:1902287 | semaphorin-plexin signaling p     | BP | 8  | 2  | 562 | 12  | 19809 | 4.39E-02 |
| GO:0010763 | positive regulation of fibroblas  | BP | 9  | 2  | 562 | 12  | 19809 | 4.39E-02 |
| GO:0002003 | angiotensin maturation            | BP | 9  | 2  | 562 | 12  | 19809 | 4.39E-02 |
| GO:0045591 | positive regulation of regulator  | BP | 11 | 2  | 562 | 12  | 19809 | 4.39E-02 |
| GO:0045730 | respiratory burst                 | BP | 4  | 2  | 562 | 12  | 19809 | 4.39E-02 |
| GO:0097028 | dendritic cell differentiation    | BP | 7  | 2  | 562 | 12  | 19809 | 4.39E-02 |
| GO:0051926 | negative regulation of calcium    | BP | 9  | 2  | 562 | 12  | 19809 | 4.39E-02 |
| GO:0090197 | positive regulation of chemoki    | BP | 9  | 2  | 562 | 12  | 19809 | 4.39E-02 |
| GO:0030426 | growth cone                       | CC | 5  | 8  | 562 | 139 | 19809 | 4.48E-02 |
| GO:0044212 | transcription regulatory region   | MF | 7  | 12 | 562 | 244 | 19809 | 4.63E-02 |
| GO:0050890 | cognition                         | BP | 6  | 4  | 562 | 48  | 19809 | 4.68E-02 |
| GO:0051056 | regulation of small GTPase me     | BP | 9  | 8  | 562 | 141 | 19809 | 4.80E-02 |
| GO:0030511 | positive regulation of transfor   | BP | 10 | 3  | 562 | 29  | 19809 | 4.81E-02 |
| GO:2000778 | positive regulation of interleuk  | BP | 9  | 3  | 562 | 29  | 19809 | 4.81E-02 |
| GO:0050715 | positive regulation of cytokine   | BP | 8  | 3  | 562 | 29  | 19809 | 4.81E-02 |
| GO:0002102 | podosome                          | CC | 4  | 3  | 562 | 29  | 19809 | 4.81E-02 |
| GO:0046513 | ceramide biosynthetic process     | BP | 10 | 3  | 562 | 29  | 19809 | 4.81E-02 |
| GO:0048020 | CCR chemokine receptor bind       | MF | 8  | 3  | 562 | 29  | 19809 | 4.81E-02 |
| GO:0005604 | basement membrane                 | CC | 6  | 6  | 562 | 93  | 19809 | 4.89E-02 |
| GO:0050900 | leukocyte migration               | BP | 4  | 10 | 562 | 193 | 19809 | 4.91E-02 |
| GO:0008009 | chemokine activity                | MF | 8  | 4  | 562 | 49  | 19809 | 4.98E-02 |
| GO:0045668 | negative regulation of osteobla   | BP | 8  | 4  | 562 | 49  | 19809 | 4.98E-02 |
| GO:0045599 | negative regulation of fat cell c | BP | 8  | 4  | 562 | 49  | 19809 | 4.98E-02 |
| GO:0016446 | somatic hypermutation of imm      | BP | 6  | 2  | 562 | 13  | 19809 | 5.10E-02 |
| GO:0039706 | co-receptor binding               | MF | 5  | 2  | 562 | 13  | 19809 | 5.10E-02 |
| GO:0060088 | auditory receptor cell stereocil  | BP | 9  | 2  | 562 | 13  | 19809 | 5.10E-02 |
| GO:0001775 | cell activation                   | BP | 4  | 2  | 562 | 13  | 19809 | 5.10E-02 |
| GO:0004032 | alditol:NADP+ 1-oxidoreducte      | MF | 9  | 2  | 562 | 13  | 19809 | 5.10E-02 |
| GO:0004675 | transmembrane receptor protei     | MF | 9  | 2  | 562 | 13  | 19809 | 5.10E-02 |
| GO:0048266 | behavioral response to pain       | BP | 4  | 2  | 562 | 13  | 19809 | 5.10E-02 |
| GO:0008106 | alcohol dehydrogenase (NADf       | MF | 8  | 2  | 562 | 13  | 19809 | 5.10E-02 |
| GO:0050966 | detection of mechanical stimul    | BP | 7  | 2  | 562 | 13  | 19809 | 5.10E-02 |
| GO:0051770 | positive regulation of nitric-ox  | BP | 9  | 2  | 562 | 13  | 19809 | 5.10E-02 |
| GO:0042531 | positive regulation of tyrosine   | BP | 11 | 5  | 562 | 71  | 19809 | 5.10E-02 |
| GO:0071300 | cellular response to retinoic ac  | BP | 7  | 5  | 562 | 71  | 19809 | 5.10E-02 |

|            |                                   |    |    |     |     |       |       |          |
|------------|-----------------------------------|----|----|-----|-----|-------|-------|----------|
| GO:0033209 | tumor necrosis factor-mediatec    | BP | 7  | 7   | 562 | 118   | 19809 | 5.10E-02 |
| GO:0045471 | response to ethanol               | BP | 6  | 7   | 562 | 118   | 19809 | 5.10E-02 |
| GO:0004867 | serine-type endopeptidase inhi    | MF | 8  | 6   | 562 | 94    | 19809 | 5.11E-02 |
| GO:0030334 | regulation of cell migration      | BP | 7  | 6   | 562 | 94    | 19809 | 5.11E-02 |
| GO:0016477 | cell migration                    | BP | 6  | 11  | 562 | 221   | 19809 | 5.12E-02 |
| GO:0007596 | blood coagulation                 | BP | 7  | 10  | 562 | 195   | 19809 | 5.20E-02 |
| GO:0046677 | response to antibiotic            | BP | 5  | 3   | 562 | 30    | 19809 | 5.23E-02 |
| GO:0030669 | clathrin-coated endocytic vesic   | CC | 9  | 3   | 562 | 30    | 19809 | 5.23E-02 |
| GO:0051966 | regulation of synaptic transmis   | BP | 9  | 3   | 562 | 30    | 19809 | 5.23E-02 |
| GO:0051491 | positive regulation of filopodit  | BP | 11 | 3   | 562 | 30    | 19809 | 5.23E-02 |
| GO:0030833 | regulation of actin filament po   | BP | 8  | 3   | 562 | 30    | 19809 | 5.23E-02 |
| GO:0048008 | platelet-derived growth factor :  | BP | 8  | 3   | 562 | 30    | 19809 | 5.23E-02 |
| GO:0046427 | positive regulation of receptor   | BP | 10 | 3   | 562 | 30    | 19809 | 5.23E-02 |
| GO:0051968 | positive regulation of synaptic   | BP | 9  | 3   | 562 | 30    | 19809 | 5.23E-02 |
| GO:0010976 | positive regulation of neuron p   | BP | 11 | 7   | 562 | 119   | 19809 | 5.30E-02 |
| GO:0008630 | intrinsic apoptotic signaling pa  | BP | 7  | 4   | 562 | 50    | 19809 | 5.30E-02 |
| GO:0042060 | wound healing                     | BP | 6  | 6   | 562 | 95    | 19809 | 5.33E-02 |
| GO:0070821 | tertiary granule membrane         | CC | 8  | 5   | 562 | 72    | 19809 | 5.36E-02 |
| GO:0005515 | protein binding                   | MF | 4  | 326 | 562 | 10822 | 19809 | 5.59E-02 |
| GO:0038102 | activin receptor antagonist acti  | MF | 7  | 1   | 562 | 2     | 19809 | 5.59E-02 |
| GO:0030546 | receptor activator activity       | MF | 5  | 1   | 562 | 2     | 19809 | 5.59E-02 |
| GO:0046370 | fructose biosynthetic process     | BP | 9  | 1   | 562 | 2     | 19809 | 5.59E-02 |
| GO:0034669 | integrin alpha4-beta7 complex     | CC | 6  | 1   | 562 | 2     | 19809 | 5.59E-02 |
| GO:0003366 | cell-matrix adhesion involved :   | BP | 7  | 1   | 562 | 2     | 19809 | 5.59E-02 |
| GO:0004699 | calcium-independent protein k     | MF | 10 | 1   | 562 | 2     | 19809 | 5.59E-02 |
| GO:1902499 | positive regulation of protein a  | BP | 12 | 1   | 562 | 2     | 19809 | 5.59E-02 |
| GO:0035669 | TRAM-dependent toll-like rec      | BP | 10 | 1   | 562 | 2     | 19809 | 5.59E-02 |
| GO:0071796 | K6-linked polyubiquitin modif     | MF | 7  | 1   | 562 | 2     | 19809 | 5.59E-02 |
| GO:0045030 | UTP-activated nucleotide rece     | MF | 10 | 1   | 562 | 2     | 19809 | 5.59E-02 |
| GO:0097475 | motor neuron migration            | BP | 8  | 1   | 562 | 2     | 19809 | 5.59E-02 |
| GO:2001183 | negative regulation of interleul  | BP | 9  | 1   | 562 | 2     | 19809 | 5.59E-02 |
| GO:0051153 | regulation of striated muscle c   | BP | 8  | 1   | 562 | 2     | 19809 | 5.59E-02 |
| GO:0034395 | regulation of transcription fron  | BP | 10 | 1   | 562 | 2     | 19809 | 5.59E-02 |
| GO:0035821 | modification of morphology or     | BP | 5  | 1   | 562 | 2     | 19809 | 5.59E-02 |
| GO:1905279 | regulation of retrograde transp   | BP | 7  | 1   | 562 | 2     | 19809 | 5.59E-02 |
| GO:0050975 | sensory perception of touch       | BP | 8  | 1   | 562 | 2     | 19809 | 5.59E-02 |
| GO:0002215 | defense response to nematode      | BP | 7  | 1   | 562 | 2     | 19809 | 5.59E-02 |
| GO:0030832 | regulation of actin filament ler  | BP | 6  | 1   | 562 | 2     | 19809 | 5.59E-02 |
| GO:0034665 | integrin alpha1-beta1 complex     | CC | 6  | 1   | 562 | 2     | 19809 | 5.59E-02 |
| GO:0071242 | cellular response to ammoniun     | BP | 7  | 1   | 562 | 2     | 19809 | 5.59E-02 |
| GO:0021893 | cerebral cortex GABAergic int     | BP | 7  | 1   | 562 | 2     | 19809 | 5.59E-02 |
| GO:0002305 | CD8-positive, gamma-delta int     | BP | 11 | 1   | 562 | 2     | 19809 | 5.59E-02 |
| GO:0070548 | L-glutamine aminotransferase      | MF | 7  | 1   | 562 | 2     | 19809 | 5.59E-02 |
| GO:0021636 | trigeminal nerve morphogenes      | BP | 6  | 1   | 562 | 2     | 19809 | 5.59E-02 |
| GO:1904586 | cellular response to putrescine   | BP | 8  | 1   | 562 | 2     | 19809 | 5.59E-02 |
| GO:0003064 | regulation of heart rate by horr  | BP | 11 | 1   | 562 | 2     | 19809 | 5.59E-02 |
| GO:0070165 | positive regulation of adiponec   | BP | 9  | 1   | 562 | 2     | 19809 | 5.59E-02 |
| GO:0004909 | interleukin-1, type I, activating | MF | 8  | 1   | 562 | 2     | 19809 | 5.59E-02 |
| GO:0032655 | regulation of interleukin-12 pr   | BP | 7  | 1   | 562 | 2     | 19809 | 5.59E-02 |
| GO:0051100 | negative regulation of binding    | BP | 6  | 1   | 562 | 2     | 19809 | 5.59E-02 |

|            |                                   |    |    |   |     |   |       |          |
|------------|-----------------------------------|----|----|---|-----|---|-------|----------|
| GO:1900924 | negative regulation of glycine    | BP | 8  | 1 | 562 | 2 | 19809 | 5.59E-02 |
| GO:0036413 | histone H3-R26 citrullination     | BP | 11 | 1 | 562 | 2 | 19809 | 5.59E-02 |
| GO:0071418 | cellular response to amine stim   | BP | 8  | 1 | 562 | 2 | 19809 | 5.59E-02 |
| GO:0001621 | ADP receptor activity             | MF | 9  | 1 | 562 | 2 | 19809 | 5.59E-02 |
| GO:0072509 | divalent inorganic cation trans   | MF | 8  | 1 | 562 | 2 | 19809 | 5.59E-02 |
| GO:1900248 | negative regulation of cytoplas   | BP | 12 | 1 | 562 | 2 | 19809 | 5.59E-02 |
| GO:2000334 | positive regulation of blood mi   | BP | 7  | 1 | 562 | 2 | 19809 | 5.59E-02 |
| GO:0019442 | tryptophan catabolic process to   | BP | 9  | 1 | 562 | 2 | 19809 | 5.59E-02 |
| GO:0030222 | eosinophil differentiation        | BP | 9  | 1 | 562 | 2 | 19809 | 5.59E-02 |
| GO:0016492 | G protein-coupled neurotensin     | MF | 8  | 1 | 562 | 2 | 19809 | 5.59E-02 |
| GO:1903217 | negative regulation of protein j  | BP | 11 | 1 | 562 | 2 | 19809 | 5.59E-02 |
| GO:0098508 | endothelial to hematopoietic tr   | BP | 8  | 1 | 562 | 2 | 19809 | 5.59E-02 |
| GO:0018931 | naphthalene metabolic process     | BP | 6  | 1 | 562 | 2 | 19809 | 5.59E-02 |
| GO:0051386 | regulation of neurotrophin TRl    | BP | 8  | 1 | 562 | 2 | 19809 | 5.59E-02 |
| GO:0032473 | cytoplasmic side of mitochond     | CC | 5  | 1 | 562 | 2 | 19809 | 5.59E-02 |
| GO:0048378 | regulation of lateral mesoderm    | BP | 10 | 1 | 562 | 2 | 19809 | 5.59E-02 |
| GO:0045844 | positive regulation of striated r | BP | 9  | 1 | 562 | 2 | 19809 | 5.59E-02 |
| GO:0043512 | inhibin A complex                 | CC | 5  | 1 | 562 | 2 | 19809 | 5.59E-02 |
| GO:0003977 | UDP-N-acetylglucosamine dip       | MF | 8  | 1 | 562 | 2 | 19809 | 5.59E-02 |
| GO:0045125 | bioactive lipid receptor activity | MF | 7  | 1 | 562 | 2 | 19809 | 5.59E-02 |
| GO:0045601 | regulation of endothelial cell d  | BP | 8  | 1 | 562 | 2 | 19809 | 5.59E-02 |
| GO:0010623 | programmed cell death involve     | BP | 6  | 1 | 562 | 2 | 19809 | 5.59E-02 |
| GO:0033363 | secretory granule organization    | BP | 7  | 1 | 562 | 2 | 19809 | 5.59E-02 |
| GO:0009756 | carbohydrate mediated signalin    | BP | 5  | 1 | 562 | 2 | 19809 | 5.59E-02 |
| GO:0004392 | heme oxygenase (decyclizing)      | MF | 6  | 1 | 562 | 2 | 19809 | 5.59E-02 |
| GO:0003430 | growth plate cartilage chondro    | BP | 7  | 1 | 562 | 2 | 19809 | 5.59E-02 |
| GO:0004056 | argininosuccinate lyase activit   | MF | 7  | 1 | 562 | 2 | 19809 | 5.59E-02 |
| GO:0035410 | dihydrotestosterone 17-beta-de    | MF | 7  | 1 | 562 | 2 | 19809 | 5.59E-02 |
| GO:0045031 | ATP-activated adenosine rece      | MF | 8  | 1 | 562 | 2 | 19809 | 5.59E-02 |
| GO:0021557 | oculomotor nerve developmen       | BP | 7  | 1 | 562 | 2 | 19809 | 5.59E-02 |
| GO:0018008 | N-terminal peptidyl-glycine N-    | BP | 12 | 1 | 562 | 2 | 19809 | 5.59E-02 |
| GO:0060352 | cell adhesion molecule produc     | BP | 4  | 1 | 562 | 2 | 19809 | 5.59E-02 |
| GO:0072560 | type B pancreatic cell maturati   | BP | 9  | 1 | 562 | 2 | 19809 | 5.59E-02 |
| GO:0110025 | DNA strand resection involve      | BP | 8  | 1 | 562 | 2 | 19809 | 5.59E-02 |
| GO:1904172 | positive regulation of bleb ass   | BP | 10 | 1 | 562 | 2 | 19809 | 5.59E-02 |
| GO:2000017 | positive regulation of determin   | BP | 7  | 1 | 562 | 2 | 19809 | 5.59E-02 |
| GO:0060978 | angiogenesis involved in coror    | BP | 6  | 1 | 562 | 2 | 19809 | 5.59E-02 |
| GO:0035717 | chemokine (C-C motif) ligand      | MF | 8  | 1 | 562 | 2 | 19809 | 5.59E-02 |
| GO:0002876 | positive regulation of chronic i  | BP | 11 | 1 | 562 | 2 | 19809 | 5.59E-02 |
| GO:0047787 | delta4-3-oxosteroid 5beta-redu    | MF | 8  | 1 | 562 | 2 | 19809 | 5.59E-02 |
| GO:0061325 | cell proliferation involved in o  | BP | 5  | 1 | 562 | 2 | 19809 | 5.59E-02 |
| GO:1905521 | regulation of macrophage mig      | BP | 7  | 1 | 562 | 2 | 19809 | 5.59E-02 |
| GO:0099040 | ceramide translocation            | BP | 9  | 1 | 562 | 2 | 19809 | 5.59E-02 |
| GO:0045585 | positive regulation of cytotoxic  | BP | 11 | 1 | 562 | 2 | 19809 | 5.59E-02 |
| GO:0009826 | unidimensional cell growth        | BP | 7  | 1 | 562 | 2 | 19809 | 5.59E-02 |
| GO:0071464 | cellular response to hydrostatic  | BP | 6  | 1 | 562 | 2 | 19809 | 5.59E-02 |
| GO:0001781 | neutrophil apoptotic process      | BP | 8  | 1 | 562 | 2 | 19809 | 5.59E-02 |
| GO:0045029 | UDP-activated nucleotide rece     | MF | 10 | 1 | 562 | 2 | 19809 | 5.59E-02 |
| GO:0002774 | Fc receptor mediated inhibitor    | BP | 8  | 1 | 562 | 2 | 19809 | 5.59E-02 |
| GO:0019483 | beta-alanine biosynthetic proce   | BP | 10 | 1 | 562 | 2 | 19809 | 5.59E-02 |



|            |                                  |    |    |   |     |   |       |          |
|------------|----------------------------------|----|----|---|-----|---|-------|----------|
| GO:0031943 | regulation of glucocorticoid m   | BP | 9  | 1 | 562 | 2 | 19809 | 5.59E-02 |
| GO:1904713 | beta-catenin destruction compl   | MF | 5  | 1 | 562 | 2 | 19809 | 5.59E-02 |
| GO:1905078 | positive regulation of interleuk | BP | 9  | 1 | 562 | 2 | 19809 | 5.59E-02 |
| GO:0110091 | negative regulation of hipposa   | BP | 11 | 1 | 562 | 2 | 19809 | 5.59E-02 |
| GO:0046006 | regulation of activated T cell p | BP | 11 | 1 | 562 | 2 | 19809 | 5.59E-02 |
| GO:0045957 | negative regulation of compler   | BP | 9  | 1 | 562 | 2 | 19809 | 5.59E-02 |
| GO:2000525 | positive regulation of T cell co | BP | 10 | 1 | 562 | 2 | 19809 | 5.59E-02 |
| GO:1990646 | cellular response to prolactin   | BP | 8  | 1 | 562 | 2 | 19809 | 5.59E-02 |
| GO:2000473 | positive regulation of hematop   | BP | 9  | 1 | 562 | 2 | 19809 | 5.59E-02 |
| GO:0071065 | alpha9-beta1 integrin-vascular   | CC | 6  | 1 | 562 | 2 | 19809 | 5.59E-02 |
| GO:1903281 | positive regulation of calcium:  | BP | 9  | 1 | 562 | 2 | 19809 | 5.59E-02 |
| GO:0051606 | detection of stimulus            | BP | 4  | 1 | 562 | 2 | 19809 | 5.59E-02 |
| GO:0007549 | dosage compensation              | BP | 9  | 1 | 562 | 2 | 19809 | 5.59E-02 |
| GO:0021988 | olfactory lobe development       | BP | 5  | 1 | 562 | 2 | 19809 | 5.59E-02 |
| GO:1903538 | regulation of meiotic cell cycle | BP | 8  | 1 | 562 | 2 | 19809 | 5.59E-02 |
| GO:0032986 | protein-DNA complex disassei     | BP | 7  | 1 | 562 | 2 | 19809 | 5.59E-02 |
| GO:1990859 | cellular response to endothelin  | BP | 8  | 1 | 562 | 2 | 19809 | 5.59E-02 |
| GO:0002506 | polysaccharide assembly with     | BP | 8  | 1 | 562 | 2 | 19809 | 5.59E-02 |
| GO:0051119 | sugar transmembrane transport    | MF | 6  | 1 | 562 | 2 | 19809 | 5.59E-02 |
| GO:0004379 | glycylpeptide N-tetradecanoyl    | MF | 8  | 1 | 562 | 2 | 19809 | 5.59E-02 |
| GO:0016155 | formyltetrahydrofolate dehydr    | MF | 7  | 1 | 562 | 2 | 19809 | 5.59E-02 |
| GO:1904017 | cellular response to Thyroglob   | BP | 6  | 1 | 562 | 2 | 19809 | 5.59E-02 |
| GO:0002035 | brain renin-angiotensin system   | BP | 7  | 1 | 562 | 2 | 19809 | 5.59E-02 |
| GO:0030350 | iron-responsive element bindir   | MF | 8  | 1 | 562 | 2 | 19809 | 5.59E-02 |
| GO:0038190 | VEGF-activated neuropilin sig    | BP | 9  | 1 | 562 | 2 | 19809 | 5.59E-02 |
| GO:0051885 | positive regulation of timing o  | BP | 10 | 1 | 562 | 2 | 19809 | 5.59E-02 |
| GO:0070699 | type II activin receptor binding | MF | 9  | 1 | 562 | 2 | 19809 | 5.59E-02 |
| GO:0061928 | glutathione specific gamma-gl    | MF | 7  | 1 | 562 | 2 | 19809 | 5.59E-02 |
| GO:0007525 | somatic muscle development       | BP | 6  | 1 | 562 | 2 | 19809 | 5.59E-02 |
| GO:0045994 | positive regulation of translati | BP | 12 | 1 | 562 | 2 | 19809 | 5.59E-02 |
| GO:0006575 | cellular modified amino acid n   | BP | 5  | 1 | 562 | 2 | 19809 | 5.59E-02 |
| GO:0070667 | negative regulation of mast cel  | BP | 9  | 1 | 562 | 2 | 19809 | 5.59E-02 |
| GO:0032838 | plasma membrane bounded cel      | CC | 7  | 1 | 562 | 2 | 19809 | 5.59E-02 |
| GO:0046331 | lateral inhibition               | BP | 7  | 1 | 562 | 2 | 19809 | 5.59E-02 |
| GO:0004698 | calcium-dependent protein kin    | MF | 10 | 1 | 562 | 2 | 19809 | 5.59E-02 |
| GO:1902336 | positive regulation of retinal g | BP | 12 | 1 | 562 | 2 | 19809 | 5.59E-02 |
| GO:0070052 | collagen V binding               | MF | 6  | 1 | 562 | 2 | 19809 | 5.59E-02 |
| GO:0001855 | complement component C4b b       | MF | 6  | 1 | 562 | 2 | 19809 | 5.59E-02 |
| GO:0033883 | pyridoxal phosphatase activity   | MF | 8  | 1 | 562 | 2 | 19809 | 5.59E-02 |
| GO:0061368 | behavioral response to formali   | BP | 6  | 1 | 562 | 2 | 19809 | 5.59E-02 |
| GO:0051649 | establishment of localization i  | BP | 5  | 1 | 562 | 2 | 19809 | 5.59E-02 |
| GO:0045761 | regulation of adenylate cyclase  | BP | 7  | 1 | 562 | 2 | 19809 | 5.59E-02 |
| GO:1902947 | regulation of tau-protein kinas  | BP | 11 | 1 | 562 | 2 | 19809 | 5.59E-02 |
| GO:0150056 | amylin receptor complex 1        | CC | 9  | 1 | 562 | 2 | 19809 | 5.59E-02 |
| GO:0050754 | positive regulation of fractalki | BP | 10 | 1 | 562 | 2 | 19809 | 5.59E-02 |
| GO:1905664 | regulation of calcium ion impc   | BP | 7  | 1 | 562 | 2 | 19809 | 5.59E-02 |
| GO:0004157 | dihydropyrimidinase activity     | MF | 7  | 1 | 562 | 2 | 19809 | 5.59E-02 |
| GO:0044753 | amphisome                        | CC | 8  | 1 | 562 | 2 | 19809 | 5.59E-02 |
| GO:0001694 | histamine biosynthetic process   | BP | 10 | 1 | 562 | 2 | 19809 | 5.59E-02 |
| GO:0044861 | protein transport into plasma n  | BP | 13 | 1 | 562 | 2 | 19809 | 5.59E-02 |

|            |                                   |    |    |   |     |   |       |          |
|------------|-----------------------------------|----|----|---|-----|---|-------|----------|
| GO:0035332 | positive regulation of hippo sig  | BP | 10 | 1 | 562 | 2 | 19809 | 5.59E-02 |
| GO:0045550 | geranylgeranyl reductase activ    | MF | 5  | 1 | 562 | 2 | 19809 | 5.59E-02 |
| GO:2000412 | positive regulation of thymocy    | BP | 10 | 1 | 562 | 2 | 19809 | 5.59E-02 |
| GO:0021514 | ventral spinal cord interneuron   | BP | 7  | 1 | 562 | 2 | 19809 | 5.59E-02 |
| GO:0006393 | termination of mitochondrial t    | BP | 10 | 1 | 562 | 2 | 19809 | 5.59E-02 |
| GO:0097102 | endothelial tip cell fate specifi | BP | 8  | 1 | 562 | 2 | 19809 | 5.59E-02 |
| GO:0004910 | interleukin-1, type II, blocking  | MF | 8  | 1 | 562 | 2 | 19809 | 5.59E-02 |
| GO:0071378 | cellular response to growth hor   | BP | 8  | 1 | 562 | 2 | 19809 | 5.59E-02 |
| GO:2000309 | positive regulation of tumor ne   | BP | 9  | 1 | 562 | 2 | 19809 | 5.59E-02 |
| GO:0060557 | positive regulation of vitamin j  | BP | 11 | 1 | 562 | 2 | 19809 | 5.59E-02 |
| GO:0030221 | basophil differentiation          | BP | 9  | 1 | 562 | 2 | 19809 | 5.59E-02 |
| GO:2000815 | regulation of mRNA stability i    | BP | 12 | 1 | 562 | 2 | 19809 | 5.59E-02 |
| GO:0016488 | farnesol catabolic process        | BP | 10 | 1 | 562 | 2 | 19809 | 5.59E-02 |
| GO:1990406 | CGRP receptor complex             | CC | 8  | 1 | 562 | 2 | 19809 | 5.59E-02 |
| GO:0008768 | UDP-sugar diphosphatase acti      | MF | 8  | 1 | 562 | 2 | 19809 | 5.59E-02 |
| GO:0061032 | visceral serous pericardium de    | BP | 5  | 1 | 562 | 2 | 19809 | 5.59E-02 |
| GO:0032764 | negative regulation of mast cel   | BP | 9  | 1 | 562 | 2 | 19809 | 5.59E-02 |
| GO:1903929 | primary palate development        | BP | 6  | 1 | 562 | 2 | 19809 | 5.59E-02 |
| GO:0043000 | Golgi to plasma membrane CF       | BP | 11 | 1 | 562 | 2 | 19809 | 5.59E-02 |
| GO:1902023 | L-arginine transport              | BP | 12 | 1 | 562 | 2 | 19809 | 5.59E-02 |
| GO:0035606 | peptidyl-cysteine S-trans-nitro   | BP | 11 | 1 | 562 | 2 | 19809 | 5.59E-02 |
| GO:0060713 | labyrinthine layer morphogene     | BP | 5  | 1 | 562 | 2 | 19809 | 5.59E-02 |
| GO:0042701 | progesterone secretion            | BP | 7  | 1 | 562 | 2 | 19809 | 5.59E-02 |
| GO:0060327 | cytoplasmic actin-based contra    | BP | 7  | 1 | 562 | 2 | 19809 | 5.59E-02 |
| GO:0004917 | interleukin-7 receptor activity   | MF | 7  | 1 | 562 | 2 | 19809 | 5.59E-02 |
| GO:2000981 | negative regulation of inner ea   | BP | 12 | 1 | 562 | 2 | 19809 | 5.59E-02 |
| GO:0046459 | short-chain fatty acid metaboli   | BP | 10 | 1 | 562 | 2 | 19809 | 5.59E-02 |
| GO:0006678 | glucosylceramide metabolic pr     | BP | 11 | 1 | 562 | 2 | 19809 | 5.59E-02 |
| GO:0006681 | galactosylceramide metabolic j    | BP | 11 | 1 | 562 | 2 | 19809 | 5.59E-02 |
| GO:1905006 | negative regulation of epitheli   | BP | 10 | 1 | 562 | 2 | 19809 | 5.59E-02 |
| GO:0048641 | regulation of skeletal muscle ti  | BP | 9  | 1 | 562 | 2 | 19809 | 5.59E-02 |
| GO:0002439 | chronic inflammatory response     | BP | 8  | 1 | 562 | 2 | 19809 | 5.59E-02 |
| GO:0061441 | renal artery morphogenesis        | BP | 8  | 1 | 562 | 2 | 19809 | 5.59E-02 |
| GO:2000418 | positive regulation of eosinopl   | BP | 8  | 1 | 562 | 2 | 19809 | 5.59E-02 |
| GO:2001038 | regulation of cellular response   | BP | 6  | 1 | 562 | 2 | 19809 | 5.59E-02 |
| GO:0006788 | heme oxidation                    | BP | 9  | 1 | 562 | 2 | 19809 | 5.59E-02 |
| GO:0019049 | evasion or tolerance of host de   | BP | 8  | 1 | 562 | 2 | 19809 | 5.59E-02 |
| GO:0001507 | acetylcholine catabolic proces    | BP | 8  | 1 | 562 | 2 | 19809 | 5.59E-02 |
| GO:0070838 | divalent metal ion transport      | BP | 9  | 1 | 562 | 2 | 19809 | 5.59E-02 |
| GO:0046592 | polyamine oxidase activity        | MF | 7  | 1 | 562 | 2 | 19809 | 5.59E-02 |
| GO:0033142 | progesterone receptor binding     | MF | 9  | 1 | 562 | 2 | 19809 | 5.59E-02 |
| GO:0010465 | nerve growth factor receptor a    | MF | 6  | 1 | 562 | 2 | 19809 | 5.59E-02 |
| GO:1904139 | regulation of microglial cell m   | BP | 11 | 1 | 562 | 2 | 19809 | 5.59E-02 |
| GO:0007497 | posterior midgut development      | BP | 5  | 1 | 562 | 2 | 19809 | 5.59E-02 |
| GO:2000978 | negative regulation of forebrai   | BP | 11 | 1 | 562 | 2 | 19809 | 5.59E-02 |
| GO:0010519 | negative regulation of phospho    | BP | 9  | 1 | 562 | 2 | 19809 | 5.59E-02 |
| GO:0071144 | heteromeric SMAD protein co       | CC | 6  | 1 | 562 | 2 | 19809 | 5.59E-02 |
| GO:0002645 | positive regulation of tolerance  | BP | 7  | 1 | 562 | 2 | 19809 | 5.59E-02 |
| GO:0014806 | smooth muscle hyperplasia         | BP | 8  | 1 | 562 | 2 | 19809 | 5.59E-02 |
| GO:0060279 | positive regulation of ovulatio   | BP | 7  | 1 | 562 | 2 | 19809 | 5.59E-02 |

|            |                                  |    |    |    |     |      |       |          |
|------------|----------------------------------|----|----|----|-----|------|-------|----------|
| GO:0021558 | trochlear nerve development      | BP | 7  | 1  | 562 | 2    | 19809 | 5.59E-02 |
| GO:1901534 | positive regulation of hematop   | BP | 8  | 1  | 562 | 2    | 19809 | 5.59E-02 |
| GO:0002276 | basophil activation involved in  | BP | 8  | 1  | 562 | 2    | 19809 | 5.59E-02 |
| GO:0009258 | 10-formyltetrahydrofolate cata   | BP | 10 | 1  | 562 | 2    | 19809 | 5.59E-02 |
| GO:0015207 | adenine transmembrane transp     | MF | 7  | 1  | 562 | 2    | 19809 | 5.59E-02 |
| GO:2000351 | regulation of endothelial cell a | BP | 10 | 1  | 562 | 2    | 19809 | 5.59E-02 |
| GO:0006649 | phospholipid transfer to memb    | BP | 9  | 1  | 562 | 2    | 19809 | 5.59E-02 |
| GO:2000866 | positive regulation of estradiol | BP | 9  | 1  | 562 | 2    | 19809 | 5.59E-02 |
| GO:0097021 | lymphocyte migration into lynr   | BP | 6  | 1  | 562 | 2    | 19809 | 5.59E-02 |
| GO:1902871 | positive regulation of amacrine  | BP | 11 | 1  | 562 | 2    | 19809 | 5.59E-02 |
| GO:0048340 | paraxial mesoderm morphoger      | BP | 7  | 1  | 562 | 2    | 19809 | 5.59E-02 |
| GO:0061459 | L-arginine transmembrane trar    | MF | 9  | 1  | 562 | 2    | 19809 | 5.59E-02 |
| GO:1905289 | regulation of CAMKK-AMPK         | BP | 10 | 1  | 562 | 2    | 19809 | 5.59E-02 |
| GO:0031685 | adenosine receptor binding       | MF | 7  | 1  | 562 | 2    | 19809 | 5.59E-02 |
| GO:0009450 | gamma-aminobutyric acid cata     | BP | 10 | 1  | 562 | 2    | 19809 | 5.59E-02 |
| GO:0014041 | regulation of neuron maturatio   | BP | 10 | 1  | 562 | 2    | 19809 | 5.59E-02 |
| GO:0051799 | negative regulation of hair foll | BP | 8  | 1  | 562 | 2    | 19809 | 5.59E-02 |
| GO:0004482 | mRNA (guanine-N7-)-methylt       | MF | 8  | 1  | 562 | 2    | 19809 | 5.59E-02 |
| GO:0002752 | cell surface pattern recognitior | BP | 8  | 1  | 562 | 2    | 19809 | 5.59E-02 |
| GO:0032127 | dense core granule membrane      | CC | 8  | 1  | 562 | 2    | 19809 | 5.59E-02 |
| GO:0047757 | chondroitin-glucuronate 5-epir   | MF | 7  | 1  | 562 | 2    | 19809 | 5.59E-02 |
| GO:0060049 | regulation of protein glycosyla  | BP | 9  | 1  | 562 | 2    | 19809 | 5.59E-02 |
| GO:1902823 | negative regulation of late end  | BP | 9  | 1  | 562 | 2    | 19809 | 5.59E-02 |
| GO:0006753 | nucleoside phosphate metaboli    | BP | 7  | 1  | 562 | 2    | 19809 | 5.59E-02 |
| GO:0001806 | type IV hypersensitivity         | BP | 8  | 1  | 562 | 2    | 19809 | 5.59E-02 |
| GO:0060302 | negative regulation of cytokine  | BP | 9  | 1  | 562 | 2    | 19809 | 5.59E-02 |
| GO:0016404 | 15-hydroxyprostaglandin dehy     | MF | 7  | 1  | 562 | 2    | 19809 | 5.59E-02 |
| GO:1902608 | positive regulation of large cor | BP | 9  | 1  | 562 | 2    | 19809 | 5.59E-02 |
| GO:1903775 | regulation of DNA double-str     | BP | 11 | 1  | 562 | 2    | 19809 | 5.59E-02 |
| GO:0010559 | regulation of glycoprotein bios  | BP | 8  | 1  | 562 | 2    | 19809 | 5.59E-02 |
| GO:0031533 | mRNA cap methyltransferase       | CC | 6  | 1  | 562 | 2    | 19809 | 5.59E-02 |
| GO:0052901 | spermine:oxygen oxidoreducta     | MF | 7  | 1  | 562 | 2    | 19809 | 5.59E-02 |
| GO:0002537 | nitric oxide production involve  | BP | 5  | 1  | 562 | 2    | 19809 | 5.59E-02 |
| GO:0002767 | immune response-inhibiting ce    | BP | 7  | 1  | 562 | 2    | 19809 | 5.59E-02 |
| GO:1902257 | negative regulation of apoptoti  | BP | 8  | 1  | 562 | 2    | 19809 | 5.59E-02 |
| GO:0046208 | spermine catabolic process       | BP | 11 | 1  | 562 | 2    | 19809 | 5.59E-02 |
| GO:0007186 | G protein-coupled receptor sig   | BP | 5  | 42 | 562 | 1150 | 19809 | 5.62E-02 |
| GO:0005080 | protein kinase C binding         | MF | 8  | 4  | 562 | 51   | 19809 | 5.63E-02 |
| GO:0005901 | caveola                          | CC | 8  | 5  | 562 | 73   | 19809 | 5.63E-02 |
| GO:1902895 | positive regulation of pri-miRl  | BP | 11 | 3  | 562 | 31   | 19809 | 5.68E-02 |
| GO:0002040 | sprouting angiogenesis           | BP | 6  | 3  | 562 | 31   | 19809 | 5.68E-02 |
| GO:0044267 | cellular protein metabolic proc  | BP | 7  | 11 | 562 | 225  | 19809 | 5.68E-02 |
| GO:0000165 | MAPK cascade                     | BP | 11 | 13 | 562 | 280  | 19809 | 5.71E-02 |
| GO:0030324 | lung development                 | BP | 6  | 6  | 562 | 97   | 19809 | 5.78E-02 |
| GO:0042535 | positive regulation of tumor ne  | BP | 10 | 2  | 562 | 14   | 19809 | 5.84E-02 |
| GO:0002675 | positive regulation of acute inf | BP | 10 | 2  | 562 | 14   | 19809 | 5.84E-02 |
| GO:0007398 | ectoderm development             | BP | 6  | 2  | 562 | 14   | 19809 | 5.84E-02 |
| GO:1902902 | negative regulation of autopha   | BP | 11 | 2  | 562 | 14   | 19809 | 5.84E-02 |
| GO:0016242 | negative regulation of macroat   | BP | 10 | 2  | 562 | 14   | 19809 | 5.84E-02 |
| GO:1904645 | response to amyloid-beta         | BP | 8  | 2  | 562 | 14   | 19809 | 5.84E-02 |

|            |                                   |    |    |    |     |      |       |          |
|------------|-----------------------------------|----|----|----|-----|------|-------|----------|
| GO:0071361 | cellular response to ethanol      | BP | 7  | 2  | 562 | 14   | 19809 | 5.84E-02 |
| GO:0044130 | negative regulation of growth c   | BP | 7  | 2  | 562 | 14   | 19809 | 5.84E-02 |
| GO:0061045 | negative regulation of wound h    | BP | 8  | 2  | 562 | 14   | 19809 | 5.84E-02 |
| GO:0005940 | septin ring                       | CC | 8  | 2  | 562 | 14   | 19809 | 5.84E-02 |
| GO:0032740 | positive regulation of interleuk  | BP | 8  | 2  | 562 | 14   | 19809 | 5.84E-02 |
| GO:0051145 | smooth muscle cell differentia    | BP | 7  | 2  | 562 | 14   | 19809 | 5.84E-02 |
| GO:0030194 | positive regulation of blood co   | BP | 8  | 2  | 562 | 14   | 19809 | 5.84E-02 |
| GO:0021675 | nerve development                 | BP | 5  | 2  | 562 | 14   | 19809 | 5.84E-02 |
| GO:0050435 | amyloid-beta metabolic proces     | BP | 8  | 2  | 562 | 14   | 19809 | 5.84E-02 |
| GO:0033630 | positive regulation of cell adhe  | BP | 7  | 2  | 562 | 14   | 19809 | 5.84E-02 |
| GO:0099523 | presynaptic cytosol               | CC | 4  | 2  | 562 | 14   | 19809 | 5.84E-02 |
| GO:0042627 | chylomicron                       | CC | 5  | 2  | 562 | 14   | 19809 | 5.84E-02 |
| GO:0031105 | septin complex                    | CC | 4  | 2  | 562 | 14   | 19809 | 5.84E-02 |
| GO:0045947 | negative regulation of translati  | BP | 11 | 2  | 562 | 14   | 19809 | 5.84E-02 |
| GO:0048185 | activin binding                   | MF | 5  | 2  | 562 | 14   | 19809 | 5.84E-02 |
| GO:0050804 | modulation of chemical synapt     | BP | 8  | 5  | 562 | 74   | 19809 | 5.90E-02 |
| GO:0010466 | negative regulation of peptidas   | BP | 10 | 7  | 562 | 122  | 19809 | 5.90E-02 |
| GO:0006968 | cellular defense response         | BP | 6  | 4  | 562 | 52   | 19809 | 5.96E-02 |
| GO:0000977 | RNA polymerase II regulatory      | MF | 9  | 14 | 562 | 310  | 19809 | 5.97E-02 |
| GO:0048545 | response to steroid hormone       | BP | 6  | 3  | 562 | 32   | 19809 | 6.14E-02 |
| GO:0007631 | feeding behavior                  | BP | 4  | 3  | 562 | 32   | 19809 | 6.14E-02 |
| GO:0005834 | heterotrimeric G-protein comp     | CC | 5  | 3  | 562 | 32   | 19809 | 6.14E-02 |
| GO:0030316 | osteoclast differentiation        | BP | 8  | 3  | 562 | 32   | 19809 | 6.14E-02 |
| GO:0090102 | cochlea development               | BP | 5  | 3  | 562 | 32   | 19809 | 6.14E-02 |
| GO:0001974 | blood vessel remodeling           | BP | 5  | 3  | 562 | 32   | 19809 | 6.14E-02 |
| GO:1900745 | positive regulation of p38MAI     | BP | 13 | 3  | 562 | 32   | 19809 | 6.14E-02 |
| GO:0060325 | face morphogenesis                | BP | 5  | 3  | 562 | 32   | 19809 | 6.14E-02 |
| GO:0004888 | transmembrane signaling recep     | MF | 5  | 11 | 562 | 229  | 19809 | 6.28E-02 |
| GO:0099061 | integral component of postsyn:    | CC | 6  | 4  | 562 | 53   | 19809 | 6.31E-02 |
| GO:0031397 | negative regulation of protein i  | BP | 11 | 4  | 562 | 53   | 19809 | 6.31E-02 |
| GO:1904813 | ficolin-1-rich granule lumen      | CC | 7  | 7  | 562 | 124  | 19809 | 6.33E-02 |
| GO:0030175 | filopodium                        | CC | 7  | 5  | 562 | 76   | 19809 | 6.47E-02 |
| GO:0045944 | positive regulation of transcrip  | BP | 10 | 41 | 562 | 1133 | 19809 | 6.56E-02 |
| GO:0070848 | response to growth factor         | BP | 6  | 2  | 562 | 15   | 19809 | 6.61E-02 |
| GO:0070742 | C2H2 zinc finger domain bind      | MF | 6  | 2  | 562 | 15   | 19809 | 6.61E-02 |
| GO:0031643 | positive regulation of myelinat   | BP | 7  | 2  | 562 | 15   | 19809 | 6.61E-02 |
| GO:0007512 | adult heart development           | BP | 7  | 2  | 562 | 15   | 19809 | 6.61E-02 |
| GO:0002526 | acute inflammatory response       | BP | 7  | 2  | 562 | 15   | 19809 | 6.61E-02 |
| GO:0022408 | negative regulation of cell-cell  | BP | 7  | 2  | 562 | 15   | 19809 | 6.61E-02 |
| GO:2000573 | positive regulation of DNA bic    | BP | 9  | 2  | 562 | 15   | 19809 | 6.61E-02 |
| GO:0098719 | sodium ion import across plastr   | BP | 11 | 2  | 562 | 15   | 19809 | 6.61E-02 |
| GO:0005024 | transforming growth factor bet    | MF | 10 | 2  | 562 | 15   | 19809 | 6.61E-02 |
| GO:0000900 | translation repressor activity, r | MF | 5  | 2  | 562 | 15   | 19809 | 6.61E-02 |
| GO:0050678 | regulation of epithelial cell prc | BP | 7  | 2  | 562 | 15   | 19809 | 6.61E-02 |
| GO:0045618 | positive regulation of keratinoc  | BP | 10 | 2  | 562 | 15   | 19809 | 6.61E-02 |
| GO:0050965 | detection of temperature stimu    | BP | 8  | 2  | 562 | 15   | 19809 | 6.61E-02 |
| GO:0004697 | protein kinase C activity         | MF | 9  | 2  | 562 | 15   | 19809 | 6.61E-02 |
| GO:0070207 | protein homotrimerization         | BP | 9  | 3  | 562 | 33   | 19809 | 6.61E-02 |
| GO:0097421 | liver regeneration                | BP | 8  | 3  | 562 | 33   | 19809 | 6.61E-02 |
| GO:0071549 | cellular response to dexametha    | BP | 7  | 3  | 562 | 33   | 19809 | 6.61E-02 |

|            |                                         |    |    |    |     |      |       |          |
|------------|-----------------------------------------|----|----|----|-----|------|-------|----------|
| GO:0043014 | alpha-tubulin binding                   | MF | 7  | 3  | 562 | 33   | 19809 | 6.61E-02 |
| GO:0003151 | outflow tract morphogenesis             | BP | 5  | 4  | 562 | 54   | 19809 | 6.67E-02 |
| GO:0016324 | apical plasma membrane                  | CC | 5  | 14 | 562 | 316  | 19809 | 6.77E-02 |
| GO:0006486 | protein glycosylation                   | BP | 9  | 9  | 562 | 178  | 19809 | 6.77E-02 |
| GO:0000139 | Golgi membrane                          | CC | 7  | 25 | 562 | 643  | 19809 | 7.03E-02 |
| GO:0007599 | hemostasis                              | BP | 6  | 4  | 562 | 55   | 19809 | 7.04E-02 |
| GO:0071230 | cellular response to amino acid         | BP | 7  | 4  | 562 | 55   | 19809 | 7.04E-02 |
| GO:0030170 | pyridoxal phosphate binding             | MF | 6  | 4  | 562 | 55   | 19809 | 7.04E-02 |
| GO:0042100 | B cell proliferation                    | BP | 8  | 3  | 562 | 34   | 19809 | 7.11E-02 |
| GO:0031663 | lipopolysaccharide-mediated signaling   | BP | 6  | 3  | 562 | 34   | 19809 | 7.11E-02 |
| GO:2000352 | negative regulation of endothelial cell | BP | 11 | 3  | 562 | 34   | 19809 | 7.11E-02 |
| GO:0045773 | positive regulation of axon extension   | BP | 8  | 3  | 562 | 34   | 19809 | 7.11E-02 |
| GO:0005794 | Golgi apparatus                         | CC | 6  | 46 | 562 | 1300 | 19809 | 7.16E-02 |
| GO:0006874 | cellular calcium ion homeostasis        | BP | 11 | 6  | 562 | 103  | 19809 | 7.29E-02 |
| GO:0004222 | metalloendopeptidase activity           | MF | 8  | 6  | 562 | 103  | 19809 | 7.29E-02 |
| GO:1904469 | positive regulation of tumor necrosis   | BP | 10 | 2  | 562 | 16   | 19809 | 7.42E-02 |
| GO:0045778 | positive regulation of ossification     | BP | 7  | 2  | 562 | 16   | 19809 | 7.42E-02 |
| GO:2000679 | positive regulation of transcription    | BP | 8  | 2  | 562 | 16   | 19809 | 7.42E-02 |
| GO:0035729 | cellular response to hepatocyte growth  | BP | 8  | 2  | 562 | 16   | 19809 | 7.42E-02 |
| GO:0034116 | positive regulation of heterotypic cell | BP | 8  | 2  | 562 | 16   | 19809 | 7.42E-02 |
| GO:0008191 | metalloendopeptidase inhibitor          | MF | 8  | 2  | 562 | 16   | 19809 | 7.42E-02 |
| GO:0023026 | MHC class II protein complex            | MF | 6  | 2  | 562 | 16   | 19809 | 7.42E-02 |
| GO:0061028 | establishment of endothelial barrier    | BP | 8  | 2  | 562 | 16   | 19809 | 7.42E-02 |
| GO:0007342 | fusion of sperm to egg plasma           | BP | 5  | 2  | 562 | 16   | 19809 | 7.42E-02 |
| GO:0006309 | apoptotic DNA fragmentation             | BP | 10 | 2  | 562 | 16   | 19809 | 7.42E-02 |
| GO:0048489 | synaptic vesicle transport              | BP | 6  | 2  | 562 | 16   | 19809 | 7.42E-02 |
| GO:1990869 | cellular response to chemokine          | BP | 8  | 2  | 562 | 16   | 19809 | 7.42E-02 |
| GO:0030169 | low-density lipoprotein particle        | MF | 7  | 2  | 562 | 16   | 19809 | 7.42E-02 |
| GO:0045910 | negative regulation of DNA replication  | BP | 10 | 2  | 562 | 16   | 19809 | 7.42E-02 |
| GO:0043525 | positive regulation of neuron apoptosis | BP | 10 | 4  | 562 | 56   | 19809 | 7.42E-02 |
| GO:0031532 | actin cytoskeleton reorganization       | BP | 8  | 4  | 562 | 56   | 19809 | 7.42E-02 |
| GO:0007189 | adenylate cyclase-activating G protein  | BP | 8  | 6  | 562 | 104  | 19809 | 7.56E-02 |
| GO:0007179 | transforming growth factor beta         | BP | 8  | 6  | 562 | 104  | 19809 | 7.56E-02 |
| GO:0050919 | negative chemotaxis                     | BP | 6  | 3  | 562 | 35   | 19809 | 7.62E-02 |
| GO:0060349 | bone morphogenesis                      | BP | 6  | 3  | 562 | 35   | 19809 | 7.62E-02 |
| GO:0015026 | coreceptor activity                     | MF | 5  | 3  | 562 | 35   | 19809 | 7.62E-02 |
| GO:1902042 | negative regulation of extrinsic        | BP | 11 | 3  | 562 | 35   | 19809 | 7.62E-02 |
| GO:0043209 | myelin sheath                           | CC | 4  | 3  | 562 | 35   | 19809 | 7.62E-02 |
| GO:0030901 | midbrain development                    | BP | 5  | 3  | 562 | 35   | 19809 | 7.62E-02 |
| GO:0006812 | cation transport                        | BP | 7  | 5  | 562 | 80   | 19809 | 7.70E-02 |
| GO:0006979 | response to oxidative stress            | BP | 5  | 7  | 562 | 130  | 19809 | 7.72E-02 |
| GO:0016266 | O-glycan processing                     | BP | 11 | 4  | 562 | 57   | 19809 | 7.81E-02 |
| GO:0001503 | ossification                            | BP | 4  | 6  | 562 | 105  | 19809 | 7.84E-02 |
| GO:0005912 | adherens junction                       | CC | 5  | 5  | 562 | 81   | 19809 | 8.02E-02 |
| GO:0097110 | scaffold protein binding                | MF | 5  | 4  | 562 | 58   | 19809 | 8.21E-02 |
| GO:0042733 | embryonic digit morphogenesis           | BP | 6  | 4  | 562 | 58   | 19809 | 8.21E-02 |
| GO:0007200 | phospholipase C-activating G protein    | BP | 6  | 4  | 562 | 58   | 19809 | 8.21E-02 |
| GO:0071380 | cellular response to prostaglandin      | BP | 8  | 2  | 562 | 17   | 19809 | 8.25E-02 |
| GO:0043032 | positive regulation of macrophage       | BP | 8  | 2  | 562 | 17   | 19809 | 8.25E-02 |
| GO:0046965 | retinoid X receptor binding             | MF | 9  | 2  | 562 | 17   | 19809 | 8.25E-02 |

|            |                                   |    |    |   |     |    |       |          |
|------------|-----------------------------------|----|----|---|-----|----|-------|----------|
| GO:0001655 | urogenital system developmen      | BP | 6  | 2 | 562 | 17 | 19809 | 8.25E-02 |
| GO:2000010 | positive regulation of protein l  | BP | 7  | 2 | 562 | 17 | 19809 | 8.25E-02 |
| GO:0014002 | astrocyte development             | BP | 7  | 2 | 562 | 17 | 19809 | 8.25E-02 |
| GO:0016010 | dystrophin-associated glycoprc    | CC | 5  | 2 | 562 | 17 | 19809 | 8.25E-02 |
| GO:0006044 | N-acetylglucosamine metaboli      | BP | 8  | 2 | 562 | 17 | 19809 | 8.25E-02 |
| GO:0008209 | androgen metabolic process        | BP | 7  | 2 | 562 | 17 | 19809 | 8.25E-02 |
| GO:0097038 | perinuclear endoplasmic reticu    | CC | 7  | 2 | 562 | 17 | 19809 | 8.25E-02 |
| GO:0046688 | response to copper ion            | BP | 7  | 2 | 562 | 17 | 19809 | 8.25E-02 |
| GO:0042326 | negative regulation of phosphc    | BP | 10 | 2 | 562 | 17 | 19809 | 8.25E-02 |
| GO:0046325 | negative regulation of glucose    | BP | 10 | 2 | 562 | 17 | 19809 | 8.25E-02 |
| GO:0048747 | muscle fiber development          | BP | 8  | 2 | 562 | 17 | 19809 | 8.25E-02 |
| GO:0030225 | macrophage differentiation        | BP | 8  | 2 | 562 | 17 | 19809 | 8.25E-02 |
| GO:1903980 | positive regulation of microgli   | BP | 9  | 2 | 562 | 17 | 19809 | 8.25E-02 |
| GO:0015299 | solute:proton antiporter activit  | MF | 10 | 2 | 562 | 17 | 19809 | 8.25E-02 |
| GO:0051284 | positive regulation of sequeste   | BP | 7  | 1 | 562 | 3  | 19809 | 8.27E-02 |
| GO:0002291 | T cell activation via T cell rec  | BP | 9  | 1 | 562 | 3  | 19809 | 8.27E-02 |
| GO:1903352 | L-ornithine transmembrane tra     | BP | 8  | 1 | 562 | 3  | 19809 | 8.27E-02 |
| GO:0072061 | inner medullary collecting duc    | BP | 7  | 1 | 562 | 3  | 19809 | 8.27E-02 |
| GO:0033007 | negative regulation of mast cel   | BP | 8  | 1 | 562 | 3  | 19809 | 8.27E-02 |
| GO:0071475 | cellular hyperosmotic salinity    | BP | 8  | 1 | 562 | 3  | 19809 | 8.27E-02 |
| GO:0071626 | mastication                       | BP | 6  | 1 | 562 | 3  | 19809 | 8.27E-02 |
| GO:0038189 | neuropilin signaling pathway      | BP | 6  | 1 | 562 | 3  | 19809 | 8.27E-02 |
| GO:0048017 | inositol lipid-mediated signalir  | BP | 6  | 1 | 562 | 3  | 19809 | 8.27E-02 |
| GO:0045077 | negative regulation of interfer   | BP | 9  | 1 | 562 | 3  | 19809 | 8.27E-02 |
| GO:0046885 | regulation of hormone biosynt     | BP | 8  | 1 | 562 | 3  | 19809 | 8.27E-02 |
| GO:0048841 | regulation of axon extension ir   | BP | 8  | 1 | 562 | 3  | 19809 | 8.27E-02 |
| GO:2001247 | positive regulation of phosphat   | BP | 8  | 1 | 562 | 3  | 19809 | 8.27E-02 |
| GO:0042668 | auditory receptor cell fate dete  | BP | 7  | 1 | 562 | 3  | 19809 | 8.27E-02 |
| GO:2000439 | positive regulation of monocy     | BP | 9  | 1 | 562 | 3  | 19809 | 8.27E-02 |
| GO:0000710 | meiotic mismatch repair           | BP | 10 | 1 | 562 | 3  | 19809 | 8.27E-02 |
| GO:1901857 | positive regulation of cellular   | BP | 8  | 1 | 562 | 3  | 19809 | 8.27E-02 |
| GO:0021773 | striatal medium spiny neuron c    | BP | 9  | 1 | 562 | 3  | 19809 | 8.27E-02 |
| GO:0044346 | fibroblast apoptotic process      | BP | 7  | 1 | 562 | 3  | 19809 | 8.27E-02 |
| GO:0005010 | insulin-like growth factor-activ  | MF | 10 | 1 | 562 | 3  | 19809 | 8.27E-02 |
| GO:1990752 | microtubule end                   | CC | 6  | 1 | 562 | 3  | 19809 | 8.27E-02 |
| GO:0038172 | interleukin-33-mediated signal    | BP | 7  | 1 | 562 | 3  | 19809 | 8.27E-02 |
| GO:0004013 | adenosylhomocysteinase activi     | MF | 7  | 1 | 562 | 3  | 19809 | 8.27E-02 |
| GO:1903765 | negative regulation of potassiu   | BP | 12 | 1 | 562 | 3  | 19809 | 8.27E-02 |
| GO:0000822 | inositol hexakisphosphate bin     | MF | 5  | 1 | 562 | 3  | 19809 | 8.27E-02 |
| GO:0021553 | olfactory nerve development       | BP | 7  | 1 | 562 | 3  | 19809 | 8.27E-02 |
| GO:0001838 | embryonic epithelial tube form    | BP | 7  | 1 | 562 | 3  | 19809 | 8.27E-02 |
| GO:0042984 | regulation of amyloid precurs     | BP | 9  | 1 | 562 | 3  | 19809 | 8.27E-02 |
| GO:0046103 | inosine biosynthetic process      | BP | 12 | 1 | 562 | 3  | 19809 | 8.27E-02 |
| GO:0010693 | negative regulation of alkaline   | BP | 12 | 1 | 562 | 3  | 19809 | 8.27E-02 |
| GO:0071283 | cellular response to iron(III) io | BP | 9  | 1 | 562 | 3  | 19809 | 8.27E-02 |
| GO:1903679 | positive regulation of cap-inde   | BP | 13 | 1 | 562 | 3  | 19809 | 8.27E-02 |
| GO:0060672 | epithelial cell morphogenesis i   | BP | 5  | 1 | 562 | 3  | 19809 | 8.27E-02 |
| GO:0071400 | cellular response to oleic acid   | BP | 8  | 1 | 562 | 3  | 19809 | 8.27E-02 |
| GO:1902937 | inward rectifier potassium cha    | CC | 10 | 1 | 562 | 3  | 19809 | 8.27E-02 |
| GO:1904373 | response to kainic acid           | BP | 7  | 1 | 562 | 3  | 19809 | 8.27E-02 |

|            |                                   |    |    |   |     |   |       |          |
|------------|-----------------------------------|----|----|---|-----|---|-------|----------|
| GO:0005128 | erythropoietin receptor binding   | MF | 7  | 1 | 562 | 3 | 19809 | 8.27E-02 |
| GO:0032450 | maltose alpha-glucosidase acti    | MF | 9  | 1 | 562 | 3 | 19809 | 8.27E-02 |
| GO:2001027 | negative regulation of endothe    | BP | 11 | 1 | 562 | 3 | 19809 | 8.27E-02 |
| GO:0051033 | RNA transmembrane transport       | MF | 7  | 1 | 562 | 3 | 19809 | 8.27E-02 |
| GO:1902692 | regulation of neuroblast prolif   | BP | 9  | 1 | 562 | 3 | 19809 | 8.27E-02 |
| GO:0060675 | ureteric bud morphogenesis        | BP | 11 | 1 | 562 | 3 | 19809 | 8.27E-02 |
| GO:0045023 | G0 to G1 transition               | BP | 5  | 1 | 562 | 3 | 19809 | 8.27E-02 |
| GO:0045619 | regulation of lymphocyte diffe    | BP | 8  | 1 | 562 | 3 | 19809 | 8.27E-02 |
| GO:1904761 | negative regulation of myofibr    | BP | 8  | 1 | 562 | 3 | 19809 | 8.27E-02 |
| GO:0019471 | 4-hydroxyproline metabolic pr     | BP | 6  | 1 | 562 | 3 | 19809 | 8.27E-02 |
| GO:0048101 | calcium- and calmodulin-regul     | MF | 11 | 1 | 562 | 3 | 19809 | 8.27E-02 |
| GO:2001258 | negative regulation of cation c   | BP | 8  | 1 | 562 | 3 | 19809 | 8.27E-02 |
| GO:0002068 | glandular epithelial cell develc  | BP | 8  | 1 | 562 | 3 | 19809 | 8.27E-02 |
| GO:2001204 | regulation of osteoclast develo   | BP | 10 | 1 | 562 | 3 | 19809 | 8.27E-02 |
| GO:0097487 | multivesicular body, internal v   | CC | 7  | 1 | 562 | 3 | 19809 | 8.27E-02 |
| GO:0046061 | dATP catabolic process            | BP | 12 | 1 | 562 | 3 | 19809 | 8.27E-02 |
| GO:0005944 | phosphatidylinositol 3-kinase c   | CC | 9  | 1 | 562 | 3 | 19809 | 8.27E-02 |
| GO:0060164 | regulation of timing of neuron    | BP | 10 | 1 | 562 | 3 | 19809 | 8.27E-02 |
| GO:0019482 | beta-alanine metabolic process    | BP | 9  | 1 | 562 | 3 | 19809 | 8.27E-02 |
| GO:0051654 | establishment of mitochondrio     | BP | 7  | 1 | 562 | 3 | 19809 | 8.27E-02 |
| GO:0045058 | T cell selection                  | BP | 4  | 1 | 562 | 3 | 19809 | 8.27E-02 |
| GO:0098900 | regulation of action potential    | BP | 6  | 1 | 562 | 3 | 19809 | 8.27E-02 |
| GO:0002408 | myeloid dendritic cell chemota    | BP | 7  | 1 | 562 | 3 | 19809 | 8.27E-02 |
| GO:1905747 | negative regulation of saliva se  | BP | 9  | 1 | 562 | 3 | 19809 | 8.27E-02 |
| GO:1904999 | positive regulation of leukocyt   | BP | 10 | 1 | 562 | 3 | 19809 | 8.27E-02 |
| GO:2000172 | regulation of branching morph     | BP | 8  | 1 | 562 | 3 | 19809 | 8.27E-02 |
| GO:0032929 | negative regulation of superox    | BP | 10 | 1 | 562 | 3 | 19809 | 8.27E-02 |
| GO:2000078 | positive regulation of type B p   | BP | 9  | 1 | 562 | 3 | 19809 | 8.27E-02 |
| GO:0047844 | deoxycytidine deaminase activ     | MF | 7  | 1 | 562 | 3 | 19809 | 8.27E-02 |
| GO:0004912 | interleukin-3 receptor activity   | MF | 7  | 1 | 562 | 3 | 19809 | 8.27E-02 |
| GO:0050955 | thermoception                     | BP | 8  | 1 | 562 | 3 | 19809 | 8.27E-02 |
| GO:0061092 | positive regulation of phospho    | BP | 8  | 1 | 562 | 3 | 19809 | 8.27E-02 |
| GO:0042625 | ATPase coupled ion transmem       | MF | 6  | 1 | 562 | 3 | 19809 | 8.27E-02 |
| GO:1904928 | coreceptor activity involved in   | MF | 7  | 1 | 562 | 3 | 19809 | 8.27E-02 |
| GO:0044308 | axonal spine                      | CC | 6  | 1 | 562 | 3 | 19809 | 8.27E-02 |
| GO:0003383 | apical constriction               | BP | 7  | 1 | 562 | 3 | 19809 | 8.27E-02 |
| GO:1902803 | regulation of synaptic vesicle t  | BP | 7  | 1 | 562 | 3 | 19809 | 8.27E-02 |
| GO:0030859 | polarized epithelial cell differe | BP | 7  | 1 | 562 | 3 | 19809 | 8.27E-02 |
| GO:0047045 | testosterone 17-beta-dehydrog     | MF | 7  | 1 | 562 | 3 | 19809 | 8.27E-02 |
| GO:0106005 | RNA 5'-cap (guanine-N7)-metl      | BP | 12 | 1 | 562 | 3 | 19809 | 8.27E-02 |
| GO:0048625 | myoblast fate commitment          | BP | 6  | 1 | 562 | 3 | 19809 | 8.27E-02 |
| GO:0002793 | positive regulation of peptide s  | BP | 9  | 1 | 562 | 3 | 19809 | 8.27E-02 |
| GO:0045959 | negative regulation of comple     | BP | 13 | 1 | 562 | 3 | 19809 | 8.27E-02 |
| GO:0032916 | positive regulation of transfor   | BP | 9  | 1 | 562 | 3 | 19809 | 8.27E-02 |
| GO:0030538 | embryonic genitalia morphoge      | BP | 6  | 1 | 562 | 3 | 19809 | 8.27E-02 |
| GO:0071492 | cellular response to UV-A         | BP | 9  | 1 | 562 | 3 | 19809 | 8.27E-02 |
| GO:1902309 | negative regulation of peptidyl   | BP | 11 | 1 | 562 | 3 | 19809 | 8.27E-02 |
| GO:0035745 | T-helper 2 cell cytokine produ    | BP | 8  | 1 | 562 | 3 | 19809 | 8.27E-02 |
| GO:2001140 | positive regulation of phospho    | BP | 9  | 1 | 562 | 3 | 19809 | 8.27E-02 |
| GO:0002476 | antigen processing and present    | BP | 7  | 1 | 562 | 3 | 19809 | 8.27E-02 |

|            |                                  |    |    |   |     |   |       |          |
|------------|----------------------------------|----|----|---|-----|---|-------|----------|
| GO:0033745 | L-methionine-(R)-S-oxide red     | MF | 7  | 1 | 562 | 3 | 19809 | 8.27E-02 |
| GO:0047804 | cysteine-S-conjugate beta-lyas   | MF | 6  | 1 | 562 | 3 | 19809 | 8.27E-02 |
| GO:0002605 | negative regulation of dendriti  | BP | 8  | 1 | 562 | 3 | 19809 | 8.27E-02 |
| GO:0010046 | response to mycotoxin            | BP | 6  | 1 | 562 | 3 | 19809 | 8.27E-02 |
| GO:0050711 | negative regulation of interleul | BP | 9  | 1 | 562 | 3 | 19809 | 8.27E-02 |
| GO:0060914 | heart formation                  | BP | 6  | 1 | 562 | 3 | 19809 | 8.27E-02 |
| GO:0071871 | response to epinephrine          | BP | 8  | 1 | 562 | 3 | 19809 | 8.27E-02 |
| GO:0005030 | neurotrophin receptor activity   | MF | 5  | 1 | 562 | 3 | 19809 | 8.27E-02 |
| GO:0004558 | alpha-1,4-glucosidase activity   | MF | 9  | 1 | 562 | 3 | 19809 | 8.27E-02 |
| GO:0060559 | positive regulation of calcidiol | BP | 9  | 1 | 562 | 3 | 19809 | 8.27E-02 |
| GO:0009595 | detection of biotic stimulus     | BP | 5  | 1 | 562 | 3 | 19809 | 8.27E-02 |
| GO:0006154 | adenosine catabolic process      | BP | 7  | 1 | 562 | 3 | 19809 | 8.27E-02 |
| GO:0043308 | eosinophil degranulation         | BP | 9  | 1 | 562 | 3 | 19809 | 8.27E-02 |
| GO:0010751 | negative regulation of nitric ox | BP | 10 | 1 | 562 | 3 | 19809 | 8.27E-02 |
| GO:0150020 | basal dendrite arborization      | BP | 11 | 1 | 562 | 3 | 19809 | 8.27E-02 |
| GO:0070012 | oligopeptidase activity          | MF | 6  | 1 | 562 | 3 | 19809 | 8.27E-02 |
| GO:0043420 | anthranilate metabolic process   | BP | 7  | 1 | 562 | 3 | 19809 | 8.27E-02 |
| GO:0044773 | mitotic DNA damage checkpo       | BP | 8  | 1 | 562 | 3 | 19809 | 8.27E-02 |
| GO:0047044 | androstan-3-alpha,17-beta-diol   | MF | 7  | 1 | 562 | 3 | 19809 | 8.27E-02 |
| GO:0000052 | citrulline metabolic process     | BP | 10 | 1 | 562 | 3 | 19809 | 8.27E-02 |
| GO:0097447 | dendritic tree                   | CC | 6  | 1 | 562 | 3 | 19809 | 8.27E-02 |
| GO:0042610 | CD8 receptor binding             | MF | 6  | 1 | 562 | 3 | 19809 | 8.27E-02 |
| GO:1990408 | calcitonin gene-related peptide  | BP | 7  | 1 | 562 | 3 | 19809 | 8.27E-02 |
| GO:0003994 | aconitate hydratase activity     | MF | 7  | 1 | 562 | 3 | 19809 | 8.27E-02 |
| GO:0002374 | cytokine secretion involved in   | BP | 12 | 1 | 562 | 3 | 19809 | 8.27E-02 |
| GO:0035880 | embryonic nail plate morphoge    | BP | 6  | 1 | 562 | 3 | 19809 | 8.27E-02 |
| GO:0030880 | RNA polymerase complex           | CC | 5  | 1 | 562 | 3 | 19809 | 8.27E-02 |
| GO:0046882 | negative regulation of follicle- | BP | 10 | 1 | 562 | 3 | 19809 | 8.27E-02 |
| GO:0002118 | aggressive behavior              | BP | 5  | 1 | 562 | 3 | 19809 | 8.27E-02 |
| GO:0042978 | ornithine decarboxylase activa   | MF | 6  | 1 | 562 | 3 | 19809 | 8.27E-02 |
| GO:0019087 | transformation of host cell by v | BP | 8  | 1 | 562 | 3 | 19809 | 8.27E-02 |
| GO:0097454 | Schwann cell microvillus         | CC | 8  | 1 | 562 | 3 | 19809 | 8.27E-02 |
| GO:0048634 | regulation of muscle organ dev   | BP | 7  | 1 | 562 | 3 | 19809 | 8.27E-02 |
| GO:0044406 | adhesion of symbiont to host     | BP | 4  | 1 | 562 | 3 | 19809 | 8.27E-02 |
| GO:0051795 | positive regulation of timing o  | BP | 10 | 1 | 562 | 3 | 19809 | 8.27E-02 |
| GO:1900005 | positive regulation of serine-ty | BP | 12 | 1 | 562 | 3 | 19809 | 8.27E-02 |
| GO:0072282 | metanephric nephron tubule m     | BP | 10 | 1 | 562 | 3 | 19809 | 8.27E-02 |
| GO:1905684 | regulation of plasma membran     | BP | 9  | 1 | 562 | 3 | 19809 | 8.27E-02 |
| GO:0052851 | ferric-chelate reductase (NAD]   | MF | 7  | 1 | 562 | 3 | 19809 | 8.27E-02 |
| GO:0017159 | pantetheine hydrolase activity   | MF | 7  | 1 | 562 | 3 | 19809 | 8.27E-02 |
| GO:1900449 | regulation of glutamate recept   | BP | 8  | 1 | 562 | 3 | 19809 | 8.27E-02 |
| GO:0038179 | neurotrophin signaling pathwa    | BP | 6  | 1 | 562 | 3 | 19809 | 8.27E-02 |
| GO:0008823 | cupric reductase activity        | MF | 7  | 1 | 562 | 3 | 19809 | 8.27E-02 |
| GO:0004047 | aminomethyltransferase activit   | MF | 7  | 1 | 562 | 3 | 19809 | 8.27E-02 |
| GO:1901491 | negative regulation of lymphar   | BP | 8  | 1 | 562 | 3 | 19809 | 8.27E-02 |
| GO:0018636 | phenanthrene 9,10-monooxyge      | MF | 7  | 1 | 562 | 3 | 19809 | 8.27E-02 |
| GO:0061009 | common bile duct developmen      | BP | 6  | 1 | 562 | 3 | 19809 | 8.27E-02 |
| GO:0042450 | arginine biosynthetic process v  | BP | 13 | 1 | 562 | 3 | 19809 | 8.27E-02 |
| GO:2000974 | negative regulation of pro-B ce  | BP | 10 | 1 | 562 | 3 | 19809 | 8.27E-02 |
| GO:0030070 | insulin processing               | BP | 9  | 1 | 562 | 3 | 19809 | 8.27E-02 |



|            |                                   |    |    |   |     |   |       |          |
|------------|-----------------------------------|----|----|---|-----|---|-------|----------|
| GO:0006598 | polyamine catabolic process       | BP | 10 | 1 | 562 | 3 | 19809 | 8.27E-02 |
| GO:0047655 | allyl-alcohol dehydrogenase ac    | MF | 7  | 1 | 562 | 3 | 19809 | 8.27E-02 |
| GO:0001730 | 2'-5'-oligoadenylate synthetase   | MF | 8  | 1 | 562 | 3 | 19809 | 8.27E-02 |
| GO:0001069 | regulatory region RNA binding     | MF | 7  | 1 | 562 | 3 | 19809 | 8.27E-02 |
| GO:0048382 | mesendoderm development           | BP | 5  | 1 | 562 | 3 | 19809 | 8.27E-02 |
| GO:1905748 | hard palate morphogenesis         | BP | 5  | 1 | 562 | 3 | 19809 | 8.27E-02 |
| GO:1903413 | cellular response to bile acid    | BP | 7  | 1 | 562 | 3 | 19809 | 8.27E-02 |
| GO:0060201 | clathrin-sculpted acetylcholine   | CC | 8  | 1 | 562 | 3 | 19809 | 8.27E-02 |
| GO:0002457 | T cell antigen processing and p   | BP | 5  | 1 | 562 | 3 | 19809 | 8.27E-02 |
| GO:0051280 | negative regulation of release c  | BP | 8  | 1 | 562 | 3 | 19809 | 8.27E-02 |
| GO:0007509 | mesoderm migration involved       | BP | 9  | 1 | 562 | 3 | 19809 | 8.27E-02 |
| GO:0003829 | beta-1,3-galactosyl-O-glycosyl    | MF | 8  | 1 | 562 | 3 | 19809 | 8.27E-02 |
| GO:0002486 | antigen processing and present    | BP | 9  | 1 | 562 | 3 | 19809 | 8.27E-02 |
| GO:0009448 | gamma-aminobutyric acid met       | BP | 9  | 1 | 562 | 3 | 19809 | 8.27E-02 |
| GO:0042269 | regulation of natural killer cell | BP | 7  | 1 | 562 | 3 | 19809 | 8.27E-02 |
| GO:0002689 | negative regulation of leukocy    | BP | 8  | 1 | 562 | 3 | 19809 | 8.27E-02 |
| GO:0032800 | receptor biosynthetic process     | BP | 7  | 1 | 562 | 3 | 19809 | 8.27E-02 |
| GO:0005996 | monosaccharide metabolic pro      | BP | 6  | 1 | 562 | 3 | 19809 | 8.27E-02 |
| GO:0010758 | regulation of macrophage cher     | BP | 8  | 1 | 562 | 3 | 19809 | 8.27E-02 |
| GO:0046879 | hormone secretion                 | BP | 7  | 1 | 562 | 3 | 19809 | 8.27E-02 |
| GO:0090259 | regulation of retinal ganglion c  | BP | 11 | 1 | 562 | 3 | 19809 | 8.27E-02 |
| GO:0021882 | regulation of transcription fro   | BP | 11 | 1 | 562 | 3 | 19809 | 8.27E-02 |
| GO:0050717 | positive regulation of interleuk  | BP | 10 | 1 | 562 | 3 | 19809 | 8.27E-02 |
| GO:0051248 | negative regulation of protein i  | BP | 8  | 1 | 562 | 3 | 19809 | 8.27E-02 |
| GO:0035276 | ethanol binding                   | MF | 5  | 1 | 562 | 3 | 19809 | 8.27E-02 |
| GO:0061146 | Peyer's patch morphogenesis       | BP | 6  | 1 | 562 | 3 | 19809 | 8.27E-02 |
| GO:1905114 | cell surface receptor signaling   | BP | 6  | 1 | 562 | 3 | 19809 | 8.27E-02 |
| GO:0004875 | complement receptor activity      | MF | 6  | 1 | 562 | 3 | 19809 | 8.27E-02 |
| GO:0070735 | protein-glycine ligase activity   | MF | 7  | 1 | 562 | 3 | 19809 | 8.27E-02 |
| GO:0045925 | positive regulation of female r   | BP | 8  | 1 | 562 | 3 | 19809 | 8.27E-02 |
| GO:0032485 | regulation of Ral protein signa   | BP | 11 | 1 | 562 | 3 | 19809 | 8.27E-02 |
| GO:0097638 | L-arginine import across plas     | BP | 13 | 1 | 562 | 3 | 19809 | 8.27E-02 |
| GO:0008109 | N-acetyllactosaminide beta-1,(    | MF | 8  | 1 | 562 | 3 | 19809 | 8.27E-02 |
| GO:0008597 | calcium-dependent protein seri    | MF | 7  | 1 | 562 | 3 | 19809 | 8.27E-02 |
| GO:0044393 | microspike                        | CC | 6  | 1 | 562 | 3 | 19809 | 8.27E-02 |
| GO:0019805 | quinolinate biosynthetic proce    | BP | 10 | 1 | 562 | 3 | 19809 | 8.27E-02 |
| GO:0050912 | detection of chemical stimulus    | BP | 7  | 1 | 562 | 3 | 19809 | 8.27E-02 |
| GO:0019254 | carnitine metabolic process, C    | BP | 8  | 1 | 562 | 3 | 19809 | 8.27E-02 |
| GO:0072300 | positive regulation of metanep    | BP | 10 | 1 | 562 | 3 | 19809 | 8.27E-02 |
| GO:0003278 | apoptotic process involved in l   | BP | 9  | 1 | 562 | 3 | 19809 | 8.27E-02 |
| GO:0032142 | single guanine insertion bindin   | MF | 11 | 1 | 562 | 3 | 19809 | 8.27E-02 |
| GO:0035809 | regulation of urine volume        | BP | 6  | 1 | 562 | 3 | 19809 | 8.27E-02 |
| GO:0045608 | negative regulation of inner ea   | BP | 8  | 1 | 562 | 3 | 19809 | 8.27E-02 |
| GO:0071074 | eukaryotic initiation factor eIF  | MF | 6  | 1 | 562 | 3 | 19809 | 8.27E-02 |
| GO:0045054 | constitutive secretory pathway    | BP | 8  | 1 | 562 | 3 | 19809 | 8.27E-02 |
| GO:0098583 | learned vocalization behavior     | BP | 5  | 1 | 562 | 3 | 19809 | 8.27E-02 |
| GO:0000023 | maltose metabolic process         | BP | 8  | 1 | 562 | 3 | 19809 | 8.27E-02 |
| GO:0047718 | indanol dehydrogenase activity    | MF | 7  | 1 | 562 | 3 | 19809 | 8.27E-02 |
| GO:1904693 | midbrain morphogenesis            | BP | 5  | 1 | 562 | 3 | 19809 | 8.27E-02 |
| GO:0004117 | calmodulin-dependent cyclic-n     | MF | 10 | 1 | 562 | 3 | 19809 | 8.27E-02 |

|            |                                   |    |    |   |     |     |       |          |
|------------|-----------------------------------|----|----|---|-----|-----|-------|----------|
| GO:0005220 | inositol 1,4,5-trisphosphate-sei  | MF | 10 | 1 | 562 | 3   | 19809 | 8.27E-02 |
| GO:0060693 | regulation of branching involv    | BP | 8  | 1 | 562 | 3   | 19809 | 8.27E-02 |
| GO:0072049 | comma-shaped body morphoge        | BP | 5  | 1 | 562 | 3   | 19809 | 8.27E-02 |
| GO:0098706 | iron ion import across cell out   | BP | 12 | 1 | 562 | 3   | 19809 | 8.27E-02 |
| GO:0006203 | dGTP catabolic process            | BP | 12 | 1 | 562 | 3   | 19809 | 8.27E-02 |
| GO:0071379 | cellular response to prostaglan   | BP | 7  | 1 | 562 | 3   | 19809 | 8.27E-02 |
| GO:0002503 | peptide antigen assembly with     | BP | 9  | 1 | 562 | 3   | 19809 | 8.27E-02 |
| GO:0071691 | cardiac muscle thin filament a    | BP | 7  | 1 | 562 | 3   | 19809 | 8.27E-02 |
| GO:0051684 | maintenance of Golgi location     | BP | 7  | 1 | 562 | 3   | 19809 | 8.27E-02 |
| GO:0097053 | L-kynurenine catabolic proces     | BP | 7  | 1 | 562 | 3   | 19809 | 8.27E-02 |
| GO:1901671 | positive regulation of superoxi   | BP | 8  | 1 | 562 | 3   | 19809 | 8.27E-02 |
| GO:0071363 | cellular response to growth fac   | BP | 7  | 4 | 562 | 59  | 19809 | 8.62E-02 |
| GO:0006953 | acute-phase response              | BP | 8  | 3 | 562 | 37  | 19809 | 8.68E-02 |
| GO:0007498 | mesoderm development              | BP | 6  | 3 | 562 | 37  | 19809 | 8.68E-02 |
| GO:0001772 | immunological synapse             | CC | 5  | 3 | 562 | 37  | 19809 | 8.68E-02 |
| GO:0017147 | Wnt-protein binding               | MF | 5  | 3 | 562 | 37  | 19809 | 8.68E-02 |
| GO:0042056 | chemoattractant activity          | MF | 7  | 3 | 562 | 37  | 19809 | 8.68E-02 |
| GO:0051289 | protein homotetramerization       | BP | 9  | 5 | 562 | 83  | 19809 | 8.70E-02 |
| GO:0071356 | cellular response to tumor necr   | BP | 8  | 7 | 562 | 134 | 19809 | 8.74E-02 |
| GO:0009615 | response to virus                 | BP | 7  | 6 | 562 | 109 | 19809 | 9.00E-02 |
| GO:0061001 | regulation of dendritic spine m   | BP | 10 | 2 | 562 | 18  | 19809 | 9.12E-02 |
| GO:0044849 | estrous cycle                     | BP | 5  | 2 | 562 | 18  | 19809 | 9.12E-02 |
| GO:0071318 | cellular response to ATP          | BP | 9  | 2 | 562 | 18  | 19809 | 9.12E-02 |
| GO:0071360 | cellular response to exogenous    | BP | 9  | 2 | 562 | 18  | 19809 | 9.12E-02 |
| GO:0001818 | negative regulation of cytokine   | BP | 7  | 2 | 562 | 18  | 19809 | 9.12E-02 |
| GO:0048598 | embryonic morphogenesis           | BP | 5  | 2 | 562 | 18  | 19809 | 9.12E-02 |
| GO:2000114 | regulation of establishment of    | BP | 7  | 2 | 562 | 18  | 19809 | 9.12E-02 |
| GO:0045780 | positive regulation of bone res   | BP | 9  | 2 | 562 | 18  | 19809 | 9.12E-02 |
| GO:0010529 | negative regulation of transpos   | BP | 7  | 2 | 562 | 18  | 19809 | 9.12E-02 |
| GO:0004866 | endopeptidase inhibitor activit   | MF | 7  | 3 | 562 | 38  | 19809 | 9.24E-02 |
| GO:0034614 | cellular response to reactive ox  | BP | 7  | 3 | 562 | 38  | 19809 | 9.24E-02 |
| GO:0007163 | establishment or maintenance      | BP | 4  | 3 | 562 | 38  | 19809 | 9.24E-02 |
| GO:0072659 | protein localization to plasma    | BP | 8  | 7 | 562 | 136 | 19809 | 9.27E-02 |
| GO:0006631 | fatty acid metabolic process      | BP | 9  | 8 | 562 | 163 | 19809 | 9.33E-02 |
| GO:0071345 | cellular response to cytokine st  | BP | 7  | 4 | 562 | 61  | 19809 | 9.47E-02 |
| GO:0043406 | positive regulation of MAP kir    | BP | 12 | 4 | 562 | 61  | 19809 | 9.47E-02 |
| GO:0048013 | ephrin receptor signaling pathv   | BP | 8  | 5 | 562 | 86  | 19809 | 9.76E-02 |
| GO:0008219 | cell death                        | BP | 4  | 3 | 562 | 39  | 19809 | 9.81E-02 |
| GO:0032781 | positive regulation of ATPase     | BP | 8  | 3 | 562 | 39  | 19809 | 9.81E-02 |
| GO:0006006 | glucose metabolic process         | BP | 8  | 4 | 562 | 62  | 19809 | 9.91E-02 |
| GO:0042826 | histone deacetylase binding       | MF | 6  | 6 | 562 | 112 | 19809 | 9.93E-02 |
| GO:0007520 | myoblast fusion                   | BP | 6  | 2 | 562 | 19  | 19809 | 1.00E-01 |
| GO:0002076 | osteoblast development            | BP | 6  | 2 | 562 | 19  | 19809 | 1.00E-01 |
| GO:0033280 | response to vitamin D             | BP | 7  | 2 | 562 | 19  | 19809 | 1.00E-01 |
| GO:0008157 | protein phosphatase 1 binding     | MF | 8  | 2 | 562 | 19  | 19809 | 1.00E-01 |
| GO:0010038 | response to metal ion             | BP | 6  | 2 | 562 | 19  | 19809 | 1.00E-01 |
| GO:0008340 | determination of adult lifespan   | BP | 4  | 2 | 562 | 19  | 19809 | 1.00E-01 |
| GO:0007263 | nitric oxide mediated signal tra  | BP | 7  | 2 | 562 | 19  | 19809 | 1.00E-01 |
| GO:0004653 | polypeptide N-acetylgalactosa     | MF | 8  | 2 | 562 | 19  | 19809 | 1.00E-01 |
| GO:0060252 | positive regulation of glial cell | BP | 8  | 2 | 562 | 19  | 19809 | 1.00E-01 |

|            |                                  |    |    |   |     |     |       |          |
|------------|----------------------------------|----|----|---|-----|-----|-------|----------|
| GO:0030150 | protein import into mitochondri  | BP | 12 | 2 | 562 | 19  | 19809 | 1.00E-01 |
| GO:0031668 | cellular response to extracellul | BP | 5  | 2 | 562 | 19  | 19809 | 1.00E-01 |
| GO:0006869 | lipid transport                  | BP | 7  | 7 | 562 | 139 | 19809 | 1.01E-01 |
| GO:0030509 | BMP signaling pathway            | BP | 10 | 5 | 562 | 87  | 19809 | 1.01E-01 |
| GO:0051607 | defense response to virus        | BP | 5  | 9 | 562 | 194 | 19809 | 1.02E-01 |
| GO:0035019 | somatic stem cell population n   | BP | 5  | 4 | 562 | 63  | 19809 | 1.04E-01 |
| GO:0034446 | substrate adhesion-dependent c   | BP | 8  | 3 | 562 | 40  | 19809 | 1.04E-01 |
| GO:0070491 | repressing transcription factor  | MF | 7  | 3 | 562 | 40  | 19809 | 1.04E-01 |
| GO:0030217 | T cell differentiation           | BP | 8  | 3 | 562 | 40  | 19809 | 1.04E-01 |
| GO:0090263 | positive regulation of canonica  | BP | 10 | 7 | 562 | 141 | 19809 | 1.07E-01 |
| GO:0042472 | inner ear morphogenesis          | BP | 6  | 4 | 562 | 64  | 19809 | 1.08E-01 |
| GO:0050839 | cell adhesion molecule binding   | MF | 5  | 4 | 562 | 64  | 19809 | 1.08E-01 |
| GO:0051965 | positive regulation of synapse   | BP | 7  | 4 | 562 | 64  | 19809 | 1.08E-01 |
| GO:0008349 | MAP kinase kinase kinase kin     | MF | 9  | 1 | 562 | 4   | 19809 | 1.09E-01 |
| GO:0060676 | ureteric bud formation           | BP | 10 | 1 | 562 | 4   | 19809 | 1.09E-01 |
| GO:0102345 | 3-hydroxy-lignoceroyl-CoA de     | MF | 7  | 1 | 562 | 4   | 19809 | 1.09E-01 |
| GO:1905643 | positive regulation of DNA me    | BP | 10 | 1 | 562 | 4   | 19809 | 1.09E-01 |
| GO:0006931 | substrate-dependent cell migra   | BP | 6  | 1 | 562 | 4   | 19809 | 1.09E-01 |
| GO:0003839 | gamma-glutamylcyclotransfer      | MF | 7  | 1 | 562 | 4   | 19809 | 1.09E-01 |
| GO:0097643 | amylin receptor activity         | MF | 8  | 1 | 562 | 4   | 19809 | 1.09E-01 |
| GO:0090599 | alpha-glucosidase activity       | MF | 8  | 1 | 562 | 4   | 19809 | 1.09E-01 |
| GO:0097367 | carbohydrate derivative bindin   | MF | 4  | 1 | 562 | 4   | 19809 | 1.09E-01 |
| GO:0071395 | cellular response to jasmonic a  | BP | 7  | 1 | 562 | 4   | 19809 | 1.09E-01 |
| GO:0006546 | glycine catabolic process        | BP | 12 | 1 | 562 | 4   | 19809 | 1.09E-01 |
| GO:0051707 | response to other organism       | BP | 6  | 1 | 562 | 4   | 19809 | 1.09E-01 |
| GO:0003274 | endocardial cushion fusion       | BP | 6  | 1 | 562 | 4   | 19809 | 1.09E-01 |
| GO:1903238 | positive regulation of leukocyt  | BP | 9  | 1 | 562 | 4   | 19809 | 1.09E-01 |
| GO:0035751 | regulation of lysosomal lumen    | BP | 13 | 1 | 562 | 4   | 19809 | 1.09E-01 |
| GO:1905049 | negative regulation of metallo   | BP | 11 | 1 | 562 | 4   | 19809 | 1.09E-01 |
| GO:1901078 | negative regulation of relaxati  | BP | 7  | 1 | 562 | 4   | 19809 | 1.09E-01 |
| GO:0060534 | trachea cartilage development    | BP | 7  | 1 | 562 | 4   | 19809 | 1.09E-01 |
| GO:1900245 | positive regulation of MDA-5     | BP | 8  | 1 | 562 | 4   | 19809 | 1.09E-01 |
| GO:0051098 | regulation of binding            | BP | 5  | 1 | 562 | 4   | 19809 | 1.09E-01 |
| GO:2000666 | negative regulation of interleu  | BP | 9  | 1 | 562 | 4   | 19809 | 1.09E-01 |
| GO:0015734 | taurine transport                | BP | 10 | 1 | 562 | 4   | 19809 | 1.09E-01 |
| GO:0007161 | calcium-independent cell-matr    | BP | 7  | 1 | 562 | 4   | 19809 | 1.09E-01 |
| GO:0050974 | detection of mechanical stimul   | BP | 6  | 1 | 562 | 4   | 19809 | 1.09E-01 |
| GO:0001880 | Mullerian duct regression        | BP | 5  | 1 | 562 | 4   | 19809 | 1.09E-01 |
| GO:1903278 | positive regulation of sodium i  | BP | 12 | 1 | 562 | 4   | 19809 | 1.09E-01 |
| GO:0070384 | Harderian gland development      | BP | 7  | 1 | 562 | 4   | 19809 | 1.09E-01 |
| GO:0004982 | N-formyl peptide receptor acti   | MF | 7  | 1 | 562 | 4   | 19809 | 1.09E-01 |
| GO:0051400 | BH domain binding                | MF | 6  | 1 | 562 | 4   | 19809 | 1.09E-01 |
| GO:0021575 | hindbrain morphogenesis          | BP | 5  | 1 | 562 | 4   | 19809 | 1.09E-01 |
| GO:0021555 | midbrain-hindbrain boundary 1    | BP | 6  | 1 | 562 | 4   | 19809 | 1.09E-01 |
| GO:0004112 | cyclic-nucleotide phosphodies    | MF | 8  | 1 | 562 | 4   | 19809 | 1.09E-01 |
| GO:1901837 | negative regulation of transcri  | BP | 11 | 1 | 562 | 4   | 19809 | 1.09E-01 |
| GO:0070884 | regulation of calcineurin-NFA'   | BP | 11 | 1 | 562 | 4   | 19809 | 1.09E-01 |
| GO:0031587 | positive regulation of inositol  | BP | 11 | 1 | 562 | 4   | 19809 | 1.09E-01 |
| GO:0102420 | sn-1-glycerol-3-phosphate C1     | MF | 7  | 1 | 562 | 4   | 19809 | 1.09E-01 |
| GO:0060923 | cardiac muscle cell fate comm    | BP | 7  | 1 | 562 | 4   | 19809 | 1.09E-01 |

|            |                                  |    |    |   |     |   |       |          |
|------------|----------------------------------|----|----|---|-----|---|-------|----------|
| GO:0030947 | regulation of vascular endothel  | BP | 8  | 1 | 562 | 4 | 19809 | 1.09E-01 |
| GO:1901299 | negative regulation of hydroge   | BP | 9  | 1 | 562 | 4 | 19809 | 1.09E-01 |
| GO:0001515 | opioid peptide activity          | MF | 7  | 1 | 562 | 4 | 19809 | 1.09E-01 |
| GO:0060203 | clathrin-sculpted glutamate tra  | CC | 8  | 1 | 562 | 4 | 19809 | 1.09E-01 |
| GO:0015853 | adenine transport                | BP | 9  | 1 | 562 | 4 | 19809 | 1.09E-01 |
| GO:0030730 | sequestering of triglyceride     | BP | 6  | 1 | 562 | 4 | 19809 | 1.09E-01 |
| GO:0035166 | post-embryonic hemopoiesis       | BP | 8  | 1 | 562 | 4 | 19809 | 1.09E-01 |
| GO:0036336 | dendritic cell migration         | BP | 5  | 1 | 562 | 4 | 19809 | 1.09E-01 |
| GO:0048105 | establishment of body hair pla   | BP | 8  | 1 | 562 | 4 | 19809 | 1.09E-01 |
| GO:1905867 | epididymis development           | BP | 6  | 1 | 562 | 4 | 19809 | 1.09E-01 |
| GO:0031014 | troponin T binding               | MF | 6  | 1 | 562 | 4 | 19809 | 1.09E-01 |
| GO:0010724 | regulation of definitive erythrc | BP | 9  | 1 | 562 | 4 | 19809 | 1.09E-01 |
| GO:0016807 | cysteine-type carboxypeptidas    | MF | 9  | 1 | 562 | 4 | 19809 | 1.09E-01 |
| GO:0042168 | heme metabolic process           | BP | 8  | 1 | 562 | 4 | 19809 | 1.09E-01 |
| GO:0051450 | myoblast proliferation           | BP | 4  | 1 | 562 | 4 | 19809 | 1.09E-01 |
| GO:0006499 | N-terminal protein myristoylat   | BP | 11 | 1 | 562 | 4 | 19809 | 1.09E-01 |
| GO:0023029 | MHC class Ib protein binding     | MF | 7  | 1 | 562 | 4 | 19809 | 1.09E-01 |
| GO:0001635 | calcitonin gene-related peptide  | MF | 8  | 1 | 562 | 4 | 19809 | 1.09E-01 |
| GO:0070820 | tertiary granule                 | CC | 9  | 1 | 562 | 4 | 19809 | 1.09E-01 |
| GO:0071896 | protein localization to adheren  | BP | 7  | 1 | 562 | 4 | 19809 | 1.09E-01 |
| GO:0045833 | negative regulation of lipid me  | BP | 7  | 1 | 562 | 4 | 19809 | 1.09E-01 |
| GO:0097296 | activation of cysteine-type end  | BP | 12 | 1 | 562 | 4 | 19809 | 1.09E-01 |
| GO:0002155 | regulation of thyroid hormone    | BP | 8  | 1 | 562 | 4 | 19809 | 1.09E-01 |
| GO:0015770 | sucrose transport                | BP | 10 | 1 | 562 | 4 | 19809 | 1.09E-01 |
| GO:0005471 | ATP:ADP antiporter activity      | MF | 10 | 1 | 562 | 4 | 19809 | 1.09E-01 |
| GO:0021892 | cerebral cortex GABAergic int    | BP | 9  | 1 | 562 | 4 | 19809 | 1.09E-01 |
| GO:0002826 | negative regulation of T-helpe   | BP | 10 | 1 | 562 | 4 | 19809 | 1.09E-01 |
| GO:0140058 | neuron projection arborization   | BP | 9  | 1 | 562 | 4 | 19809 | 1.09E-01 |
| GO:0016508 | long-chain-enoyl-CoA hydrata     | MF | 7  | 1 | 562 | 4 | 19809 | 1.09E-01 |
| GO:0031628 | opioid receptor binding          | MF | 7  | 1 | 562 | 4 | 19809 | 1.09E-01 |
| GO:0003186 | tricuspid valve morphogenesis    | BP | 7  | 1 | 562 | 4 | 19809 | 1.09E-01 |
| GO:0030888 | regulation of B cell proliferati | BP | 10 | 1 | 562 | 4 | 19809 | 1.09E-01 |
| GO:0000818 | nuclear MIS12/MIND comple        | CC | 5  | 1 | 562 | 4 | 19809 | 1.09E-01 |
| GO:0016888 | endodeoxyribonuclease activit    | MF | 9  | 1 | 562 | 4 | 19809 | 1.09E-01 |
| GO:0050265 | RNA uridylyltransferase activi   | MF | 8  | 1 | 562 | 4 | 19809 | 1.09E-01 |
| GO:0010748 | negative regulation of long-ch   | BP | 11 | 1 | 562 | 4 | 19809 | 1.09E-01 |
| GO:0060513 | prostatic bud formation          | BP | 8  | 1 | 562 | 4 | 19809 | 1.09E-01 |
| GO:0010916 | negative regulation of very-lov  | BP | 8  | 1 | 562 | 4 | 19809 | 1.09E-01 |
| GO:0002051 | osteoblast fate commitment       | BP | 6  | 1 | 562 | 4 | 19809 | 1.09E-01 |
| GO:0102344 | 3-hydroxy-behenoyl-CoA dehy      | MF | 7  | 1 | 562 | 4 | 19809 | 1.09E-01 |
| GO:0005124 | scavenger receptor binding       | MF | 6  | 1 | 562 | 4 | 19809 | 1.09E-01 |
| GO:0097013 | phagocytic vesicle lumen         | CC | 8  | 1 | 562 | 4 | 19809 | 1.09E-01 |
| GO:0019693 | ribose phosphate metabolic pro   | BP | 7  | 1 | 562 | 4 | 19809 | 1.09E-01 |
| GO:0072050 | S-shaped body morphogenesis      | BP | 5  | 1 | 562 | 4 | 19809 | 1.09E-01 |
| GO:0030943 | mitochondrion targeting seque    | MF | 7  | 1 | 562 | 4 | 19809 | 1.09E-01 |
| GO:0032376 | positive regulation of choleste  | BP | 10 | 1 | 562 | 4 | 19809 | 1.09E-01 |
| GO:0071677 | positive regulation of mononu    | BP | 8  | 1 | 562 | 4 | 19809 | 1.09E-01 |
| GO:1905166 | negative regulation of lysosom   | BP | 11 | 1 | 562 | 4 | 19809 | 1.09E-01 |
| GO:1904894 | positive regulation of receptor  | BP | 9  | 1 | 562 | 4 | 19809 | 1.09E-01 |
| GO:0003352 | regulation of cilium movement    | BP | 8  | 1 | 562 | 4 | 19809 | 1.09E-01 |

|            |                                        |    |    |   |     |   |       |          |
|------------|----------------------------------------|----|----|---|-----|---|-------|----------|
| GO:0030055 | cell-substrate junction                | CC | 4  | 1 | 562 | 4 | 19809 | 1.09E-01 |
| GO:0033353 | S-adenosylmethionine cycle             | BP | 6  | 1 | 562 | 4 | 19809 | 1.09E-01 |
| GO:0016048 | detection of temperature stimu         | BP | 6  | 1 | 562 | 4 | 19809 | 1.09E-01 |
| GO:0061333 | renal tubule morphogenesis             | BP | 8  | 1 | 562 | 4 | 19809 | 1.09E-01 |
| GO:1902951 | negative regulation of dendriti        | BP | 9  | 1 | 562 | 4 | 19809 | 1.09E-01 |
| GO:0060161 | positive regulation of dopamin         | BP | 10 | 1 | 562 | 4 | 19809 | 1.09E-01 |
| GO:0043218 | compact myelin                         | CC | 4  | 1 | 562 | 4 | 19809 | 1.09E-01 |
| GO:0035910 | ascending aorta morphogenesi           | BP | 5  | 1 | 562 | 4 | 19809 | 1.09E-01 |
| GO:0060665 | regulation of branching involv         | BP | 7  | 1 | 562 | 4 | 19809 | 1.09E-01 |
| GO:0022028 | tangential migration from the s        | BP | 9  | 1 | 562 | 4 | 19809 | 1.09E-01 |
| GO:0090330 | regulation of platelet aggregati       | BP | 9  | 1 | 562 | 4 | 19809 | 1.09E-01 |
| GO:0072012 | glomerulus vasculature develo          | BP | 6  | 1 | 562 | 4 | 19809 | 1.09E-01 |
| GO:1905232 | cellular response to L-glutama         | BP | 9  | 1 | 562 | 4 | 19809 | 1.09E-01 |
| GO:1990696 | USH2 complex                           | CC | 4  | 1 | 562 | 4 | 19809 | 1.09E-01 |
| GO:1903845 | negative regulation of cellular        | BP | 8  | 1 | 562 | 4 | 19809 | 1.09E-01 |
| GO:0015189 | L-lysine transmembrane transp          | MF | 7  | 1 | 562 | 4 | 19809 | 1.09E-01 |
| GO:0045604 | regulation of epidermal cell di        | BP | 8  | 1 | 562 | 4 | 19809 | 1.09E-01 |
| GO:0016361 | activin receptor activity, type I      | MF | 11 | 1 | 562 | 4 | 19809 | 1.09E-01 |
| GO:0032375 | negative regulation of choleste        | BP | 10 | 1 | 562 | 4 | 19809 | 1.09E-01 |
| GO:0071409 | cellular response to cyclohexir        | BP | 7  | 1 | 562 | 4 | 19809 | 1.09E-01 |
| GO:0035799 | ureter maturation                      | BP | 7  | 1 | 562 | 4 | 19809 | 1.09E-01 |
| GO:0018119 | peptidyl-cysteine S-nitrosylati        | BP | 10 | 1 | 562 | 4 | 19809 | 1.09E-01 |
| GO:0016080 | synaptic vesicle targeting             | BP | 5  | 1 | 562 | 4 | 19809 | 1.09E-01 |
| GO:0018094 | protein polyglycylation                | BP | 11 | 1 | 562 | 4 | 19809 | 1.09E-01 |
| GO:0048368 | lateral mesoderm development           | BP | 7  | 1 | 562 | 4 | 19809 | 1.09E-01 |
| GO:0014802 | terminal cisterna                      | CC | 7  | 1 | 562 | 4 | 19809 | 1.09E-01 |
| GO:0047115 | trans-1,2-dihydrobenzene-1,2- $\alpha$ | MF | 7  | 1 | 562 | 4 | 19809 | 1.09E-01 |
| GO:0008506 | sucrose:proton symporter activ         | MF | 8  | 1 | 562 | 4 | 19809 | 1.09E-01 |
| GO:0038165 | oncostatin-M-mediated signali          | BP | 7  | 1 | 562 | 4 | 19809 | 1.09E-01 |
| GO:0035585 | calcium-mediated signaling us          | BP | 8  | 1 | 562 | 4 | 19809 | 1.09E-01 |
| GO:0042534 | regulation of tumor necrosis fa        | BP | 9  | 1 | 562 | 4 | 19809 | 1.09E-01 |
| GO:0051712 | positive regulation of killing o       | BP | 7  | 1 | 562 | 4 | 19809 | 1.09E-01 |
| GO:0051414 | response to cortisol                   | BP | 6  | 1 | 562 | 4 | 19809 | 1.09E-01 |
| GO:0035112 | genitalia morphogenesis                | BP | 5  | 1 | 562 | 4 | 19809 | 1.09E-01 |
| GO:0004619 | phosphoglycerate mutase activ          | MF | 7  | 1 | 562 | 4 | 19809 | 1.09E-01 |
| GO:0043121 | neurotrophin binding                   | MF | 6  | 1 | 562 | 4 | 19809 | 1.09E-01 |
| GO:0042296 | ISG15 transferase activity             | MF | 6  | 1 | 562 | 4 | 19809 | 1.09E-01 |
| GO:0102343 | 3-hydroxy-arachidoyl-CoA del           | MF | 7  | 1 | 562 | 4 | 19809 | 1.09E-01 |
| GO:0071359 | cellular response to dsRNA             | BP | 8  | 1 | 562 | 4 | 19809 | 1.09E-01 |
| GO:0038162 | erythropoietin-mediated signal         | BP | 7  | 1 | 562 | 4 | 19809 | 1.09E-01 |
| GO:0009264 | deoxyribonucleotide catabolic          | BP | 10 | 1 | 562 | 4 | 19809 | 1.09E-01 |
| GO:0050867 | positive regulation of cell activ      | BP | 7  | 1 | 562 | 4 | 19809 | 1.09E-01 |
| GO:0033031 | positive regulation of neutroph        | BP | 7  | 1 | 562 | 4 | 19809 | 1.09E-01 |
| GO:0071733 | transcriptional activation by pr       | BP | 11 | 1 | 562 | 4 | 19809 | 1.09E-01 |
| GO:0003253 | cardiac neural crest cell migrat       | BP | 9  | 1 | 562 | 4 | 19809 | 1.09E-01 |
| GO:0102158 | very-long-chain 3-hydroxyacyl          | MF | 7  | 1 | 562 | 4 | 19809 | 1.09E-01 |
| GO:0060159 | regulation of dopamine receptc         | BP | 9  | 1 | 562 | 4 | 19809 | 1.09E-01 |
| GO:0034767 | positive regulation of ion trans       | BP | 9  | 1 | 562 | 4 | 19809 | 1.09E-01 |
| GO:0010730 | negative regulation of hydroge         | BP | 10 | 1 | 562 | 4 | 19809 | 1.09E-01 |
| GO:0015181 | arginine transmembrane transp          | MF | 7  | 1 | 562 | 4 | 19809 | 1.09E-01 |

|            |                                  |    |    |    |     |     |       |          |
|------------|----------------------------------|----|----|----|-----|-----|-------|----------|
| GO:0090554 | phosphatidylcholine-translocat   | MF | 7  | 1  | 562 | 4   | 19809 | 1.09E-01 |
| GO:0048742 | regulation of skeletal muscle fi | BP | 10 | 1  | 562 | 4   | 19809 | 1.09E-01 |
| GO:0004082 | bisphosphoglycerate mutase ac    | MF | 7  | 1  | 562 | 4   | 19809 | 1.09E-01 |
| GO:0042904 | 9-cis-retinoic acid biosynthetic | BP | 12 | 1  | 562 | 4   | 19809 | 1.09E-01 |
| GO:0016447 | somatic recombination of imm     | BP | 6  | 1  | 562 | 4   | 19809 | 1.09E-01 |
| GO:0010041 | response to iron(III) ion        | BP | 8  | 1  | 562 | 4   | 19809 | 1.09E-01 |
| GO:0010521 | telomerase inhibitor activity    | MF | 6  | 1  | 562 | 4   | 19809 | 1.09E-01 |
| GO:0003219 | cardiac right ventricle formati  | BP | 7  | 1  | 562 | 4   | 19809 | 1.09E-01 |
| GO:0060700 | regulation of ribonuclease acti  | BP | 9  | 1  | 562 | 4   | 19809 | 1.09E-01 |
| GO:0060355 | positive regulation of cell adhe | BP | 7  | 1  | 562 | 4   | 19809 | 1.09E-01 |
| GO:0043242 | negative regulation of protein c | BP | 8  | 1  | 562 | 4   | 19809 | 1.09E-01 |
| GO:0070779 | D-aspartate import across plas   | BP | 13 | 1  | 562 | 4   | 19809 | 1.09E-01 |
| GO:0032909 | regulation of transforming gro   | BP | 8  | 1  | 562 | 4   | 19809 | 1.09E-01 |
| GO:1905477 | positive regulation of protein l | BP | 7  | 1  | 562 | 4   | 19809 | 1.09E-01 |
| GO:0033743 | peptide-methionine (R)-S-oxid    | MF | 7  | 1  | 562 | 4   | 19809 | 1.09E-01 |
| GO:0035089 | establishment of apical/basal c  | BP | 7  | 1  | 562 | 4   | 19809 | 1.09E-01 |
| GO:0060244 | negative regulation of cell prol | BP | 8  | 1  | 562 | 4   | 19809 | 1.09E-01 |
| GO:0051791 | medium-chain fatty acid metat    | BP | 10 | 1  | 562 | 4   | 19809 | 1.09E-01 |
| GO:0048713 | regulation of oligodendrocyte c  | BP | 11 | 1  | 562 | 4   | 19809 | 1.09E-01 |
| GO:0016742 | hydroxymethyl-, formyl- and r    | MF | 6  | 1  | 562 | 4   | 19809 | 1.09E-01 |
| GO:0072594 | establishment of protein locali  | BP | 8  | 1  | 562 | 4   | 19809 | 1.09E-01 |
| GO:0016278 | lysine N-methyltransferase act   | MF | 8  | 1  | 562 | 4   | 19809 | 1.09E-01 |
| GO:0070851 | growth factor receptor binding   | MF | 6  | 1  | 562 | 4   | 19809 | 1.09E-01 |
| GO:0004366 | glycerol-3-phosphate O-acyltr    | MF | 8  | 1  | 562 | 4   | 19809 | 1.09E-01 |
| GO:0065002 | intracellular protein transmeml  | BP | 11 | 1  | 562 | 4   | 19809 | 1.09E-01 |
| GO:0007010 | cytoskeleton organization        | BP | 6  | 8  | 562 | 169 | 19809 | 1.09E-01 |
| GO:0043410 | positive regulation of MAPK c    | BP | 11 | 6  | 562 | 115 | 19809 | 1.09E-01 |
| GO:0005242 | inward rectifier potassium cha   | MF | 10 | 2  | 562 | 20  | 19809 | 1.09E-01 |
| GO:0006509 | membrane protein ectodomain      | BP | 9  | 2  | 562 | 20  | 19809 | 1.09E-01 |
| GO:0006885 | regulation of pH                 | BP | 10 | 2  | 562 | 20  | 19809 | 1.09E-01 |
| GO:0050730 | regulation of peptidyl-tyrosine  | BP | 10 | 2  | 562 | 20  | 19809 | 1.09E-01 |
| GO:0008637 | apoptotic mitochondrial chang    | BP | 7  | 2  | 562 | 20  | 19809 | 1.09E-01 |
| GO:0045638 | negative regulation of myeloid   | BP | 8  | 2  | 562 | 20  | 19809 | 1.09E-01 |
| GO:0007178 | transmembrane receptor protei    | BP | 7  | 2  | 562 | 20  | 19809 | 1.09E-01 |
| GO:0023019 | signal transduction involved in  | BP | 5  | 2  | 562 | 20  | 19809 | 1.09E-01 |
| GO:0031435 | mitogen-activated protein kina   | MF | 8  | 2  | 562 | 20  | 19809 | 1.09E-01 |
| GO:0032332 | positive regulation of chondro   | BP | 8  | 2  | 562 | 20  | 19809 | 1.09E-01 |
| GO:0016327 | apicolateral plasma membrane     | CC | 5  | 2  | 562 | 20  | 19809 | 1.09E-01 |
| GO:0099175 | regulation of postsynapse orga   | BP | 8  | 2  | 562 | 20  | 19809 | 1.09E-01 |
| GO:1990573 | potassium ion import across pl   | BP | 11 | 3  | 562 | 41  | 19809 | 1.10E-01 |
| GO:0048706 | embryonic skeletal system dev    | BP | 7  | 3  | 562 | 41  | 19809 | 1.10E-01 |
| GO:0017046 | peptide hormone binding          | MF | 6  | 3  | 562 | 41  | 19809 | 1.10E-01 |
| GO:0017048 | Rho GTPase binding               | MF | 9  | 3  | 562 | 41  | 19809 | 1.10E-01 |
| GO:0001942 | hair follicle development        | BP | 6  | 3  | 562 | 41  | 19809 | 1.10E-01 |
| GO:0042130 | negative regulation of T cell pi | BP | 11 | 3  | 562 | 41  | 19809 | 1.10E-01 |
| GO:0015629 | actin cytoskeleton               | CC | 7  | 10 | 562 | 226 | 19809 | 1.11E-01 |
| GO:0016055 | Wnt signaling pathway            | BP | 7  | 10 | 562 | 226 | 19809 | 1.11E-01 |
| GO:0007030 | Golgi organization               | BP | 6  | 6  | 562 | 116 | 19809 | 1.12E-01 |
| GO:0051592 | response to calcium ion          | BP | 7  | 4  | 562 | 65  | 19809 | 1.13E-01 |
| GO:0031225 | anchored component of memb       | CC | 5  | 7  | 562 | 143 | 19809 | 1.13E-01 |

|            |                                  |    |    |     |     |      |       |          |
|------------|----------------------------------|----|----|-----|-----|------|-------|----------|
| GO:0019899 | enzyme binding                   | MF | 5  | 15  | 562 | 375  | 19809 | 1.16E-01 |
| GO:0045184 | establishment of protein locali: | BP | 6  | 3   | 562 | 42   | 19809 | 1.16E-01 |
| GO:0004864 | protein phosphatase inhibitor a  | MF | 7  | 3   | 562 | 42   | 19809 | 1.16E-01 |
| GO:0007605 | sensory perception of sound      | BP | 8  | 7   | 562 | 144  | 19809 | 1.16E-01 |
| GO:0050731 | positive regulation of peptidyl- | BP | 11 | 5   | 562 | 91   | 19809 | 1.17E-01 |
| GO:0008283 | cell population proliferation    | BP | 3  | 14  | 562 | 346  | 19809 | 1.17E-01 |
| GO:0030666 | endocytic vesicle membrane       | CC | 7  | 4   | 562 | 66   | 19809 | 1.18E-01 |
| GO:0048245 | eosinophil chemotaxis            | BP | 7  | 2   | 562 | 21   | 19809 | 1.18E-01 |
| GO:0001556 | oocyte maturation                | BP | 5  | 2   | 562 | 21   | 19809 | 1.18E-01 |
| GO:0050860 | negative regulation of T cell re | BP | 10 | 2   | 562 | 21   | 19809 | 1.18E-01 |
| GO:0043277 | apoptotic cell clearance         | BP | 8  | 2   | 562 | 21   | 19809 | 1.18E-01 |
| GO:0045821 | positive regulation of glycolyti | BP | 11 | 2   | 562 | 21   | 19809 | 1.18E-01 |
| GO:0036120 | cellular response to platelet-de | BP | 6  | 2   | 562 | 21   | 19809 | 1.18E-01 |
| GO:0021772 | olfactory bulb development       | BP | 5  | 2   | 562 | 21   | 19809 | 1.18E-01 |
| GO:0010033 | response to organic substance    | BP | 5  | 5   | 562 | 92   | 19809 | 1.21E-01 |
| GO:0060173 | limb development                 | BP | 6  | 3   | 562 | 43   | 19809 | 1.22E-01 |
| GO:0048705 | skeletal system morphogenesis    | BP | 6  | 3   | 562 | 43   | 19809 | 1.22E-01 |
| GO:0035094 | response to nicotine             | BP | 6  | 3   | 562 | 43   | 19809 | 1.22E-01 |
| GO:0030574 | collagen catabolic process       | BP | 5  | 3   | 562 | 43   | 19809 | 1.22E-01 |
| GO:0043524 | negative regulation of neuron a  | BP | 10 | 7   | 562 | 146  | 19809 | 1.22E-01 |
| GO:0007389 | pattern specification process    | BP | 4  | 4   | 562 | 67   | 19809 | 1.22E-01 |
| GO:0046872 | metal ion binding                | MF | 6  | 117 | 562 | 3735 | 19809 | 1.25E-01 |
| GO:0065003 | protein-containing complex as    | BP | 6  | 6   | 562 | 120  | 19809 | 1.26E-01 |
| GO:0051000 | positive regulation of nitric-ox | BP | 9  | 2   | 562 | 22   | 19809 | 1.28E-01 |
| GO:0005922 | connexin complex                 | CC | 6  | 2   | 562 | 22   | 19809 | 1.28E-01 |
| GO:0061640 | cytoskeleton-dependent cytoki    | BP | 6  | 2   | 562 | 22   | 19809 | 1.28E-01 |
| GO:0008361 | regulation of cell size          | BP | 6  | 2   | 562 | 22   | 19809 | 1.28E-01 |
| GO:0008045 | motor neuron axon guidance       | BP | 7  | 2   | 562 | 22   | 19809 | 1.28E-01 |
| GO:0010596 | negative regulation of endothe   | BP | 10 | 2   | 562 | 22   | 19809 | 1.28E-01 |
| GO:0004950 | chemokine receptor activity      | MF | 8  | 2   | 562 | 22   | 19809 | 1.28E-01 |
| GO:0016620 | oxidoreductase activity, acting  | MF | 6  | 2   | 562 | 22   | 19809 | 1.28E-01 |
| GO:0050806 | positive regulation of synaptic  | BP | 8  | 2   | 562 | 22   | 19809 | 1.28E-01 |
| GO:0030159 | receptor signaling complex sca   | MF | 7  | 2   | 562 | 22   | 19809 | 1.28E-01 |
| GO:0033627 | cell adhesion mediated by inte   | BP | 5  | 2   | 562 | 22   | 19809 | 1.28E-01 |
| GO:0042098 | T cell proliferation             | BP | 8  | 2   | 562 | 22   | 19809 | 1.28E-01 |
| GO:0071310 | cellular response to organic su  | BP | 6  | 3   | 562 | 44   | 19809 | 1.29E-01 |
| GO:0032570 | response to progesterone         | BP | 6  | 3   | 562 | 44   | 19809 | 1.29E-01 |
| GO:0019216 | regulation of lipid metabolic p  | BP | 7  | 5   | 562 | 94   | 19809 | 1.29E-01 |
| GO:0055037 | recycling endosome               | CC | 8  | 6   | 562 | 121  | 19809 | 1.30E-01 |
| GO:0007219 | Notch signaling pathway          | BP | 6  | 6   | 562 | 121  | 19809 | 1.30E-01 |
| GO:0090090 | negative regulation of canonic:  | BP | 10 | 8   | 562 | 177  | 19809 | 1.32E-01 |
| GO:0032092 | positive regulation of protein t | BP | 7  | 4   | 562 | 69   | 19809 | 1.32E-01 |
| GO:0050796 | regulation of insulin secretion  | BP | 10 | 4   | 562 | 69   | 19809 | 1.32E-01 |
| GO:0061844 | antimicrobial humoral immune     | BP | 7  | 4   | 562 | 69   | 19809 | 1.32E-01 |
| GO:0050830 | defense response to Gram-posi    | BP | 9  | 5   | 562 | 95   | 19809 | 1.33E-01 |
| GO:0022900 | electron transport chain         | BP | 6  | 5   | 562 | 95   | 19809 | 1.33E-01 |
| GO:0003824 | catalytic activity               | MF | 3  | 20  | 562 | 538  | 19809 | 1.34E-01 |
| GO:0098794 | postsynapse                      | CC | 4  | 6   | 562 | 122  | 19809 | 1.34E-01 |
| GO:0030414 | peptidase inhibitor activity     | MF | 6  | 6   | 562 | 122  | 19809 | 1.34E-01 |
| GO:0061737 | leukotriene signaling pathway    | BP | 6  | 1   | 562 | 5    | 19809 | 1.34E-01 |

|            |                                   |    |    |   |     |   |       |          |
|------------|-----------------------------------|----|----|---|-----|---|-------|----------|
| GO:0000064 | L-ornithine transmembrane tra     | MF | 7  | 1 | 562 | 5 | 19809 | 1.34E-01 |
| GO:1905007 | positive regulation of epithelia  | BP | 10 | 1 | 562 | 5 | 19809 | 1.34E-01 |
| GO:0048790 | maintenance of presynaptic ac     | BP | 7  | 1 | 562 | 5 | 19809 | 1.34E-01 |
| GO:0008582 | regulation of synaptic growth     | BP | 7  | 1 | 562 | 5 | 19809 | 1.34E-01 |
| GO:0002141 | stereocilia ankle link            | CC | 6  | 1 | 562 | 5 | 19809 | 1.34E-01 |
| GO:0030263 | apoptotic chromosome conden       | BP | 10 | 1 | 562 | 5 | 19809 | 1.34E-01 |
| GO:0006477 | protein sulfation                 | BP | 9  | 1 | 562 | 5 | 19809 | 1.34E-01 |
| GO:0015277 | kainate selective glutamate rec   | MF | 8  | 1 | 562 | 5 | 19809 | 1.34E-01 |
| GO:0006710 | androgen catabolic process        | BP | 8  | 1 | 562 | 5 | 19809 | 1.34E-01 |
| GO:1900028 | negative regulation of ruffle as  | BP | 10 | 1 | 562 | 5 | 19809 | 1.34E-01 |
| GO:0004668 | protein-arginine deiminase act    | MF | 7  | 1 | 562 | 5 | 19809 | 1.34E-01 |
| GO:0006670 | sphingosine metabolic process     | BP | 8  | 1 | 562 | 5 | 19809 | 1.34E-01 |
| GO:0071504 | cellular response to heparin      | BP | 7  | 1 | 562 | 5 | 19809 | 1.34E-01 |
| GO:0071547 | piP-body                          | CC | 9  | 1 | 562 | 5 | 19809 | 1.34E-01 |
| GO:0051023 | regulation of immunoglobulin      | BP | 9  | 1 | 562 | 5 | 19809 | 1.34E-01 |
| GO:0030896 | checkpoint clamp complex          | CC | 4  | 1 | 562 | 5 | 19809 | 1.34E-01 |
| GO:0060666 | dichotomous subdivision of ter    | BP | 8  | 1 | 562 | 5 | 19809 | 1.34E-01 |
| GO:0043243 | positive regulation of protein c  | BP | 8  | 1 | 562 | 5 | 19809 | 1.34E-01 |
| GO:0060011 | Sertoli cell proliferation        | BP | 4  | 1 | 562 | 5 | 19809 | 1.34E-01 |
| GO:0060171 | stereocilium membrane             | CC | 7  | 1 | 562 | 5 | 19809 | 1.34E-01 |
| GO:0002248 | connective tissue replacement     | BP | 6  | 1 | 562 | 5 | 19809 | 1.34E-01 |
| GO:0070569 | uridylyltransferase activity      | MF | 7  | 1 | 562 | 5 | 19809 | 1.34E-01 |
| GO:0060043 | regulation of cardiac muscle c    | BP | 7  | 1 | 562 | 5 | 19809 | 1.34E-01 |
| GO:0042490 | mechanoreceptor differentiat      | BP | 7  | 1 | 562 | 5 | 19809 | 1.34E-01 |
| GO:0042541 | hemoglobin biosynthetic proce     | BP | 8  | 1 | 562 | 5 | 19809 | 1.34E-01 |
| GO:1904036 | negative regulation of epitheli   | BP | 10 | 1 | 562 | 5 | 19809 | 1.34E-01 |
| GO:0001915 | negative regulation of T cell m   | BP | 8  | 1 | 562 | 5 | 19809 | 1.34E-01 |
| GO:0044194 | cytolytic granule                 | CC | 9  | 1 | 562 | 5 | 19809 | 1.34E-01 |
| GO:1903215 | negative regulation of protein t  | BP | 10 | 1 | 562 | 5 | 19809 | 1.34E-01 |
| GO:0033227 | dsRNA transport                   | BP | 10 | 1 | 562 | 5 | 19809 | 1.34E-01 |
| GO:0008296 | 3'-5'-exodeoxyribonuclease act    | MF | 9  | 1 | 562 | 5 | 19809 | 1.34E-01 |
| GO:0002740 | negative regulation of cytokine   | BP | 9  | 1 | 562 | 5 | 19809 | 1.34E-01 |
| GO:0022614 | membrane to membrane dockin       | BP | 5  | 1 | 562 | 5 | 19809 | 1.34E-01 |
| GO:0019318 | hexose metabolic process          | BP | 7  | 1 | 562 | 5 | 19809 | 1.34E-01 |
| GO:0002520 | immune system development         | BP | 4  | 1 | 562 | 5 | 19809 | 1.34E-01 |
| GO:0043570 | maintenance of DNA repeat el      | BP | 8  | 1 | 562 | 5 | 19809 | 1.34E-01 |
| GO:0032714 | negative regulation of interleul  | BP | 8  | 1 | 562 | 5 | 19809 | 1.34E-01 |
| GO:0005134 | interleukin-2 receptor binding    | MF | 7  | 1 | 562 | 5 | 19809 | 1.34E-01 |
| GO:0031802 | type 5 metabotropic glutamate     | MF | 8  | 1 | 562 | 5 | 19809 | 1.34E-01 |
| GO:0031228 | intrinsic component of Golgi n    | CC | 6  | 1 | 562 | 5 | 19809 | 1.34E-01 |
| GO:0008379 | thioredoxin peroxidase activity   | MF | 5  | 1 | 562 | 5 | 19809 | 1.34E-01 |
| GO:0060664 | epithelial cell proliferation inv | BP | 5  | 1 | 562 | 5 | 19809 | 1.34E-01 |
| GO:1903401 | L-lysine transmembrane transp     | BP | 8  | 1 | 562 | 5 | 19809 | 1.34E-01 |
| GO:0036006 | cellular response to macrophag    | BP | 8  | 1 | 562 | 5 | 19809 | 1.34E-01 |
| GO:0003161 | cardiac conduction system dev     | BP | 9  | 1 | 562 | 5 | 19809 | 1.34E-01 |
| GO:1990910 | response to hypobaric hypoxia     | BP | 6  | 1 | 562 | 5 | 19809 | 1.34E-01 |
| GO:0038156 | interleukin-3-mediated signalin   | BP | 7  | 1 | 562 | 5 | 19809 | 1.34E-01 |
| GO:1904428 | negative regulation of tubulin    | BP | 10 | 1 | 562 | 5 | 19809 | 1.34E-01 |
| GO:0044241 | lipid digestion                   | BP | 5  | 1 | 562 | 5 | 19809 | 1.34E-01 |
| GO:0046813 | receptor-mediated virion attac    | BP | 7  | 1 | 562 | 5 | 19809 | 1.34E-01 |



|            |                                  |    |    |   |     |   |       |          |
|------------|----------------------------------|----|----|---|-----|---|-------|----------|
| GO:0016212 | kynurenine-oxoglutarate trans    | MF | 8  | 1 | 562 | 5 | 19809 | 1.34E-01 |
| GO:0048006 | antigen processing and present   | BP | 6  | 1 | 562 | 5 | 19809 | 1.34E-01 |
| GO:0030321 | transepithelial chloride transp  | BP | 10 | 1 | 562 | 5 | 19809 | 1.34E-01 |
| GO:2001044 | regulation of integrin-mediatec  | BP | 8  | 1 | 562 | 5 | 19809 | 1.34E-01 |
| GO:0097368 | establishment of Sertoli cell b  | BP | 8  | 1 | 562 | 5 | 19809 | 1.34E-01 |
| GO:0010656 | negative regulation of muscle c  | BP | 10 | 1 | 562 | 5 | 19809 | 1.34E-01 |
| GO:0030884 | exogenous lipid antigen bindin   | MF | 6  | 1 | 562 | 5 | 19809 | 1.34E-01 |
| GO:0021650 | vestibulocochlear nerve forma    | BP | 6  | 1 | 562 | 5 | 19809 | 1.34E-01 |
| GO:0070293 | renal absorpition                | BP | 6  | 1 | 562 | 5 | 19809 | 1.34E-01 |
| GO:1903307 | positive regulation of regulatec | BP | 9  | 1 | 562 | 5 | 19809 | 1.34E-01 |
| GO:1990726 | Lsm1-7-Pat1 complex              | CC | 5  | 1 | 562 | 5 | 19809 | 1.34E-01 |
| GO:1903721 | positive regulation of I-kappaE  | BP | 11 | 1 | 562 | 5 | 19809 | 1.34E-01 |
| GO:0000018 | regulation of DNA recombinat     | BP | 9  | 1 | 562 | 5 | 19809 | 1.34E-01 |
| GO:0045578 | negative regulation of B cell di | BP | 10 | 1 | 562 | 5 | 19809 | 1.34E-01 |
| GO:0004096 | catalase activity                | MF | 5  | 1 | 562 | 5 | 19809 | 1.34E-01 |
| GO:0043111 | replication fork arrest          | BP | 9  | 1 | 562 | 5 | 19809 | 1.34E-01 |
| GO:0051546 | keratinocyte migration           | BP | 9  | 1 | 562 | 5 | 19809 | 1.34E-01 |
| GO:0045607 | regulation of inner ear auditory | BP | 9  | 1 | 562 | 5 | 19809 | 1.34E-01 |
| GO:2001181 | positive regulation of interleuk | BP | 9  | 1 | 562 | 5 | 19809 | 1.34E-01 |
| GO:0018812 | 3-hydroxyacyl-CoA dehydrata      | MF | 7  | 1 | 562 | 5 | 19809 | 1.34E-01 |
| GO:0071224 | cellular response to peptidogly  | BP | 8  | 1 | 562 | 5 | 19809 | 1.34E-01 |
| GO:0070083 | clathrin-sculpted monoamine t    | CC | 8  | 1 | 562 | 5 | 19809 | 1.34E-01 |
| GO:0010988 | regulation of low-density lipop  | BP | 7  | 1 | 562 | 5 | 19809 | 1.34E-01 |
| GO:0051464 | positive regulation of cortisol  | BP | 12 | 1 | 562 | 5 | 19809 | 1.34E-01 |
| GO:0010961 | cellular magnesium ion homeo     | BP | 11 | 1 | 562 | 5 | 19809 | 1.34E-01 |
| GO:0045794 | negative regulation of cell volu | BP | 8  | 1 | 562 | 5 | 19809 | 1.34E-01 |
| GO:0031622 | positive regulation of fever gen | BP | 11 | 1 | 562 | 5 | 19809 | 1.34E-01 |
| GO:0006526 | arginine biosynthetic process    | BP | 12 | 1 | 562 | 5 | 19809 | 1.34E-01 |
| GO:1990349 | gap junction-mediated intercel   | BP | 7  | 1 | 562 | 5 | 19809 | 1.34E-01 |
| GO:0045321 | leukocyte activation             | BP | 5  | 1 | 562 | 5 | 19809 | 1.34E-01 |
| GO:0055129 | L-proline biosynthetic process   | BP | 13 | 1 | 562 | 5 | 19809 | 1.34E-01 |
| GO:0032983 | kainate selective glutamate rec  | CC | 8  | 1 | 562 | 5 | 19809 | 1.34E-01 |
| GO:0060050 | positive regulation of protein g | BP | 10 | 1 | 562 | 5 | 19809 | 1.34E-01 |
| GO:0035696 | monocyte extravasation           | BP | 6  | 1 | 562 | 5 | 19809 | 1.34E-01 |
| GO:0019960 | C-X3-C chemokine binding         | MF | 7  | 1 | 562 | 5 | 19809 | 1.34E-01 |
| GO:0070189 | kynurenine metabolic process     | BP | 6  | 1 | 562 | 5 | 19809 | 1.34E-01 |
| GO:0019815 | B cell receptor complex          | CC | 5  | 1 | 562 | 5 | 19809 | 1.34E-01 |
| GO:0003357 | noradrenergic neuron different   | BP | 7  | 1 | 562 | 5 | 19809 | 1.34E-01 |
| GO:0102121 | ceramidase activity              | MF | 7  | 1 | 562 | 5 | 19809 | 1.34E-01 |
| GO:0010463 | mesenchymal cell proliferatio    | BP | 4  | 1 | 562 | 5 | 19809 | 1.34E-01 |
| GO:0097350 | neutrophil clearance             | BP | 5  | 1 | 562 | 5 | 19809 | 1.34E-01 |
| GO:0051900 | regulation of mitochondrial de   | BP | 7  | 1 | 562 | 5 | 19809 | 1.34E-01 |
| GO:0003289 | atrial septum primum morphog     | BP | 7  | 1 | 562 | 5 | 19809 | 1.34E-01 |
| GO:0031547 | brain-derived neurotrophic fac   | BP | 8  | 1 | 562 | 5 | 19809 | 1.34E-01 |
| GO:0097070 | ductus arteriosus closure        | BP | 8  | 1 | 562 | 5 | 19809 | 1.34E-01 |
| GO:0001851 | complement component C3b b       | MF | 6  | 1 | 562 | 5 | 19809 | 1.34E-01 |
| GO:0045716 | positive regulation of low-dens  | BP | 10 | 1 | 562 | 5 | 19809 | 1.34E-01 |
| GO:0018101 | protein citrullination           | BP | 11 | 1 | 562 | 5 | 19809 | 1.34E-01 |
| GO:0032611 | interleukin-1 beta production    | BP | 6  | 1 | 562 | 5 | 19809 | 1.34E-01 |
| GO:0043615 | astrocyte cell migration         | BP | 8  | 1 | 562 | 5 | 19809 | 1.34E-01 |

|            |                                   |    |    |   |     |   |       |          |
|------------|-----------------------------------|----|----|---|-----|---|-------|----------|
| GO:0071799 | cellular response to prostaglan   | BP | 8  | 1 | 562 | 5 | 19809 | 1.34E-01 |
| GO:1904141 | positive regulation of microgli   | BP | 12 | 1 | 562 | 5 | 19809 | 1.34E-01 |
| GO:0043533 | inositol 1,3,4,5 tetrakisphosph   | MF | 6  | 1 | 562 | 5 | 19809 | 1.34E-01 |
| GO:0014905 | myoblast fusion involved in sk    | BP | 7  | 1 | 562 | 5 | 19809 | 1.34E-01 |
| GO:0021544 | subpallium development            | BP | 5  | 1 | 562 | 5 | 19809 | 1.34E-01 |
| GO:0031727 | CCR2 chemokine receptor bin       | MF | 9  | 1 | 562 | 5 | 19809 | 1.34E-01 |
| GO:0048406 | nerve growth factor binding       | MF | 7  | 1 | 562 | 5 | 19809 | 1.34E-01 |
| GO:0070345 | negative regulation of fat cell i | BP | 8  | 1 | 562 | 5 | 19809 | 1.34E-01 |
| GO:0006547 | histidine metabolic process       | BP | 10 | 1 | 562 | 5 | 19809 | 1.34E-01 |
| GO:0017038 | protein import                    | BP | 10 | 1 | 562 | 5 | 19809 | 1.34E-01 |
| GO:0046934 | phosphatidylinositol-4,5-bisph    | MF | 8  | 1 | 562 | 5 | 19809 | 1.34E-01 |
| GO:0060406 | positive regulation of penile er  | BP | 7  | 1 | 562 | 5 | 19809 | 1.34E-01 |
| GO:0006824 | cobalt ion transport              | BP | 10 | 1 | 562 | 5 | 19809 | 1.34E-01 |
| GO:0098639 | collagen binding involved in c    | MF | 6  | 1 | 562 | 5 | 19809 | 1.34E-01 |
| GO:0048570 | notochord morphogenesis           | BP | 7  | 1 | 562 | 5 | 19809 | 1.34E-01 |
| GO:2001301 | lipoxin biosynthetic process      | BP | 12 | 1 | 562 | 5 | 19809 | 1.34E-01 |
| GO:0019863 | IgE binding                       | MF | 6  | 1 | 562 | 5 | 19809 | 1.34E-01 |
| GO:0030091 | protein repair                    | BP | 8  | 1 | 562 | 5 | 19809 | 1.34E-01 |
| GO:2000556 | positive regulation of T-helper   | BP | 12 | 1 | 562 | 5 | 19809 | 1.34E-01 |
| GO:0030156 | benzodiazepine receptor bindin    | MF | 6  | 1 | 562 | 5 | 19809 | 1.34E-01 |
| GO:0014042 | positive regulation of neuron n   | BP | 11 | 1 | 562 | 5 | 19809 | 1.34E-01 |
| GO:0005534 | galactose binding                 | MF | 6  | 1 | 562 | 5 | 19809 | 1.34E-01 |
| GO:0036414 | histone citrullination            | BP | 10 | 1 | 562 | 5 | 19809 | 1.34E-01 |
| GO:0051222 | positive regulation of protein t  | BP | 7  | 1 | 562 | 5 | 19809 | 1.34E-01 |
| GO:0019441 | tryptophan catabolic process t    | BP | 12 | 1 | 562 | 5 | 19809 | 1.34E-01 |
| GO:1901203 | positive regulation of extracell  | BP | 7  | 1 | 562 | 5 | 19809 | 1.34E-01 |
| GO:0038163 | thrombopoietin-mediated signa     | BP | 8  | 1 | 562 | 5 | 19809 | 1.34E-01 |
| GO:0034711 | inhibin binding                   | MF | 5  | 1 | 562 | 5 | 19809 | 1.34E-01 |
| GO:0042270 | protection from natural killer c  | BP | 9  | 1 | 562 | 5 | 19809 | 1.34E-01 |
| GO:0070290 | N-acylphosphatidylethanolami      | MF | 8  | 1 | 562 | 5 | 19809 | 1.34E-01 |
| GO:0030858 | positive regulation of epithelia  | BP | 8  | 1 | 562 | 5 | 19809 | 1.34E-01 |
| GO:0001740 | Barr body                         | CC | 8  | 1 | 562 | 5 | 19809 | 1.34E-01 |
| GO:0007356 | thorax and anterior abdomen d     | BP | 7  | 1 | 562 | 5 | 19809 | 1.34E-01 |
| GO:0032143 | single thymine insertion bindir   | MF | 11 | 1 | 562 | 5 | 19809 | 1.34E-01 |
| GO:0002666 | positive regulation of T cell to  | BP | 8  | 1 | 562 | 5 | 19809 | 1.34E-01 |
| GO:0050951 | sensory perception of temperat    | BP | 7  | 1 | 562 | 5 | 19809 | 1.34E-01 |
| GO:0032534 | regulation of microvillus assen   | BP | 10 | 1 | 562 | 5 | 19809 | 1.34E-01 |
| GO:0006101 | citrate metabolic process         | BP | 7  | 1 | 562 | 5 | 19809 | 1.34E-01 |
| GO:0031013 | troponin I binding                | MF | 6  | 1 | 562 | 5 | 19809 | 1.34E-01 |
| GO:2000660 | negative regulation of interleul  | BP | 10 | 1 | 562 | 5 | 19809 | 1.34E-01 |
| GO:1903347 | negative regulation of bicellula  | BP | 9  | 1 | 562 | 5 | 19809 | 1.34E-01 |
| GO:0006220 | pyrimidine nucleotide metabol     | BP | 9  | 1 | 562 | 5 | 19809 | 1.34E-01 |
| GO:0001405 | PAM complex, Tim23 associat       | CC | 8  | 1 | 562 | 5 | 19809 | 1.34E-01 |
| GO:0030035 | microspike assembly               | BP | 8  | 1 | 562 | 5 | 19809 | 1.34E-01 |
| GO:2000343 | positive regulation of chemoki    | BP | 9  | 1 | 562 | 5 | 19809 | 1.34E-01 |
| GO:0070231 | T cell apoptotic process          | BP | 9  | 1 | 562 | 5 | 19809 | 1.34E-01 |
| GO:0030883 | endogenous lipid antigen bindi    | MF | 6  | 1 | 562 | 5 | 19809 | 1.34E-01 |
| GO:0016202 | regulation of striated muscle ti  | BP | 8  | 1 | 562 | 5 | 19809 | 1.34E-01 |
| GO:0060485 | mesenchyme development            | BP | 6  | 1 | 562 | 5 | 19809 | 1.34E-01 |
| GO:0006290 | pyrimidine dimer repair           | BP | 9  | 1 | 562 | 5 | 19809 | 1.34E-01 |

|            |                                  |    |    |    |     |      |       |          |
|------------|----------------------------------|----|----|----|-----|------|-------|----------|
| GO:0030881 | beta-2-microglobulin binding     | MF | 5  | 1  | 562 | 5    | 19809 | 1.34E-01 |
| GO:2000405 | negative regulation of T cell m  | BP | 9  | 1  | 562 | 5    | 19809 | 1.34E-01 |
| GO:0035509 | negative regulation of myosin-   | BP | 13 | 1  | 562 | 5    | 19809 | 1.34E-01 |
| GO:0030618 | transforming growth factor bet   | MF | 5  | 1  | 562 | 5    | 19809 | 1.34E-01 |
| GO:0015936 | coenzyme A metabolic process     | BP | 7  | 1  | 562 | 5    | 19809 | 1.34E-01 |
| GO:0010715 | regulation of extracellular mat  | BP | 8  | 1  | 562 | 5    | 19809 | 1.34E-01 |
| GO:0015809 | arginine transport               | BP | 8  | 1  | 562 | 5    | 19809 | 1.34E-01 |
| GO:1990511 | piRNA biosynthetic process       | BP | 11 | 1  | 562 | 5    | 19809 | 1.34E-01 |
| GO:0004957 | prostaglandin E receptor activi  | MF | 10 | 1  | 562 | 5    | 19809 | 1.34E-01 |
| GO:0009408 | response to heat                 | BP | 5  | 3  | 562 | 45   | 19809 | 1.35E-01 |
| GO:0008144 | drug binding                     | MF | 4  | 4  | 562 | 70   | 19809 | 1.37E-01 |
| GO:0007224 | smoothened signaling pathway     | BP | 6  | 4  | 562 | 70   | 19809 | 1.37E-01 |
| GO:0044305 | calyx of Held                    | CC | 7  | 2  | 562 | 23   | 19809 | 1.38E-01 |
| GO:0016493 | C-C chemokine receptor activi    | MF | 9  | 2  | 562 | 23   | 19809 | 1.38E-01 |
| GO:0008483 | transaminase activity            | MF | 6  | 2  | 562 | 23   | 19809 | 1.38E-01 |
| GO:0048872 | homeostasis of number of cells   | BP | 6  | 2  | 562 | 23   | 19809 | 1.38E-01 |
| GO:0006730 | one-carbon metabolic process     | BP | 5  | 2  | 562 | 23   | 19809 | 1.38E-01 |
| GO:0001965 | G-protein alpha-subunit bindin   | MF | 5  | 2  | 562 | 23   | 19809 | 1.38E-01 |
| GO:0001892 | embryonic placenta developme     | BP | 5  | 2  | 562 | 23   | 19809 | 1.38E-01 |
| GO:0042759 | long-chain fatty acid biosynthe  | BP | 11 | 2  | 562 | 23   | 19809 | 1.38E-01 |
| GO:0001671 | ATPase activator activity        | MF | 6  | 2  | 562 | 23   | 19809 | 1.38E-01 |
| GO:0006342 | chromatin silencing              | BP | 5  | 2  | 562 | 23   | 19809 | 1.38E-01 |
| GO:0030742 | GTP-dependent protein bindin     | MF | 5  | 2  | 562 | 23   | 19809 | 1.38E-01 |
| GO:0043280 | positive regulation of cysteine- | BP | 10 | 3  | 562 | 46   | 19809 | 1.42E-01 |
| GO:0050714 | positive regulation of protein s | BP | 10 | 3  | 562 | 46   | 19809 | 1.42E-01 |
| GO:0060048 | cardiac muscle contraction       | BP | 8  | 3  | 562 | 46   | 19809 | 1.42E-01 |
| GO:0045786 | negative regulation of cell cycl | BP | 7  | 3  | 562 | 46   | 19809 | 1.42E-01 |
| GO:0007565 | female pregnancy                 | BP | 5  | 5  | 562 | 97   | 19809 | 1.42E-01 |
| GO:0120162 | positive regulation of cold-ind  | BP | 7  | 5  | 562 | 97   | 19809 | 1.42E-01 |
| GO:0007165 | signal transduction              | BP | 4  | 61 | 562 | 1874 | 19809 | 1.42E-01 |
| GO:0031490 | chromatin DNA binding            | MF | 7  | 4  | 562 | 71   | 19809 | 1.43E-01 |
| GO:0003924 | GTPase activity                  | MF | 9  | 13 | 562 | 328  | 19809 | 1.43E-01 |
| GO:0005788 | endoplasmic reticulum lumen      | CC | 7  | 12 | 562 | 298  | 19809 | 1.43E-01 |
| GO:0010629 | negative regulation of gene exj  | BP | 8  | 11 | 562 | 269  | 19809 | 1.45E-01 |
| GO:0007204 | positive regulation of cytosolic | BP | 13 | 7  | 562 | 153  | 19809 | 1.45E-01 |
| GO:1990830 | cellular response to leukemia i  | BP | 8  | 5  | 562 | 98   | 19809 | 1.46E-01 |
| GO:0008134 | transcription factor binding     | MF | 5  | 14 | 562 | 360  | 19809 | 1.46E-01 |
| GO:0034341 | response to interferon-gamma     | BP | 7  | 2  | 562 | 24   | 19809 | 1.47E-01 |
| GO:0008378 | galactosyltransferase activity   | MF | 7  | 2  | 562 | 24   | 19809 | 1.47E-01 |
| GO:0050870 | positive regulation of T cell ac | BP | 9  | 2  | 562 | 24   | 19809 | 1.47E-01 |
| GO:0032418 | lysosome localization            | BP | 6  | 2  | 562 | 24   | 19809 | 1.47E-01 |
| GO:0008023 | transcription elongation factor  | CC | 4  | 2  | 562 | 24   | 19809 | 1.47E-01 |
| GO:0006884 | cell volume homeostasis          | BP | 7  | 2  | 562 | 24   | 19809 | 1.47E-01 |
| GO:0000137 | Golgi cis cisterna               | CC | 8  | 2  | 562 | 24   | 19809 | 1.47E-01 |
| GO:0001891 | phagocytic cup                   | CC | 5  | 2  | 562 | 24   | 19809 | 1.47E-01 |
| GO:0019957 | C-C chemokine binding            | MF | 7  | 2  | 562 | 24   | 19809 | 1.47E-01 |
| GO:0007141 | male meiosis I                   | BP | 8  | 2  | 562 | 24   | 19809 | 1.47E-01 |
| GO:0071556 | integral component of lumenal    | CC | 8  | 2  | 562 | 24   | 19809 | 1.47E-01 |
| GO:0045921 | positive regulation of exocytos  | BP | 8  | 2  | 562 | 24   | 19809 | 1.47E-01 |
| GO:0021766 | hippocampus development          | BP | 5  | 4  | 562 | 72   | 19809 | 1.48E-01 |

|            |                                   |    |    |    |     |      |       |          |
|------------|-----------------------------------|----|----|----|-----|------|-------|----------|
| GO:0030218 | erythrocyte differentiation       | BP | 7  | 3  | 562 | 47   | 19809 | 1.48E-01 |
| GO:0043536 | positive regulation of blood ve   | BP | 11 | 3  | 562 | 47   | 19809 | 1.48E-01 |
| GO:0007154 | cell communication                | BP | 4  | 3  | 562 | 47   | 19809 | 1.48E-01 |
| GO:0032420 | stereocilium                      | CC | 6  | 3  | 562 | 47   | 19809 | 1.48E-01 |
| GO:0048538 | thymus development                | BP | 7  | 3  | 562 | 47   | 19809 | 1.48E-01 |
| GO:0008138 | protein tyrosine/serine/threoni   | MF | 9  | 3  | 562 | 47   | 19809 | 1.48E-01 |
| GO:0021915 | neural tube development           | BP | 6  | 3  | 562 | 47   | 19809 | 1.48E-01 |
| GO:0090305 | nucleic acid phosphodiester bc    | BP | 8  | 6  | 562 | 126  | 19809 | 1.49E-01 |
| GO:0005856 | cytoskeleton                      | CC | 6  | 44 | 562 | 1320 | 19809 | 1.50E-01 |
| GO:0001501 | skeletal system development       | BP | 6  | 7  | 562 | 155  | 19809 | 1.52E-01 |
| GO:0001938 | positive regulation of endothel   | BP | 9  | 4  | 562 | 73   | 19809 | 1.53E-01 |
| GO:0010862 | positive regulation of pathway    | BP | 11 | 3  | 562 | 48   | 19809 | 1.55E-01 |
| GO:0006635 | fatty acid beta-oxidation         | BP | 11 | 3  | 562 | 48   | 19809 | 1.55E-01 |
| GO:0043666 | regulation of phosphoprotein p    | BP | 11 | 3  | 562 | 48   | 19809 | 1.55E-01 |
| GO:0030182 | neuron differentiation            | BP | 6  | 7  | 562 | 156  | 19809 | 1.56E-01 |
| GO:0001158 | enhancer sequence-specific DN     | MF | 9  | 2  | 562 | 25   | 19809 | 1.57E-01 |
| GO:0035307 | positive regulation of protein c  | BP | 10 | 2  | 562 | 25   | 19809 | 1.57E-01 |
| GO:2000353 | positive regulation of endothel   | BP | 11 | 2  | 562 | 25   | 19809 | 1.57E-01 |
| GO:0030099 | myeloid cell differentiation      | BP | 6  | 2  | 562 | 25   | 19809 | 1.57E-01 |
| GO:2001243 | negative regulation of intrinsic  | BP | 10 | 2  | 562 | 25   | 19809 | 1.57E-01 |
| GO:0019956 | chemokine binding                 | MF | 6  | 2  | 562 | 25   | 19809 | 1.57E-01 |
| GO:0002053 | positive regulation of mesench    | BP | 8  | 2  | 562 | 25   | 19809 | 1.57E-01 |
| GO:0060135 | maternal process involved in fi   | BP | 5  | 2  | 562 | 25   | 19809 | 1.57E-01 |
| GO:0008376 | acetylgalactosaminyltransferas    | MF | 7  | 2  | 562 | 25   | 19809 | 1.57E-01 |
| GO:0043425 | bHLH transcription factor binc    | MF | 7  | 2  | 562 | 25   | 19809 | 1.57E-01 |
| GO:0045332 | phospholipid translocation        | BP | 9  | 2  | 562 | 25   | 19809 | 1.57E-01 |
| GO:0005504 | fatty acid binding                | MF | 5  | 2  | 562 | 25   | 19809 | 1.57E-01 |
| GO:0008375 | acetylglucosaminyltransferase     | MF | 7  | 2  | 562 | 25   | 19809 | 1.57E-01 |
| GO:0032868 | response to insulin               | BP | 7  | 4  | 562 | 74   | 19809 | 1.58E-01 |
| GO:0002322 | B cell proliferation involved ir  | BP | 9  | 1  | 562 | 6    | 19809 | 1.59E-01 |
| GO:0042423 | catecholamine biosynthetic pro    | BP | 9  | 1  | 562 | 6    | 19809 | 1.59E-01 |
| GO:0090238 | positive regulation of arachido   | BP | 10 | 1  | 562 | 6    | 19809 | 1.59E-01 |
| GO:0004771 | sterol esterase activity          | MF | 7  | 1  | 562 | 6    | 19809 | 1.59E-01 |
| GO:0072540 | T-helper 17 cell lineage comm     | BP | 10 | 1  | 562 | 6    | 19809 | 1.59E-01 |
| GO:0046931 | pore complex assembly             | BP | 7  | 1  | 562 | 6    | 19809 | 1.59E-01 |
| GO:0044245 | polysaccharide digestion          | BP | 5  | 1  | 562 | 6    | 19809 | 1.59E-01 |
| GO:0004551 | nucleotide diphosphatase activ    | MF | 8  | 1  | 562 | 6    | 19809 | 1.59E-01 |
| GO:0036041 | long-chain fatty acid binding     | MF | 6  | 1  | 562 | 6    | 19809 | 1.59E-01 |
| GO:0046881 | positive regulation of follicle-s | BP | 10 | 1  | 562 | 6    | 19809 | 1.59E-01 |
| GO:1900122 | positive regulation of receptor   | BP | 8  | 1  | 562 | 6    | 19809 | 1.59E-01 |
| GO:0033278 | cell proliferation in midbrain    | BP | 5  | 1  | 562 | 6    | 19809 | 1.59E-01 |
| GO:1901018 | positive regulation of potassiu   | BP | 8  | 1  | 562 | 6    | 19809 | 1.59E-01 |
| GO:0032137 | guanine/thymine mispair bindi     | MF | 9  | 1  | 562 | 6    | 19809 | 1.59E-01 |
| GO:0047086 | ketosteroid monooxygenase ac      | MF | 7  | 1  | 562 | 6    | 19809 | 1.59E-01 |
| GO:0042976 | activation of Janus kinase activ  | BP | 11 | 1  | 562 | 6    | 19809 | 1.59E-01 |
| GO:0005587 | collagen type IV trimer           | CC | 6  | 1  | 562 | 6    | 19809 | 1.59E-01 |
| GO:0008310 | single-stranded DNA 3'-5' exo     | MF | 10 | 1  | 562 | 6    | 19809 | 1.59E-01 |
| GO:0042471 | ear morphogenesis                 | BP | 7  | 1  | 562 | 6    | 19809 | 1.59E-01 |
| GO:0017040 | N-acylsphingosine amidohydr       | MF | 7  | 1  | 562 | 6    | 19809 | 1.59E-01 |
| GO:1903140 | regulation of establishment of    | BP | 10 | 1  | 562 | 6    | 19809 | 1.59E-01 |

|            |                                   |    |    |   |     |   |       |          |
|------------|-----------------------------------|----|----|---|-----|---|-------|----------|
| GO:0070309 | lens fiber cell morphogenesis     | BP | 8  | 1 | 562 | 6 | 19809 | 1.59E-01 |
| GO:0006531 | aspartate metabolic process       | BP | 11 | 1 | 562 | 6 | 19809 | 1.59E-01 |
| GO:1903862 | positive regulation of oxidative  | BP | 11 | 1 | 562 | 6 | 19809 | 1.59E-01 |
| GO:1901727 | positive regulation of histone c  | BP | 12 | 1 | 562 | 6 | 19809 | 1.59E-01 |
| GO:0060179 | male mating behavior              | BP | 6  | 1 | 562 | 6 | 19809 | 1.59E-01 |
| GO:0014031 | mesenchymal cell developmen       | BP | 6  | 1 | 562 | 6 | 19809 | 1.59E-01 |
| GO:0047631 | ADP-ribose diphosphatase acti     | MF | 8  | 1 | 562 | 6 | 19809 | 1.59E-01 |
| GO:0010754 | negative regulation of cGMP-r     | BP | 10 | 1 | 562 | 6 | 19809 | 1.59E-01 |
| GO:0046533 | negative regulation of photorec   | BP | 11 | 1 | 562 | 6 | 19809 | 1.59E-01 |
| GO:0050672 | negative regulation of lymphoc    | BP | 10 | 1 | 562 | 6 | 19809 | 1.59E-01 |
| GO:0042487 | regulation of odontogenesis of    | BP | 9  | 1 | 562 | 6 | 19809 | 1.59E-01 |
| GO:0072719 | cellular response to cisplatin    | BP | 7  | 1 | 562 | 6 | 19809 | 1.59E-01 |
| GO:0060478 | acrosomal vesicle exocytosis      | BP | 10 | 1 | 562 | 6 | 19809 | 1.59E-01 |
| GO:0060341 | regulation of cellular localizati | BP | 6  | 1 | 562 | 6 | 19809 | 1.59E-01 |
| GO:0051702 | interaction with symbiont         | BP | 5  | 1 | 562 | 6 | 19809 | 1.59E-01 |
| GO:0097485 | neuron projection guidance        | BP | 5  | 1 | 562 | 6 | 19809 | 1.59E-01 |
| GO:0050917 | sensory perception of umami t     | BP | 9  | 1 | 562 | 6 | 19809 | 1.59E-01 |
| GO:0002142 | stereocilia ankle link complex    | CC | 4  | 1 | 562 | 6 | 19809 | 1.59E-01 |
| GO:0002138 | retinoic acid biosynthetic proc   | BP | 11 | 1 | 562 | 6 | 19809 | 1.59E-01 |
| GO:0006269 | DNA replication, synthesis of     | BP | 8  | 1 | 562 | 6 | 19809 | 1.59E-01 |
| GO:0032488 | Cdc42 protein signal transduct    | BP | 9  | 1 | 562 | 6 | 19809 | 1.59E-01 |
| GO:0007144 | female meiosis I                  | BP | 8  | 1 | 562 | 6 | 19809 | 1.59E-01 |
| GO:0042608 | T cell receptor binding           | MF | 6  | 1 | 562 | 6 | 19809 | 1.59E-01 |
| GO:0030578 | PML body organization             | BP | 8  | 1 | 562 | 6 | 19809 | 1.59E-01 |
| GO:1900454 | positive regulation of long-term  | BP | 6  | 1 | 562 | 6 | 19809 | 1.59E-01 |
| GO:0010040 | response to iron(II) ion          | BP | 8  | 1 | 562 | 6 | 19809 | 1.59E-01 |
| GO:0002830 | positive regulation of type 2 in  | BP | 8  | 1 | 562 | 6 | 19809 | 1.59E-01 |
| GO:0048261 | negative regulation of receptor   | BP | 9  | 1 | 562 | 6 | 19809 | 1.59E-01 |
| GO:2001141 | regulation of RNA biosynthesi     | BP | 8  | 1 | 562 | 6 | 19809 | 1.59E-01 |
| GO:0010807 | regulation of synaptic vesicle f  | BP | 7  | 1 | 562 | 6 | 19809 | 1.59E-01 |
| GO:0008131 | primary amine oxidase activity    | MF | 7  | 1 | 562 | 6 | 19809 | 1.59E-01 |
| GO:2000404 | regulation of T cell migration    | BP | 8  | 1 | 562 | 6 | 19809 | 1.59E-01 |
| GO:0003015 | heart process                     | BP | 6  | 1 | 562 | 6 | 19809 | 1.59E-01 |
| GO:0007007 | inner mitochondrial membrane      | BP | 8  | 1 | 562 | 6 | 19809 | 1.59E-01 |
| GO:2000647 | negative regulation of stem cel   | BP | 8  | 1 | 562 | 6 | 19809 | 1.59E-01 |
| GO:0060022 | hard palate development           | BP | 5  | 1 | 562 | 6 | 19809 | 1.59E-01 |
| GO:0004528 | phosphodiesterase I activity      | MF | 8  | 1 | 562 | 6 | 19809 | 1.59E-01 |
| GO:0010310 | regulation of hydrogen peroxid    | BP | 8  | 1 | 562 | 6 | 19809 | 1.59E-01 |
| GO:1901164 | negative regulation of trophobl   | BP | 9  | 1 | 562 | 6 | 19809 | 1.59E-01 |
| GO:0055131 | C3HC4-type RING finger dom        | MF | 6  | 1 | 562 | 6 | 19809 | 1.59E-01 |
| GO:0010659 | cardiac muscle cell apoptotic p   | BP | 9  | 1 | 562 | 6 | 19809 | 1.59E-01 |
| GO:0050916 | sensory perception of sweet tas   | BP | 9  | 1 | 562 | 6 | 19809 | 1.59E-01 |
| GO:0015288 | porin activity                    | MF | 8  | 1 | 562 | 6 | 19809 | 1.59E-01 |
| GO:0050913 | sensory perception of bitter tas  | BP | 9  | 1 | 562 | 6 | 19809 | 1.59E-01 |
| GO:0018027 | peptidyl-lysine dimethylation     | BP | 12 | 1 | 562 | 6 | 19809 | 1.59E-01 |
| GO:0009143 | nucleoside triphosphate catabo    | BP | 9  | 1 | 562 | 6 | 19809 | 1.59E-01 |
| GO:0098712 | L-glutamate import across plas    | BP | 7  | 1 | 562 | 6 | 19809 | 1.59E-01 |
| GO:1904929 | coreceptor activity involved in   | MF | 7  | 1 | 562 | 6 | 19809 | 1.59E-01 |
| GO:0006552 | leucine catabolic process         | BP | 11 | 1 | 562 | 6 | 19809 | 1.59E-01 |
| GO:0055102 | lipase inhibitor activity         | MF | 6  | 1 | 562 | 6 | 19809 | 1.59E-01 |

|            |                                           |    |    |   |     |   |       |          |
|------------|-------------------------------------------|----|----|---|-----|---|-------|----------|
| GO:0060706 | cell differentiation involved in          | BP | 5  | 1 | 562 | 6 | 19809 | 1.59E-01 |
| GO:0043305 | negative regulation of mast cel           | BP | 10 | 1 | 562 | 6 | 19809 | 1.59E-01 |
| GO:0019464 | glycine decarboxylation via gl            | BP | 13 | 1 | 562 | 6 | 19809 | 1.59E-01 |
| GO:1903038 | negative regulation of leukocy            | BP | 8  | 1 | 562 | 6 | 19809 | 1.59E-01 |
| GO:0060228 | phosphatidylcholine-sterol O- $\alpha$    | MF | 6  | 1 | 562 | 6 | 19809 | 1.59E-01 |
| GO:0032020 | ISG15-protein conjugation                 | BP | 9  | 1 | 562 | 6 | 19809 | 1.59E-01 |
| GO:0000320 | re-entry into mitotic cell cycle          | BP | 5  | 1 | 562 | 6 | 19809 | 1.59E-01 |
| GO:0061304 | retinal blood vessel morphogen            | BP | 7  | 1 | 562 | 6 | 19809 | 1.59E-01 |
| GO:0042743 | hydrogen peroxide metabolic p             | BP | 7  | 1 | 562 | 6 | 19809 | 1.59E-01 |
| GO:0097136 | Bcl-2 family protein complex              | CC | 4  | 1 | 562 | 6 | 19809 | 1.59E-01 |
| GO:0034354 | 'de novo' NAD biosynthetic pr             | BP | 11 | 1 | 562 | 6 | 19809 | 1.59E-01 |
| GO:0060628 | regulation of ER to Golgi vesic           | BP | 8  | 1 | 562 | 6 | 19809 | 1.59E-01 |
| GO:0002318 | myeloid progenitor cell differe           | BP | 7  | 1 | 562 | 6 | 19809 | 1.59E-01 |
| GO:0034698 | response to gonadotropin                  | BP | 6  | 1 | 562 | 6 | 19809 | 1.59E-01 |
| GO:0072675 | osteoclast fusion                         | BP | 6  | 1 | 562 | 6 | 19809 | 1.59E-01 |
| GO:0061299 | retina vasculature morphogene             | BP | 5  | 1 | 562 | 6 | 19809 | 1.59E-01 |
| GO:0070257 | positive regulation of mucus se           | BP | 9  | 1 | 562 | 6 | 19809 | 1.59E-01 |
| GO:0097527 | necroptotic signaling pathway             | BP | 5  | 1 | 562 | 6 | 19809 | 1.59E-01 |
| GO:0010694 | positive regulation of alkaline           | BP | 12 | 1 | 562 | 6 | 19809 | 1.59E-01 |
| GO:2000427 | positive regulation of apoptotic          | BP | 9  | 1 | 562 | 6 | 19809 | 1.59E-01 |
| GO:0034447 | very-low-density lipoprotein p            | BP | 5  | 1 | 562 | 6 | 19809 | 1.59E-01 |
| GO:0032914 | positive regulation of transforr          | BP | 9  | 1 | 562 | 6 | 19809 | 1.59E-01 |
| GO:0055009 | atrial cardiac muscle tissue mo           | BP | 8  | 1 | 562 | 6 | 19809 | 1.59E-01 |
| GO:0030368 | interleukin-17 receptor activity          | MF | 7  | 1 | 562 | 6 | 19809 | 1.59E-01 |
| GO:0072559 | NLRP3 inflammasome comple                 | CC | 5  | 1 | 562 | 6 | 19809 | 1.59E-01 |
| GO:0032405 | MutLalpha complex binding                 | MF | 6  | 1 | 562 | 6 | 19809 | 1.59E-01 |
| GO:0002686 | negative regulation of leukocy            | BP | 7  | 1 | 562 | 6 | 19809 | 1.59E-01 |
| GO:0031223 | auditory behavior                         | BP | 5  | 1 | 562 | 6 | 19809 | 1.59E-01 |
| GO:0008238 | exopeptidase activity                     | MF | 7  | 1 | 562 | 6 | 19809 | 1.59E-01 |
| GO:0032782 | bile acid secretion                       | BP | 11 | 1 | 562 | 6 | 19809 | 1.59E-01 |
| GO:0061370 | testosterone biosynthetic proce           | BP | 8  | 1 | 562 | 6 | 19809 | 1.59E-01 |
| GO:0033499 | galactose catabolic process via           | BP | 10 | 1 | 562 | 6 | 19809 | 1.59E-01 |
| GO:0032813 | tumor necrosis factor receptor            | MF | 7  | 1 | 562 | 6 | 19809 | 1.59E-01 |
| GO:0001765 | membrane raft assembly                    | BP | 7  | 1 | 562 | 6 | 19809 | 1.59E-01 |
| GO:0070245 | positive regulation of thymocy            | BP | 13 | 1 | 562 | 6 | 19809 | 1.59E-01 |
| GO:0097119 | postsynaptic density protein 9 $\epsilon$ | BP | 8  | 1 | 562 | 6 | 19809 | 1.59E-01 |
| GO:0089701 | U2AF                                      | CC | 4  | 1 | 562 | 6 | 19809 | 1.59E-01 |
| GO:0043237 | laminin-1 binding                         | MF | 6  | 1 | 562 | 6 | 19809 | 1.59E-01 |
| GO:0048729 | tissue morphogenesis                      | BP | 5  | 1 | 562 | 6 | 19809 | 1.59E-01 |
| GO:0004111 | creatine kinase activity                  | MF | 7  | 1 | 562 | 6 | 19809 | 1.59E-01 |
| GO:2001268 | negative regulation of cysteine           | BP | 11 | 1 | 562 | 6 | 19809 | 1.59E-01 |
| GO:1903978 | regulation of microglial cell ac          | BP | 8  | 1 | 562 | 6 | 19809 | 1.59E-01 |
| GO:0042063 | gliogenesis                               | BP | 7  | 1 | 562 | 6 | 19809 | 1.59E-01 |
| GO:0015866 | ADP transport                             | BP | 9  | 1 | 562 | 6 | 19809 | 1.59E-01 |
| GO:0009812 | flavonoid metabolic process               | BP | 5  | 1 | 562 | 6 | 19809 | 1.59E-01 |
| GO:1900020 | positive regulation of protein k          | BP | 13 | 1 | 562 | 6 | 19809 | 1.59E-01 |
| GO:0097443 | sorting endosome                          | CC | 8  | 1 | 562 | 6 | 19809 | 1.59E-01 |
| GO:0001739 | sex chromatin                             | CC | 9  | 1 | 562 | 6 | 19809 | 1.59E-01 |
| GO:0072384 | organelle transport along micr            | BP | 9  | 1 | 562 | 6 | 19809 | 1.59E-01 |
| GO:2000503 | positive regulation of natural k          | BP | 10 | 1 | 562 | 6 | 19809 | 1.59E-01 |

|            |                                  |    |    |    |     |      |       |          |
|------------|----------------------------------|----|----|----|-----|------|-------|----------|
| GO:0030644 | cellular chloride ion homeosta   | BP | 11 | 1  | 562 | 6    | 19809 | 1.59E-01 |
| GO:0003272 | endocardial cushion formation    | BP | 5  | 1  | 562 | 6    | 19809 | 1.59E-01 |
| GO:0015677 | copper ion import                | BP | 11 | 1  | 562 | 6    | 19809 | 1.59E-01 |
| GO:0035335 | peptidyl-tyrosine dephosphory    | BP | 10 | 5  | 562 | 101  | 19809 | 1.60E-01 |
| GO:0051087 | chaperone binding                | MF | 5  | 5  | 562 | 101  | 19809 | 1.60E-01 |
| GO:0005085 | guanyl-nucleotide exchange fa    | MF | 7  | 8  | 562 | 186  | 19809 | 1.60E-01 |
| GO:0042110 | T cell activation                | BP | 7  | 3  | 562 | 49   | 19809 | 1.62E-01 |
| GO:0051209 | release of sequestered calcium   | BP | 8  | 3  | 562 | 49   | 19809 | 1.62E-01 |
| GO:0001618 | virus receptor activity          | MF | 5  | 4  | 562 | 75   | 19809 | 1.64E-01 |
| GO:0055038 | recycling endosome membran       | CC | 9  | 4  | 562 | 75   | 19809 | 1.64E-01 |
| GO:0005509 | calcium ion binding              | MF | 7  | 25 | 562 | 714  | 19809 | 1.64E-01 |
| GO:0050768 | negative regulation of neuroge   | BP | 9  | 2  | 562 | 26   | 19809 | 1.68E-01 |
| GO:0048741 | skeletal muscle fiber developm   | BP | 9  | 2  | 562 | 26   | 19809 | 1.68E-01 |
| GO:0007026 | negative regulation of microtub  | BP | 10 | 2  | 562 | 26   | 19809 | 1.68E-01 |
| GO:0014003 | oligodendrocyte development      | BP | 7  | 2  | 562 | 26   | 19809 | 1.68E-01 |
| GO:0031032 | actomyosin structure organizat   | BP | 8  | 2  | 562 | 26   | 19809 | 1.68E-01 |
| GO:0031334 | positive regulation of protein c | BP | 7  | 2  | 562 | 26   | 19809 | 1.68E-01 |
| GO:0048675 | axon extension                   | BP | 7  | 2  | 562 | 26   | 19809 | 1.68E-01 |
| GO:0070888 | E-box binding                    | MF | 11 | 3  | 562 | 50   | 19809 | 1.69E-01 |
| GO:0019902 | phosphatase binding              | MF | 6  | 3  | 562 | 50   | 19809 | 1.69E-01 |
| GO:0032720 | negative regulation of tumor n   | BP | 9  | 3  | 562 | 50   | 19809 | 1.69E-01 |
| GO:0031098 | stress-activated protein kinase  | BP | 6  | 3  | 562 | 50   | 19809 | 1.69E-01 |
| GO:0002931 | response to ischemia             | BP | 5  | 3  | 562 | 50   | 19809 | 1.69E-01 |
| GO:0006351 | transcription, DNA-templated     | BP | 8  | 6  | 562 | 131  | 19809 | 1.69E-01 |
| GO:0030512 | negative regulation of transfor  | BP | 10 | 4  | 562 | 76   | 19809 | 1.69E-01 |
| GO:0017148 | negative regulation of translati | BP | 10 | 4  | 562 | 77   | 19809 | 1.75E-01 |
| GO:0009791 | post-embryonic development       | BP | 4  | 4  | 562 | 77   | 19809 | 1.75E-01 |
| GO:0016032 | viral process                    | BP | 6  | 17 | 562 | 466  | 19809 | 1.75E-01 |
| GO:0042802 | identical protein binding        | MF | 5  | 36 | 562 | 1078 | 19809 | 1.76E-01 |
| GO:0042626 | ATPase activity, coupled to tra  | MF | 8  | 3  | 562 | 51   | 19809 | 1.76E-01 |
| GO:0007162 | negative regulation of cell adh  | BP | 6  | 3  | 562 | 51   | 19809 | 1.76E-01 |
| GO:0048167 | regulation of synaptic plasticit | BP | 9  | 3  | 562 | 51   | 19809 | 1.76E-01 |
| GO:0032515 | negative regulation of phospho   | BP | 12 | 3  | 562 | 51   | 19809 | 1.76E-01 |
| GO:0014069 | postsynaptic density             | CC | 5  | 11 | 562 | 281  | 19809 | 1.77E-01 |
| GO:0004540 | ribonuclease activity            | MF | 7  | 2  | 562 | 27   | 19809 | 1.78E-01 |
| GO:0048870 | cell motility                    | BP | 5  | 2  | 562 | 27   | 19809 | 1.78E-01 |
| GO:0005640 | nuclear outer membrane           | CC | 6  | 2  | 562 | 27   | 19809 | 1.78E-01 |
| GO:0060976 | coronary vasculature developm    | BP | 6  | 2  | 562 | 27   | 19809 | 1.78E-01 |
| GO:0042605 | peptide antigen binding          | MF | 5  | 2  | 562 | 27   | 19809 | 1.78E-01 |
| GO:0003746 | translation elongation factor ac | MF | 8  | 2  | 562 | 27   | 19809 | 1.78E-01 |
| GO:0050690 | regulation of defense response   | BP | 7  | 2  | 562 | 27   | 19809 | 1.78E-01 |
| GO:0005184 | neuropeptide hormone activity    | MF | 8  | 2  | 562 | 27   | 19809 | 1.78E-01 |
| GO:0001954 | positive regulation of cell-mati | BP | 8  | 2  | 562 | 27   | 19809 | 1.78E-01 |
| GO:0043687 | post-translational protein modi  | BP | 9  | 13 | 562 | 343  | 19809 | 1.79E-01 |
| GO:0051015 | actin filament binding           | MF | 7  | 8  | 562 | 192  | 19809 | 1.80E-01 |
| GO:0030183 | B cell differentiation           | BP | 8  | 4  | 562 | 78   | 19809 | 1.81E-01 |
| GO:0030628 | pre-mRNA 3'-splice site bindir   | MF | 8  | 1  | 562 | 7    | 19809 | 1.82E-01 |
| GO:0015174 | basic amino acid transmembra     | MF | 8  | 1  | 562 | 7    | 19809 | 1.82E-01 |
| GO:0070585 | protein localization to mitocho  | BP | 8  | 1  | 562 | 7    | 19809 | 1.82E-01 |
| GO:0045835 | negative regulation of meiotic   | BP | 9  | 1  | 562 | 7    | 19809 | 1.82E-01 |

|            |                                    |    |    |   |     |   |       |          |
|------------|------------------------------------|----|----|---|-----|---|-------|----------|
| GO:0042612 | MHC class I protein complex        | CC | 7  | 1 | 562 | 7 | 19809 | 1.82E-01 |
| GO:1903243 | negative regulation of cardiac     | BP | 11 | 1 | 562 | 7 | 19809 | 1.82E-01 |
| GO:0036089 | cleavage furrow formation          | BP | 6  | 1 | 562 | 7 | 19809 | 1.82E-01 |
| GO:1900744 | regulation of p38MAPK casca        | BP | 12 | 1 | 562 | 7 | 19809 | 1.82E-01 |
| GO:0045630 | positive regulation of T-helper    | BP | 9  | 1 | 562 | 7 | 19809 | 1.82E-01 |
| GO:0021902 | commitment of neuronal cell to     | BP | 8  | 1 | 562 | 7 | 19809 | 1.82E-01 |
| GO:0150094 | amyloid-beta clearance by cell     | BP | 6  | 1 | 562 | 7 | 19809 | 1.82E-01 |
| GO:0045428 | regulation of nitric oxide biosy   | BP | 6  | 1 | 562 | 7 | 19809 | 1.82E-01 |
| GO:0097151 | positive regulation of inhibitor   | BP | 9  | 1 | 562 | 7 | 19809 | 1.82E-01 |
| GO:0070973 | protein localization to endopla    | BP | 9  | 1 | 562 | 7 | 19809 | 1.82E-01 |
| GO:0001614 | purinergic nucleotide receptor     | MF | 7  | 1 | 562 | 7 | 19809 | 1.82E-01 |
| GO:0021861 | forebrain radial glial cell differ | BP | 8  | 1 | 562 | 7 | 19809 | 1.82E-01 |
| GO:0051099 | positive regulation of binding     | BP | 6  | 1 | 562 | 7 | 19809 | 1.82E-01 |
| GO:0031730 | CCR5 chemokine receptor bin        | MF | 9  | 1 | 562 | 7 | 19809 | 1.82E-01 |
| GO:0050920 | regulation of chemotaxis           | BP | 7  | 1 | 562 | 7 | 19809 | 1.82E-01 |
| GO:0060536 | cartilage morphogenesis            | BP | 6  | 1 | 562 | 7 | 19809 | 1.82E-01 |
| GO:0071546 | pi-body                            | CC | 9  | 1 | 562 | 7 | 19809 | 1.82E-01 |
| GO:0043496 | regulation of protein homodim      | BP | 7  | 1 | 562 | 7 | 19809 | 1.82E-01 |
| GO:2000318 | positive regulation of T-helper    | BP | 10 | 1 | 562 | 7 | 19809 | 1.82E-01 |
| GO:0048007 | antigen processing and present     | BP | 6  | 1 | 562 | 7 | 19809 | 1.82E-01 |
| GO:0097647 | amylin receptor signaling path     | BP | 7  | 1 | 562 | 7 | 19809 | 1.82E-01 |
| GO:1904798 | positive regulation of core pro    | BP | 9  | 1 | 562 | 7 | 19809 | 1.82E-01 |
| GO:0045348 | positive regulation of MHC cl      | BP | 9  | 1 | 562 | 7 | 19809 | 1.82E-01 |
| GO:0102991 | myristoyl-CoA hydrolase activ      | MF | 7  | 1 | 562 | 7 | 19809 | 1.82E-01 |
| GO:0045919 | positive regulation of cytolysis   | BP | 7  | 1 | 562 | 7 | 19809 | 1.82E-01 |
| GO:0032374 | regulation of cholesterol trans    | BP | 9  | 1 | 562 | 7 | 19809 | 1.82E-01 |
| GO:0006475 | internal protein amino acid ace    | BP | 11 | 1 | 562 | 7 | 19809 | 1.82E-01 |
| GO:0006105 | succinate metabolic process        | BP | 6  | 1 | 562 | 7 | 19809 | 1.82E-01 |
| GO:0071286 | cellular response to magnesium     | BP | 8  | 1 | 562 | 7 | 19809 | 1.82E-01 |
| GO:0004711 | ribosomal protein S6 kinase ac     | MF | 9  | 1 | 562 | 7 | 19809 | 1.82E-01 |
| GO:0006308 | DNA catabolic process              | BP | 8  | 1 | 562 | 7 | 19809 | 1.82E-01 |
| GO:0043270 | positive regulation of ion trans   | BP | 8  | 1 | 562 | 7 | 19809 | 1.82E-01 |
| GO:0017121 | plasma membrane phospholipi        | BP | 7  | 1 | 562 | 7 | 19809 | 1.82E-01 |
| GO:0002674 | negative regulation of acute in    | BP | 10 | 1 | 562 | 7 | 19809 | 1.82E-01 |
| GO:0030497 | fatty acid elongation              | BP | 11 | 1 | 562 | 7 | 19809 | 1.82E-01 |
| GO:0006650 | glycerophospholipid metabolic      | BP | 8  | 1 | 562 | 7 | 19809 | 1.82E-01 |
| GO:2001269 | positive regulation of cysteine-   | BP | 11 | 1 | 562 | 7 | 19809 | 1.82E-01 |
| GO:0015672 | monovalent inorganic cation tr     | BP | 8  | 1 | 562 | 7 | 19809 | 1.82E-01 |
| GO:0032357 | oxidized purine DNA binding        | MF | 9  | 1 | 562 | 7 | 19809 | 1.82E-01 |
| GO:0048842 | positive regulation of axon ext    | BP | 9  | 1 | 562 | 7 | 19809 | 1.82E-01 |
| GO:0030641 | regulation of cellular pH          | BP | 11 | 1 | 562 | 7 | 19809 | 1.82E-01 |
| GO:0060117 | auditory receptor cell developr    | BP | 8  | 1 | 562 | 7 | 19809 | 1.82E-01 |
| GO:0032308 | positive regulation of prostagl    | BP | 10 | 1 | 562 | 7 | 19809 | 1.82E-01 |
| GO:1904684 | negative regulation of metallo     | BP | 12 | 1 | 562 | 7 | 19809 | 1.82E-01 |
| GO:1904781 | positive regulation of protein l   | BP | 7  | 1 | 562 | 7 | 19809 | 1.82E-01 |
| GO:0044351 | macropinocytosis                   | BP | 9  | 1 | 562 | 7 | 19809 | 1.82E-01 |
| GO:0050291 | sphingosine N-acyltransferase      | MF | 8  | 1 | 562 | 7 | 19809 | 1.82E-01 |
| GO:1903288 | positive regulation of potassi     | BP | 12 | 1 | 562 | 7 | 19809 | 1.82E-01 |
| GO:0004536 | deoxyribonuclease activity         | MF | 7  | 1 | 562 | 7 | 19809 | 1.82E-01 |
| GO:0042428 | serotonin metabolic process        | BP | 7  | 1 | 562 | 7 | 19809 | 1.82E-01 |



|            |                                  |    |    |   |     |   |       |          |
|------------|----------------------------------|----|----|---|-----|---|-------|----------|
| GO:0048341 | paraxial mesoderm formation      | BP | 7  | 1 | 562 | 7 | 19809 | 1.82E-01 |
| GO:0072015 | glomerular visceral epithelial c | BP | 8  | 1 | 562 | 7 | 19809 | 1.82E-01 |
| GO:0040036 | regulation of fibroblast growth  | BP | 8  | 1 | 562 | 7 | 19809 | 1.82E-01 |
| GO:0006771 | riboflavin metabolic process     | BP | 7  | 1 | 562 | 7 | 19809 | 1.82E-01 |
| GO:0032808 | lacrimal gland development       | BP | 7  | 1 | 562 | 7 | 19809 | 1.82E-01 |
| GO:0000904 | cell morphogenesis involved in   | BP | 7  | 1 | 562 | 7 | 19809 | 1.82E-01 |
| GO:0009437 | carnitine metabolic process      | BP | 7  | 1 | 562 | 7 | 19809 | 1.82E-01 |
| GO:0086008 | voltage-gated potassium chann    | MF | 10 | 1 | 562 | 7 | 19809 | 1.82E-01 |
| GO:1903997 | positive regulation of non-men   | BP | 13 | 1 | 562 | 7 | 19809 | 1.82E-01 |
| GO:0045654 | positive regulation of megakar   | BP | 9  | 1 | 562 | 7 | 19809 | 1.82E-01 |
| GO:0050996 | positive regulation of lipid cat | BP | 8  | 1 | 562 | 7 | 19809 | 1.82E-01 |
| GO:0048732 | gland development                | BP | 6  | 1 | 562 | 7 | 19809 | 1.82E-01 |
| GO:0016264 | gap junction assembly            | BP | 8  | 1 | 562 | 7 | 19809 | 1.82E-01 |
| GO:0001553 | luteinization                    | BP | 5  | 1 | 562 | 7 | 19809 | 1.82E-01 |
| GO:0010766 | negative regulation of sodium    | BP | 10 | 1 | 562 | 7 | 19809 | 1.82E-01 |
| GO:0048102 | autophagic cell death            | BP | 6  | 1 | 562 | 7 | 19809 | 1.82E-01 |
| GO:1902667 | regulation of axon guidance      | BP | 10 | 1 | 562 | 7 | 19809 | 1.82E-01 |
| GO:0030913 | paranodal junction assembly      | BP | 8  | 1 | 562 | 7 | 19809 | 1.82E-01 |
| GO:0010827 | regulation of glucose transmen   | BP | 8  | 1 | 562 | 7 | 19809 | 1.82E-01 |
| GO:0015939 | pantothenate metabolic proces    | BP | 6  | 1 | 562 | 7 | 19809 | 1.82E-01 |
| GO:0047429 | nucleoside-triphosphate diphos   | MF | 8  | 1 | 562 | 7 | 19809 | 1.82E-01 |
| GO:0045217 | cell-cell junction maintenance   | BP | 7  | 1 | 562 | 7 | 19809 | 1.82E-01 |
| GO:0001505 | regulation of neurotransmitter   | BP | 5  | 1 | 562 | 7 | 19809 | 1.82E-01 |
| GO:0005004 | GPI-linked ephrin receptor act   | MF | 11 | 1 | 562 | 7 | 19809 | 1.82E-01 |
| GO:0001517 | N-acetylglucosamine 6-O-sulfi    | MF | 7  | 1 | 562 | 7 | 19809 | 1.82E-01 |
| GO:0032489 | regulation of Cdc42 protein sig  | BP | 12 | 1 | 562 | 7 | 19809 | 1.82E-01 |
| GO:0060290 | transdifferentiation             | BP | 6  | 1 | 562 | 7 | 19809 | 1.82E-01 |
| GO:0001848 | complement binding               | MF | 5  | 1 | 562 | 7 | 19809 | 1.82E-01 |
| GO:0045545 | syndecan binding                 | MF | 6  | 1 | 562 | 7 | 19809 | 1.82E-01 |
| GO:0043654 | recognition of apoptotic cell    | BP | 6  | 1 | 562 | 7 | 19809 | 1.82E-01 |
| GO:0046514 | ceramide catabolic process       | BP | 10 | 1 | 562 | 7 | 19809 | 1.82E-01 |
| GO:0042167 | heme catabolic process           | BP | 9  | 1 | 562 | 7 | 19809 | 1.82E-01 |
| GO:2000553 | positive regulation of T-helper  | BP | 12 | 1 | 562 | 7 | 19809 | 1.82E-01 |
| GO:0030011 | maintenance of cell polarity     | BP | 5  | 1 | 562 | 7 | 19809 | 1.82E-01 |
| GO:0048179 | activin receptor complex         | CC | 6  | 1 | 562 | 7 | 19809 | 1.82E-01 |
| GO:0002480 | antigen processing and present   | BP | 8  | 1 | 562 | 7 | 19809 | 1.82E-01 |
| GO:0002829 | negative regulation of type 2 in | BP | 8  | 1 | 562 | 7 | 19809 | 1.82E-01 |
| GO:0071014 | post-mRNA release spliceosom     | CC | 7  | 1 | 562 | 7 | 19809 | 1.82E-01 |
| GO:0097084 | vascular smooth muscle cell de   | BP | 7  | 1 | 562 | 7 | 19809 | 1.82E-01 |
| GO:0046578 | regulation of Ras protein signa  | BP | 10 | 1 | 562 | 7 | 19809 | 1.82E-01 |
| GO:0021559 | trigeminal nerve development     | BP | 7  | 1 | 562 | 7 | 19809 | 1.82E-01 |
| GO:0035381 | ATP-gated ion channel activity   | MF | 9  | 1 | 562 | 7 | 19809 | 1.82E-01 |
| GO:0046581 | intercellular canaliculus        | CC | 5  | 1 | 562 | 7 | 19809 | 1.82E-01 |
| GO:0008525 | phosphatidylcholine transporte   | MF | 6  | 1 | 562 | 7 | 19809 | 1.82E-01 |
| GO:0007183 | SMAD protein complex assem       | BP | 8  | 1 | 562 | 7 | 19809 | 1.82E-01 |
| GO:0038085 | vascular endothelial growth fa   | MF | 6  | 1 | 562 | 7 | 19809 | 1.82E-01 |
| GO:0035254 | glutamate receptor binding       | MF | 6  | 1 | 562 | 7 | 19809 | 1.82E-01 |
| GO:0051271 | negative regulation of cellular  | BP | 7  | 1 | 562 | 7 | 19809 | 1.82E-01 |
| GO:2000987 | positive regulation of behavior  | BP | 9  | 1 | 562 | 7 | 19809 | 1.82E-01 |
| GO:0071447 | cellular response to hydropero   | BP | 7  | 1 | 562 | 7 | 19809 | 1.82E-01 |

|            |                                   |    |    |   |     |     |       |          |
|------------|-----------------------------------|----|----|---|-----|-----|-------|----------|
| GO:0120115 | Lsm2-8 complex                    | CC | 5  | 1 | 562 | 7   | 19809 | 1.82E-01 |
| GO:1990247 | N6-methyladenosine-containin      | MF | 7  | 1 | 562 | 7   | 19809 | 1.82E-01 |
| GO:0004931 | extracellularly ATP-gated cati    | MF | 10 | 1 | 562 | 7   | 19809 | 1.82E-01 |
| GO:0050688 | regulation of defense response    | BP | 7  | 1 | 562 | 7   | 19809 | 1.82E-01 |
| GO:0036435 | K48-linked polyubiquitin mod      | MF | 7  | 1 | 562 | 7   | 19809 | 1.82E-01 |
| GO:0045581 | negative regulation of T cell di  | BP | 10 | 1 | 562 | 7   | 19809 | 1.82E-01 |
| GO:0036465 | synaptic vesicle recycling        | BP | 6  | 1 | 562 | 7   | 19809 | 1.82E-01 |
| GO:0032876 | negative regulation of DNA en     | BP | 9  | 1 | 562 | 7   | 19809 | 1.82E-01 |
| GO:0060740 | prostate gland epithelium mor     | BP | 7  | 1 | 562 | 7   | 19809 | 1.82E-01 |
| GO:0045409 | negative regulation of interleu   | BP | 9  | 1 | 562 | 7   | 19809 | 1.82E-01 |
| GO:0019239 | deaminase activity                | MF | 5  | 1 | 562 | 7   | 19809 | 1.82E-01 |
| GO:0035020 | regulation of Rac protein signa   | BP | 11 | 1 | 562 | 7   | 19809 | 1.82E-01 |
| GO:0045111 | intermediate filament cytoskel    | CC | 7  | 3 | 562 | 52  | 19809 | 1.83E-01 |
| GO:0003007 | heart morphogenesis               | BP | 6  | 3 | 562 | 52  | 19809 | 1.83E-01 |
| GO:0051928 | positive regulation of calcium    | BP | 9  | 2 | 562 | 28  | 19809 | 1.88E-01 |
| GO:0051453 | regulation of intracellular pH    | BP | 12 | 2 | 562 | 28  | 19809 | 1.88E-01 |
| GO:0043113 | receptor clustering               | BP | 6  | 2 | 562 | 28  | 19809 | 1.88E-01 |
| GO:0043325 | phosphatidylinositol-3,4-bisph    | MF | 9  | 2 | 562 | 28  | 19809 | 1.88E-01 |
| GO:0014047 | glutamate secretion               | BP | 11 | 2 | 562 | 28  | 19809 | 1.88E-01 |
| GO:0042744 | hydrogen peroxide catabolic p     | BP | 8  | 2 | 562 | 28  | 19809 | 1.88E-01 |
| GO:0007259 | receptor signaling pathway via    | BP | 7  | 2 | 562 | 28  | 19809 | 1.88E-01 |
| GO:0007140 | male meiotic nuclear division     | BP | 5  | 2 | 562 | 28  | 19809 | 1.88E-01 |
| GO:0005539 | glycosaminoglycan binding         | MF | 5  | 2 | 562 | 28  | 19809 | 1.88E-01 |
| GO:0035116 | embryonic hindlimb morphoge       | BP | 8  | 2 | 562 | 28  | 19809 | 1.88E-01 |
| GO:0008083 | growth factor activity            | MF | 7  | 7 | 562 | 165 | 19809 | 1.89E-01 |
| GO:0004252 | serine-type endopeptidase acti    | MF | 8  | 7 | 562 | 165 | 19809 | 1.89E-01 |
| GO:0030659 | cytoplasmic vesicle membrane      | CC | 6  | 7 | 562 | 165 | 19809 | 1.89E-01 |
| GO:0071320 | cellular response to cAMP         | BP | 9  | 3 | 562 | 53  | 19809 | 1.90E-01 |
| GO:0031295 | T cell costimulation              | BP | 5  | 3 | 562 | 53  | 19809 | 1.90E-01 |
| GO:0031252 | cell leading edge                 | CC | 4  | 3 | 562 | 53  | 19809 | 1.90E-01 |
| GO:0004714 | transmembrane receptor protei     | MF | 9  | 3 | 562 | 53  | 19809 | 1.90E-01 |
| GO:0005044 | scavenger receptor activity       | MF | 4  | 3 | 562 | 53  | 19809 | 1.90E-01 |
| GO:0007584 | response to nutrient              | BP | 7  | 4 | 562 | 80  | 19809 | 1.92E-01 |
| GO:1902600 | proton transmembrane transpo      | BP | 9  | 5 | 562 | 108 | 19809 | 1.93E-01 |
| GO:0098793 | presynapse                        | CC | 4  | 6 | 562 | 137 | 19809 | 1.94E-01 |
| GO:0008237 | metallopeptidase activity         | MF | 7  | 7 | 562 | 167 | 19809 | 1.97E-01 |
| GO:0015630 | microtubule cytoskeleton          | CC | 7  | 7 | 562 | 167 | 19809 | 1.97E-01 |
| GO:0005802 | trans-Golgi network               | CC | 7  | 7 | 562 | 167 | 19809 | 1.97E-01 |
| GO:1903078 | positive regulation of protein l  | BP | 10 | 3 | 562 | 54  | 19809 | 1.97E-01 |
| GO:0030838 | positive regulation of actin fila | BP | 9  | 3 | 562 | 54  | 19809 | 1.97E-01 |
| GO:0018149 | peptide cross-linking             | BP | 9  | 3 | 562 | 54  | 19809 | 1.97E-01 |
| GO:0009898 | cytoplasmic side of plasma me     | CC | 5  | 3 | 562 | 54  | 19809 | 1.97E-01 |
| GO:0047485 | protein N-terminus binding        | MF | 5  | 5 | 562 | 109 | 19809 | 1.98E-01 |
| GO:0046875 | ephrin receptor binding           | MF | 6  | 2 | 562 | 29  | 19809 | 1.98E-01 |
| GO:0071889 | 14-3-3 protein binding            | MF | 5  | 2 | 562 | 29  | 19809 | 1.98E-01 |
| GO:0006298 | mismatch repair                   | BP | 9  | 2 | 562 | 29  | 19809 | 1.98E-01 |
| GO:0003785 | actin monomer binding             | MF | 7  | 2 | 562 | 29  | 19809 | 1.98E-01 |
| GO:0046579 | positive regulation of Ras prot   | BP | 11 | 2 | 562 | 29  | 19809 | 1.98E-01 |
| GO:0035035 | histone acetyltransferase bindi   | MF | 6  | 2 | 562 | 29  | 19809 | 1.98E-01 |
| GO:0048589 | developmental growth              | BP | 4  | 2 | 562 | 29  | 19809 | 1.98E-01 |

|            |                                   |    |    |    |     |     |       |          |
|------------|-----------------------------------|----|----|----|-----|-----|-------|----------|
| GO:1904837 | beta-catenin-TCF complex ass      | BP | 7  | 2  | 562 | 29  | 19809 | 1.98E-01 |
| GO:0051281 | positive regulation of release o  | BP | 15 | 2  | 562 | 29  | 19809 | 1.98E-01 |
| GO:0035025 | positive regulation of Rho prot   | BP | 12 | 2  | 562 | 29  | 19809 | 1.98E-01 |
| GO:0020037 | heme binding                      | MF | 6  | 6  | 562 | 138 | 19809 | 1.99E-01 |
| GO:0044877 | protein-containing complex bi     | MF | 4  | 11 | 562 | 289 | 19809 | 2.00E-01 |
| GO:0043066 | negative regulation of apoptoti   | BP | 9  | 19 | 562 | 542 | 19809 | 2.02E-01 |
| GO:0021549 | cerebellum development            | BP | 5  | 3  | 562 | 55  | 19809 | 2.05E-01 |
| GO:0006139 | nucleobase-containing compot      | BP | 6  | 3  | 562 | 55  | 19809 | 2.05E-01 |
| GO:0043434 | response to peptide hormone       | BP | 6  | 3  | 562 | 55  | 19809 | 2.05E-01 |
| GO:1904724 | tertiary granule lumen            | CC | 7  | 3  | 562 | 55  | 19809 | 2.05E-01 |
| GO:0071550 | death-inducing signaling comp     | BP | 7  | 1  | 562 | 8   | 19809 | 2.06E-01 |
| GO:0042599 | lamellar body                     | CC | 9  | 1  | 562 | 8   | 19809 | 2.06E-01 |
| GO:0071141 | SMAD protein complex              | CC | 5  | 1  | 562 | 8   | 19809 | 2.06E-01 |
| GO:0072577 | endothelial cell apoptotic proc   | BP | 8  | 1  | 562 | 8   | 19809 | 2.06E-01 |
| GO:0016229 | steroid dehydrogenase activity    | MF | 5  | 1  | 562 | 8   | 19809 | 2.06E-01 |
| GO:0010518 | positive regulation of phospho    | BP | 9  | 1  | 562 | 8   | 19809 | 2.06E-01 |
| GO:0051920 | peroxiredoxin activity            | MF | 4  | 1  | 562 | 8   | 19809 | 2.06E-01 |
| GO:0060346 | bone trabecula formation          | BP | 6  | 1  | 562 | 8   | 19809 | 2.06E-01 |
| GO:0016049 | cell growth                       | BP | 4  | 1  | 562 | 8   | 19809 | 2.06E-01 |
| GO:0009308 | amine metabolic process           | BP | 6  | 1  | 562 | 8   | 19809 | 2.06E-01 |
| GO:1900244 | positive regulation of synaptic   | BP | 9  | 1  | 562 | 8   | 19809 | 2.06E-01 |
| GO:0003993 | acid phosphatase activity         | MF | 8  | 1  | 562 | 8   | 19809 | 2.06E-01 |
| GO:0006379 | mRNA cleavage                     | BP | 10 | 1  | 562 | 8   | 19809 | 2.06E-01 |
| GO:0004862 | cAMP-dependent protein kinas      | MF | 9  | 1  | 562 | 8   | 19809 | 2.06E-01 |
| GO:0010700 | negative regulation of norepine   | BP | 10 | 1  | 562 | 8   | 19809 | 2.06E-01 |
| GO:0051096 | positive regulation of helicase   | BP | 8  | 1  | 562 | 8   | 19809 | 2.06E-01 |
| GO:0010882 | regulation of cardiac muscle c    | BP | 8  | 1  | 562 | 8   | 19809 | 2.06E-01 |
| GO:0034382 | chylomicron remnant clearanc      | BP | 6  | 1  | 562 | 8   | 19809 | 2.06E-01 |
| GO:0006548 | histidine catabolic process       | BP | 11 | 1  | 562 | 8   | 19809 | 2.06E-01 |
| GO:0017151 | DEAD/H-box RNA helicase b         | MF | 6  | 1  | 562 | 8   | 19809 | 2.06E-01 |
| GO:0035860 | glial cell-derived neurotrophic   | BP | 8  | 1  | 562 | 8   | 19809 | 2.06E-01 |
| GO:0070878 | primary miRNA binding             | MF | 7  | 1  | 562 | 8   | 19809 | 2.06E-01 |
| GO:0061702 | inflammasome complex              | CC | 4  | 1  | 562 | 8   | 19809 | 2.06E-01 |
| GO:0098797 | plasma membrane protein com       | CC | 5  | 1  | 562 | 8   | 19809 | 2.06E-01 |
| GO:0034983 | peptidyl-lysine deacetylation     | BP | 11 | 1  | 562 | 8   | 19809 | 2.06E-01 |
| GO:0046324 | regulation of glucose import      | BP | 9  | 1  | 562 | 8   | 19809 | 2.06E-01 |
| GO:0035767 | endothelial cell chemotaxis       | BP | 10 | 1  | 562 | 8   | 19809 | 2.06E-01 |
| GO:0003254 | regulation of membrane depola     | BP | 6  | 1  | 562 | 8   | 19809 | 2.06E-01 |
| GO:0042609 | CD4 receptor binding              | MF | 6  | 1  | 562 | 8   | 19809 | 2.06E-01 |
| GO:0002115 | store-operated calcium entry      | BP | 11 | 1  | 562 | 8   | 19809 | 2.06E-01 |
| GO:0033292 | T-tubule organization             | BP | 6  | 1  | 562 | 8   | 19809 | 2.06E-01 |
| GO:0090140 | regulation of mitochondrial fis   | BP | 9  | 1  | 562 | 8   | 19809 | 2.06E-01 |
| GO:0018023 | peptidyl-lysine trimethylation    | BP | 12 | 1  | 562 | 8   | 19809 | 2.06E-01 |
| GO:0015889 | cobalamin transport               | BP | 7  | 1  | 562 | 8   | 19809 | 2.06E-01 |
| GO:1902966 | positive regulation of protein l  | BP | 10 | 1  | 562 | 8   | 19809 | 2.06E-01 |
| GO:2000766 | negative regulation of cytoplas   | BP | 11 | 1  | 562 | 8   | 19809 | 2.06E-01 |
| GO:1990712 | HFE-transferrin receptor comp     | CC | 6  | 1  | 562 | 8   | 19809 | 2.06E-01 |
| GO:0060627 | regulation of vesicle-mediated    | BP | 6  | 1  | 562 | 8   | 19809 | 2.06E-01 |
| GO:0004300 | enoyl-CoA hydratase activity      | MF | 7  | 1  | 562 | 8   | 19809 | 2.06E-01 |
| GO:0048312 | intracellular distribution of mit | BP | 8  | 1  | 562 | 8   | 19809 | 2.06E-01 |

|            |                                        |    |    |   |     |   |       |          |
|------------|----------------------------------------|----|----|---|-----|---|-------|----------|
| GO:0034616 | response to laminar fluid shear        | BP | 6  | 1 | 562 | 8 | 19809 | 2.06E-01 |
| GO:0034618 | arginine binding                       | MF | 8  | 1 | 562 | 8 | 19809 | 2.06E-01 |
| GO:0031995 | insulin-like growth factor II bi       | MF | 7  | 1 | 562 | 8 | 19809 | 2.06E-01 |
| GO:0009950 | dorsal/ventral axis specificatio       | BP | 6  | 1 | 562 | 8 | 19809 | 2.06E-01 |
| GO:0031209 | SCAR complex                           | CC | 4  | 1 | 562 | 8 | 19809 | 2.06E-01 |
| GO:0061614 | pri-miRNA transcription by Rl          | BP | 10 | 1 | 562 | 8 | 19809 | 2.06E-01 |
| GO:0008290 | F-actin capping protein comple         | CC | 4  | 1 | 562 | 8 | 19809 | 2.06E-01 |
| GO:1902093 | positive regulation of flagellat       | BP | 8  | 1 | 562 | 8 | 19809 | 2.06E-01 |
| GO:1901522 | positive regulation of transcrip       | BP | 11 | 1 | 562 | 8 | 19809 | 2.06E-01 |
| GO:0005225 | volume-sensitive anion channe          | MF | 8  | 1 | 562 | 8 | 19809 | 2.06E-01 |
| GO:0071499 | cellular response to laminar fl        | BP | 7  | 1 | 562 | 8 | 19809 | 2.06E-01 |
| GO:0031402 | sodium ion binding                     | MF | 8  | 1 | 562 | 8 | 19809 | 2.06E-01 |
| GO:0032736 | positive regulation of interleuk       | BP | 8  | 1 | 562 | 8 | 19809 | 2.06E-01 |
| GO:1903169 | regulation of calcium ion trans        | BP | 10 | 1 | 562 | 8 | 19809 | 2.06E-01 |
| GO:0008526 | phosphatidylinositol transport         | MF | 6  | 1 | 562 | 8 | 19809 | 2.06E-01 |
| GO:0060907 | positive regulation of macroph         | BP | 9  | 1 | 562 | 8 | 19809 | 2.06E-01 |
| GO:0060732 | positive regulation of inositol j      | BP | 10 | 1 | 562 | 8 | 19809 | 2.06E-01 |
| GO:0014732 | skeletal muscle atrophy                | BP | 9  | 1 | 562 | 8 | 19809 | 2.06E-01 |
| GO:0097400 | interleukin-17-mediated signal         | BP | 7  | 1 | 562 | 8 | 19809 | 2.06E-01 |
| GO:0001960 | negative regulation of cytokine        | BP | 9  | 1 | 562 | 8 | 19809 | 2.06E-01 |
| GO:0036396 | RNA N6-methyladenosine met             | CC | 6  | 1 | 562 | 8 | 19809 | 2.06E-01 |
| GO:2000601 | positive regulation of Arp2/3 c        | BP | 11 | 1 | 562 | 8 | 19809 | 2.06E-01 |
| GO:0005688 | U6 snRNP                               | CC | 8  | 1 | 562 | 8 | 19809 | 2.06E-01 |
| GO:0071169 | establishment of protein locali        | BP | 10 | 1 | 562 | 8 | 19809 | 2.06E-01 |
| GO:0006600 | creatine metabolic process             | BP | 6  | 1 | 562 | 8 | 19809 | 2.06E-01 |
| GO:0003857 | 3-hydroxyacyl-CoA dehydroge            | MF | 7  | 1 | 562 | 8 | 19809 | 2.06E-01 |
| GO:0001955 | blood vessel maturation                | BP | 6  | 1 | 562 | 8 | 19809 | 2.06E-01 |
| GO:0071420 | cellular response to histamine         | BP | 8  | 1 | 562 | 8 | 19809 | 2.06E-01 |
| GO:0048608 | reproductive structure develop         | BP | 5  | 1 | 562 | 8 | 19809 | 2.06E-01 |
| GO:0021860 | pyramidal neuron developmen            | BP | 9  | 1 | 562 | 8 | 19809 | 2.06E-01 |
| GO:0035590 | purinergic nucleotide receptor         | BP | 7  | 1 | 562 | 8 | 19809 | 2.06E-01 |
| GO:0098883 | synapse pruning                        | BP | 6  | 1 | 562 | 8 | 19809 | 2.06E-01 |
| GO:0090091 | positive regulation of extracell       | BP | 9  | 1 | 562 | 8 | 19809 | 2.06E-01 |
| GO:0043576 | regulation of respiratory gaseo        | BP | 6  | 1 | 562 | 8 | 19809 | 2.06E-01 |
| GO:0035529 | NADH pyrophosphatase activi            | MF | 9  | 1 | 562 | 8 | 19809 | 2.06E-01 |
| GO:0061384 | heart trabecula morphogenesis          | BP | 6  | 1 | 562 | 8 | 19809 | 2.06E-01 |
| GO:0051683 | establishment of Golgi localiza        | BP | 7  | 1 | 562 | 8 | 19809 | 2.06E-01 |
| GO:0061202 | clathrin-sculpted gamma-amin           | CC | 9  | 1 | 562 | 8 | 19809 | 2.06E-01 |
| GO:0016655 | oxidoreductase activity, acting        | MF | 6  | 1 | 562 | 8 | 19809 | 2.06E-01 |
| GO:2001259 | positive regulation of cation cl       | BP | 8  | 1 | 562 | 8 | 19809 | 2.06E-01 |
| GO:0051646 | mitochondrion localization             | BP | 6  | 1 | 562 | 8 | 19809 | 2.06E-01 |
| GO:0010761 | fibroblast migration                   | BP | 8  | 1 | 562 | 8 | 19809 | 2.06E-01 |
| GO:0003996 | acyl-CoA ligase activity               | MF | 7  | 1 | 562 | 8 | 19809 | 2.06E-01 |
| GO:0071340 | skeletal muscle acetylcholine- $\zeta$ | BP | 7  | 1 | 562 | 8 | 19809 | 2.06E-01 |
| GO:0071493 | cellular response to UV-B              | BP | 9  | 1 | 562 | 8 | 19809 | 2.06E-01 |
| GO:0033010 | paranodal junction                     | CC | 5  | 1 | 562 | 8 | 19809 | 2.06E-01 |
| GO:0016176 | superoxide-generating NADPH            | MF | 6  | 1 | 562 | 8 | 19809 | 2.06E-01 |
| GO:0030119 | AP-type membrane coat adapt            | CC | 6  | 1 | 562 | 8 | 19809 | 2.06E-01 |
| GO:1900246 | positive regulation of RIG-I sig       | BP | 8  | 1 | 562 | 8 | 19809 | 2.06E-01 |
| GO:0032873 | negative regulation of stress-ac       | BP | 12 | 1 | 562 | 8 | 19809 | 2.06E-01 |

|            |                                   |    |    |    |     |     |       |          |
|------------|-----------------------------------|----|----|----|-----|-----|-------|----------|
| GO:0072678 | T cell migration                  | BP | 6  | 1  | 562 | 8   | 19809 | 2.06E-01 |
| GO:0071786 | endoplasmic reticulum tubular     | BP | 7  | 1  | 562 | 8   | 19809 | 2.06E-01 |
| GO:0035912 | dorsal aorta morphogenesis        | BP | 9  | 1  | 562 | 8   | 19809 | 2.06E-01 |
| GO:0070201 | regulation of establishment of    | BP | 7  | 1  | 562 | 8   | 19809 | 2.06E-01 |
| GO:0046930 | pore complex                      | CC | 5  | 1  | 562 | 8   | 19809 | 2.06E-01 |
| GO:0042117 | monocyte activation               | BP | 7  | 1  | 562 | 8   | 19809 | 2.06E-01 |
| GO:0070997 | neuron death                      | BP | 5  | 1  | 562 | 8   | 19809 | 2.06E-01 |
| GO:0006637 | acyl-CoA metabolic process        | BP | 7  | 2  | 562 | 30  | 19809 | 2.09E-01 |
| GO:0007274 | neuromuscular synaptic transn     | BP | 10 | 2  | 562 | 30  | 19809 | 2.09E-01 |
| GO:0001816 | cytokine production               | BP | 4  | 2  | 562 | 30  | 19809 | 2.09E-01 |
| GO:0032715 | negative regulation of interleu   | BP | 8  | 2  | 562 | 30  | 19809 | 2.09E-01 |
| GO:0050769 | positive regulation of neuroger   | BP | 9  | 2  | 562 | 30  | 19809 | 2.09E-01 |
| GO:0001662 | behavioral fear response          | BP | 7  | 2  | 562 | 30  | 19809 | 2.09E-01 |
| GO:2000379 | positive regulation of reactive   | BP | 8  | 2  | 562 | 30  | 19809 | 2.09E-01 |
| GO:0043029 | T cell homeostasis                | BP | 6  | 2  | 562 | 30  | 19809 | 2.09E-01 |
| GO:0034451 | centriolar satellite              | CC | 7  | 2  | 562 | 30  | 19809 | 2.09E-01 |
| GO:0006414 | translational elongation          | BP | 8  | 2  | 562 | 30  | 19809 | 2.09E-01 |
| GO:0046329 | negative regulation of JNK cas    | BP | 13 | 2  | 562 | 30  | 19809 | 2.09E-01 |
| GO:0042327 | positive regulation of phospho    | BP | 10 | 2  | 562 | 30  | 19809 | 2.09E-01 |
| GO:0050852 | T cell receptor signaling pathw   | BP | 8  | 7  | 562 | 170 | 19809 | 2.09E-01 |
| GO:0009055 | electron transfer activity        | MF | 5  | 4  | 562 | 83  | 19809 | 2.10E-01 |
| GO:0034976 | response to endoplasmic reticu    | BP | 6  | 4  | 562 | 83  | 19809 | 2.10E-01 |
| GO:0042542 | response to hydrogen peroxide     | BP | 7  | 3  | 562 | 56  | 19809 | 2.12E-01 |
| GO:0099055 | integral component of postsyn:    | CC | 8  | 3  | 562 | 56  | 19809 | 2.12E-01 |
| GO:0048839 | inner ear development             | BP | 5  | 3  | 562 | 56  | 19809 | 2.12E-01 |
| GO:0043679 | axon terminus                     | CC | 6  | 3  | 562 | 56  | 19809 | 2.12E-01 |
| GO:0046332 | SMAD binding                      | MF | 5  | 3  | 562 | 56  | 19809 | 2.12E-01 |
| GO:0010951 | negative regulation of endopep    | BP | 11 | 6  | 562 | 141 | 19809 | 2.12E-01 |
| GO:0051091 | positive regulation of DNA-bi     | BP | 6  | 5  | 562 | 112 | 19809 | 2.13E-01 |
| GO:0016746 | transferase activity, transferrin | MF | 5  | 7  | 562 | 171 | 19809 | 2.13E-01 |
| GO:0008017 | microtubule binding               | MF | 7  | 9  | 562 | 232 | 19809 | 2.15E-01 |
| GO:0001228 | DNA-binding transcription act     | MF | 6  | 15 | 562 | 420 | 19809 | 2.16E-01 |
| GO:0048662 | negative regulation of smooth     | BP | 8  | 2  | 562 | 31  | 19809 | 2.19E-01 |
| GO:0045880 | positive regulation of smoothe    | BP | 9  | 2  | 562 | 31  | 19809 | 2.19E-01 |
| GO:0016079 | synaptic vesicle exocytosis       | BP | 9  | 2  | 562 | 31  | 19809 | 2.19E-01 |
| GO:0051482 | positive regulation of cytosolic  | BP | 14 | 2  | 562 | 31  | 19809 | 2.19E-01 |
| GO:0050807 | regulation of synapse organiza    | BP | 7  | 2  | 562 | 31  | 19809 | 2.19E-01 |
| GO:0048856 | anatomical structure developm     | BP | 4  | 2  | 562 | 31  | 19809 | 2.19E-01 |
| GO:1990837 | sequence-specific double-stran    | MF | 8  | 2  | 562 | 31  | 19809 | 2.19E-01 |
| GO:0001819 | positive regulation of cytokine   | BP | 7  | 2  | 562 | 31  | 19809 | 2.19E-01 |
| GO:0050699 | WW domain binding                 | MF | 6  | 2  | 562 | 31  | 19809 | 2.19E-01 |
| GO:0043542 | endothelial cell migration        | BP | 9  | 2  | 562 | 31  | 19809 | 2.19E-01 |
| GO:0001786 | phosphatidylserine binding        | MF | 6  | 3  | 562 | 57  | 19809 | 2.19E-01 |
| GO:0019730 | antimicrobial humoral respons     | BP | 6  | 3  | 562 | 57  | 19809 | 2.19E-01 |
| GO:0035577 | azurophil granule membrane        | CC | 10 | 3  | 562 | 57  | 19809 | 2.19E-01 |
| GO:0007188 | adenylate cyclase-modulating      | BP | 7  | 3  | 562 | 57  | 19809 | 2.19E-01 |
| GO:0031901 | early endosome membrane           | CC | 9  | 6  | 562 | 143 | 19809 | 2.21E-01 |
| GO:0042742 | defense response to bacterium     | BP | 8  | 9  | 562 | 235 | 19809 | 2.25E-01 |
| GO:0006959 | humoral immune response           | BP | 5  | 3  | 562 | 58  | 19809 | 2.27E-01 |
| GO:0001889 | liver development                 | BP | 7  | 4  | 562 | 86  | 19809 | 2.28E-01 |

|            |                                  |    |    |   |     |    |       |          |
|------------|----------------------------------|----|----|---|-----|----|-------|----------|
| GO:0033138 | positive regulation of peptidyl- | BP | 11 | 4 | 562 | 86 | 19809 | 2.28E-01 |
| GO:0010873 | positive regulation of choleste  | BP | 10 | 1 | 562 | 9  | 19809 | 2.28E-01 |
| GO:0090650 | cellular response to oxygen-gl   | BP | 8  | 1 | 562 | 9  | 19809 | 2.28E-01 |
| GO:0005861 | troponin complex                 | CC | 4  | 1 | 562 | 9  | 19809 | 2.28E-01 |
| GO:1900004 | negative regulation of serine-ty | BP | 12 | 1 | 562 | 9  | 19809 | 2.28E-01 |
| GO:0086011 | membrane repolarization durin    | BP | 9  | 1 | 562 | 9  | 19809 | 2.28E-01 |
| GO:0097091 | synaptic vesicle clustering      | BP | 8  | 1 | 562 | 9  | 19809 | 2.28E-01 |
| GO:0048387 | negative regulation of retinoic  | BP | 9  | 1 | 562 | 9  | 19809 | 2.28E-01 |
| GO:0032395 | MHC class II receptor activity   | MF | 6  | 1 | 562 | 9  | 19809 | 2.28E-01 |
| GO:0051292 | nuclear pore complex assembl     | BP | 8  | 1 | 562 | 9  | 19809 | 2.28E-01 |
| GO:2000177 | regulation of neural precursor   | BP | 7  | 1 | 562 | 9  | 19809 | 2.28E-01 |
| GO:0004022 | alcohol dehydrogenase (NAD)      | MF | 7  | 1 | 562 | 9  | 19809 | 2.28E-01 |
| GO:0048806 | genitalia development            | BP | 6  | 1 | 562 | 9  | 19809 | 2.28E-01 |
| GO:0016868 | intramolecular transferase acti  | MF | 6  | 1 | 562 | 9  | 19809 | 2.28E-01 |
| GO:0097011 | cellular response to granulocyt  | BP | 8  | 1 | 562 | 9  | 19809 | 2.28E-01 |
| GO:0005501 | retinoid binding                 | MF | 6  | 1 | 562 | 9  | 19809 | 2.28E-01 |
| GO:0033622 | integrin activation              | BP | 7  | 1 | 562 | 9  | 19809 | 2.28E-01 |
| GO:0032592 | integral component of mitoch     | CC | 7  | 1 | 562 | 9  | 19809 | 2.28E-01 |
| GO:0038113 | interleukin-9-mediated signalin  | BP | 7  | 1 | 562 | 9  | 19809 | 2.28E-01 |
| GO:0003416 | endochondral bone growth         | BP | 6  | 1 | 562 | 9  | 19809 | 2.28E-01 |
| GO:0022417 | protein maturation by protein f  | BP | 5  | 1 | 562 | 9  | 19809 | 2.28E-01 |
| GO:0070493 | thrombin-activated receptor sig  | BP | 6  | 1 | 562 | 9  | 19809 | 2.28E-01 |
| GO:0001574 | ganglioside biosynthetic proce   | BP | 11 | 1 | 562 | 9  | 19809 | 2.28E-01 |
| GO:0048048 | embryonic eye morphogenesis      | BP | 7  | 1 | 562 | 9  | 19809 | 2.28E-01 |
| GO:0071374 | cellular response to parathyroi  | BP | 7  | 1 | 562 | 9  | 19809 | 2.28E-01 |
| GO:0006621 | protein retention in ER lumen    | BP | 9  | 1 | 562 | 9  | 19809 | 2.28E-01 |
| GO:0048712 | negative regulation of astrocyt  | BP | 12 | 1 | 562 | 9  | 19809 | 2.28E-01 |
| GO:0034405 | response to fluid shear stress   | BP | 5  | 1 | 562 | 9  | 19809 | 2.28E-01 |
| GO:0032300 | mismatch repair complex          | CC | 5  | 1 | 562 | 9  | 19809 | 2.28E-01 |
| GO:0010226 | response to lithium ion          | BP | 7  | 1 | 562 | 9  | 19809 | 2.28E-01 |
| GO:0032059 | bleb                             | CC | 6  | 1 | 562 | 9  | 19809 | 2.28E-01 |
| GO:0038092 | nodal signaling pathway          | BP | 9  | 1 | 562 | 9  | 19809 | 2.28E-01 |
| GO:0010888 | negative regulation of lipid sto | BP | 6  | 1 | 562 | 9  | 19809 | 2.28E-01 |
| GO:0001973 | adenosine receptor signaling p   | BP | 7  | 1 | 562 | 9  | 19809 | 2.28E-01 |
| GO:2000304 | positive regulation of ceramide  | BP | 9  | 1 | 562 | 9  | 19809 | 2.28E-01 |
| GO:1900027 | regulation of ruffle assembly    | BP | 10 | 1 | 562 | 9  | 19809 | 2.28E-01 |
| GO:0045656 | negative regulation of monocy    | BP | 10 | 1 | 562 | 9  | 19809 | 2.28E-01 |
| GO:2000650 | negative regulation of sodium    | BP | 8  | 1 | 562 | 9  | 19809 | 2.28E-01 |
| GO:0023052 | signaling                        | BP | 3  | 1 | 562 | 9  | 19809 | 2.28E-01 |
| GO:0099527 | postsynapse to nucleus signalin  | BP | 6  | 1 | 562 | 9  | 19809 | 2.28E-01 |
| GO:0008354 | germ cell migration              | BP | 7  | 1 | 562 | 9  | 19809 | 2.28E-01 |
| GO:1903202 | negative regulation of oxidativ  | BP | 8  | 1 | 562 | 9  | 19809 | 2.28E-01 |
| GO:0010594 | regulation of endothelial cell n | BP | 9  | 1 | 562 | 9  | 19809 | 2.28E-01 |
| GO:0070613 | regulation of protein processin  | BP | 9  | 1 | 562 | 9  | 19809 | 2.28E-01 |
| GO:0071636 | positive regulation of transforr | BP | 8  | 1 | 562 | 9  | 19809 | 2.28E-01 |
| GO:0051880 | G-quadruplex DNA binding         | MF | 7  | 1 | 562 | 9  | 19809 | 2.28E-01 |
| GO:0016045 | detection of bacterium           | BP | 8  | 1 | 562 | 9  | 19809 | 2.28E-01 |
| GO:0072089 | stem cell proliferation          | BP | 4  | 1 | 562 | 9  | 19809 | 2.28E-01 |
| GO:0040012 | regulation of locomotion         | BP | 5  | 1 | 562 | 9  | 19809 | 2.28E-01 |
| GO:0018026 | peptidyl-lysine monomethylati    | BP | 12 | 1 | 562 | 9  | 19809 | 2.28E-01 |

|            |                                   |    |    |   |     |     |       |          |
|------------|-----------------------------------|----|----|---|-----|-----|-------|----------|
| GO:0034702 | ion channel complex               | CC | 6  | 1 | 562 | 9   | 19809 | 2.28E-01 |
| GO:0014009 | glial cell proliferation          | BP | 4  | 1 | 562 | 9   | 19809 | 2.28E-01 |
| GO:0060429 | epithelium development            | BP | 6  | 1 | 562 | 9   | 19809 | 2.28E-01 |
| GO:0035456 | response to interferon-beta       | BP | 7  | 1 | 562 | 9   | 19809 | 2.28E-01 |
| GO:0042491 | inner ear auditory receptor cell  | BP | 9  | 1 | 562 | 9   | 19809 | 2.28E-01 |
| GO:0000774 | adenyl-nucleotide exchange fa     | MF | 8  | 1 | 562 | 9   | 19809 | 2.28E-01 |
| GO:0021984 | adenohypophysis development       | BP | 5  | 1 | 562 | 9   | 19809 | 2.28E-01 |
| GO:0006782 | protoporphyrinogen IX biosyn      | BP | 9  | 1 | 562 | 9   | 19809 | 2.28E-01 |
| GO:0060539 | diaphragm development             | BP | 8  | 1 | 562 | 9   | 19809 | 2.28E-01 |
| GO:0044754 | autolysosome                      | CC | 10 | 1 | 562 | 9   | 19809 | 2.28E-01 |
| GO:0051782 | negative regulation of cell divi  | BP | 7  | 1 | 562 | 9   | 19809 | 2.28E-01 |
| GO:0060087 | relaxation of vascular smooth m   | BP | 8  | 1 | 562 | 9   | 19809 | 2.28E-01 |
| GO:0004000 | adenosine deaminase activity      | MF | 7  | 1 | 562 | 9   | 19809 | 2.28E-01 |
| GO:0032330 | regulation of chondrocyte diff    | BP | 7  | 1 | 562 | 9   | 19809 | 2.28E-01 |
| GO:0015810 | aspartate transmembrane transp    | BP | 12 | 1 | 562 | 9   | 19809 | 2.28E-01 |
| GO:0043567 | regulation of insulin-like grow   | BP | 8  | 1 | 562 | 9   | 19809 | 2.28E-01 |
| GO:0045124 | regulation of bone resorption     | BP | 8  | 1 | 562 | 9   | 19809 | 2.28E-01 |
| GO:0046620 | regulation of organ growth        | BP | 7  | 1 | 562 | 9   | 19809 | 2.28E-01 |
| GO:0050810 | regulation of steroid biosynthe   | BP | 9  | 1 | 562 | 9   | 19809 | 2.28E-01 |
| GO:0031985 | Golgi cisterna                    | CC | 7  | 1 | 562 | 9   | 19809 | 2.28E-01 |
| GO:0035065 | regulation of histone acetylatic  | BP | 10 | 1 | 562 | 9   | 19809 | 2.28E-01 |
| GO:0014037 | Schwann cell differentiation      | BP | 7  | 1 | 562 | 9   | 19809 | 2.28E-01 |
| GO:0060039 | pericardium development           | BP | 7  | 1 | 562 | 9   | 19809 | 2.28E-01 |
| GO:0010544 | negative regulation of platelet   | BP | 9  | 1 | 562 | 9   | 19809 | 2.28E-01 |
| GO:0071312 | cellular response to alkaloid     | BP | 8  | 1 | 562 | 9   | 19809 | 2.28E-01 |
| GO:0043306 | positive regulation of mast cell  | BP | 10 | 1 | 562 | 9   | 19809 | 2.28E-01 |
| GO:0061371 | determination of heart left/right | BP | 8  | 1 | 562 | 9   | 19809 | 2.28E-01 |
| GO:0048667 | cell morphogenesis involved in    | BP | 8  | 1 | 562 | 9   | 19809 | 2.28E-01 |
| GO:0016043 | cellular component organization   | BP | 4  | 1 | 562 | 9   | 19809 | 2.28E-01 |
| GO:0017162 | aryl hydrocarbon receptor bindi   | MF | 6  | 1 | 562 | 9   | 19809 | 2.28E-01 |
| GO:0036353 | histone H2A-K119 monoubiquit      | BP | 15 | 1 | 562 | 9   | 19809 | 2.28E-01 |
| GO:0043304 | regulation of mast cell degranu   | BP | 9  | 1 | 562 | 9   | 19809 | 2.28E-01 |
| GO:0031095 | platelet dense tubular network    | CC | 5  | 1 | 562 | 9   | 19809 | 2.28E-01 |
| GO:0003417 | growth plate cartilage developm   | BP | 8  | 1 | 562 | 9   | 19809 | 2.28E-01 |
| GO:0097094 | craniofacial suture morphogen     | BP | 5  | 1 | 562 | 9   | 19809 | 2.28E-01 |
| GO:0009266 | response to temperature stimul    | BP | 5  | 1 | 562 | 9   | 19809 | 2.28E-01 |
| GO:0034774 | secretory granule lumen           | CC | 7  | 5 | 562 | 115 | 19809 | 2.28E-01 |
| GO:0046777 | protein autophosphorylation       | BP | 10 | 7 | 562 | 175 | 19809 | 2.30E-01 |
| GO:0030041 | actin filament polymerization     | BP | 8  | 2 | 562 | 32  | 19809 | 2.30E-01 |
| GO:0048147 | negative regulation of fibrobla   | BP | 8  | 2 | 562 | 32  | 19809 | 2.30E-01 |
| GO:0043392 | negative regulation of DNA bi     | BP | 7  | 2 | 562 | 32  | 19809 | 2.30E-01 |
| GO:0005921 | gap junction                      | CC | 5  | 2 | 562 | 32  | 19809 | 2.30E-01 |
| GO:1901223 | negative regulation of NIK/NF     | BP | 10 | 2 | 562 | 32  | 19809 | 2.30E-01 |
| GO:0048018 | receptor ligand activity          | MF | 6  | 2 | 562 | 32  | 19809 | 2.30E-01 |
| GO:0043278 | response to morphine              | BP | 6  | 2 | 562 | 32  | 19809 | 2.30E-01 |
| GO:0038083 | peptidyl-tyrosine autophospho     | BP | 11 | 2 | 562 | 32  | 19809 | 2.30E-01 |
| GO:0007528 | neuromuscular junction develc     | BP | 6  | 2 | 562 | 32  | 19809 | 2.30E-01 |
| GO:0030336 | negative regulation of cell mig   | BP | 8  | 6 | 562 | 145 | 19809 | 2.30E-01 |
| GO:0007507 | heart development                 | BP | 6  | 9 | 562 | 237 | 19809 | 2.32E-01 |
| GO:0044297 | cell body                         | CC | 4  | 4 | 562 | 87  | 19809 | 2.34E-01 |

|            |                                    |    |    |    |     |     |       |          |
|------------|------------------------------------|----|----|----|-----|-----|-------|----------|
| GO:0046718 | viral entry into host cell         | BP | 9  | 4  | 562 | 87  | 19809 | 2.34E-01 |
| GO:0060395 | SMAD protein signal transduc       | BP | 5  | 3  | 562 | 59  | 19809 | 2.34E-01 |
| GO:0015631 | tubulin binding                    | MF | 6  | 3  | 562 | 59  | 19809 | 2.34E-01 |
| GO:0006879 | cellular iron ion homeostasis      | BP | 12 | 3  | 562 | 59  | 19809 | 2.34E-01 |
| GO:0032755 | positive regulation of interleuk   | BP | 8  | 3  | 562 | 59  | 19809 | 2.34E-01 |
| GO:0006816 | calcium ion transport              | BP | 10 | 6  | 562 | 146 | 19809 | 2.35E-01 |
| GO:0018105 | peptidyl-serine phosphorylatio     | BP | 10 | 6  | 562 | 146 | 19809 | 2.35E-01 |
| GO:0043085 | positive regulation of catalytic   | BP | 6  | 4  | 562 | 88  | 19809 | 2.40E-01 |
| GO:0017157 | regulation of exocytosis           | BP | 7  | 2  | 562 | 33  | 19809 | 2.40E-01 |
| GO:0035115 | embryonic forelimb morphoge        | BP | 8  | 2  | 562 | 33  | 19809 | 2.40E-01 |
| GO:0030534 | adult behavior                     | BP | 4  | 2  | 562 | 33  | 19809 | 2.40E-01 |
| GO:0004553 | hydrolase activity, hydrolyzing    | MF | 6  | 2  | 562 | 33  | 19809 | 2.40E-01 |
| GO:0022008 | neurogenesis                       | BP | 6  | 3  | 562 | 60  | 19809 | 2.42E-01 |
| GO:0031234 | extrinsic component of cytoplæ     | CC | 6  | 3  | 562 | 60  | 19809 | 2.42E-01 |
| GO:0005801 | cis-Golgi network                  | CC | 6  | 3  | 562 | 60  | 19809 | 2.42E-01 |
| GO:0007611 | learning or memory                 | BP | 4  | 3  | 562 | 60  | 19809 | 2.42E-01 |
| GO:0005096 | GTPase activator activity          | MF | 6  | 10 | 562 | 271 | 19809 | 2.42E-01 |
| GO:0030027 | lamellipodium                      | CC | 6  | 7  | 562 | 178 | 19809 | 2.42E-01 |
| GO:0005911 | cell-cell junction                 | CC | 4  | 7  | 562 | 178 | 19809 | 2.42E-01 |
| GO:0031902 | late endosome membrane             | CC | 9  | 5  | 562 | 119 | 19809 | 2.49E-01 |
| GO:0016525 | negative regulation of angioge     | BP | 8  | 5  | 562 | 119 | 19809 | 2.49E-01 |
| GO:1901215 | negative regulation of neuron c    | BP | 8  | 3  | 562 | 61  | 19809 | 2.50E-01 |
| GO:0005903 | brush border                       | CC | 5  | 3  | 562 | 61  | 19809 | 2.50E-01 |
| GO:0016529 | sarcoplasmic reticulum             | CC | 7  | 3  | 562 | 61  | 19809 | 2.50E-01 |
| GO:0090084 | negative regulation of inclusio    | BP | 8  | 1  | 562 | 10  | 19809 | 2.50E-01 |
| GO:0032041 | NAD-dependent histone deace        | MF | 9  | 1  | 562 | 10  | 19809 | 2.50E-01 |
| GO:2001056 | positive regulation of cysteine-   | BP | 12 | 1  | 562 | 10  | 19809 | 2.50E-01 |
| GO:0032940 | secretion by cell                  | BP | 4  | 1  | 562 | 10  | 19809 | 2.50E-01 |
| GO:0071437 | invadopodium                       | CC | 6  | 1  | 562 | 10  | 19809 | 2.50E-01 |
| GO:0008347 | glial cell migration               | BP | 7  | 1  | 562 | 10  | 19809 | 2.50E-01 |
| GO:0060287 | epithelial cilium movement in      | BP | 8  | 1  | 562 | 10  | 19809 | 2.50E-01 |
| GO:0051901 | positive regulation of mitochoi    | BP | 8  | 1  | 562 | 10  | 19809 | 2.50E-01 |
| GO:0046621 | negative regulation of organ gr    | BP | 8  | 1  | 562 | 10  | 19809 | 2.50E-01 |
| GO:0006569 | tryptophan catabolic process       | BP | 11 | 1  | 562 | 10  | 19809 | 2.50E-01 |
| GO:0045793 | positive regulation of cell size   | BP | 7  | 1  | 562 | 10  | 19809 | 2.50E-01 |
| GO:0051272 | positive regulation of cellular c  | BP | 7  | 1  | 562 | 10  | 19809 | 2.50E-01 |
| GO:0003149 | membranous septum morphoge         | BP | 5  | 1  | 562 | 10  | 19809 | 2.50E-01 |
| GO:0031419 | cobalamin binding                  | MF | 5  | 1  | 562 | 10  | 19809 | 2.50E-01 |
| GO:0042271 | susceptibility to natural killer c | BP | 9  | 1  | 562 | 10  | 19809 | 2.50E-01 |
| GO:0007494 | midgut development                 | BP | 7  | 1  | 562 | 10  | 19809 | 2.50E-01 |
| GO:0035721 | intraciliary retrograde transpor   | BP | 8  | 1  | 562 | 10  | 19809 | 2.50E-01 |
| GO:1990907 | beta-catenin-TCF complex           | CC | 7  | 1  | 562 | 10  | 19809 | 2.50E-01 |
| GO:0003810 | protein-glutamine gamma-glut       | MF | 7  | 1  | 562 | 10  | 19809 | 2.50E-01 |
| GO:0071723 | lipopeptide binding                | MF | 5  | 1  | 562 | 10  | 19809 | 2.50E-01 |
| GO:0021879 | forebrain neuron differentiatio    | BP | 8  | 1  | 562 | 10  | 19809 | 2.50E-01 |
| GO:0033539 | fatty acid beta-oxidation using    | BP | 12 | 1  | 562 | 10  | 19809 | 2.50E-01 |
| GO:0051918 | negative regulation of fibrinoly   | BP | 9  | 1  | 562 | 10  | 19809 | 2.50E-01 |
| GO:0009651 | response to salt stress            | BP | 6  | 1  | 562 | 10  | 19809 | 2.50E-01 |
| GO:0033179 | proton-transporting V-type AT      | CC | 6  | 1  | 562 | 10  | 19809 | 2.50E-01 |
| GO:0038063 | collagen-activated tyrosine kin    | BP | 8  | 1  | 562 | 10  | 19809 | 2.50E-01 |



|            |                                                               |    |    |   |     |    |       |          |
|------------|---------------------------------------------------------------|----|----|---|-----|----|-------|----------|
| GO:0019911 | structural constituent of myelin                              | MF | 4  | 1 | 562 | 10 | 19809 | 2.50E-01 |
| GO:0097197 | tetraspanin-enriched microdomain                              | CC | 5  | 1 | 562 | 10 | 19809 | 2.50E-01 |
| GO:0034138 | toll-like receptor 3 signaling pathway                        | BP | 9  | 1 | 562 | 10 | 19809 | 2.50E-01 |
| GO:0042053 | regulation of dopamine metabolism                             | BP | 9  | 1 | 562 | 10 | 19809 | 2.50E-01 |
| GO:0016504 | peptidase activator activity                                  | MF | 6  | 1 | 562 | 10 | 19809 | 2.50E-01 |
| GO:0002456 | T cell mediated immunity                                      | BP | 7  | 1 | 562 | 10 | 19809 | 2.50E-01 |
| GO:0038007 | netrin-activated signaling pathway                            | BP | 6  | 1 | 562 | 10 | 19809 | 2.50E-01 |
| GO:0006171 | cAMP biosynthetic process                                     | BP | 12 | 1 | 562 | 10 | 19809 | 2.50E-01 |
| GO:0006012 | galactose metabolic process                                   | BP | 8  | 1 | 562 | 10 | 19809 | 2.50E-01 |
| GO:0005832 | chaperonin-containing T-complex                               | CC | 7  | 1 | 562 | 10 | 19809 | 2.50E-01 |
| GO:0001706 | endoderm formation                                            | BP | 6  | 1 | 562 | 10 | 19809 | 2.50E-01 |
| GO:2000480 | negative regulation of cAMP-dependent protein kinase activity | BP | 13 | 1 | 562 | 10 | 19809 | 2.50E-01 |
| GO:0010907 | positive regulation of glucose transport                      | BP | 10 | 1 | 562 | 10 | 19809 | 2.50E-01 |
| GO:0006972 | hyperosmotic response                                         | BP | 6  | 1 | 562 | 10 | 19809 | 2.50E-01 |
| GO:0090394 | negative regulation of excitatory synaptic transmission       | BP | 9  | 1 | 562 | 10 | 19809 | 2.50E-01 |
| GO:0051428 | peptide hormone receptor binding                              | MF | 7  | 1 | 562 | 10 | 19809 | 2.50E-01 |
| GO:0046887 | positive regulation of hormone secretion                      | BP | 8  | 1 | 562 | 10 | 19809 | 2.50E-01 |
| GO:0004859 | phospholipase inhibitor activity                              | MF | 7  | 1 | 562 | 10 | 19809 | 2.50E-01 |
| GO:0071313 | cellular response to caffeine                                 | BP | 7  | 1 | 562 | 10 | 19809 | 2.50E-01 |
| GO:0001162 | RNA polymerase II intronic transcription                      | MF | 10 | 1 | 562 | 10 | 19809 | 2.50E-01 |
| GO:0045741 | positive regulation of epidermal cell proliferation           | BP | 10 | 1 | 562 | 10 | 19809 | 2.50E-01 |
| GO:1990416 | cellular response to brain-derived neurotrophic factor        | BP | 9  | 1 | 562 | 10 | 19809 | 2.50E-01 |
| GO:0008190 | eukaryotic initiation factor 4E binding                       | MF | 6  | 1 | 562 | 10 | 19809 | 2.50E-01 |
| GO:0033619 | membrane protein proteolysis                                  | BP | 8  | 1 | 562 | 10 | 19809 | 2.50E-01 |
| GO:0050663 | cytokine secretion                                            | BP | 11 | 1 | 562 | 10 | 19809 | 2.50E-01 |
| GO:0030510 | regulation of BMP signaling pathway                           | BP | 10 | 1 | 562 | 10 | 19809 | 2.50E-01 |
| GO:0031053 | primary miRNA processing                                      | BP | 11 | 1 | 562 | 10 | 19809 | 2.50E-01 |
| GO:0030432 | peristalsis                                                   | BP | 9  | 1 | 562 | 10 | 19809 | 2.50E-01 |
| GO:0050795 | regulation of behavior                                        | BP | 5  | 1 | 562 | 10 | 19809 | 2.50E-01 |
| GO:0150077 | regulation of neuroinflammation                               | BP | 9  | 1 | 562 | 10 | 19809 | 2.50E-01 |
| GO:0097062 | dendritic spine maintenance                                   | BP | 6  | 1 | 562 | 10 | 19809 | 2.50E-01 |
| GO:0097484 | dendrite extension                                            | BP | 7  | 1 | 562 | 10 | 19809 | 2.50E-01 |
| GO:0032525 | somite rostral/caudal axis specification                      | BP | 7  | 1 | 562 | 10 | 19809 | 2.50E-01 |
| GO:0033690 | positive regulation of osteoblast proliferation               | BP | 8  | 1 | 562 | 10 | 19809 | 2.50E-01 |
| GO:0009101 | glycoprotein biosynthetic process                             | BP | 8  | 1 | 562 | 10 | 19809 | 2.50E-01 |
| GO:0045416 | positive regulation of interleukin-6 production               | BP | 9  | 1 | 562 | 10 | 19809 | 2.50E-01 |
| GO:1990124 | messenger ribonucleoprotein complex                           | CC | 5  | 1 | 562 | 10 | 19809 | 2.50E-01 |
| GO:0071470 | cellular response to osmotic stress                           | BP | 6  | 1 | 562 | 10 | 19809 | 2.50E-01 |
| GO:0002827 | positive regulation of T-helper cell differentiation          | BP | 10 | 1 | 562 | 10 | 19809 | 2.50E-01 |
| GO:0016188 | synaptic vesicle maturation                                   | BP | 7  | 1 | 562 | 10 | 19809 | 2.50E-01 |
| GO:0046425 | regulation of receptor signaling pathway                      | BP | 9  | 1 | 562 | 10 | 19809 | 2.50E-01 |
| GO:0046888 | negative regulation of hormone secretion                      | BP | 8  | 1 | 562 | 10 | 19809 | 2.50E-01 |
| GO:0097066 | response to thyroid hormone                                   | BP | 6  | 1 | 562 | 10 | 19809 | 2.50E-01 |
| GO:0046641 | positive regulation of alpha-beta T cell differentiation      | BP | 12 | 1 | 562 | 10 | 19809 | 2.50E-01 |
| GO:0070723 | response to cholesterol                                       | BP | 8  | 1 | 562 | 10 | 19809 | 2.50E-01 |
| GO:0042118 | endothelial cell activation                                   | BP | 5  | 1 | 562 | 10 | 19809 | 2.50E-01 |
| GO:0016175 | superoxide-generating NADPH oxidase activity                  | MF | 7  | 1 | 562 | 10 | 19809 | 2.50E-01 |
| GO:0004966 | galanin receptor activity                                     | MF | 8  | 1 | 562 | 10 | 19809 | 2.50E-01 |
| GO:0005883 | neurofilament                                                 | CC | 8  | 1 | 562 | 10 | 19809 | 2.50E-01 |
| GO:0002082 | regulation of oxidative phosphorylation                       | BP | 10 | 1 | 562 | 10 | 19809 | 2.50E-01 |

|            |                                  |    |    |    |     |     |       |          |
|------------|----------------------------------|----|----|----|-----|-----|-------|----------|
| GO:0097449 | astrocyte projection             | CC | 7  | 1  | 562 | 10  | 19809 | 2.50E-01 |
| GO:0060272 | embryonic skeletal joint morpl   | BP | 8  | 1  | 562 | 10  | 19809 | 2.50E-01 |
| GO:0003091 | renal water homeostasis          | BP | 6  | 2  | 562 | 34  | 19809 | 2.51E-01 |
| GO:0014065 | phosphatidylinositol 3-kinase s  | BP | 8  | 2  | 562 | 34  | 19809 | 2.51E-01 |
| GO:0051973 | positive regulation of telomera  | BP | 8  | 2  | 562 | 34  | 19809 | 2.51E-01 |
| GO:0001530 | lipopolysaccharide binding       | MF | 5  | 2  | 562 | 34  | 19809 | 2.51E-01 |
| GO:0051930 | regulation of sensory perceptic  | BP | 9  | 2  | 562 | 34  | 19809 | 2.51E-01 |
| GO:0010975 | regulation of neuron projectior  | BP | 10 | 2  | 562 | 34  | 19809 | 2.51E-01 |
| GO:0007029 | endoplasmic reticulum organiz    | BP | 6  | 2  | 562 | 34  | 19809 | 2.51E-01 |
| GO:0048536 | spleen development               | BP | 7  | 2  | 562 | 34  | 19809 | 2.51E-01 |
| GO:0021510 | spinal cord development          | BP | 6  | 2  | 562 | 34  | 19809 | 2.51E-01 |
| GO:0048701 | embryonic cranial skeleton mo    | BP | 8  | 2  | 562 | 34  | 19809 | 2.51E-01 |
| GO:0035579 | specific granule membrane        | CC | 8  | 4  | 562 | 90  | 19809 | 2.52E-01 |
| GO:0046982 | protein heterodimerization acti  | MF | 6  | 18 | 562 | 532 | 19809 | 2.54E-01 |
| GO:0001822 | kidney development               | BP | 6  | 5  | 562 | 120 | 19809 | 2.55E-01 |
| GO:0001523 | retinoid metabolic process       | BP | 10 | 3  | 562 | 62  | 19809 | 2.57E-01 |
| GO:1901224 | positive regulation of NIK/NF-   | BP | 10 | 3  | 562 | 62  | 19809 | 2.57E-01 |
| GO:0045177 | apical part of cell              | CC | 4  | 4  | 562 | 91  | 19809 | 2.58E-01 |
| GO:0008092 | cytoskeletal protein binding     | MF | 5  | 4  | 562 | 91  | 19809 | 2.58E-01 |
| GO:0030032 | lamellipodium assembly           | BP | 8  | 2  | 562 | 35  | 19809 | 2.62E-01 |
| GO:0043200 | response to amino acid           | BP | 6  | 2  | 562 | 35  | 19809 | 2.62E-01 |
| GO:0042059 | negative regulation of epiderm   | BP | 10 | 2  | 562 | 35  | 19809 | 2.62E-01 |
| GO:0035924 | cellular response to vascular ei | BP | 8  | 2  | 562 | 35  | 19809 | 2.62E-01 |
| GO:1900026 | positive regulation of substrate | BP | 10 | 2  | 562 | 35  | 19809 | 2.62E-01 |
| GO:0003700 | DNA-binding transcription fac    | MF | 4  | 29 | 562 | 899 | 19809 | 2.63E-01 |
| GO:0006915 | apoptotic process                | BP | 6  | 23 | 562 | 700 | 19809 | 2.63E-01 |
| GO:0060071 | Wnt signaling pathway, planar    | BP | 9  | 4  | 562 | 92  | 19809 | 2.65E-01 |
| GO:0018107 | peptidyl-threonine phosphoryl:   | BP | 10 | 3  | 562 | 63  | 19809 | 2.65E-01 |
| GO:0043627 | response to estrogen             | BP | 4  | 3  | 562 | 63  | 19809 | 2.65E-01 |
| GO:0034605 | cellular response to heat        | BP | 6  | 3  | 562 | 63  | 19809 | 2.65E-01 |
| GO:0005777 | peroxisome                       | CC | 7  | 5  | 562 | 122 | 19809 | 2.65E-01 |
| GO:0001867 | complement activation, lectin j  | BP | 6  | 1  | 562 | 11  | 19809 | 2.71E-01 |
| GO:0045899 | positive regulation of RNA po    | BP | 8  | 1  | 562 | 11  | 19809 | 2.71E-01 |
| GO:0003995 | acyl-CoA dehydrogenase activ     | MF | 6  | 1  | 562 | 11  | 19809 | 2.71E-01 |
| GO:0015643 | toxic substance binding          | MF | 4  | 1  | 562 | 11  | 19809 | 2.71E-01 |
| GO:0006751 | glutathione catabolic process    | BP | 9  | 1  | 562 | 11  | 19809 | 2.71E-01 |
| GO:0035137 | hindlimb morphogenesis           | BP | 7  | 1  | 562 | 11  | 19809 | 2.71E-01 |
| GO:0001054 | RNA polymerase I activity        | MF | 10 | 1  | 562 | 11  | 19809 | 2.71E-01 |
| GO:0048143 | astrocyte activation             | BP | 6  | 1  | 562 | 11  | 19809 | 2.71E-01 |
| GO:0002221 | pattern recognition receptor sig | BP | 7  | 1  | 562 | 11  | 19809 | 2.71E-01 |
| GO:0060339 | negative regulation of type I in | BP | 10 | 1  | 562 | 11  | 19809 | 2.71E-01 |
| GO:0070933 | histone H4 deacetylation         | BP | 12 | 1  | 562 | 11  | 19809 | 2.71E-01 |
| GO:0090557 | establishment of endothelial in  | BP | 9  | 1  | 562 | 11  | 19809 | 2.71E-01 |
| GO:0060055 | angiogenesis involved in wour    | BP | 6  | 1  | 562 | 11  | 19809 | 2.71E-01 |
| GO:0005391 | sodium:potassium-exchanging      | MF | 11 | 1  | 562 | 11  | 19809 | 2.71E-01 |
| GO:0048935 | peripheral nervous system neu    | BP | 7  | 1  | 562 | 11  | 19809 | 2.71E-01 |
| GO:0051974 | negative regulation of telomer:  | BP | 8  | 1  | 562 | 11  | 19809 | 2.71E-01 |
| GO:0033691 | sialic acid binding              | MF | 7  | 1  | 562 | 11  | 19809 | 2.71E-01 |
| GO:0097386 | glial cell projection            | CC | 6  | 1  | 562 | 11  | 19809 | 2.71E-01 |
| GO:0035457 | cellular response to interferon- | BP | 8  | 1  | 562 | 11  | 19809 | 2.71E-01 |

|            |                                   |    |    |   |     |    |       |          |
|------------|-----------------------------------|----|----|---|-----|----|-------|----------|
| GO:0043030 | regulation of macrophage activ    | BP | 7  | 1 | 562 | 11 | 19809 | 2.71E-01 |
| GO:0030955 | potassium ion binding             | MF | 8  | 1 | 562 | 11 | 19809 | 2.71E-01 |
| GO:0042116 | macrophage activation             | BP | 7  | 1 | 562 | 11 | 19809 | 2.71E-01 |
| GO:0015279 | store-operated calcium channe     | MF | 9  | 1 | 562 | 11 | 19809 | 2.71E-01 |
| GO:0031253 | cell projection membrane          | CC | 5  | 1 | 562 | 11 | 19809 | 2.71E-01 |
| GO:2000637 | positive regulation of gene sile  | BP | 8  | 1 | 562 | 11 | 19809 | 2.71E-01 |
| GO:0060100 | positive regulation of phagocy    | BP | 9  | 1 | 562 | 11 | 19809 | 2.71E-01 |
| GO:0045176 | apical protein localization       | BP | 6  | 1 | 562 | 11 | 19809 | 2.71E-01 |
| GO:0048038 | quinone binding                   | MF | 5  | 1 | 562 | 11 | 19809 | 2.71E-01 |
| GO:0007168 | receptor guanylyl cyclase sign    | BP | 7  | 1 | 562 | 11 | 19809 | 2.71E-01 |
| GO:0150078 | positive regulation of neuroinf   | BP | 10 | 1 | 562 | 11 | 19809 | 2.71E-01 |
| GO:0048681 | negative regulation of axon reg   | BP | 8  | 1 | 562 | 11 | 19809 | 2.71E-01 |
| GO:0046135 | pyrimidine nucleoside cataboli    | BP | 10 | 1 | 562 | 11 | 19809 | 2.71E-01 |
| GO:0005742 | mitochondrial outer membrane      | CC | 6  | 1 | 562 | 11 | 19809 | 2.71E-01 |
| GO:0030033 | microvillus assembly              | BP | 8  | 1 | 562 | 11 | 19809 | 2.71E-01 |
| GO:0006048 | UDP-N-acetylglucosamine bio       | BP | 8  | 1 | 562 | 11 | 19809 | 2.71E-01 |
| GO:2000273 | positive regulation of signaling  | BP | 9  | 1 | 562 | 11 | 19809 | 2.71E-01 |
| GO:0003016 | respiratory system process        | BP | 5  | 1 | 562 | 11 | 19809 | 2.71E-01 |
| GO:0007256 | activation of JNKK activity       | BP | 14 | 1 | 562 | 11 | 19809 | 2.71E-01 |
| GO:0031665 | negative regulation of lipopoly   | BP | 8  | 1 | 562 | 11 | 19809 | 2.71E-01 |
| GO:0008199 | ferric iron binding               | MF | 9  | 1 | 562 | 11 | 19809 | 2.71E-01 |
| GO:0045723 | positive regulation of fatty acid | BP | 9  | 1 | 562 | 11 | 19809 | 2.71E-01 |
| GO:0004016 | adenylate cyclase activity        | MF | 5  | 1 | 562 | 11 | 19809 | 2.71E-01 |
| GO:0003094 | glomerular filtration             | BP | 7  | 1 | 562 | 11 | 19809 | 2.71E-01 |
| GO:0010738 | regulation of protein kinase A    | BP | 9  | 1 | 562 | 11 | 19809 | 2.71E-01 |
| GO:0072425 | signal transduction involved in   | BP | 9  | 1 | 562 | 11 | 19809 | 2.71E-01 |
| GO:0046512 | sphingosine biosynthetic proce    | BP | 9  | 1 | 562 | 11 | 19809 | 2.71E-01 |
| GO:0001012 | RNA polymerase II regulatory      | MF | 8  | 1 | 562 | 11 | 19809 | 2.71E-01 |
| GO:0019371 | cyclooxygenase pathway            | BP | 12 | 1 | 562 | 11 | 19809 | 2.71E-01 |
| GO:0071203 | WASH complex                      | CC | 4  | 1 | 562 | 11 | 19809 | 2.71E-01 |
| GO:0043129 | surfactant homeostasis            | BP | 9  | 1 | 562 | 11 | 19809 | 2.71E-01 |
| GO:0060306 | regulation of membrane repola     | BP | 9  | 1 | 562 | 11 | 19809 | 2.71E-01 |
| GO:0000050 | urea cycle                        | BP | 8  | 1 | 562 | 11 | 19809 | 2.71E-01 |
| GO:0090150 | establishment of protein locali   | BP | 7  | 1 | 562 | 11 | 19809 | 2.71E-01 |
| GO:0002281 | macrophage activation involve     | BP | 8  | 1 | 562 | 11 | 19809 | 2.71E-01 |
| GO:1901380 | negative regulation of potassiu   | BP | 11 | 1 | 562 | 11 | 19809 | 2.71E-01 |
| GO:1901612 | cardiolipin binding               | MF | 7  | 1 | 562 | 11 | 19809 | 2.71E-01 |
| GO:0001893 | maternal placenta developmen      | BP | 5  | 1 | 562 | 11 | 19809 | 2.71E-01 |
| GO:0043616 | keratinocyte proliferation        | BP | 5  | 1 | 562 | 11 | 19809 | 2.71E-01 |
| GO:0060253 | negative regulation of glial cel  | BP | 8  | 1 | 562 | 11 | 19809 | 2.71E-01 |
| GO:0099173 | postsynapse organization          | BP | 5  | 1 | 562 | 11 | 19809 | 2.71E-01 |
| GO:0010737 | protein kinase A signaling        | BP | 6  | 1 | 562 | 11 | 19809 | 2.71E-01 |
| GO:0060009 | Sertoli cell development          | BP | 7  | 1 | 562 | 11 | 19809 | 2.71E-01 |
| GO:0045577 | regulation of B cell differentia  | BP | 9  | 1 | 562 | 11 | 19809 | 2.71E-01 |
| GO:0030296 | protein tyrosine kinase activat   | MF | 8  | 1 | 562 | 11 | 19809 | 2.71E-01 |
| GO:0016918 | retinal binding                   | MF | 7  | 1 | 562 | 11 | 19809 | 2.71E-01 |
| GO:0034379 | very-low-density lipoprotein p    | BP | 9  | 1 | 562 | 11 | 19809 | 2.71E-01 |
| GO:0045637 | regulation of myeloid cell diff   | BP | 7  | 1 | 562 | 11 | 19809 | 2.71E-01 |
| GO:0009048 | dosage compensation by inacti     | BP | 10 | 1 | 562 | 11 | 19809 | 2.71E-01 |
| GO:0060452 | positive regulation of cardiac r  | BP | 10 | 1 | 562 | 11 | 19809 | 2.71E-01 |

|            |                                   |    |    |    |     |     |       |          |
|------------|-----------------------------------|----|----|----|-----|-----|-------|----------|
| GO:0022407 | regulation of cell-cell adhesior  | BP | 6  | 1  | 562 | 11  | 19809 | 2.71E-01 |
| GO:0033327 | Leydig cell differentiation       | BP | 5  | 1  | 562 | 11  | 19809 | 2.71E-01 |
| GO:0009314 | response to radiation             | BP | 5  | 2  | 562 | 36  | 19809 | 2.72E-01 |
| GO:0007369 | gastrulation                      | BP | 6  | 2  | 562 | 36  | 19809 | 2.72E-01 |
| GO:0030173 | integral component of Golgi m     | CC | 7  | 3  | 562 | 64  | 19809 | 2.73E-01 |
| GO:0045165 | cell fate commitment              | BP | 5  | 3  | 562 | 64  | 19809 | 2.73E-01 |
| GO:0051082 | unfolded protein binding          | MF | 5  | 5  | 562 | 124 | 19809 | 2.76E-01 |
| GO:0000902 | cell morphogenesis                | BP | 6  | 4  | 562 | 94  | 19809 | 2.77E-01 |
| GO:0045596 | negative regulation of cell diff  | BP | 7  | 3  | 562 | 65  | 19809 | 2.81E-01 |
| GO:0019898 | extrinsic component of membr      | CC | 4  | 3  | 562 | 65  | 19809 | 2.81E-01 |
| GO:0030374 | nuclear receptor transcription c  | MF | 6  | 3  | 562 | 65  | 19809 | 2.81E-01 |
| GO:0001937 | negative regulation of endothe    | BP | 9  | 2  | 562 | 37  | 19809 | 2.83E-01 |
| GO:0007223 | Wnt signaling pathway, calciu     | BP | 9  | 2  | 562 | 37  | 19809 | 2.83E-01 |
| GO:1901998 | toxin transport                   | BP | 6  | 2  | 562 | 37  | 19809 | 2.83E-01 |
| GO:0000987 | proximal promoter sequence-sj     | MF | 9  | 2  | 562 | 37  | 19809 | 2.83E-01 |
| GO:0010667 | negative regulation of cardiac :  | BP | 12 | 2  | 562 | 37  | 19809 | 2.83E-01 |
| GO:0072593 | reactive oxygen species metab     | BP | 5  | 2  | 562 | 37  | 19809 | 2.83E-01 |
| GO:0010634 | positive regulation of epithelia  | BP | 9  | 2  | 562 | 37  | 19809 | 2.83E-01 |
| GO:0019888 | protein phosphatase regulator :   | MF | 6  | 2  | 562 | 37  | 19809 | 2.83E-01 |
| GO:0031214 | biomineral tissue development     | BP | 6  | 2  | 562 | 37  | 19809 | 2.83E-01 |
| GO:0007005 | mitochondrion organization        | BP | 6  | 4  | 562 | 95  | 19809 | 2.84E-01 |
| GO:0000122 | negative regulation of transcrip  | BP | 10 | 26 | 562 | 811 | 19809 | 2.88E-01 |
| GO:0050679 | positive regulation of epithelia  | BP | 8  | 3  | 562 | 66  | 19809 | 2.88E-01 |
| GO:0060079 | excitatory postsynaptic potenti   | BP | 7  | 3  | 562 | 66  | 19809 | 2.88E-01 |
| GO:0043005 | neuron projection                 | CC | 5  | 14 | 562 | 414 | 19809 | 2.89E-01 |
| GO:0032869 | cellular response to insulin stir | BP | 8  | 4  | 562 | 96  | 19809 | 2.90E-01 |
| GO:0002237 | response to molecule of bacter    | BP | 6  | 1  | 562 | 12  | 19809 | 2.92E-01 |
| GO:1904668 | positive regulation of ubiquitir  | BP | 13 | 1  | 562 | 12  | 19809 | 2.92E-01 |
| GO:0070410 | co-SMAD binding                   | MF | 6  | 1  | 562 | 12  | 19809 | 2.92E-01 |
| GO:0040015 | negative regulation of multice    | BP | 8  | 1  | 562 | 12  | 19809 | 2.92E-01 |
| GO:0004126 | cytidine deaminase activity       | MF | 7  | 1  | 562 | 12  | 19809 | 2.92E-01 |
| GO:0043586 | tongue development                | BP | 7  | 1  | 562 | 12  | 19809 | 2.92E-01 |
| GO:0032026 | response to magnesium ion         | BP | 7  | 1  | 562 | 12  | 19809 | 2.92E-01 |
| GO:2001171 | positive regulation of ATP bio    | BP | 12 | 1  | 562 | 12  | 19809 | 2.92E-01 |
| GO:0031994 | insulin-like growth factor I bin  | MF | 7  | 1  | 562 | 12  | 19809 | 2.92E-01 |
| GO:0016790 | thiolester hydrolase activity     | MF | 6  | 1  | 562 | 12  | 19809 | 2.92E-01 |
| GO:0043031 | negative regulation of macrop     | BP | 8  | 1  | 562 | 12  | 19809 | 2.92E-01 |
| GO:0051481 | negative regulation of cytosoli   | BP | 13 | 1  | 562 | 12  | 19809 | 2.92E-01 |
| GO:0030212 | hyaluronan metabolic process      | BP | 8  | 1  | 562 | 12  | 19809 | 2.92E-01 |
| GO:0050927 | positive regulation of positive   | BP | 9  | 1  | 562 | 12  | 19809 | 2.92E-01 |
| GO:0004033 | aldo-keto reductase (NADP) a      | MF | 7  | 1  | 562 | 12  | 19809 | 2.92E-01 |
| GO:0005845 | mRNA cap binding complex          | CC | 5  | 1  | 562 | 12  | 19809 | 2.92E-01 |
| GO:0001945 | lymph vessel development          | BP | 5  | 1  | 562 | 12  | 19809 | 2.92E-01 |
| GO:0090161 | Golgi ribbon formation            | BP | 7  | 1  | 562 | 12  | 19809 | 2.92E-01 |
| GO:0030208 | dermatan sulfate biosynthetic p   | BP | 9  | 1  | 562 | 12  | 19809 | 2.92E-01 |
| GO:0019363 | pyridine nucleotide biosynthes    | BP | 8  | 1  | 562 | 12  | 19809 | 2.92E-01 |
| GO:0032434 | regulation of proteasomal ubiq    | BP | 11 | 1  | 562 | 12  | 19809 | 2.92E-01 |
| GO:0003181 | atrioventricular valve morphog    | BP | 6  | 1  | 562 | 12  | 19809 | 2.92E-01 |
| GO:0005751 | mitochondrial respiratory chai    | CC | 6  | 1  | 562 | 12  | 19809 | 2.92E-01 |
| GO:0007096 | regulation of exit from mitosis   | BP | 9  | 1  | 562 | 12  | 19809 | 2.92E-01 |

|            |                                   |    |    |   |     |    |       |          |
|------------|-----------------------------------|----|----|---|-----|----|-------|----------|
| GO:0010818 | T cell chemotaxis                 | BP | 7  | 1 | 562 | 12 | 19809 | 2.92E-01 |
| GO:0060391 | positive regulation of SMAD p     | BP | 10 | 1 | 562 | 12 | 19809 | 2.92E-01 |
| GO:1902282 | voltage-gated potassium chann     | MF | 11 | 1 | 562 | 12 | 19809 | 2.92E-01 |
| GO:0042592 | homeostatic process               | BP | 5  | 1 | 562 | 12 | 19809 | 2.92E-01 |
| GO:0048016 | inositol phosphate-mediated si    | BP | 7  | 1 | 562 | 12 | 19809 | 2.92E-01 |
| GO:0003215 | cardiac right ventricle morpho    | BP | 7  | 1 | 562 | 12 | 19809 | 2.92E-01 |
| GO:0048407 | platelet-derived growth factor    | MF | 6  | 1 | 562 | 12 | 19809 | 2.92E-01 |
| GO:0071679 | commissural neuron axon guid      | BP | 7  | 1 | 562 | 12 | 19809 | 2.92E-01 |
| GO:0031953 | negative regulation of protein s  | BP | 11 | 1 | 562 | 12 | 19809 | 2.92E-01 |
| GO:0071372 | cellular response to follicle-sti | BP | 8  | 1 | 562 | 12 | 19809 | 2.92E-01 |
| GO:0097153 | cysteine-type endopeptidase ac    | MF | 9  | 1 | 562 | 12 | 19809 | 2.92E-01 |
| GO:0006596 | polyamine biosynthetic proces     | BP | 10 | 1 | 562 | 12 | 19809 | 2.92E-01 |
| GO:0016810 | hydrolase activity, acting on ca  | MF | 5  | 1 | 562 | 12 | 19809 | 2.92E-01 |
| GO:0046785 | microtubule polymerization        | BP | 9  | 1 | 562 | 12 | 19809 | 2.92E-01 |
| GO:0043229 | intracellular organelle           | CC | 4  | 1 | 562 | 12 | 19809 | 2.92E-01 |
| GO:0016554 | cytidine to uridine editing       | BP | 11 | 1 | 562 | 12 | 19809 | 2.92E-01 |
| GO:0051549 | positive regulation of keratino   | BP | 10 | 1 | 562 | 12 | 19809 | 2.92E-01 |
| GO:0045410 | positive regulation of interleuk  | BP | 9  | 1 | 562 | 12 | 19809 | 2.92E-01 |
| GO:2001022 | positive regulation of response   | BP | 7  | 1 | 562 | 12 | 19809 | 2.92E-01 |
| GO:0015867 | ATP transport                     | BP | 9  | 1 | 562 | 12 | 19809 | 2.92E-01 |
| GO:1900242 | regulation of synaptic vesicle e  | BP | 8  | 1 | 562 | 12 | 19809 | 2.92E-01 |
| GO:0016818 | hydrolase activity, acting on ac  | MF | 6  | 1 | 562 | 12 | 19809 | 2.92E-01 |
| GO:0060394 | negative regulation of pathway    | BP | 11 | 1 | 562 | 12 | 19809 | 2.92E-01 |
| GO:0030203 | glycosaminoglycan metabolic p     | BP | 7  | 1 | 562 | 12 | 19809 | 2.92E-01 |
| GO:0045830 | positive regulation of isotype s  | BP | 10 | 1 | 562 | 12 | 19809 | 2.92E-01 |
| GO:0072687 | meiotic spindle                   | CC | 7  | 1 | 562 | 12 | 19809 | 2.92E-01 |
| GO:0016290 | palmitoyl-CoA hydrolase activ     | MF | 9  | 1 | 562 | 12 | 19809 | 2.92E-01 |
| GO:0014075 | response to amine                 | BP | 7  | 1 | 562 | 12 | 19809 | 2.92E-01 |
| GO:0033558 | protein deacetylase activity      | MF | 6  | 1 | 562 | 12 | 19809 | 2.92E-01 |
| GO:0004115 | 3',5'-cyclic-AMP phosphodi        | MF | 10 | 1 | 562 | 12 | 19809 | 2.92E-01 |
| GO:0043922 | negative regulation by host of    | BP | 10 | 1 | 562 | 12 | 19809 | 2.92E-01 |
| GO:0033700 | phospholipid efflux               | BP | 9  | 1 | 562 | 12 | 19809 | 2.92E-01 |
| GO:0043220 | Schmidt-Lanterman incisure        | CC | 4  | 1 | 562 | 12 | 19809 | 2.92E-01 |
| GO:0005890 | sodium:potassium-exchanging       | CC | 8  | 1 | 562 | 12 | 19809 | 2.92E-01 |
| GO:0038180 | nerve growth factor signaling p   | BP | 7  | 1 | 562 | 12 | 19809 | 2.92E-01 |
| GO:0004861 | cyclin-dependent protein serin    | MF | 8  | 1 | 562 | 12 | 19809 | 2.92E-01 |
| GO:0009972 | cytidine deamination              | BP | 13 | 1 | 562 | 12 | 19809 | 2.92E-01 |
| GO:0071564 | npBAF complex                     | CC | 8  | 1 | 562 | 12 | 19809 | 2.92E-01 |
| GO:0098915 | membrane repolarization durin     | BP | 11 | 1 | 562 | 12 | 19809 | 2.92E-01 |
| GO:0005736 | RNA polymerase I complex          | CC | 7  | 1 | 562 | 12 | 19809 | 2.92E-01 |
| GO:1904385 | cellular response to angiotensi   | BP | 8  | 1 | 562 | 12 | 19809 | 2.92E-01 |
| GO:0042770 | signal transduction in response   | BP | 7  | 1 | 562 | 12 | 19809 | 2.92E-01 |
| GO:0009058 | biosynthetic process              | BP | 4  | 2 | 562 | 38 | 19809 | 2.93E-01 |
| GO:0006493 | protein O-linked glycosylation    | BP | 10 | 2 | 562 | 38 | 19809 | 2.93E-01 |
| GO:0004601 | peroxidase activity               | MF | 4  | 2 | 562 | 38 | 19809 | 2.93E-01 |
| GO:0043531 | ADP binding                       | MF | 9  | 2 | 562 | 38 | 19809 | 2.93E-01 |
| GO:0048487 | beta-tubulin binding              | MF | 7  | 2 | 562 | 38 | 19809 | 2.93E-01 |
| GO:0032467 | positive regulation of cytokine   | BP | 9  | 2 | 562 | 38 | 19809 | 2.93E-01 |
| GO:0030049 | muscle filament sliding           | BP | 8  | 2 | 562 | 38 | 19809 | 2.93E-01 |
| GO:0071333 | cellular response to glucose sti  | BP | 10 | 3 | 562 | 67 | 19809 | 2.96E-01 |

|            |                                   |    |    |   |     |     |       |          |
|------------|-----------------------------------|----|----|---|-----|-----|-------|----------|
| GO:0005791 | rough endoplasmic reticulum       | CC | 7  | 3 | 562 | 67  | 19809 | 2.96E-01 |
| GO:0051384 | response to glucocorticoid        | BP | 8  | 3 | 562 | 67  | 19809 | 2.96E-01 |
| GO:0016791 | phosphatase activity              | MF | 7  | 5 | 562 | 128 | 19809 | 2.98E-01 |
| GO:0001726 | ruffle                            | CC | 6  | 4 | 562 | 98  | 19809 | 3.03E-01 |
| GO:1902036 | regulation of hematopoietic ste   | BP | 8  | 3 | 562 | 68  | 19809 | 3.04E-01 |
| GO:0006487 | protein N-linked glycosylation    | BP | 10 | 2 | 562 | 39  | 19809 | 3.04E-01 |
| GO:0031226 | intrinsic component of plasma     | CC | 5  | 2 | 562 | 39  | 19809 | 3.04E-01 |
| GO:0046034 | ATP metabolic process             | BP | 4  | 2 | 562 | 39  | 19809 | 3.04E-01 |
| GO:0043491 | protein kinase B signaling        | BP | 6  | 2 | 562 | 39  | 19809 | 3.04E-01 |
| GO:0070555 | response to interleukin-1         | BP | 7  | 2 | 562 | 39  | 19809 | 3.04E-01 |
| GO:0005109 | frizzled binding                  | MF | 7  | 2 | 562 | 39  | 19809 | 3.04E-01 |
| GO:0051260 | protein homooligomerization       | BP | 8  | 8 | 562 | 225 | 19809 | 3.08E-01 |
| GO:0000082 | G1/S transition of mitotic cell   | BP | 7  | 4 | 562 | 99  | 19809 | 3.09E-01 |
| GO:0018108 | peptidyl-tyrosine phosphorylat    | BP | 10 | 5 | 562 | 130 | 19809 | 3.09E-01 |
| GO:0070588 | calcium ion transmembrane tra     | BP | 11 | 5 | 562 | 130 | 19809 | 3.09E-01 |
| GO:0035690 | cellular response to drug         | BP | 6  | 3 | 562 | 69  | 19809 | 3.12E-01 |
| GO:0006986 | response to unfolded protein      | BP | 6  | 3 | 562 | 69  | 19809 | 3.12E-01 |
| GO:0043020 | NADPH oxidase complex             | CC | 6  | 1 | 562 | 13  | 19809 | 3.12E-01 |
| GO:0004629 | phospholipase C activity          | MF | 8  | 1 | 562 | 13  | 19809 | 3.12E-01 |
| GO:0060389 | pathway-restricted SMAD pro       | BP | 10 | 1 | 562 | 13  | 19809 | 3.12E-01 |
| GO:0045086 | positive regulation of interleuk  | BP | 9  | 1 | 562 | 13  | 19809 | 3.12E-01 |
| GO:0047617 | acyl-CoA hydrolase activity       | MF | 8  | 1 | 562 | 13  | 19809 | 3.12E-01 |
| GO:0045744 | negative regulation of G protei   | BP | 9  | 1 | 562 | 13  | 19809 | 3.12E-01 |
| GO:0060674 | placenta blood vessel developr    | BP | 6  | 1 | 562 | 13  | 19809 | 3.12E-01 |
| GO:0034214 | protein hexamerization            | BP | 8  | 1 | 562 | 13  | 19809 | 3.12E-01 |
| GO:0021756 | striatum development              | BP | 5  | 1 | 562 | 13  | 19809 | 3.12E-01 |
| GO:0008093 | cytoskeletal adaptor activity     | MF | 6  | 1 | 562 | 13  | 19809 | 3.12E-01 |
| GO:0060993 | kidney morphogenesis              | BP | 6  | 1 | 562 | 13  | 19809 | 3.12E-01 |
| GO:0071425 | hematopoietic stem cell prolif    | BP | 5  | 1 | 562 | 13  | 19809 | 3.12E-01 |
| GO:0070306 | lens fiber cell differentiation   | BP | 7  | 1 | 562 | 13  | 19809 | 3.12E-01 |
| GO:0060397 | growth hormone receptor sign      | BP | 9  | 1 | 562 | 13  | 19809 | 3.12E-01 |
| GO:0032479 | regulation of type I interferon j | BP | 7  | 1 | 562 | 13  | 19809 | 3.12E-01 |
| GO:0045806 | negative regulation of endocyt    | BP | 8  | 1 | 562 | 13  | 19809 | 3.12E-01 |
| GO:0097067 | cellular response to thyroid ho   | BP | 7  | 1 | 562 | 13  | 19809 | 3.12E-01 |
| GO:0061029 | eyelid development in camera-     | BP | 5  | 1 | 562 | 13  | 19809 | 3.12E-01 |
| GO:0070679 | inositol 1,4,5 trisphosphate bir  | MF | 6  | 1 | 562 | 13  | 19809 | 3.12E-01 |
| GO:0014902 | myotube differentiation           | BP | 8  | 1 | 562 | 13  | 19809 | 3.12E-01 |
| GO:0044237 | cellular metabolic process        | BP | 4  | 1 | 562 | 13  | 19809 | 3.12E-01 |
| GO:0010524 | positive regulation of calcium    | BP | 14 | 1 | 562 | 13  | 19809 | 3.12E-01 |
| GO:0008645 | hexose transmembrane transpc      | BP | 10 | 1 | 562 | 13  | 19809 | 3.12E-01 |
| GO:2000146 | negative regulation of cell mot   | BP | 7  | 1 | 562 | 13  | 19809 | 3.12E-01 |
| GO:0070528 | protein kinase C signaling        | BP | 6  | 1 | 562 | 13  | 19809 | 3.12E-01 |
| GO:1900271 | regulation of long-term synapt    | BP | 10 | 1 | 562 | 13  | 19809 | 3.12E-01 |
| GO:0030516 | regulation of axon extension      | BP | 7  | 1 | 562 | 13  | 19809 | 3.12E-01 |
| GO:0007171 | activation of transmembrane re    | BP | 13 | 1 | 562 | 13  | 19809 | 3.12E-01 |
| GO:0031529 | ruffle organization               | BP | 7  | 1 | 562 | 13  | 19809 | 3.12E-01 |
| GO:0008553 | proton-exporting ATPase activ     | MF | 10 | 1 | 562 | 13  | 19809 | 3.12E-01 |
| GO:0019430 | removal of superoxide radicals    | BP | 7  | 1 | 562 | 13  | 19809 | 3.12E-01 |
| GO:0030007 | cellular potassium ion homeos     | BP | 11 | 1 | 562 | 13  | 19809 | 3.12E-01 |
| GO:0042581 | specific granule                  | CC | 9  | 1 | 562 | 13  | 19809 | 3.12E-01 |

|            |                                   |    |    |    |     |      |       |          |
|------------|-----------------------------------|----|----|----|-----|------|-------|----------|
| GO:0045779 | negative regulation of bone res   | BP | 9  | 1  | 562 | 13   | 19809 | 3.12E-01 |
| GO:0036376 | sodium ion export across plasr    | BP | 11 | 1  | 562 | 13   | 19809 | 3.12E-01 |
| GO:0001967 | suckling behavior                 | BP | 5  | 1  | 562 | 13   | 19809 | 3.12E-01 |
| GO:0050708 | regulation of protein secretion   | BP | 9  | 1  | 562 | 13   | 19809 | 3.12E-01 |
| GO:0051489 | regulation of filopodium assen    | BP | 10 | 1  | 562 | 13   | 19809 | 3.12E-01 |
| GO:2000772 | regulation of cellular senescen   | BP | 7  | 1  | 562 | 13   | 19809 | 3.12E-01 |
| GO:0042641 | actomyosin                        | CC | 6  | 1  | 562 | 13   | 19809 | 3.12E-01 |
| GO:0005885 | Arp2/3 protein complex            | CC | 4  | 1  | 562 | 13   | 19809 | 3.12E-01 |
| GO:0003323 | type B pancreatic cell developi   | BP | 9  | 1  | 562 | 13   | 19809 | 3.12E-01 |
| GO:0032230 | positive regulation of synaptic   | BP | 10 | 1  | 562 | 13   | 19809 | 3.12E-01 |
| GO:0060074 | synapse maturation                | BP | 5  | 1  | 562 | 13   | 19809 | 3.12E-01 |
| GO:0016024 | CDP-diacylglycerol biosynthesi    | BP | 11 | 1  | 562 | 13   | 19809 | 3.12E-01 |
| GO:0014912 | negative regulation of smooth     | BP | 9  | 1  | 562 | 13   | 19809 | 3.12E-01 |
| GO:0050713 | negative regulation of interleuk  | BP | 10 | 1  | 562 | 13   | 19809 | 3.12E-01 |
| GO:0042761 | very long-chain fatty acid bios   | BP | 11 | 1  | 562 | 13   | 19809 | 3.12E-01 |
| GO:0035308 | negative regulation of protein c  | BP | 10 | 1  | 562 | 13   | 19809 | 3.12E-01 |
| GO:0048246 | macrophage chemotaxis             | BP | 6  | 1  | 562 | 13   | 19809 | 3.12E-01 |
| GO:0045078 | positive regulation of interfero  | BP | 9  | 1  | 562 | 13   | 19809 | 3.12E-01 |
| GO:2001256 | regulation of store-operated ca   | BP | 10 | 1  | 562 | 13   | 19809 | 3.12E-01 |
| GO:0006809 | nitric oxide biosynthetic proce   | BP | 8  | 1  | 562 | 13   | 19809 | 3.12E-01 |
| GO:0017017 | MAP kinase tyrosine/serine/th     | MF | 10 | 1  | 562 | 13   | 19809 | 3.12E-01 |
| GO:2000678 | negative regulation of transcrip  | BP | 8  | 1  | 562 | 13   | 19809 | 3.12E-01 |
| GO:0008210 | estrogen metabolic process        | BP | 7  | 1  | 562 | 13   | 19809 | 3.12E-01 |
| GO:0048333 | mesodermal cell differentiatio    | BP | 6  | 1  | 562 | 13   | 19809 | 3.12E-01 |
| GO:0090399 | replicative senescence            | BP | 6  | 1  | 562 | 13   | 19809 | 3.12E-01 |
| GO:2000009 | negative regulation of protein l  | BP | 7  | 1  | 562 | 13   | 19809 | 3.12E-01 |
| GO:0048484 | enteric nervous system develop    | BP | 6  | 1  | 562 | 13   | 19809 | 3.12E-01 |
| GO:0031076 | embryonic camera-type eye de      | BP | 9  | 1  | 562 | 13   | 19809 | 3.12E-01 |
| GO:1900272 | negative regulation of long-ter   | BP | 6  | 1  | 562 | 13   | 19809 | 3.12E-01 |
| GO:0009303 | rRNA transcription                | BP | 10 | 1  | 562 | 13   | 19809 | 3.12E-01 |
| GO:0061052 | negative regulation of cell grov  | BP | 11 | 1  | 562 | 13   | 19809 | 3.12E-01 |
| GO:0070986 | left/right axis specification     | BP | 6  | 1  | 562 | 13   | 19809 | 3.12E-01 |
| GO:1902894 | negative regulation of pri-miR    | BP | 11 | 1  | 562 | 13   | 19809 | 3.12E-01 |
| GO:0032233 | positive regulation of actin fila | BP | 7  | 1  | 562 | 13   | 19809 | 3.12E-01 |
| GO:0010839 | negative regulation of keratino   | BP | 9  | 1  | 562 | 13   | 19809 | 3.12E-01 |
| GO:0008154 | actin polymerization or depoly    | BP | 7  | 1  | 562 | 13   | 19809 | 3.12E-01 |
| GO:0043281 | regulation of cysteine-type enc   | BP | 9  | 1  | 562 | 13   | 19809 | 3.12E-01 |
| GO:0071257 | cellular response to electrical s | BP | 6  | 1  | 562 | 13   | 19809 | 3.12E-01 |
| GO:1901216 | positive regulation of neuron d   | BP | 8  | 2  | 562 | 40   | 19809 | 3.14E-01 |
| GO:0007346 | regulation of mitotic cell cycle  | BP | 7  | 2  | 562 | 40   | 19809 | 3.14E-01 |
| GO:0031623 | receptor internalization          | BP | 9  | 2  | 562 | 40   | 19809 | 3.14E-01 |
| GO:2001244 | positive regulation of intrinsic  | BP | 10 | 2  | 562 | 40   | 19809 | 3.14E-01 |
| GO:0045071 | negative regulation of viral get  | BP | 10 | 2  | 562 | 40   | 19809 | 3.14E-01 |
| GO:0007420 | brain development                 | BP | 6  | 9  | 562 | 259  | 19809 | 3.15E-01 |
| GO:0004672 | protein kinase activity           | MF | 7  | 18 | 562 | 556  | 19809 | 3.16E-01 |
| GO:0070301 | cellular response to hydrogen p   | BP | 8  | 3  | 562 | 70   | 19809 | 3.19E-01 |
| GO:0016323 | basolateral plasma membrane       | CC | 5  | 7  | 562 | 196  | 19809 | 3.22E-01 |
| GO:0000981 | DNA-binding transcription fac     | MF | 5  | 47 | 562 | 1541 | 19809 | 3.22E-01 |
| GO:0005783 | endoplasmic reticulum             | CC | 6  | 46 | 562 | 1508 | 19809 | 3.24E-01 |
| GO:0007190 | activation of adenylate cyclase   | BP | 6  | 2  | 562 | 41   | 19809 | 3.25E-01 |

|            |                                   |    |    |    |     |     |       |          |
|------------|-----------------------------------|----|----|----|-----|-----|-------|----------|
| GO:1904646 | cellular response to amyloid-b    | BP | 9  | 2  | 562 | 41  | 19809 | 3.25E-01 |
| GO:0009566 | fertilization                     | BP | 4  | 2  | 562 | 41  | 19809 | 3.25E-01 |
| GO:0008528 | G protein-coupled peptide rece    | MF | 6  | 2  | 562 | 41  | 19809 | 3.25E-01 |
| GO:0030020 | extracellular matrix structural   | MF | 5  | 2  | 562 | 41  | 19809 | 3.25E-01 |
| GO:0004518 | nuclease activity                 | MF | 6  | 5  | 562 | 133 | 19809 | 3.26E-01 |
| GO:0016853 | isomerase activity                | MF | 4  | 5  | 562 | 133 | 19809 | 3.26E-01 |
| GO:0043231 | intracellular membrane-bound      | CC | 5  | 25 | 562 | 795 | 19809 | 3.26E-01 |
| GO:0035725 | sodium ion transmembrane tra      | BP | 10 | 3  | 562 | 71  | 19809 | 3.27E-01 |
| GO:0036464 | cytoplasmic ribonucleoprotein     | CC | 7  | 3  | 562 | 71  | 19809 | 3.27E-01 |
| GO:0032956 | regulation of actin cytoskeleto   | BP | 7  | 3  | 562 | 71  | 19809 | 3.27E-01 |
| GO:0004725 | protein tyrosine phosphatase a    | MF | 9  | 4  | 562 | 102 | 19809 | 3.29E-01 |
| GO:0030141 | secretory granule                 | CC | 8  | 4  | 562 | 102 | 19809 | 3.29E-01 |
| GO:0005622 | intracellular                     | CC | 4  | 23 | 562 | 729 | 19809 | 3.30E-01 |
| GO:0060416 | response to growth hormone        | BP | 7  | 1  | 562 | 14  | 19809 | 3.32E-01 |
| GO:0070403 | NAD+ binding                      | MF | 6  | 1  | 562 | 14  | 19809 | 3.32E-01 |
| GO:0043149 | stress fiber assembly             | BP | 8  | 1  | 562 | 14  | 19809 | 3.32E-01 |
| GO:0043023 | ribosomal large subunit bindin    | MF | 6  | 1  | 562 | 14  | 19809 | 3.32E-01 |
| GO:0043274 | phospholipase binding             | MF | 6  | 1  | 562 | 14  | 19809 | 3.32E-01 |
| GO:1902043 | positive regulation of extrinsic  | BP | 11 | 1  | 562 | 14  | 19809 | 3.32E-01 |
| GO:0060411 | cardiac septum morphogenesis      | BP | 5  | 1  | 562 | 14  | 19809 | 3.32E-01 |
| GO:0042551 | neuron maturation                 | BP | 6  | 1  | 562 | 14  | 19809 | 3.32E-01 |
| GO:0035925 | mRNA 3'-UTR AU-rich region        | MF | 9  | 1  | 562 | 14  | 19809 | 3.32E-01 |
| GO:0010952 | positive regulation of peptidas   | BP | 10 | 1  | 562 | 14  | 19809 | 3.32E-01 |
| GO:0005095 | GTPase inhibitor activity         | MF | 6  | 1  | 562 | 14  | 19809 | 3.32E-01 |
| GO:0033162 | melanosome membrane               | CC | 7  | 1  | 562 | 14  | 19809 | 3.32E-01 |
| GO:0042574 | retinal metabolic process         | BP | 11 | 1  | 562 | 14  | 19809 | 3.32E-01 |
| GO:0009312 | oligosaccharide biosynthetic p    | BP | 7  | 1  | 562 | 14  | 19809 | 3.32E-01 |
| GO:0003085 | negative regulation of systemic   | BP | 7  | 1  | 562 | 14  | 19809 | 3.32E-01 |
| GO:0061157 | mRNA destabilization              | BP | 11 | 1  | 562 | 14  | 19809 | 3.32E-01 |
| GO:0002687 | positive regulation of leukocyt   | BP | 7  | 1  | 562 | 14  | 19809 | 3.32E-01 |
| GO:0031089 | platelet dense granule lumen      | CC | 8  | 1  | 562 | 14  | 19809 | 3.32E-01 |
| GO:0019841 | retinol binding                   | MF | 7  | 1  | 562 | 14  | 19809 | 3.32E-01 |
| GO:0086064 | cell communication by electric    | BP | 6  | 1  | 562 | 14  | 19809 | 3.32E-01 |
| GO:0046039 | GTP metabolic process             | BP | 11 | 1  | 562 | 14  | 19809 | 3.32E-01 |
| GO:0007035 | vacuolar acidification            | BP | 13 | 1  | 562 | 14  | 19809 | 3.32E-01 |
| GO:0031936 | negative regulation of chromatin  | BP | 10 | 1  | 562 | 14  | 19809 | 3.32E-01 |
| GO:0021954 | central nervous system neuron     | BP | 7  | 1  | 562 | 14  | 19809 | 3.32E-01 |
| GO:0031573 | intra-S DNA damage checkpoi       | BP | 9  | 1  | 562 | 14  | 19809 | 3.32E-01 |
| GO:1903351 | cellular response to dopamine     | BP | 7  | 1  | 562 | 14  | 19809 | 3.32E-01 |
| GO:0005243 | gap junction channel activity     | MF | 8  | 1  | 562 | 14  | 19809 | 3.32E-01 |
| GO:0006071 | glycerol metabolic process        | BP | 8  | 1  | 562 | 14  | 19809 | 3.32E-01 |
| GO:0031432 | titin binding                     | MF | 6  | 1  | 562 | 14  | 19809 | 3.32E-01 |
| GO:0060402 | calcium ion transport into cyto   | BP | 14 | 1  | 562 | 14  | 19809 | 3.32E-01 |
| GO:0051279 | regulation of release of seques   | BP | 7  | 1  | 562 | 14  | 19809 | 3.32E-01 |
| GO:0050673 | epithelial cell proliferation     | BP | 4  | 1  | 562 | 14  | 19809 | 3.32E-01 |
| GO:0016772 | transferase activity, transferrin | MF | 5  | 1  | 562 | 14  | 19809 | 3.32E-01 |
| GO:0048009 | insulin-like growth factor recej  | BP | 8  | 1  | 562 | 14  | 19809 | 3.32E-01 |
| GO:0005003 | ephrin receptor activity          | MF | 10 | 1  | 562 | 14  | 19809 | 3.32E-01 |
| GO:0060038 | cardiac muscle cell proliferatic  | BP | 6  | 1  | 562 | 14  | 19809 | 3.32E-01 |
| GO:0010248 | establishment or maintenance      | BP | 8  | 1  | 562 | 14  | 19809 | 3.32E-01 |



|            |                                  |    |    |    |     |      |       |          |
|------------|----------------------------------|----|----|----|-----|------|-------|----------|
| GO:0002504 | antigen processing and present   | BP | 5  | 1  | 562 | 14   | 19809 | 3.32E-01 |
| GO:0043249 | erythrocyte maturation           | BP | 6  | 1  | 562 | 14   | 19809 | 3.32E-01 |
| GO:0010759 | positive regulation of macroph   | BP | 9  | 1  | 562 | 14   | 19809 | 3.32E-01 |
| GO:0009435 | NAD biosynthetic process         | BP | 10 | 1  | 562 | 14   | 19809 | 3.32E-01 |
| GO:0010954 | positive regulation of protein f | BP | 10 | 1  | 562 | 14   | 19809 | 3.32E-01 |
| GO:0016811 | hydrolase activity, acting on ca | MF | 6  | 1  | 562 | 14   | 19809 | 3.32E-01 |
| GO:0071305 | cellular response to vitamin D   | BP | 8  | 1  | 562 | 14   | 19809 | 3.32E-01 |
| GO:0031669 | cellular response to nutrient le | BP | 7  | 1  | 562 | 14   | 19809 | 3.32E-01 |
| GO:1990380 | Lys48-specific deubiquitinase    | MF | 6  | 1  | 562 | 14   | 19809 | 3.32E-01 |
| GO:0045651 | positive regulation of macroph   | BP | 10 | 1  | 562 | 14   | 19809 | 3.32E-01 |
| GO:0004029 | aldehyde dehydrogenase (NAI      | MF | 7  | 1  | 562 | 14   | 19809 | 3.32E-01 |
| GO:0038024 | cargo receptor activity          | MF | 3  | 1  | 562 | 14   | 19809 | 3.32E-01 |
| GO:0032693 | negative regulation of interleul | BP | 8  | 1  | 562 | 14   | 19809 | 3.32E-01 |
| GO:0048172 | regulation of short-term neuroi  | BP | 11 | 1  | 562 | 14   | 19809 | 3.32E-01 |
| GO:0050892 | intestinal absorption            | BP | 6  | 1  | 562 | 14   | 19809 | 3.32E-01 |
| GO:0019725 | cellular homeostasis             | BP | 4  | 1  | 562 | 14   | 19809 | 3.32E-01 |
| GO:0015693 | magnesium ion transport          | BP | 10 | 1  | 562 | 14   | 19809 | 3.32E-01 |
| GO:0032743 | positive regulation of interleuk | BP | 8  | 1  | 562 | 14   | 19809 | 3.32E-01 |
| GO:1903428 | positive regulation of reactive  | BP | 8  | 1  | 562 | 14   | 19809 | 3.32E-01 |
| GO:0015278 | calcium-release channel activit  | MF | 9  | 1  | 562 | 14   | 19809 | 3.32E-01 |
| GO:0016471 | vacuolar proton-transporting V   | CC | 7  | 1  | 562 | 14   | 19809 | 3.32E-01 |
| GO:1900747 | negative regulation of vascular  | BP | 9  | 1  | 562 | 14   | 19809 | 3.32E-01 |
| GO:0071805 | potassium ion transmembrane      | BP | 10 | 5  | 562 | 134  | 19809 | 3.32E-01 |
| GO:0002244 | hematopoietic progenitor cell c  | BP | 6  | 3  | 562 | 72   | 19809 | 3.35E-01 |
| GO:0051017 | actin filament bundle assembly   | BP | 6  | 2  | 562 | 42   | 19809 | 3.35E-01 |
| GO:0001102 | RNA polymerase II activating     | MF | 8  | 2  | 562 | 42   | 19809 | 3.35E-01 |
| GO:0090501 | RNA phosphodiester bond hyc      | BP | 9  | 2  | 562 | 42   | 19809 | 3.35E-01 |
| GO:0051225 | spindle assembly                 | BP | 9  | 2  | 562 | 42   | 19809 | 3.35E-01 |
| GO:0010811 | positive regulation of cell-sub  | BP | 7  | 2  | 562 | 42   | 19809 | 3.35E-01 |
| GO:0019882 | antigen processing and present   | BP | 4  | 2  | 562 | 42   | 19809 | 3.35E-01 |
| GO:0005160 | transforming growth factor bet   | MF | 7  | 2  | 562 | 42   | 19809 | 3.35E-01 |
| GO:0098655 | cation transmembrane transpor    | BP | 8  | 2  | 562 | 42   | 19809 | 3.35E-01 |
| GO:0007156 | homophilic cell adhesion via p   | BP | 7  | 6  | 562 | 167  | 19809 | 3.37E-01 |
| GO:0006355 | regulation of transcription, DN  | BP | 8  | 47 | 562 | 1551 | 19809 | 3.39E-01 |
| GO:0005516 | calmodulin binding               | MF | 5  | 7  | 562 | 200  | 19809 | 3.40E-01 |
| GO:0032091 | negative regulation of protein l | BP | 7  | 3  | 562 | 73   | 19809 | 3.43E-01 |
| GO:0050767 | regulation of neurogenesis       | BP | 8  | 2  | 562 | 43   | 19809 | 3.46E-01 |
| GO:0006352 | DNA-templated transcription,     | BP | 8  | 2  | 562 | 43   | 19809 | 3.46E-01 |
| GO:0007368 | determination of left/right sym  | BP | 7  | 3  | 562 | 74   | 19809 | 3.51E-01 |
| GO:0043433 | negative regulation of DNA-bi    | BP | 6  | 3  | 562 | 74   | 19809 | 3.51E-01 |
| GO:0006878 | cellular copper ion homeostasi   | BP | 12 | 1  | 562 | 15   | 19809 | 3.51E-01 |
| GO:0016540 | protein autoprocessing           | BP | 9  | 1  | 562 | 15   | 19809 | 3.51E-01 |
| GO:0034587 | piRNA metabolic process          | BP | 10 | 1  | 562 | 15   | 19809 | 3.51E-01 |
| GO:1903830 | magnesium ion transmembran       | BP | 11 | 1  | 562 | 15   | 19809 | 3.51E-01 |
| GO:0035909 | aorta morphogenesis              | BP | 8  | 1  | 562 | 15   | 19809 | 3.51E-01 |
| GO:0042554 | superoxide anion generation      | BP | 7  | 1  | 562 | 15   | 19809 | 3.51E-01 |
| GO:0005639 | integral component of nuclear    | CC | 7  | 1  | 562 | 15   | 19809 | 3.51E-01 |
| GO:0033689 | negative regulation of osteobla  | BP | 8  | 1  | 562 | 15   | 19809 | 3.51E-01 |
| GO:0051016 | barbed-end actin filament cap    | BP | 11 | 1  | 562 | 15   | 19809 | 3.51E-01 |
| GO:0032703 | negative regulation of interleul | BP | 8  | 1  | 562 | 15   | 19809 | 3.51E-01 |

|            |                                                               |    |    |   |     |     |       |          |
|------------|---------------------------------------------------------------|----|----|---|-----|-----|-------|----------|
| GO:0099059 | integral component of presynaptic membrane                    | CC | 7  | 1 | 562 | 15  | 19809 | 3.51E-01 |
| GO:0031462 | Cul2-RING ubiquitin ligase complex                            | CC | 7  | 1 | 562 | 15  | 19809 | 3.51E-01 |
| GO:0045667 | regulation of osteoblast differentiation                      | BP | 7  | 1 | 562 | 15  | 19809 | 3.51E-01 |
| GO:1900181 | negative regulation of protein localization                   | BP | 9  | 1 | 562 | 15  | 19809 | 3.51E-01 |
| GO:0016584 | nucleosome positioning                                        | BP | 8  | 1 | 562 | 15  | 19809 | 3.51E-01 |
| GO:0045178 | basal part of cell                                            | CC | 4  | 1 | 562 | 15  | 19809 | 3.51E-01 |
| GO:0030195 | negative regulation of blood coagulation                      | BP | 8  | 1 | 562 | 15  | 19809 | 3.51E-01 |
| GO:0060047 | heart contraction                                             | BP | 7  | 1 | 562 | 15  | 19809 | 3.51E-01 |
| GO:0045580 | regulation of T cell differentiation                          | BP | 9  | 1 | 562 | 15  | 19809 | 3.51E-01 |
| GO:0006518 | peptide metabolic process                                     | BP | 7  | 1 | 562 | 15  | 19809 | 3.51E-01 |
| GO:0031045 | dense core granule                                            | CC | 9  | 1 | 562 | 15  | 19809 | 3.51E-01 |
| GO:2000737 | negative regulation of stem cell proliferation                | BP | 8  | 1 | 562 | 15  | 19809 | 3.51E-01 |
| GO:0090303 | positive regulation of wound healing                          | BP | 9  | 1 | 562 | 15  | 19809 | 3.51E-01 |
| GO:0005161 | platelet-derived growth factor receptor signaling pathway     | MF | 7  | 1 | 562 | 15  | 19809 | 3.51E-01 |
| GO:0043508 | negative regulation of JUN kinase activity                    | BP | 13 | 1 | 562 | 15  | 19809 | 3.51E-01 |
| GO:0042622 | photoreceptor outer segment morphogenesis                     | CC | 7  | 1 | 562 | 15  | 19809 | 3.51E-01 |
| GO:0035326 | enhancer binding                                              | MF | 8  | 1 | 562 | 15  | 19809 | 3.51E-01 |
| GO:0006112 | energy reserve metabolic process                              | BP | 7  | 1 | 562 | 15  | 19809 | 3.51E-01 |
| GO:0032516 | positive regulation of phospholipase activity                 | BP | 12 | 1 | 562 | 15  | 19809 | 3.51E-01 |
| GO:1903206 | negative regulation of hydrogen ion transport                 | BP | 10 | 1 | 562 | 15  | 19809 | 3.51E-01 |
| GO:0032794 | GTPase activating protein binding                             | MF | 5  | 1 | 562 | 15  | 19809 | 3.51E-01 |
| GO:1901381 | positive regulation of potassium ion transport                | BP | 11 | 1 | 562 | 15  | 19809 | 3.51E-01 |
| GO:0050910 | detection of mechanical stimulus                              | BP | 6  | 1 | 562 | 15  | 19809 | 3.51E-01 |
| GO:0007158 | neuron cell-cell adhesion                                     | BP | 6  | 1 | 562 | 15  | 19809 | 3.51E-01 |
| GO:0015908 | fatty acid transport                                          | BP | 8  | 1 | 562 | 15  | 19809 | 3.51E-01 |
| GO:0006750 | glutathione biosynthetic process                              | BP | 9  | 1 | 562 | 15  | 19809 | 3.51E-01 |
| GO:0001510 | RNA methylation                                               | BP | 10 | 1 | 562 | 15  | 19809 | 3.51E-01 |
| GO:0008527 | taste receptor activity                                       | MF | 6  | 1 | 562 | 15  | 19809 | 3.51E-01 |
| GO:2000484 | positive regulation of interleukin-1 production               | BP | 9  | 1 | 562 | 15  | 19809 | 3.51E-01 |
| GO:0097623 | potassium ion export across plasma membrane                   | BP | 11 | 1 | 562 | 15  | 19809 | 3.51E-01 |
| GO:0060996 | dendritic spine development                                   | BP | 5  | 1 | 562 | 15  | 19809 | 3.51E-01 |
| GO:0046935 | 1-phosphatidylinositol-3-kinase activity                      | MF | 7  | 1 | 562 | 15  | 19809 | 3.51E-01 |
| GO:0010820 | positive regulation of T cell chemotaxis                      | BP | 10 | 1 | 562 | 15  | 19809 | 3.51E-01 |
| GO:0098993 | anchored component of synapse                                 | CC | 6  | 1 | 562 | 15  | 19809 | 3.51E-01 |
| GO:0043951 | negative regulation of cAMP-activated protein kinase activity | BP | 10 | 1 | 562 | 15  | 19809 | 3.51E-01 |
| GO:0035259 | glucocorticoid receptor binding                               | MF | 9  | 1 | 562 | 15  | 19809 | 3.51E-01 |
| GO:0005088 | Ras guanyl-nucleotide exchange factor activity                | MF | 8  | 1 | 562 | 15  | 19809 | 3.51E-01 |
| GO:0045670 | regulation of osteoclast differentiation                      | BP | 9  | 1 | 562 | 15  | 19809 | 3.51E-01 |
| GO:0043083 | synaptic cleft                                                | CC | 4  | 1 | 562 | 15  | 19809 | 3.51E-01 |
| GO:0003841 | 1-acylglycerol-3-phosphate O-acylation                        | MF | 9  | 1 | 562 | 15  | 19809 | 3.51E-01 |
| GO:0006914 | autophagy                                                     | BP | 6  | 6 | 562 | 170 | 19809 | 3.52E-01 |
| GO:0007417 | central nervous system development                            | BP | 6  | 5 | 562 | 138 | 19809 | 3.54E-01 |
| GO:0002224 | toll-like receptor signaling pathway                          | BP | 8  | 2 | 562 | 44  | 19809 | 3.56E-01 |
| GO:0070527 | platelet aggregation                                          | BP | 7  | 2 | 562 | 44  | 19809 | 3.56E-01 |
| GO:0030282 | bone mineralization                                           | BP | 7  | 2 | 562 | 44  | 19809 | 3.56E-01 |
| GO:0008307 | structural constituent of muscle fiber                        | MF | 4  | 2 | 562 | 44  | 19809 | 3.56E-01 |
| GO:0008652 | cellular amino acid biosynthesis                              | BP | 9  | 2 | 562 | 44  | 19809 | 3.56E-01 |
| GO:0004857 | enzyme inhibitor activity                                     | MF | 5  | 2 | 562 | 44  | 19809 | 3.56E-01 |
| GO:0021762 | substantia nigra development                                  | BP | 6  | 2 | 562 | 44  | 19809 | 3.56E-01 |
| GO:0007266 | Rho protein signal transduction                               | BP | 8  | 3 | 562 | 75  | 19809 | 3.58E-01 |

|            |                                   |    |    |    |     |      |       |          |
|------------|-----------------------------------|----|----|----|-----|------|-------|----------|
| GO:0016757 | transferase activity, transferrin | MF | 5  | 8  | 562 | 237  | 19809 | 3.59E-01 |
| GO:0016787 | hydrolase activity                | MF | 4  | 50 | 562 | 1667 | 19809 | 3.60E-01 |
| GO:0030016 | myofibril                         | CC | 7  | 2  | 562 | 45   | 19809 | 3.66E-01 |
| GO:0042562 | hormone binding                   | MF | 4  | 1  | 562 | 16   | 19809 | 3.69E-01 |
| GO:0005005 | transmembrane-ephrin recepto      | MF | 11 | 1  | 562 | 16   | 19809 | 3.69E-01 |
| GO:0015671 | oxygen transport                  | BP | 7  | 1  | 562 | 16   | 19809 | 3.69E-01 |
| GO:0010633 | negative regulation of epitheli   | BP | 9  | 1  | 562 | 16   | 19809 | 3.69E-01 |
| GO:0008328 | ionotropic glutamate receptor     | CC | 7  | 1  | 562 | 16   | 19809 | 3.69E-01 |
| GO:0001516 | prostaglandin biosynthetic pro    | BP | 11 | 1  | 562 | 16   | 19809 | 3.69E-01 |
| GO:0014067 | negative regulation of phospho    | BP | 10 | 1  | 562 | 16   | 19809 | 3.69E-01 |
| GO:0097746 | regulation of blood vessel dian   | BP | 8  | 1  | 562 | 16   | 19809 | 3.69E-01 |
| GO:2001224 | positive regulation of neuron n   | BP | 9  | 1  | 562 | 16   | 19809 | 3.69E-01 |
| GO:0035162 | embryonic hemopoiesis             | BP | 8  | 1  | 562 | 16   | 19809 | 3.69E-01 |
| GO:0042974 | retinoic acid receptor binding    | MF | 8  | 1  | 562 | 16   | 19809 | 3.69E-01 |
| GO:0042613 | MHC class II protein complex      | CC | 7  | 1  | 562 | 16   | 19809 | 3.69E-01 |
| GO:0001736 | establishment of planar polarit   | BP | 6  | 1  | 562 | 16   | 19809 | 3.69E-01 |
| GO:0050868 | negative regulation of T cell ac  | BP | 9  | 1  | 562 | 16   | 19809 | 3.69E-01 |
| GO:0004708 | MAP kinase kinase activity        | MF | 9  | 1  | 562 | 16   | 19809 | 3.69E-01 |
| GO:0008066 | glutamate receptor activity       | MF | 6  | 1  | 562 | 16   | 19809 | 3.69E-01 |
| GO:2000406 | positive regulation of T cell m   | BP | 9  | 1  | 562 | 16   | 19809 | 3.69E-01 |
| GO:0061053 | somite development                | BP | 7  | 1  | 562 | 16   | 19809 | 3.69E-01 |
| GO:0048384 | retinoic acid receptor signaling  | BP | 6  | 1  | 562 | 16   | 19809 | 3.69E-01 |
| GO:0003756 | protein disulfide isomerase act   | MF | 7  | 1  | 562 | 16   | 19809 | 3.69E-01 |
| GO:0045616 | regulation of keratinocyte diff   | BP | 9  | 1  | 562 | 16   | 19809 | 3.69E-01 |
| GO:0006790 | sulfur compound metabolic pr      | BP | 5  | 1  | 562 | 16   | 19809 | 3.69E-01 |
| GO:0032959 | inositol trisphosphate biosynth   | BP | 9  | 1  | 562 | 16   | 19809 | 3.69E-01 |
| GO:0000400 | four-way junction DNA bindir      | MF | 8  | 1  | 562 | 16   | 19809 | 3.69E-01 |
| GO:0015095 | magnesium ion transmembran        | MF | 9  | 1  | 562 | 16   | 19809 | 3.69E-01 |
| GO:0035970 | peptidyl-threonine dephosphor     | BP | 10 | 1  | 562 | 16   | 19809 | 3.69E-01 |
| GO:0000028 | ribosomal small subunit assem     | BP | 9  | 1  | 562 | 16   | 19809 | 3.69E-01 |
| GO:0035640 | exploration behavior              | BP | 4  | 1  | 562 | 16   | 19809 | 3.69E-01 |
| GO:0019372 | lipoxygenase pathway              | BP | 10 | 1  | 562 | 16   | 19809 | 3.69E-01 |
| GO:0071391 | cellular response to estrogen st  | BP | 5  | 1  | 562 | 16   | 19809 | 3.69E-01 |
| GO:0035196 | production of miRNAs involve      | BP | 12 | 1  | 562 | 16   | 19809 | 3.69E-01 |
| GO:0086010 | membrane depolarization durin     | BP | 7  | 1  | 562 | 16   | 19809 | 3.69E-01 |
| GO:0006895 | Golgi to endosome transport       | BP | 9  | 1  | 562 | 16   | 19809 | 3.69E-01 |
| GO:0015813 | L-glutamate transmembrane tr      | BP | 11 | 1  | 562 | 16   | 19809 | 3.69E-01 |
| GO:0097320 | plasma membrane tubulation        | BP | 7  | 1  | 562 | 16   | 19809 | 3.69E-01 |
| GO:0032963 | collagen metabolic process        | BP | 4  | 1  | 562 | 16   | 19809 | 3.69E-01 |
| GO:0008656 | cysteine-type endopeptidase ac    | MF | 8  | 1  | 562 | 16   | 19809 | 3.69E-01 |
| GO:0043395 | heparan sulfate proteoglycan b    | MF | 6  | 1  | 562 | 16   | 19809 | 3.69E-01 |
| GO:0006941 | striated muscle contraction       | BP | 7  | 1  | 562 | 16   | 19809 | 3.69E-01 |
| GO:0003382 | epithelial cell morphogenesis     | BP | 8  | 1  | 562 | 16   | 19809 | 3.69E-01 |
| GO:0050921 | positive regulation of chemota    | BP | 8  | 1  | 562 | 16   | 19809 | 3.69E-01 |
| GO:2001222 | regulation of neuron migration    | BP | 8  | 1  | 562 | 16   | 19809 | 3.69E-01 |
| GO:0005662 | DNA replication factor A com      | CC | 4  | 1  | 562 | 16   | 19809 | 3.69E-01 |
| GO:0061158 | 3'-UTR-mediated mRNA desta        | BP | 12 | 1  | 562 | 16   | 19809 | 3.69E-01 |
| GO:0003222 | ventricular trabecula myocardi    | BP | 9  | 1  | 562 | 16   | 19809 | 3.69E-01 |
| GO:0071850 | mitotic cell cycle arrest         | BP | 6  | 1  | 562 | 16   | 19809 | 3.69E-01 |
| GO:0060216 | definitive hemopoiesis            | BP | 8  | 1  | 562 | 16   | 19809 | 3.69E-01 |

|            |                                   |    |    |    |     |     |       |          |
|------------|-----------------------------------|----|----|----|-----|-----|-------|----------|
| GO:0030021 | extracellular matrix structural   | MF | 5  | 1  | 562 | 16  | 19809 | 3.69E-01 |
| GO:0090280 | positive regulation of calcium    | BP | 10 | 1  | 562 | 16  | 19809 | 3.69E-01 |
| GO:0001935 | endothelial cell proliferation    | BP | 5  | 1  | 562 | 16  | 19809 | 3.69E-01 |
| GO:0034975 | protein folding in endoplasmic    | BP | 5  | 1  | 562 | 16  | 19809 | 3.69E-01 |
| GO:0070593 | dendrite self-avoidance           | BP | 6  | 1  | 562 | 16  | 19809 | 3.69E-01 |
| GO:0045589 | regulation of regulatory T cell   | BP | 10 | 1  | 562 | 16  | 19809 | 3.69E-01 |
| GO:0045190 | isotype switching                 | BP | 8  | 1  | 562 | 16  | 19809 | 3.69E-01 |
| GO:0035102 | PRC1 complex                      | CC | 7  | 1  | 562 | 16  | 19809 | 3.69E-01 |
| GO:0045202 | synapse                           | CC | 3  | 19 | 562 | 610 | 19809 | 3.71E-01 |
| GO:0042383 | sarcolemma                        | CC | 5  | 4  | 562 | 109 | 19809 | 3.74E-01 |
| GO:0016363 | nuclear matrix                    | CC | 6  | 4  | 562 | 109 | 19809 | 3.74E-01 |
| GO:0008584 | male gonad development            | BP | 7  | 4  | 562 | 109 | 19809 | 3.74E-01 |
| GO:0052689 | carboxylic ester hydrolase acti   | MF | 6  | 2  | 562 | 46  | 19809 | 3.77E-01 |
| GO:0007595 | lactation                         | BP | 8  | 2  | 562 | 46  | 19809 | 3.77E-01 |
| GO:0010508 | positive regulation of autophag   | BP | 9  | 2  | 562 | 46  | 19809 | 3.77E-01 |
| GO:0050766 | positive regulation of phagocy    | BP | 8  | 2  | 562 | 46  | 19809 | 3.77E-01 |
| GO:0032993 | protein-DNA complex               | CC | 4  | 2  | 562 | 46  | 19809 | 3.77E-01 |
| GO:0030968 | endoplasmic reticulum unfold      | BP | 5  | 2  | 562 | 46  | 19809 | 3.77E-01 |
| GO:0016311 | dephosphorylation                 | BP | 7  | 6  | 562 | 175 | 19809 | 3.78E-01 |
| GO:0000786 | nucleosome                        | CC | 5  | 4  | 562 | 110 | 19809 | 3.80E-01 |
| GO:0006334 | nucleosome assembly               | BP | 7  | 4  | 562 | 110 | 19809 | 3.80E-01 |
| GO:0005793 | endoplasmic reticulum-Golgi i     | CC | 6  | 3  | 562 | 78  | 19809 | 3.82E-01 |
| GO:0016197 | endosomal transport               | BP | 7  | 3  | 562 | 78  | 19809 | 3.82E-01 |
| GO:0031594 | neuromuscular junction            | CC | 4  | 3  | 562 | 78  | 19809 | 3.82E-01 |
| GO:0045454 | cell redox homeostasis            | BP | 5  | 3  | 562 | 78  | 19809 | 3.82E-01 |
| GO:0031965 | nuclear membrane                  | CC | 5  | 8  | 562 | 243 | 19809 | 3.85E-01 |
| GO:0043647 | inositol phosphate metabolic p    | BP | 7  | 2  | 562 | 47  | 19809 | 3.87E-01 |
| GO:0030155 | regulation of cell adhesion       | BP | 5  | 2  | 562 | 47  | 19809 | 3.87E-01 |
| GO:0014704 | intercalated disc                 | CC | 6  | 2  | 562 | 47  | 19809 | 3.87E-01 |
| GO:0035914 | skeletal muscle cell differentia  | BP | 6  | 2  | 562 | 47  | 19809 | 3.87E-01 |
| GO:0032270 | positive regulation of cellular j | BP | 8  | 1  | 562 | 17  | 19809 | 3.87E-01 |
| GO:0060285 | cilium-dependent cell motility    | BP | 7  | 1  | 562 | 17  | 19809 | 3.87E-01 |
| GO:0030247 | polysaccharide binding            | MF | 5  | 1  | 562 | 17  | 19809 | 3.87E-01 |
| GO:0042813 | Wnt-activated receptor activity   | MF | 6  | 1  | 562 | 17  | 19809 | 3.87E-01 |
| GO:0006883 | cellular sodium ion homeostas     | BP | 11 | 1  | 562 | 17  | 19809 | 3.87E-01 |
| GO:0043292 | contractile fiber                 | CC | 6  | 1  | 562 | 17  | 19809 | 3.87E-01 |
| GO:0051131 | chaperone-mediated protein cc     | BP | 8  | 1  | 562 | 17  | 19809 | 3.87E-01 |
| GO:0031143 | pseudopodium                      | CC | 6  | 1  | 562 | 17  | 19809 | 3.87E-01 |
| GO:0008324 | cation transmembrane transpor     | MF | 6  | 1  | 562 | 17  | 19809 | 3.87E-01 |
| GO:1904355 | positive regulation of telomere   | BP | 11 | 1  | 562 | 17  | 19809 | 3.87E-01 |
| GO:0002407 | dendritic cell chemotaxis         | BP | 6  | 1  | 562 | 17  | 19809 | 3.87E-01 |
| GO:0034122 | negative regulation of toll-like  | BP | 7  | 1  | 562 | 17  | 19809 | 3.87E-01 |
| GO:0046849 | bone remodeling                   | BP | 5  | 1  | 562 | 17  | 19809 | 3.87E-01 |
| GO:0070063 | RNA polymerase binding            | MF | 6  | 1  | 562 | 17  | 19809 | 3.87E-01 |
| GO:0031904 | endosome lumen                    | CC | 8  | 1  | 562 | 17  | 19809 | 3.87E-01 |
| GO:0060324 | face development                  | BP | 5  | 1  | 562 | 17  | 19809 | 3.87E-01 |
| GO:0042834 | peptidoglycan binding             | MF | 6  | 1  | 562 | 17  | 19809 | 3.87E-01 |
| GO:0098688 | parallel fiber to Purkinje cell s | CC | 5  | 1  | 562 | 17  | 19809 | 3.87E-01 |
| GO:0043024 | ribosomal small subunit bindir    | MF | 6  | 1  | 562 | 17  | 19809 | 3.87E-01 |
| GO:0047555 | 3',5'-cyclic-GMP phosphodi        | MF | 10 | 1  | 562 | 17  | 19809 | 3.87E-01 |

|            |                                  |    |    |    |     |     |       |          |
|------------|----------------------------------|----|----|----|-----|-----|-------|----------|
| GO:0035036 | sperm-egg recognition            | BP | 6  | 1  | 562 | 17  | 19809 | 3.87E-01 |
| GO:0032966 | negative regulation of collagen  | BP | 8  | 1  | 562 | 17  | 19809 | 3.87E-01 |
| GO:0033198 | response to ATP                  | BP | 8  | 1  | 562 | 17  | 19809 | 3.87E-01 |
| GO:0055075 | potassium ion homeostasis        | BP | 10 | 1  | 562 | 17  | 19809 | 3.87E-01 |
| GO:0048535 | lymph node development           | BP | 7  | 1  | 562 | 17  | 19809 | 3.87E-01 |
| GO:0045717 | negative regulation of fatty aci | BP | 9  | 1  | 562 | 17  | 19809 | 3.87E-01 |
| GO:0004198 | calcium-dependent cysteine-ty    | MF | 9  | 1  | 562 | 17  | 19809 | 3.87E-01 |
| GO:0010586 | miRNA metabolic process          | BP | 10 | 1  | 562 | 17  | 19809 | 3.87E-01 |
| GO:0042310 | vasoconstriction                 | BP | 10 | 1  | 562 | 17  | 19809 | 3.87E-01 |
| GO:0034375 | high-density lipoprotein partic  | BP | 9  | 1  | 562 | 17  | 19809 | 3.87E-01 |
| GO:1901653 | cellular response to peptide     | BP | 8  | 1  | 562 | 17  | 19809 | 3.87E-01 |
| GO:0031489 | myosin V binding                 | MF | 7  | 1  | 562 | 17  | 19809 | 3.87E-01 |
| GO:0050850 | positive regulation of calcium-  | BP | 10 | 1  | 562 | 17  | 19809 | 3.87E-01 |
| GO:0030837 | negative regulation of actin fil | BP | 9  | 1  | 562 | 17  | 19809 | 3.87E-01 |
| GO:0060441 | epithelial tube branching invol  | BP | 7  | 1  | 562 | 17  | 19809 | 3.87E-01 |
| GO:0070886 | positive regulation of calcineu  | BP | 12 | 1  | 562 | 17  | 19809 | 3.87E-01 |
| GO:0007009 | plasma membrane organizatio      | BP | 6  | 1  | 562 | 17  | 19809 | 3.87E-01 |
| GO:0051216 | cartilage development            | BP | 6  | 3  | 562 | 79  | 19809 | 3.89E-01 |
| GO:0001933 | negative regulation of protein j | BP | 10 | 3  | 562 | 79  | 19809 | 3.89E-01 |
| GO:0040008 | regulation of growth             | BP | 5  | 3  | 562 | 79  | 19809 | 3.89E-01 |
| GO:0006813 | potassium ion transport          | BP | 9  | 5  | 562 | 145 | 19809 | 3.94E-01 |
| GO:0060291 | long-term synaptic potentiation  | BP | 10 | 2  | 562 | 48  | 19809 | 3.97E-01 |
| GO:0000186 | activation of MAPKK activity     | BP | 13 | 2  | 562 | 48  | 19809 | 3.97E-01 |
| GO:0006520 | cellular amino acid metabolic j  | BP | 8  | 2  | 562 | 48  | 19809 | 3.97E-01 |
| GO:0007157 | heterophilic cell-cell adhesion  | BP | 7  | 2  | 562 | 48  | 19809 | 3.97E-01 |
| GO:0048015 | phosphatidylinositol-mediated    | BP | 7  | 2  | 562 | 48  | 19809 | 3.97E-01 |
| GO:0050808 | synapse organization             | BP | 5  | 2  | 562 | 48  | 19809 | 3.97E-01 |
| GO:0051117 | ATPase binding                   | MF | 6  | 3  | 562 | 80  | 19809 | 3.97E-01 |
| GO:0043123 | positive regulation of I-kappaE  | BP | 10 | 6  | 562 | 179 | 19809 | 3.98E-01 |
| GO:0008289 | lipid binding                    | MF | 4  | 10 | 562 | 314 | 19809 | 4.00E-01 |
| GO:0045211 | postsynaptic membrane            | CC | 5  | 8  | 562 | 247 | 19809 | 4.02E-01 |
| GO:0005525 | GTP binding                      | MF | 8  | 12 | 562 | 383 | 19809 | 4.04E-01 |
| GO:0019432 | triglyceride biosynthetic proce  | BP | 10 | 1  | 562 | 18  | 19809 | 4.04E-01 |
| GO:0001709 | cell fate determination          | BP | 5  | 1  | 562 | 18  | 19809 | 4.04E-01 |
| GO:0001702 | gastrulation with mouth formir   | BP | 7  | 1  | 562 | 18  | 19809 | 4.04E-01 |
| GO:0000712 | resolution of meiotic recombin   | BP | 7  | 1  | 562 | 18  | 19809 | 4.04E-01 |
| GO:0043011 | myeloid dendritic cell differen  | BP | 8  | 1  | 562 | 18  | 19809 | 4.04E-01 |
| GO:0048566 | embryonic digestive tract deve   | BP | 7  | 1  | 562 | 18  | 19809 | 4.04E-01 |
| GO:0090026 | positive regulation of monocy    | BP | 9  | 1  | 562 | 18  | 19809 | 4.04E-01 |
| GO:0046847 | filopodium assembly              | BP | 8  | 1  | 562 | 18  | 19809 | 4.04E-01 |
| GO:0048646 | anatomical structure formation   | BP | 4  | 1  | 562 | 18  | 19809 | 4.04E-01 |
| GO:1901379 | regulation of potassium ion tra  | BP | 10 | 1  | 562 | 18  | 19809 | 4.04E-01 |
| GO:0007095 | mitotic G2 DNA damage checl      | BP | 9  | 1  | 562 | 18  | 19809 | 4.04E-01 |
| GO:0042288 | MHC class I protein binding      | MF | 7  | 1  | 562 | 18  | 19809 | 4.04E-01 |
| GO:0009190 | cyclic nucleotide biosynthetic   | BP | 10 | 1  | 562 | 18  | 19809 | 4.04E-01 |
| GO:0032433 | filopodium tip                   | CC | 6  | 1  | 562 | 18  | 19809 | 4.04E-01 |
| GO:0097602 | cullin family protein binding    | MF | 5  | 1  | 562 | 18  | 19809 | 4.04E-01 |
| GO:0004970 | ionotropic glutamate receptor :  | MF | 7  | 1  | 562 | 18  | 19809 | 4.04E-01 |
| GO:0032331 | negative regulation of chondro   | BP | 8  | 1  | 562 | 18  | 19809 | 4.04E-01 |
| GO:0008301 | DNA binding, bending             | MF | 7  | 1  | 562 | 18  | 19809 | 4.04E-01 |

|            |                                  |    |    |    |     |     |       |          |
|------------|----------------------------------|----|----|----|-----|-----|-------|----------|
| GO:0022011 | myelination in peripheral nerv   | BP | 7  | 1  | 562 | 18  | 19809 | 4.04E-01 |
| GO:0099524 | postsynaptic cytosol             | CC | 4  | 1  | 562 | 18  | 19809 | 4.04E-01 |
| GO:0010666 | positive regulation of cardiac r | BP | 12 | 1  | 562 | 18  | 19809 | 4.04E-01 |
| GO:0051895 | negative regulation of focal ad  | BP | 9  | 1  | 562 | 18  | 19809 | 4.04E-01 |
| GO:0008569 | ATP-dependent microtubule r      | MF | 12 | 1  | 562 | 18  | 19809 | 4.04E-01 |
| GO:0070064 | proline-rich region binding      | MF | 5  | 1  | 562 | 18  | 19809 | 4.04E-01 |
| GO:0007250 | activation of NF-kappaB-induc    | BP | 13 | 1  | 562 | 18  | 19809 | 4.04E-01 |
| GO:2000042 | negative regulation of double-s  | BP | 11 | 1  | 562 | 18  | 19809 | 4.04E-01 |
| GO:2000251 | positive regulation of actin cyt | BP | 10 | 1  | 562 | 18  | 19809 | 4.04E-01 |
| GO:0080111 | DNA demethylation                | BP | 10 | 1  | 562 | 18  | 19809 | 4.04E-01 |
| GO:0001964 | startle response                 | BP | 5  | 1  | 562 | 18  | 19809 | 4.04E-01 |
| GO:0000038 | very long-chain fatty acid met   | BP | 10 | 1  | 562 | 18  | 19809 | 4.04E-01 |
| GO:0060037 | pharyngeal system developme      | BP | 6  | 1  | 562 | 18  | 19809 | 4.04E-01 |
| GO:0019752 | carboxylic acid metabolic proc   | BP | 7  | 1  | 562 | 18  | 19809 | 4.04E-01 |
| GO:0032426 | stereocilium tip                 | CC | 4  | 1  | 562 | 18  | 19809 | 4.04E-01 |
| GO:0007221 | positive regulation of transcrip | BP | 11 | 1  | 562 | 18  | 19809 | 4.04E-01 |
| GO:0050880 | regulation of blood vessel size  | BP | 7  | 1  | 562 | 18  | 19809 | 4.04E-01 |
| GO:0008320 | protein transmembrane transpc    | MF | 6  | 1  | 562 | 18  | 19809 | 4.04E-01 |
| GO:0003429 | growth plate cartilage chondro   | BP | 10 | 1  | 562 | 18  | 19809 | 4.04E-01 |
| GO:0043551 | regulation of phosphatidylinos   | BP | 9  | 1  | 562 | 18  | 19809 | 4.04E-01 |
| GO:0007194 | negative regulation of adenylat  | BP | 8  | 1  | 562 | 18  | 19809 | 4.04E-01 |
| GO:0086005 | ventricular cardiac muscle cell  | BP | 9  | 1  | 562 | 18  | 19809 | 4.04E-01 |
| GO:0034199 | activation of protein kinase A : | BP | 13 | 1  | 562 | 18  | 19809 | 4.04E-01 |
| GO:1990126 | retrograde transport, endosome   | BP | 8  | 1  | 562 | 18  | 19809 | 4.04E-01 |
| GO:0035269 | protein O-linked mannosylatio    | BP | 11 | 1  | 562 | 18  | 19809 | 4.04E-01 |
| GO:0005798 | Golgi-associated vesicle         | CC | 7  | 1  | 562 | 18  | 19809 | 4.04E-01 |
| GO:0061178 | regulation of insulin secretion  | BP | 6  | 1  | 562 | 18  | 19809 | 4.04E-01 |
| GO:0038191 | neuropilin binding               | MF | 6  | 1  | 562 | 18  | 19809 | 4.04E-01 |
| GO:0006936 | muscle contraction               | BP | 6  | 4  | 562 | 114 | 19809 | 4.06E-01 |
| GO:0005179 | hormone activity                 | MF | 7  | 4  | 562 | 114 | 19809 | 4.06E-01 |
| GO:0034260 | negative regulation of GTPase    | BP | 8  | 2  | 562 | 49  | 19809 | 4.07E-01 |
| GO:1990841 | promoter-specific chromatin b    | MF | 5  | 2  | 562 | 49  | 19809 | 4.07E-01 |
| GO:0023014 | signal transduction by protein   | BP | 10 | 2  | 562 | 49  | 19809 | 4.07E-01 |
| GO:0016491 | oxidoreductase activity          | MF | 4  | 18 | 562 | 589 | 19809 | 4.07E-01 |
| GO:0060271 | cilium assembly                  | BP | 7  | 6  | 562 | 181 | 19809 | 4.08E-01 |
| GO:0001764 | neuron migration                 | BP | 7  | 4  | 562 | 115 | 19809 | 4.12E-01 |
| GO:0009887 | animal organ morphogenesis       | BP | 5  | 4  | 562 | 115 | 19809 | 4.12E-01 |
| GO:0046983 | protein dimerization activity    | MF | 5  | 7  | 562 | 216 | 19809 | 4.15E-01 |
| GO:0030514 | negative regulation of BMP sig   | BP | 11 | 2  | 562 | 50  | 19809 | 4.17E-01 |
| GO:0007173 | epidermal growth factor recept   | BP | 9  | 2  | 562 | 50  | 19809 | 4.17E-01 |
| GO:0016301 | kinase activity                  | MF | 6  | 21 | 562 | 696 | 19809 | 4.18E-01 |
| GO:0000724 | double-strand break repair via   | BP | 10 | 3  | 562 | 83  | 19809 | 4.20E-01 |
| GO:0045088 | regulation of innate immune re   | BP | 7  | 1  | 562 | 19  | 19809 | 4.21E-01 |
| GO:0001223 | transcription coactivator bindi  | MF | 7  | 1  | 562 | 19  | 19809 | 4.21E-01 |
| GO:2000649 | regulation of sodium ion trans   | BP | 8  | 1  | 562 | 19  | 19809 | 4.21E-01 |
| GO:0010614 | negative regulation of cardiac   | BP | 10 | 1  | 562 | 19  | 19809 | 4.21E-01 |
| GO:2000774 | positive regulation of cellular  | BP | 7  | 1  | 562 | 19  | 19809 | 4.21E-01 |
| GO:0098641 | cadherin binding involved in c   | MF | 7  | 1  | 562 | 19  | 19809 | 4.21E-01 |
| GO:0000146 | microfilament motor activity     | MF | 10 | 1  | 562 | 19  | 19809 | 4.21E-01 |
| GO:0006937 | regulation of muscle contracti   | BP | 8  | 1  | 562 | 19  | 19809 | 4.21E-01 |

|            |                                                              |    |    |     |     |      |       |          |
|------------|--------------------------------------------------------------|----|----|-----|-----|------|-------|----------|
| GO:1902236 | negative regulation of endoplasmic reticulum protein folding | BP | 9  | 1   | 562 | 19   | 19809 | 4.21E-01 |
| GO:0090201 | negative regulation of release of neurotransmitter           | BP | 10 | 1   | 562 | 19   | 19809 | 4.21E-01 |
| GO:0035338 | long-chain fatty-acyl-CoA biosynthesis                       | BP | 10 | 1   | 562 | 19   | 19809 | 4.21E-01 |
| GO:0046655 | folic acid metabolic process                                 | BP | 7  | 1   | 562 | 19   | 19809 | 4.21E-01 |
| GO:0048265 | response to pain                                             | BP | 6  | 1   | 562 | 19   | 19809 | 4.21E-01 |
| GO:1900017 | positive regulation of cytokine production                   | BP | 8  | 1   | 562 | 19   | 19809 | 4.21E-01 |
| GO:0071354 | cellular response to interleukin-1                           | BP | 8  | 1   | 562 | 19   | 19809 | 4.21E-01 |
| GO:0045582 | positive regulation of T cell differentiation                | BP | 10 | 1   | 562 | 19   | 19809 | 4.21E-01 |
| GO:0060546 | negative regulation of necroptosis                           | BP | 10 | 1   | 562 | 19   | 19809 | 4.21E-01 |
| GO:0048821 | erythrocyte development                                      | BP | 7  | 1   | 562 | 19   | 19809 | 4.21E-01 |
| GO:0070971 | endoplasmic reticulum exit site                              | CC | 7  | 1   | 562 | 19   | 19809 | 4.21E-01 |
| GO:0006939 | smooth muscle contraction                                    | BP | 7  | 1   | 562 | 19   | 19809 | 4.21E-01 |
| GO:0071397 | cellular response to cholesterol                             | BP | 9  | 1   | 562 | 19   | 19809 | 4.21E-01 |
| GO:0090190 | positive regulation of branching morphogenesis               | BP | 10 | 1   | 562 | 19   | 19809 | 4.21E-01 |
| GO:0030539 | male genitalia development                                   | BP | 7  | 1   | 562 | 19   | 19809 | 4.21E-01 |
| GO:0006998 | nuclear envelope organization                                | BP | 6  | 1   | 562 | 19   | 19809 | 4.21E-01 |
| GO:0043034 | costamere                                                    | CC | 5  | 1   | 562 | 19   | 19809 | 4.21E-01 |
| GO:0042311 | vasodilation                                                 | BP | 10 | 1   | 562 | 19   | 19809 | 4.21E-01 |
| GO:0030279 | negative regulation of ossification                          | BP | 7  | 1   | 562 | 19   | 19809 | 4.21E-01 |
| GO:0022904 | respiratory electron transport chain                         | BP | 7  | 1   | 562 | 19   | 19809 | 4.21E-01 |
| GO:0070932 | histone H3 deacetylation                                     | BP | 12 | 1   | 562 | 19   | 19809 | 4.21E-01 |
| GO:0030220 | platelet formation                                           | BP | 7  | 1   | 562 | 19   | 19809 | 4.21E-01 |
| GO:0034314 | Arp2/3 complex-mediated actin polymerization                 | BP | 8  | 1   | 562 | 19   | 19809 | 4.21E-01 |
| GO:0010812 | negative regulation of cell-substrate adhesion               | BP | 7  | 1   | 562 | 19   | 19809 | 4.21E-01 |
| GO:0046597 | negative regulation of viral entry                           | BP | 10 | 1   | 562 | 19   | 19809 | 4.21E-01 |
| GO:0031290 | retinal ganglion cell axon guidance                          | BP | 7  | 1   | 562 | 19   | 19809 | 4.21E-01 |
| GO:0006337 | nucleosome disassembly                                       | BP | 8  | 1   | 562 | 19   | 19809 | 4.21E-01 |
| GO:0008284 | positive regulation of cell population growth                | BP | 7  | 17  | 562 | 561  | 19809 | 4.25E-01 |
| GO:0009755 | hormone-mediated signaling pathway                           | BP | 5  | 2   | 562 | 51   | 19809 | 4.27E-01 |
| GO:0004402 | histone acetyltransferase activity                           | MF | 11 | 2   | 562 | 51   | 19809 | 4.27E-01 |
| GO:0048146 | positive regulation of fibroblast proliferation              | BP | 8  | 2   | 562 | 51   | 19809 | 4.27E-01 |
| GO:0006091 | generation of precursor metabolites and energy               | BP | 5  | 2   | 562 | 51   | 19809 | 4.27E-01 |
| GO:0008047 | enzyme activator activity                                    | MF | 5  | 2   | 562 | 51   | 19809 | 4.27E-01 |
| GO:0045785 | positive regulation of cell adhesion                         | BP | 6  | 2   | 562 | 51   | 19809 | 4.27E-01 |
| GO:0008013 | beta-catenin binding                                         | MF | 5  | 3   | 562 | 84   | 19809 | 4.28E-01 |
| GO:0000976 | transcription regulatory region                              | MF | 8  | 3   | 562 | 84   | 19809 | 4.28E-01 |
| GO:0042995 | cell projection                                              | CC | 4  | 29  | 562 | 978  | 19809 | 4.30E-01 |
| GO:0000978 | RNA polymerase II proximal promoter                          | MF | 10 | 15  | 562 | 494  | 19809 | 4.31E-01 |
| GO:0004713 | protein tyrosine kinase activity                             | MF | 8  | 4   | 562 | 118  | 19809 | 4.31E-01 |
| GO:0005737 | cytoplasm                                                    | CC | 5  | 189 | 562 | 6581 | 19809 | 4.34E-01 |
| GO:0098685 | Schaffer collateral - CA1 synapse                            | CC | 4  | 3   | 562 | 85   | 19809 | 4.35E-01 |
| GO:0034644 | cellular response to UV                                      | BP | 8  | 2   | 562 | 52   | 19809 | 4.36E-01 |
| GO:0007269 | neurotransmitter secretion                                   | BP | 6  | 2   | 562 | 52   | 19809 | 4.36E-01 |
| GO:0030148 | sphingolipid biosynthetic process                            | BP | 9  | 2   | 562 | 52   | 19809 | 4.36E-01 |
| GO:0010942 | positive regulation of cell death                            | BP | 7  | 2   | 562 | 52   | 19809 | 4.36E-01 |
| GO:0040037 | negative regulation of fibroblast proliferation              | BP | 9  | 1   | 562 | 20   | 19809 | 4.38E-01 |
| GO:0032722 | positive regulation of chemokine production                  | BP | 8  | 1   | 562 | 20   | 19809 | 4.38E-01 |
| GO:0048011 | neurotrophin TRK receptor signaling                          | BP | 8  | 1   | 562 | 20   | 19809 | 4.38E-01 |
| GO:0001502 | cartilage condensation                                       | BP | 4  | 1   | 562 | 20   | 19809 | 4.38E-01 |
| GO:0060716 | labyrinthine layer blood vessel                              | BP | 7  | 1   | 562 | 20   | 19809 | 4.38E-01 |

|            |                                       |    |    |   |     |     |       |          |
|------------|---------------------------------------|----|----|---|-----|-----|-------|----------|
| GO:0001774 | microglial cell activation            | BP | 7  | 1 | 562 | 20  | 19809 | 4.38E-01 |
| GO:0045197 | establishment or maintenance of       | BP | 7  | 1 | 562 | 20  | 19809 | 4.38E-01 |
| GO:0045019 | negative regulation of nitric oxide   | BP | 9  | 1 | 562 | 20  | 19809 | 4.38E-01 |
| GO:0007413 | axonal fasciculation                  | BP | 6  | 1 | 562 | 20  | 19809 | 4.38E-01 |
| GO:0045954 | positive regulation of natural killer | BP | 8  | 1 | 562 | 20  | 19809 | 4.38E-01 |
| GO:0016849 | phosphorus-oxygen lyase activity      | MF | 5  | 1 | 562 | 20  | 19809 | 4.38E-01 |
| GO:0002028 | regulation of sodium ion transport    | BP | 9  | 1 | 562 | 20  | 19809 | 4.38E-01 |
| GO:0048168 | regulation of neuronal synaptic       | BP | 10 | 1 | 562 | 20  | 19809 | 4.38E-01 |
| GO:0070542 | response to fatty acid                | BP | 6  | 1 | 562 | 20  | 19809 | 4.38E-01 |
| GO:0032006 | regulation of TOR signaling           | BP | 9  | 1 | 562 | 20  | 19809 | 4.38E-01 |
| GO:0000062 | fatty-acyl-CoA binding                | MF | 9  | 1 | 562 | 20  | 19809 | 4.38E-01 |
| GO:0006536 | glutamate metabolic process           | BP | 11 | 1 | 562 | 20  | 19809 | 4.38E-01 |
| GO:0006826 | iron ion transport                    | BP | 10 | 1 | 562 | 20  | 19809 | 4.38E-01 |
| GO:0042474 | middle ear morphogenesis              | BP | 6  | 1 | 562 | 20  | 19809 | 4.38E-01 |
| GO:0098632 | cell-cell adhesion mediator activity  | MF | 5  | 1 | 562 | 20  | 19809 | 4.38E-01 |
| GO:0004806 | triglyceride lipase activity          | MF | 7  | 1 | 562 | 20  | 19809 | 4.38E-01 |
| GO:0003678 | DNA helicase activity                 | MF | 10 | 1 | 562 | 20  | 19809 | 4.38E-01 |
| GO:0030048 | actin filament-based movement         | BP | 5  | 1 | 562 | 20  | 19809 | 4.38E-01 |
| GO:0010592 | positive regulation of lamellipodium  | BP | 11 | 1 | 562 | 20  | 19809 | 4.38E-01 |
| GO:0043046 | DNA methylation involved in           | BP | 11 | 1 | 562 | 20  | 19809 | 4.38E-01 |
| GO:0016234 | inclusion body                        | CC | 5  | 1 | 562 | 20  | 19809 | 4.38E-01 |
| GO:0030517 | negative regulation of axon extension | BP | 8  | 1 | 562 | 20  | 19809 | 4.38E-01 |
| GO:0042623 | ATPase activity, coupled              | MF | 10 | 1 | 562 | 20  | 19809 | 4.38E-01 |
| GO:0042832 | defense response to protozoan         | BP | 8  | 1 | 562 | 20  | 19809 | 4.38E-01 |
| GO:0009083 | branched-chain amino acid catabolism  | BP | 10 | 1 | 562 | 20  | 19809 | 4.38E-01 |
| GO:0032211 | negative regulation of telomere       | BP | 12 | 1 | 562 | 20  | 19809 | 4.38E-01 |
| GO:1901214 | regulation of neuron death            | BP | 7  | 1 | 562 | 20  | 19809 | 4.38E-01 |
| GO:0008408 | 3'-5' exonuclease activity            | MF | 8  | 1 | 562 | 20  | 19809 | 4.38E-01 |
| GO:0031641 | regulation of myelination             | BP | 6  | 1 | 562 | 20  | 19809 | 4.38E-01 |
| GO:0005868 | cytoplasmic dynein complex            | CC | 6  | 1 | 562 | 20  | 19809 | 4.38E-01 |
| GO:0034361 | very-low-density lipoprotein particle | CC | 6  | 1 | 562 | 20  | 19809 | 4.38E-01 |
| GO:0016922 | nuclear receptor binding              | MF | 8  | 1 | 562 | 20  | 19809 | 4.38E-01 |
| GO:0035050 | embryonic heart tube development      | BP | 6  | 1 | 562 | 20  | 19809 | 4.38E-01 |
| GO:0032088 | negative regulation of NF-kappaB      | BP | 7  | 3 | 562 | 86  | 19809 | 4.43E-01 |
| GO:0000226 | microtubule cytoskeleton organization | BP | 7  | 4 | 562 | 120 | 19809 | 4.44E-01 |
| GO:0007254 | JNK cascade                           | BP | 13 | 2 | 562 | 53  | 19809 | 4.46E-01 |
| GO:0043087 | regulation of GTPase activity         | BP | 7  | 3 | 562 | 87  | 19809 | 4.50E-01 |
| GO:0005720 | nuclear heterochromatin               | CC | 8  | 1 | 562 | 21  | 19809 | 4.54E-01 |
| GO:0071375 | cellular response to peptide hormone  | BP | 7  | 1 | 562 | 21  | 19809 | 4.54E-01 |
| GO:0060425 | lung morphogenesis                    | BP | 6  | 1 | 562 | 21  | 19809 | 4.54E-01 |
| GO:0035458 | cellular response to interferon-gamma | BP | 8  | 1 | 562 | 21  | 19809 | 4.54E-01 |
| GO:0070530 | K63-linked polyubiquitin modification | MF | 7  | 1 | 562 | 21  | 19809 | 4.54E-01 |
| GO:0045742 | positive regulation of epidermal      | BP | 10 | 1 | 562 | 21  | 19809 | 4.54E-01 |
| GO:0044306 | neuron projection terminus            | CC | 5  | 1 | 562 | 21  | 19809 | 4.54E-01 |
| GO:0033141 | positive regulation of peptidyl-      | BP | 12 | 1 | 562 | 21  | 19809 | 4.54E-01 |
| GO:0030904 | retromer complex                      | CC | 4  | 1 | 562 | 21  | 19809 | 4.54E-01 |
| GO:0045055 | regulated exocytosis                  | BP | 8  | 1 | 562 | 21  | 19809 | 4.54E-01 |
| GO:0045182 | translation regulator activity        | MF | 3  | 1 | 562 | 21  | 19809 | 4.54E-01 |
| GO:0060044 | negative regulation of cardiac        | BP | 8  | 1 | 562 | 21  | 19809 | 4.54E-01 |
| GO:0002042 | cell migration involved in sprouting  | BP | 11 | 1 | 562 | 21  | 19809 | 4.54E-01 |



|            |                                  |    |    |    |     |     |       |          |
|------------|----------------------------------|----|----|----|-----|-----|-------|----------|
| GO:0016597 | amino acid binding               | MF | 7  | 1  | 562 | 21  | 19809 | 4.54E-01 |
| GO:0071404 | cellular response to low-densit  | BP | 6  | 1  | 562 | 21  | 19809 | 4.54E-01 |
| GO:0007276 | gamete generation                | BP | 5  | 1  | 562 | 21  | 19809 | 4.54E-01 |
| GO:0006801 | superoxide metabolic process     | BP | 6  | 1  | 562 | 21  | 19809 | 4.54E-01 |
| GO:0070584 | mitochondrion morphogenesis      | BP | 7  | 1  | 562 | 21  | 19809 | 4.54E-01 |
| GO:0034067 | protein localization to Golgi ap | BP | 8  | 1  | 562 | 21  | 19809 | 4.54E-01 |
| GO:0035024 | negative regulation of Rho pro   | BP | 12 | 1  | 562 | 21  | 19809 | 4.54E-01 |
| GO:0017015 | regulation of transforming gro   | BP | 9  | 1  | 562 | 21  | 19809 | 4.54E-01 |
| GO:0001659 | temperature homeostasis          | BP | 5  | 1  | 562 | 21  | 19809 | 4.54E-01 |
| GO:0009235 | cobalamin metabolic process      | BP | 7  | 1  | 562 | 21  | 19809 | 4.54E-01 |
| GO:0005942 | phosphatidylinositol 3-kinase c  | CC | 7  | 1  | 562 | 21  | 19809 | 4.54E-01 |
| GO:0006796 | phosphate-containing compou      | BP | 6  | 1  | 562 | 21  | 19809 | 4.54E-01 |
| GO:0021522 | spinal cord motor neuron diffe   | BP | 7  | 1  | 562 | 21  | 19809 | 4.54E-01 |
| GO:0016601 | Rac protein signal transductor   | BP | 8  | 1  | 562 | 21  | 19809 | 4.54E-01 |
| GO:0045672 | positive regulation of osteoclas | BP | 10 | 1  | 562 | 21  | 19809 | 4.54E-01 |
| GO:0031410 | cytoplasmic vesicle              | CC | 6  | 21 | 562 | 710 | 19809 | 4.54E-01 |
| GO:0008344 | adult locomotory behavior        | BP | 5  | 2  | 562 | 54  | 19809 | 4.56E-01 |
| GO:0005070 | SH3/SH2 adaptor activity         | MF | 7  | 2  | 562 | 54  | 19809 | 4.56E-01 |
| GO:0001085 | RNA polymerase II transcripti    | MF | 6  | 2  | 562 | 54  | 19809 | 4.56E-01 |
| GO:1903779 | regulation of cardiac conductic  | BP | 9  | 2  | 562 | 54  | 19809 | 4.56E-01 |
| GO:0006468 | protein phosphorylation          | BP | 9  | 19 | 562 | 642 | 19809 | 4.58E-01 |
| GO:0008022 | protein C-terminus binding       | MF | 5  | 6  | 562 | 191 | 19809 | 4.58E-01 |
| GO:0016829 | lyase activity                   | MF | 4  | 5  | 562 | 157 | 19809 | 4.61E-01 |
| GO:0012507 | ER to Golgi transport vesicle r  | CC | 8  | 2  | 562 | 55  | 19809 | 4.65E-01 |
| GO:0035176 | social behavior                  | BP | 5  | 2  | 562 | 55  | 19809 | 4.65E-01 |
| GO:0042552 | myelination                      | BP | 6  | 2  | 562 | 55  | 19809 | 4.65E-01 |
| GO:0016573 | histone acetylation              | BP | 10 | 2  | 562 | 55  | 19809 | 4.65E-01 |
| GO:0031267 | small GTPase binding             | MF | 7  | 1  | 562 | 22  | 19809 | 4.69E-01 |
| GO:0017075 | syntaxin-1 binding               | MF | 7  | 1  | 562 | 22  | 19809 | 4.69E-01 |
| GO:0002052 | positive regulation of neurobla  | BP | 10 | 1  | 562 | 22  | 19809 | 4.69E-01 |
| GO:0045216 | cell-cell junction organization  | BP | 6  | 1  | 562 | 22  | 19809 | 4.69E-01 |
| GO:0030325 | adrenal gland development        | BP | 7  | 1  | 562 | 22  | 19809 | 4.69E-01 |
| GO:0045663 | positive regulation of myoblas   | BP | 8  | 1  | 562 | 22  | 19809 | 4.69E-01 |
| GO:0051899 | membrane depolarization          | BP | 6  | 1  | 562 | 22  | 19809 | 4.69E-01 |
| GO:0001894 | tissue homeostasis               | BP | 7  | 1  | 562 | 22  | 19809 | 4.69E-01 |
| GO:1900016 | negative regulation of cytokine  | BP | 8  | 1  | 562 | 22  | 19809 | 4.69E-01 |
| GO:1900273 | positive regulation of long-terr | BP | 9  | 1  | 562 | 22  | 19809 | 4.69E-01 |
| GO:0006541 | glutamine metabolic process      | BP | 11 | 1  | 562 | 22  | 19809 | 4.69E-01 |
| GO:0043548 | phosphatidylinositol 3-kinase l  | MF | 5  | 1  | 562 | 22  | 19809 | 4.69E-01 |
| GO:0097150 | neuronal stem cell population    | BP | 5  | 1  | 562 | 22  | 19809 | 4.69E-01 |
| GO:1903861 | positive regulation of dendrite  | BP | 12 | 1  | 562 | 22  | 19809 | 4.69E-01 |
| GO:0001953 | negative regulation of cell-mat  | BP | 8  | 1  | 562 | 22  | 19809 | 4.69E-01 |
| GO:0042629 | mast cell granule                | CC | 9  | 1  | 562 | 22  | 19809 | 4.69E-01 |
| GO:0050321 | tau-protein kinase activity      | MF | 8  | 1  | 562 | 22  | 19809 | 4.69E-01 |
| GO:0005112 | Notch binding                    | MF | 6  | 1  | 562 | 22  | 19809 | 4.69E-01 |
| GO:0014066 | regulation of phosphatidylinos   | BP | 9  | 1  | 562 | 22  | 19809 | 4.69E-01 |
| GO:1990138 | neuron projection extension      | BP | 6  | 1  | 562 | 22  | 19809 | 4.69E-01 |
| GO:0005158 | insulin receptor binding         | MF | 6  | 1  | 562 | 22  | 19809 | 4.69E-01 |
| GO:0016279 | protein-lysine N-methyltransfe   | MF | 8  | 1  | 562 | 22  | 19809 | 4.69E-01 |
| GO:0030215 | semaphorin receptor binding      | MF | 6  | 1  | 562 | 22  | 19809 | 4.69E-01 |

|            |                                  |    |    |    |     |      |       |          |
|------------|----------------------------------|----|----|----|-----|------|-------|----------|
| GO:0032588 | trans-Golgi network membran      | CC | 8  | 3  | 562 | 90   | 19809 | 4.72E-01 |
| GO:0048468 | cell development                 | BP | 5  | 2  | 562 | 56   | 19809 | 4.74E-01 |
| GO:0032508 | DNA duplex unwinding             | BP | 9  | 2  | 562 | 56   | 19809 | 4.74E-01 |
| GO:0008081 | phosphoric diester hydrolase a   | MF | 7  | 2  | 562 | 56   | 19809 | 4.74E-01 |
| GO:0007623 | circadian rhythm                 | BP | 4  | 3  | 562 | 91   | 19809 | 4.79E-01 |
| GO:0017124 | SH3 domain binding               | MF | 6  | 4  | 562 | 126  | 19809 | 4.82E-01 |
| GO:0031047 | gene silencing by RNA            | BP | 5  | 2  | 562 | 57   | 19809 | 4.84E-01 |
| GO:0060348 | bone development                 | BP | 6  | 2  | 562 | 57   | 19809 | 4.84E-01 |
| GO:0017053 | transcriptional repressor comp   | CC | 4  | 2  | 562 | 57   | 19809 | 4.84E-01 |
| GO:0006865 | amino acid transport             | BP | 10 | 2  | 562 | 57   | 19809 | 4.84E-01 |
| GO:0009792 | embryo development ending ir     | BP | 6  | 1  | 562 | 23   | 19809 | 4.84E-01 |
| GO:0030687 | preribosome, large subunit pre   | CC | 6  | 1  | 562 | 23   | 19809 | 4.84E-01 |
| GO:0060122 | inner ear receptor cell stereoci | BP | 8  | 1  | 562 | 23   | 19809 | 4.84E-01 |
| GO:0001676 | long-chain fatty acid metabolic  | BP | 10 | 1  | 562 | 23   | 19809 | 4.84E-01 |
| GO:0005680 | anaphase-promoting complex       | CC | 7  | 1  | 562 | 23   | 19809 | 4.84E-01 |
| GO:0035904 | aorta development                | BP | 7  | 1  | 562 | 23   | 19809 | 4.84E-01 |
| GO:0030500 | regulation of bone mineralizati  | BP | 7  | 1  | 562 | 23   | 19809 | 4.84E-01 |
| GO:0035235 | ionotropic glutamate receptor s  | BP | 7  | 1  | 562 | 23   | 19809 | 4.84E-01 |
| GO:0060307 | regulation of ventricular cardia | BP | 11 | 1  | 562 | 23   | 19809 | 4.84E-01 |
| GO:0090023 | positive regulation of neutroph  | BP | 10 | 1  | 562 | 23   | 19809 | 4.84E-01 |
| GO:0008198 | ferrous iron binding             | MF | 9  | 1  | 562 | 23   | 19809 | 4.84E-01 |
| GO:0031954 | positive regulation of protein a | BP | 11 | 1  | 562 | 23   | 19809 | 4.84E-01 |
| GO:0097228 | sperm principal piece            | CC | 5  | 1  | 562 | 23   | 19809 | 4.84E-01 |
| GO:0017134 | fibroblast growth factor bindin  | MF | 6  | 1  | 562 | 23   | 19809 | 4.84E-01 |
| GO:0045104 | intermediate filament cytoskel   | BP | 7  | 1  | 562 | 23   | 19809 | 4.84E-01 |
| GO:0033344 | cholesterol efflux               | BP | 10 | 1  | 562 | 23   | 19809 | 4.84E-01 |
| GO:0046961 | proton-transporting ATPase ac    | MF | 10 | 1  | 562 | 23   | 19809 | 4.84E-01 |
| GO:0009880 | embryonic pattern specificatio   | BP | 5  | 1  | 562 | 23   | 19809 | 4.84E-01 |
| GO:0005548 | phospholipid transporter activi  | MF | 5  | 1  | 562 | 23   | 19809 | 4.84E-01 |
| GO:0001824 | blastocyst development           | BP | 5  | 1  | 562 | 23   | 19809 | 4.84E-01 |
| GO:0006672 | ceramide metabolic process       | BP | 9  | 1  | 562 | 23   | 19809 | 4.84E-01 |
| GO:1905564 | positive regulation of vascular  | BP | 10 | 1  | 562 | 23   | 19809 | 4.84E-01 |
| GO:0070412 | R-SMAD binding                   | MF | 6  | 1  | 562 | 23   | 19809 | 4.84E-01 |
| GO:0097225 | sperm midpiece                   | CC | 5  | 1  | 562 | 23   | 19809 | 4.84E-01 |
| GO:0044389 | ubiquitin-like protein ligase bi | MF | 6  | 1  | 562 | 23   | 19809 | 4.84E-01 |
| GO:0006457 | protein folding                  | BP | 4  | 5  | 562 | 162  | 19809 | 4.88E-01 |
| GO:0006629 | lipid metabolic process          | BP | 5  | 16 | 562 | 548  | 19809 | 4.89E-01 |
| GO:0006357 | regulation of transcription by I | BP | 9  | 36 | 562 | 1252 | 19809 | 4.92E-01 |
| GO:0019827 | stem cell population maintenar   | BP | 4  | 2  | 562 | 58   | 19809 | 4.93E-01 |
| GO:0005507 | copper ion binding               | MF | 8  | 2  | 562 | 58   | 19809 | 4.93E-01 |
| GO:0055114 | oxidation-reduction process      | BP | 4  | 21 | 562 | 725  | 19809 | 4.93E-01 |
| GO:0032587 | ruffle membrane                  | CC | 6  | 3  | 562 | 93   | 19809 | 4.94E-01 |
| GO:0010008 | endosome membrane                | CC | 8  | 7  | 562 | 234  | 19809 | 4.97E-01 |
| GO:2000378 | negative regulation of reactive  | BP | 8  | 1  | 562 | 24   | 19809 | 4.99E-01 |
| GO:0008585 | female gonad development         | BP | 7  | 1  | 562 | 24   | 19809 | 4.99E-01 |
| GO:0030595 | leukocyte chemotaxis             | BP | 5  | 1  | 562 | 24   | 19809 | 4.99E-01 |
| GO:0034383 | low-density lipoprotein particl  | BP | 5  | 1  | 562 | 24   | 19809 | 4.99E-01 |
| GO:0012501 | programmed cell death            | BP | 5  | 1  | 562 | 24   | 19809 | 4.99E-01 |
| GO:0034364 | high-density lipoprotein partic  | CC | 5  | 1  | 562 | 24   | 19809 | 4.99E-01 |
| GO:0060999 | positive regulation of dendritic | BP | 13 | 1  | 562 | 24   | 19809 | 4.99E-01 |

|            |                                   |    |    |    |     |     |       |          |
|------------|-----------------------------------|----|----|----|-----|-----|-------|----------|
| GO:0090398 | cellular senescence               | BP | 6  | 1  | 562 | 24  | 19809 | 4.99E-01 |
| GO:0010881 | regulation of cardiac muscle c    | BP | 9  | 1  | 562 | 24  | 19809 | 4.99E-01 |
| GO:0032733 | positive regulation of interleuk  | BP | 8  | 1  | 562 | 24  | 19809 | 4.99E-01 |
| GO:0003009 | skeletal muscle contraction       | BP | 8  | 1  | 562 | 24  | 19809 | 4.99E-01 |
| GO:0016831 | carboxy-lyase activity            | MF | 6  | 1  | 562 | 24  | 19809 | 4.99E-01 |
| GO:0015012 | heparan sulfate proteoglycan b    | BP | 10 | 1  | 562 | 24  | 19809 | 4.99E-01 |
| GO:0035567 | non-canonical Wnt signaling p     | BP | 8  | 1  | 562 | 24  | 19809 | 4.99E-01 |
| GO:0099560 | synaptic membrane adhesion        | BP | 7  | 1  | 562 | 24  | 19809 | 4.99E-01 |
| GO:0045453 | bone resorption                   | BP | 8  | 1  | 562 | 24  | 19809 | 4.99E-01 |
| GO:0045662 | negative regulation of myoblas    | BP | 8  | 1  | 562 | 24  | 19809 | 4.99E-01 |
| GO:0048814 | regulation of dendrite morpho     | BP | 9  | 1  | 562 | 24  | 19809 | 4.99E-01 |
| GO:0009954 | proximal/distal pattern formati   | BP | 6  | 1  | 562 | 24  | 19809 | 4.99E-01 |
| GO:0007626 | locomotory behavior               | BP | 4  | 3  | 562 | 94  | 19809 | 5.01E-01 |
| GO:0001725 | stress fiber                      | CC | 7  | 2  | 562 | 59  | 19809 | 5.02E-01 |
| GO:0015297 | antiporter activity               | MF | 7  | 2  | 562 | 59  | 19809 | 5.02E-01 |
| GO:0035861 | site of double-strand break       | CC | 7  | 2  | 562 | 59  | 19809 | 5.02E-01 |
| GO:0007409 | axonogenesis                      | BP | 9  | 3  | 562 | 95  | 19809 | 5.08E-01 |
| GO:0034097 | response to cytokine              | BP | 6  | 2  | 562 | 60  | 19809 | 5.11E-01 |
| GO:0009725 | response to hormone               | BP | 5  | 2  | 562 | 60  | 19809 | 5.11E-01 |
| GO:0001947 | heart looping                     | BP | 7  | 2  | 562 | 60  | 19809 | 5.11E-01 |
| GO:0016485 | protein processing                | BP | 8  | 2  | 562 | 60  | 19809 | 5.11E-01 |
| GO:0045171 | intercellular bridge              | CC | 4  | 2  | 562 | 60  | 19809 | 5.11E-01 |
| GO:0004674 | protein serine/threonine kinase   | MF | 8  | 12 | 562 | 414 | 19809 | 5.11E-01 |
| GO:0042981 | regulation of apoptotic process   | BP | 8  | 8  | 562 | 273 | 19809 | 5.13E-01 |
| GO:0005657 | replication fork                  | CC | 6  | 1  | 562 | 25  | 19809 | 5.13E-01 |
| GO:0002227 | innate immune response in mu      | BP | 7  | 1  | 562 | 25  | 19809 | 5.13E-01 |
| GO:0010613 | positive regulation of cardiac r  | BP | 10 | 1  | 562 | 25  | 19809 | 5.13E-01 |
| GO:0055074 | calcium ion homeostasis           | BP | 10 | 1  | 562 | 25  | 19809 | 5.13E-01 |
| GO:0097755 | positive regulation of blood ve   | BP | 9  | 1  | 562 | 25  | 19809 | 5.13E-01 |
| GO:0071901 | negative regulation of protein s  | BP | 12 | 1  | 562 | 25  | 19809 | 5.13E-01 |
| GO:0030866 | cortical actin cytoskeleton org   | BP | 8  | 1  | 562 | 25  | 19809 | 5.13E-01 |
| GO:0055010 | ventricular cardiac muscle tiss   | BP | 8  | 1  | 562 | 25  | 19809 | 5.13E-01 |
| GO:0090103 | cochlea morphogenesis             | BP | 6  | 1  | 562 | 25  | 19809 | 5.13E-01 |
| GO:2000377 | regulation of reactive oxygen s   | BP | 7  | 1  | 562 | 25  | 19809 | 5.13E-01 |
| GO:0045503 | dynein light chain binding        | MF | 5  | 1  | 562 | 25  | 19809 | 5.13E-01 |
| GO:0034394 | protein localization to cell surf | BP | 7  | 1  | 562 | 25  | 19809 | 5.13E-01 |
| GO:0048019 | receptor antagonist activity      | MF | 6  | 1  | 562 | 25  | 19809 | 5.13E-01 |
| GO:0035902 | response to immobilization str    | BP | 5  | 1  | 562 | 25  | 19809 | 5.13E-01 |
| GO:0032735 | positive regulation of interleuk  | BP | 8  | 1  | 562 | 25  | 19809 | 5.13E-01 |
| GO:0051233 | spindle midzone                   | CC | 6  | 1  | 562 | 25  | 19809 | 5.13E-01 |
| GO:0002474 | antigen processing and present    | BP | 6  | 1  | 562 | 25  | 19809 | 5.13E-01 |
| GO:0030878 | thyroid gland development         | BP | 7  | 1  | 562 | 25  | 19809 | 5.13E-01 |
| GO:0008135 | translation factor activity, RN/  | MF | 7  | 1  | 562 | 25  | 19809 | 5.13E-01 |
| GO:0031116 | positive regulation of microtut   | BP | 10 | 1  | 562 | 25  | 19809 | 5.13E-01 |
| GO:0010499 | proteasomal ubiquitin-indepen     | BP | 9  | 1  | 562 | 25  | 19809 | 5.13E-01 |
| GO:0015035 | protein disulfide oxidoreducta    | MF | 7  | 1  | 562 | 25  | 19809 | 5.13E-01 |
| GO:0051018 | protein kinase A binding          | MF | 5  | 1  | 562 | 25  | 19809 | 5.13E-01 |
| GO:0001944 | vasculature development           | BP | 6  | 1  | 562 | 25  | 19809 | 5.13E-01 |
| GO:1900182 | positive regulation of protein l  | BP | 9  | 1  | 562 | 25  | 19809 | 5.13E-01 |
| GO:0045666 | positive regulation of neuron d   | BP | 10 | 3  | 562 | 96  | 19809 | 5.15E-01 |

|            |                                   |    |    |    |     |     |       |          |
|------------|-----------------------------------|----|----|----|-----|-----|-------|----------|
| GO:0016310 | phosphorylation                   | BP | 7  | 20 | 562 | 700 | 19809 | 5.20E-01 |
| GO:2000134 | negative regulation of G1/S tra   | BP | 10 | 2  | 562 | 61  | 19809 | 5.20E-01 |
| GO:0099056 | integral component of presyna     | CC | 6  | 2  | 562 | 61  | 19809 | 5.20E-01 |
| GO:0035064 | methylated histone binding        | MF | 6  | 2  | 562 | 61  | 19809 | 5.20E-01 |
| GO:0000079 | regulation of cyclin-dependent    | BP | 12 | 2  | 562 | 61  | 19809 | 5.20E-01 |
| GO:0009636 | response to toxic substance       | BP | 5  | 3  | 562 | 97  | 19809 | 5.22E-01 |
| GO:0005874 | microtubule                       | CC | 7  | 10 | 562 | 347 | 19809 | 5.25E-01 |
| GO:0048041 | focal adhesion assembly           | BP | 9  | 1  | 562 | 26  | 19809 | 5.27E-01 |
| GO:1990782 | protein tyrosine kinase binding   | MF | 8  | 1  | 562 | 26  | 19809 | 5.27E-01 |
| GO:0043015 | gamma-tubulin binding             | MF | 7  | 1  | 562 | 26  | 19809 | 5.27E-01 |
| GO:0042162 | telomeric DNA binding             | MF | 8  | 1  | 562 | 26  | 19809 | 5.27E-01 |
| GO:0030206 | chondroitin sulfate biosynthesi   | BP | 9  | 1  | 562 | 26  | 19809 | 5.27E-01 |
| GO:0000188 | inactivation of MAPK activity     | BP | 13 | 1  | 562 | 26  | 19809 | 5.27E-01 |
| GO:0045499 | chemorepellent activity           | MF | 7  | 1  | 562 | 26  | 19809 | 5.27E-01 |
| GO:1903588 | negative regulation of blood ve   | BP | 10 | 1  | 562 | 26  | 19809 | 5.27E-01 |
| GO:0043403 | skeletal muscle tissue regenera   | BP | 7  | 1  | 562 | 26  | 19809 | 5.27E-01 |
| GO:0005719 | nuclear euchromatin               | CC | 8  | 1  | 562 | 26  | 19809 | 5.27E-01 |
| GO:0035257 | nuclear hormone receptor bind     | MF | 7  | 1  | 562 | 26  | 19809 | 5.27E-01 |
| GO:0004407 | histone deacetylase activity      | MF | 7  | 1  | 562 | 26  | 19809 | 5.27E-01 |
| GO:0004435 | phosphatidylinositol phospholi    | MF | 9  | 1  | 562 | 26  | 19809 | 5.27E-01 |
| GO:0070372 | regulation of ERK1 and ERK2       | BP | 11 | 1  | 562 | 26  | 19809 | 5.27E-01 |
| GO:0016627 | oxidoreductase activity, acting   | MF | 5  | 1  | 562 | 26  | 19809 | 5.27E-01 |
| GO:0031018 | endocrine pancreas developme      | BP | 5  | 1  | 562 | 26  | 19809 | 5.27E-01 |
| GO:0030261 | chromosome condensation           | BP | 9  | 1  | 562 | 26  | 19809 | 5.27E-01 |
| GO:0042755 | eating behavior                   | BP | 5  | 1  | 562 | 26  | 19809 | 5.27E-01 |
| GO:0051090 | regulation of DNA-binding tra     | BP | 9  | 1  | 562 | 26  | 19809 | 5.27E-01 |
| GO:0045861 | negative regulation of proteoly   | BP | 9  | 1  | 562 | 26  | 19809 | 5.27E-01 |
| GO:0022400 | regulation of rhodopsin mediat    | BP | 9  | 1  | 562 | 26  | 19809 | 5.27E-01 |
| GO:0098586 | cellular response to virus        | BP | 8  | 1  | 562 | 26  | 19809 | 5.27E-01 |
| GO:0045334 | clathrin-coated endocytic vesic   | CC | 9  | 1  | 562 | 26  | 19809 | 5.27E-01 |
| GO:0009967 | positive regulation of signal tra | BP | 8  | 2  | 562 | 62  | 19809 | 5.29E-01 |
| GO:0035580 | specific granule lumen            | CC | 8  | 2  | 562 | 62  | 19809 | 5.29E-01 |
| GO:0016605 | PML body                          | CC | 8  | 3  | 562 | 98  | 19809 | 5.29E-01 |
| GO:0019900 | kinase binding                    | MF | 6  | 3  | 562 | 98  | 19809 | 5.29E-01 |
| GO:0005770 | late endosome                     | CC | 8  | 4  | 562 | 135 | 19809 | 5.36E-01 |
| GO:0030133 | transport vesicle                 | CC | 7  | 3  | 562 | 99  | 19809 | 5.36E-01 |
| GO:0048208 | COPII vesicle coating             | BP | 8  | 2  | 562 | 63  | 19809 | 5.37E-01 |
| GO:0005902 | microvillus                       | CC | 7  | 2  | 562 | 63  | 19809 | 5.37E-01 |
| GO:0043086 | negative regulation of catalytic  | BP | 6  | 2  | 562 | 63  | 19809 | 5.37E-01 |
| GO:0015721 | bile acid and bile salt transport | BP | 8  | 1  | 562 | 27  | 19809 | 5.40E-01 |
| GO:0043409 | negative regulation of MAPK i     | BP | 11 | 1  | 562 | 27  | 19809 | 5.40E-01 |
| GO:0032809 | neuronal cell body membrane       | CC | 6  | 1  | 562 | 27  | 19809 | 5.40E-01 |
| GO:0019897 | extrinsic component of plasma     | CC | 5  | 1  | 562 | 27  | 19809 | 5.40E-01 |
| GO:0006261 | DNA-dependent DNA replicat        | BP | 9  | 1  | 562 | 27  | 19809 | 5.40E-01 |
| GO:0004004 | ATP-dependent RNA helicase        | MF | 11 | 1  | 562 | 27  | 19809 | 5.40E-01 |
| GO:0031519 | PcG protein complex               | CC | 4  | 1  | 562 | 27  | 19809 | 5.40E-01 |
| GO:0070371 | ERK1 and ERK2 cascade             | BP | 12 | 1  | 562 | 27  | 19809 | 5.40E-01 |
| GO:0004114 | 3',5'-cyclic-nucleotide phosphc   | MF | 9  | 1  | 562 | 27  | 19809 | 5.40E-01 |
| GO:0001968 | fibronectin binding               | MF | 5  | 1  | 562 | 27  | 19809 | 5.40E-01 |
| GO:0022604 | regulation of cell morphogene     | BP | 7  | 1  | 562 | 27  | 19809 | 5.40E-01 |

|            |                                  |    |    |    |     |      |       |          |
|------------|----------------------------------|----|----|----|-----|------|-------|----------|
| GO:0031210 | phosphatidylcholine binding      | MF | 6  | 1  | 562 | 27   | 19809 | 5.40E-01 |
| GO:0005540 | hyaluronic acid binding          | MF | 6  | 1  | 562 | 27   | 19809 | 5.40E-01 |
| GO:0032689 | negative regulation of interferc | BP | 8  | 1  | 562 | 27   | 19809 | 5.40E-01 |
| GO:1903672 | positive regulation of sproutin  | BP | 9  | 1  | 562 | 27   | 19809 | 5.40E-01 |
| GO:0000027 | ribosomal large subunit assembl  | BP | 9  | 1  | 562 | 27   | 19809 | 5.40E-01 |
| GO:0033137 | negative regulation of peptidyl  | BP | 11 | 1  | 562 | 27   | 19809 | 5.40E-01 |
| GO:0008021 | synaptic vesicle                 | CC | 4  | 4  | 562 | 136  | 19809 | 5.41E-01 |
| GO:0007249 | I-kappaB kinase/NF-kappaB si     | BP | 6  | 2  | 562 | 64   | 19809 | 5.46E-01 |
| GO:0043408 | regulation of MAPK cascade       | BP | 10 | 2  | 562 | 64   | 19809 | 5.46E-01 |
| GO:0097190 | apoptotic signaling pathway      | BP | 5  | 2  | 562 | 64   | 19809 | 5.46E-01 |
| GO:0003697 | single-stranded DNA binding      | MF | 7  | 3  | 562 | 101  | 19809 | 5.49E-01 |
| GO:0007218 | neuropeptide signaling pathwa    | BP | 6  | 3  | 562 | 101  | 19809 | 5.49E-01 |
| GO:0000278 | mitotic cell cycle               | BP | 5  | 5  | 562 | 174  | 19809 | 5.51E-01 |
| GO:0010332 | response to gamma radiation      | BP | 7  | 1  | 562 | 28   | 19809 | 5.54E-01 |
| GO:0090383 | phagosome acidification          | BP | 13 | 1  | 562 | 28   | 19809 | 5.54E-01 |
| GO:0001835 | blastocyst hatching              | BP | 6  | 1  | 562 | 28   | 19809 | 5.54E-01 |
| GO:0007422 | peripheral nervous system dev    | BP | 6  | 1  | 562 | 28   | 19809 | 5.54E-01 |
| GO:0030507 | spectrin binding                 | MF | 6  | 1  | 562 | 28   | 19809 | 5.54E-01 |
| GO:0032757 | positive regulation of interleuk | BP | 8  | 1  | 562 | 28   | 19809 | 5.54E-01 |
| GO:0044295 | axonal growth cone               | CC | 6  | 1  | 562 | 28   | 19809 | 5.54E-01 |
| GO:0004181 | metallocarboxypeptidase activ    | MF | 9  | 1  | 562 | 28   | 19809 | 5.54E-01 |
| GO:0007159 | leukocyte cell-cell adhesion     | BP | 6  | 1  | 562 | 28   | 19809 | 5.54E-01 |
| GO:0045776 | negative regulation of blood pr  | BP | 6  | 1  | 562 | 28   | 19809 | 5.54E-01 |
| GO:0010971 | positive regulation of G2/M tra  | BP | 10 | 1  | 562 | 28   | 19809 | 5.54E-01 |
| GO:0050770 | regulation of axonogenesis       | BP | 9  | 1  | 562 | 28   | 19809 | 5.54E-01 |
| GO:0005790 | smooth endoplasmic reticulum     | CC | 7  | 1  | 562 | 28   | 19809 | 5.54E-01 |
| GO:0030136 | clathrin-coated vesicle          | CC | 8  | 2  | 562 | 65   | 19809 | 5.54E-01 |
| GO:0007612 | learning                         | BP | 5  | 2  | 562 | 65   | 19809 | 5.54E-01 |
| GO:0050680 | negative regulation of epitheli  | BP | 8  | 2  | 562 | 65   | 19809 | 5.54E-01 |
| GO:0005524 | ATP binding                      | MF | 5  | 42 | 562 | 1499 | 19809 | 5.58E-01 |
| GO:0050821 | protein stabilization            | BP | 6  | 5  | 562 | 176  | 19809 | 5.62E-01 |
| GO:0051865 | protein autoubiquitination       | BP | 12 | 2  | 562 | 66   | 19809 | 5.62E-01 |
| GO:0005776 | autophagosome                    | CC | 7  | 2  | 562 | 66   | 19809 | 5.62E-01 |
| GO:0005768 | endosome                         | CC | 7  | 18 | 562 | 645  | 19809 | 5.63E-01 |
| GO:0005198 | structural molecule activity     | MF | 3  | 7  | 562 | 249  | 19809 | 5.63E-01 |
| GO:0048514 | blood vessel morphogenesis       | BP | 6  | 1  | 562 | 29   | 19809 | 5.66E-01 |
| GO:0050873 | brown fat cell differentiation   | BP | 7  | 1  | 562 | 29   | 19809 | 5.66E-01 |
| GO:0043001 | Golgi to plasma membrane prc     | BP | 10 | 1  | 562 | 29   | 19809 | 5.66E-01 |
| GO:0015267 | channel activity                 | MF | 6  | 1  | 562 | 29   | 19809 | 5.66E-01 |
| GO:0004712 | protein serine/threonine/tyrosi  | MF | 8  | 1  | 562 | 29   | 19809 | 5.66E-01 |
| GO:0004129 | cytochrome-c oxidase activity    | MF | 6  | 1  | 562 | 29   | 19809 | 5.66E-01 |
| GO:0030001 | metal ion transport              | BP | 8  | 1  | 562 | 29   | 19809 | 5.66E-01 |
| GO:0007569 | cell aging                       | BP | 5  | 1  | 562 | 29   | 19809 | 5.66E-01 |
| GO:0048663 | neuron fate commitment           | BP | 6  | 1  | 562 | 29   | 19809 | 5.66E-01 |
| GO:0051959 | dynein light intermediate chair  | MF | 5  | 1  | 562 | 29   | 19809 | 5.66E-01 |
| GO:0010803 | regulation of tumor necrosis fa  | BP | 9  | 1  | 562 | 29   | 19809 | 5.66E-01 |
| GO:0007129 | synapsis                         | BP | 8  | 1  | 562 | 29   | 19809 | 5.66E-01 |
| GO:0051085 | chaperone cofactor-dependent     | BP | 7  | 1  | 562 | 29   | 19809 | 5.66E-01 |
| GO:0035249 | synaptic transmission, glutama   | BP | 10 | 1  | 562 | 29   | 19809 | 5.66E-01 |
| GO:0061512 | protein localization to cilium   | BP | 8  | 1  | 562 | 29   | 19809 | 5.66E-01 |

|            |                                  |    |    |    |     |      |       |          |
|------------|----------------------------------|----|----|----|-----|------|-------|----------|
| GO:0019933 | cAMP-mediated signaling          | BP | 8  | 1  | 562 | 29   | 19809 | 5.66E-01 |
| GO:0005261 | cation channel activity          | MF | 7  | 1  | 562 | 29   | 19809 | 5.66E-01 |
| GO:0021537 | telencephalon development        | BP | 5  | 1  | 562 | 29   | 19809 | 5.66E-01 |
| GO:0043539 | protein serine/threonine kinase  | MF | 8  | 1  | 562 | 29   | 19809 | 5.66E-01 |
| GO:0006378 | mRNA polyadenylation             | BP | 12 | 1  | 562 | 29   | 19809 | 5.66E-01 |
| GO:0031016 | pancreas development             | BP | 6  | 1  | 562 | 29   | 19809 | 5.66E-01 |
| GO:0035198 | miRNA binding                    | MF | 8  | 1  | 562 | 29   | 19809 | 5.66E-01 |
| GO:0030449 | regulation of complement activ   | BP | 7  | 3  | 562 | 104  | 19809 | 5.69E-01 |
| GO:0008565 | protein transporter activity     | MF |    | 2  | 562 | 67   | 19809 | 5.71E-01 |
| GO:0001932 | regulation of protein phosphor   | BP | 9  | 2  | 562 | 67   | 19809 | 5.71E-01 |
| GO:0043565 | sequence-specific DNA bindin     | MF | 7  | 18 | 562 | 648  | 19809 | 5.71E-01 |
| GO:0003676 | nucleic acid binding             | MF | 5  | 40 | 562 | 1435 | 19809 | 5.71E-01 |
| GO:0000287 | magnesium ion binding            | MF | 7  | 6  | 562 | 215  | 19809 | 5.74E-01 |
| GO:0004386 | helicase activity                | MF | 9  | 4  | 562 | 142  | 19809 | 5.76E-01 |
| GO:0009952 | anterior/posterior pattern speci | BP | 6  | 3  | 562 | 105  | 19809 | 5.76E-01 |
| GO:0006362 | transcription elongation from I  | BP | 9  | 1  | 562 | 30   | 19809 | 5.79E-01 |
| GO:0005774 | vacuolar membrane                | CC | 7  | 1  | 562 | 30   | 19809 | 5.79E-01 |
| GO:0045505 | dynein intermediate chain binc   | MF | 5  | 1  | 562 | 30   | 19809 | 5.79E-01 |
| GO:0015991 | ATP hydrolysis coupled protol    | BP | 11 | 1  | 562 | 30   | 19809 | 5.79E-01 |
| GO:0070979 | protein K11-linked ubiquitinat   | BP | 13 | 1  | 562 | 30   | 19809 | 5.79E-01 |
| GO:0090314 | positive regulation of protein t | BP | 11 | 1  | 562 | 30   | 19809 | 5.79E-01 |
| GO:0090200 | positive regulation of release o | BP | 10 | 1  | 562 | 30   | 19809 | 5.79E-01 |
| GO:0015698 | inorganic anion transport        | BP | 8  | 1  | 562 | 30   | 19809 | 5.79E-01 |
| GO:0051276 | chromosome organization          | BP | 6  | 1  | 562 | 30   | 19809 | 5.79E-01 |
| GO:0007202 | activation of phospholipase C    | BP | 11 | 1  | 562 | 30   | 19809 | 5.79E-01 |
| GO:0038111 | interleukin-7-mediated signalin  | BP | 7  | 1  | 562 | 30   | 19809 | 5.79E-01 |
| GO:0033116 | endoplasmic reticulum-Golgi i    | CC | 6  | 2  | 562 | 68   | 19809 | 5.79E-01 |
| GO:0005741 | mitochondrial outer membrane     | CC | 6  | 5  | 562 | 181  | 19809 | 5.87E-01 |
| GO:0009267 | cellular response to starvation  | BP | 8  | 2  | 562 | 69   | 19809 | 5.87E-01 |
| GO:0031398 | positive regulation of protein t | BP | 11 | 2  | 562 | 69   | 19809 | 5.87E-01 |
| GO:0003725 | double-stranded RNA binding      | MF | 7  | 2  | 562 | 69   | 19809 | 5.87E-01 |
| GO:0001558 | regulation of cell growth        | BP | 6  | 2  | 562 | 69   | 19809 | 5.87E-01 |
| GO:0006417 | regulation of translation        | BP | 9  | 4  | 562 | 144  | 19809 | 5.87E-01 |
| GO:0004003 | ATP-dependent DNA helicase       | MF | 11 | 1  | 562 | 31   | 19809 | 5.91E-01 |
| GO:0038128 | ERBB2 signaling pathway          | BP | 9  | 1  | 562 | 31   | 19809 | 5.91E-01 |
| GO:0098664 | G protein-coupled serotonin re   | BP | 6  | 1  | 562 | 31   | 19809 | 5.91E-01 |
| GO:2000145 | regulation of cell motility      | BP | 6  | 1  | 562 | 31   | 19809 | 5.91E-01 |
| GO:0005771 | multivesicular body              | CC | 9  | 1  | 562 | 31   | 19809 | 5.91E-01 |
| GO:0060076 | excitatory synapse               | CC | 4  | 1  | 562 | 31   | 19809 | 5.91E-01 |
| GO:0017080 | sodium channel regulator activ   | MF | 5  | 1  | 562 | 31   | 19809 | 5.91E-01 |
| GO:0017156 | calcium ion regulated exocytos   | BP | 9  | 1  | 562 | 31   | 19809 | 5.91E-01 |
| GO:0044853 | plasma membrane raft             | CC | 7  | 1  | 562 | 31   | 19809 | 5.91E-01 |
| GO:0007586 | digestion                        | BP | 4  | 1  | 562 | 31   | 19809 | 5.91E-01 |
| GO:0045664 | regulation of neuron differenti  | BP | 9  | 1  | 562 | 31   | 19809 | 5.91E-01 |
| GO:0006363 | termination of RNA polymeras     | BP | 9  | 1  | 562 | 31   | 19809 | 5.91E-01 |
| GO:2000310 | regulation of NMDA receptor      | BP | 10 | 1  | 562 | 31   | 19809 | 5.91E-01 |
| GO:0097193 | intrinsic apoptotic signaling pa | BP | 6  | 1  | 562 | 31   | 19809 | 5.91E-01 |
| GO:0098609 | cell-cell adhesion               | BP | 5  | 4  | 562 | 145  | 19809 | 5.92E-01 |
| GO:0030900 | forebrain development            | BP | 5  | 2  | 562 | 70   | 19809 | 5.95E-01 |
| GO:0006633 | fatty acid biosynthetic process  | BP | 10 | 2  | 562 | 70   | 19809 | 5.95E-01 |

|            |                                   |    |    |   |     |     |       |          |
|------------|-----------------------------------|----|----|---|-----|-----|-------|----------|
| GO:0015078 | proton transmembrane transpo      | MF | 9  | 1 | 562 | 32  | 19809 | 6.02E-01 |
| GO:0048863 | stem cell differentiation         | BP | 6  | 1 | 562 | 32  | 19809 | 6.02E-01 |
| GO:0034612 | response to tumor necrosis fac    | BP | 7  | 1 | 562 | 32  | 19809 | 6.02E-01 |
| GO:0046540 | U4/U6 x U5 tri-snRNP comple       | CC | 9  | 1 | 562 | 32  | 19809 | 6.02E-01 |
| GO:0045736 | negative regulation of cyclin-d   | BP | 13 | 1 | 562 | 32  | 19809 | 6.02E-01 |
| GO:0016239 | positive regulation of macroau    | BP | 10 | 1 | 562 | 32  | 19809 | 6.02E-01 |
| GO:0006361 | transcription initiation from RI  | BP | 9  | 1 | 562 | 32  | 19809 | 6.02E-01 |
| GO:0045907 | positive regulation of vasocon:   | BP | 10 | 1 | 562 | 32  | 19809 | 6.02E-01 |
| GO:0097192 | extrinsic apoptotic signaling pa  | BP | 6  | 1 | 562 | 32  | 19809 | 6.02E-01 |
| GO:0043552 | positive regulation of phosphat   | BP | 10 | 1 | 562 | 32  | 19809 | 6.02E-01 |
| GO:0071108 | protein K48-linked deubiquitir    | BP | 10 | 1 | 562 | 32  | 19809 | 6.02E-01 |
| GO:0016788 | hydrolase activity, acting on es  | MF | 5  | 1 | 562 | 32  | 19809 | 6.02E-01 |
| GO:0008089 | anterograde axonal transport      | BP | 11 | 1 | 562 | 32  | 19809 | 6.02E-01 |
| GO:0004993 | G protein-coupled serotonin re    | MF | 8  | 1 | 562 | 32  | 19809 | 6.02E-01 |
| GO:0044344 | cellular response to fibroblast ; | BP | 8  | 1 | 562 | 32  | 19809 | 6.02E-01 |
| GO:0000123 | histone acetyltransferase comp    | CC | 6  | 1 | 562 | 32  | 19809 | 6.02E-01 |
| GO:0032480 | negative regulation of type I in  | BP | 8  | 1 | 562 | 32  | 19809 | 6.02E-01 |
| GO:0030117 | membrane coat                     | CC | 6  | 1 | 562 | 32  | 19809 | 6.02E-01 |
| GO:0016616 | oxidoreductase activity, acting   | MF | 6  | 1 | 562 | 32  | 19809 | 6.02E-01 |
| GO:0030670 | phagocytic vesicle membrane       | CC | 8  | 2 | 562 | 71  | 19809 | 6.02E-01 |
| GO:0043154 | negative regulation of cysteine   | BP | 10 | 2 | 562 | 71  | 19809 | 6.02E-01 |
| GO:0006464 | cellular protein modification p   | BP | 8  | 3 | 562 | 110 | 19809 | 6.07E-01 |
| GO:0010506 | regulation of autophagy           | BP | 8  | 2 | 562 | 72  | 19809 | 6.10E-01 |
| GO:0032436 | positive regulation of proteaso   | BP | 12 | 2 | 562 | 72  | 19809 | 6.10E-01 |
| GO:0005251 | delayed rectifier potassium cha   | MF | 10 | 1 | 562 | 33  | 19809 | 6.13E-01 |
| GO:0048678 | response to axon injury           | BP | 6  | 1 | 562 | 33  | 19809 | 6.13E-01 |
| GO:0030073 | insulin secretion                 | BP | 11 | 1 | 562 | 33  | 19809 | 6.13E-01 |
| GO:0030513 | positive regulation of BMP sig    | BP | 11 | 1 | 562 | 33  | 19809 | 6.13E-01 |
| GO:0071949 | FAD binding                       | MF | 7  | 1 | 562 | 33  | 19809 | 6.13E-01 |
| GO:0008625 | extrinsic apoptotic signaling pa  | BP | 7  | 1 | 562 | 33  | 19809 | 6.13E-01 |
| GO:0043967 | histone H4 acetylation            | BP | 11 | 1 | 562 | 33  | 19809 | 6.13E-01 |
| GO:0006370 | 7-methylguanosine mRNA cap        | BP | 11 | 1 | 562 | 33  | 19809 | 6.13E-01 |
| GO:0018279 | protein N-linked glycosylation    | BP | 11 | 1 | 562 | 33  | 19809 | 6.13E-01 |
| GO:0070059 | intrinsic apoptotic signaling pa  | BP | 7  | 1 | 562 | 33  | 19809 | 6.13E-01 |
| GO:0045815 | positive regulation of gene exp   | BP | 9  | 1 | 562 | 33  | 19809 | 6.13E-01 |
| GO:0006904 | vesicle docking involved in ex    | BP | 7  | 1 | 562 | 33  | 19809 | 6.13E-01 |
| GO:0033574 | response to testosterone          | BP | 6  | 1 | 562 | 33  | 19809 | 6.13E-01 |
| GO:0032839 | dendrite cytoplasm                | CC | 9  | 1 | 562 | 33  | 19809 | 6.13E-01 |
| GO:0043928 | exonucleolytic nuclear-transcr    | BP | 13 | 1 | 562 | 33  | 19809 | 6.13E-01 |
| GO:0007264 | small GTPase mediated signal      | BP | 6  | 3 | 562 | 111 | 19809 | 6.14E-01 |
| GO:0070268 | cornification                     | BP | 6  | 3 | 562 | 111 | 19809 | 6.14E-01 |
| GO:0043197 | dendritic spine                   | CC | 7  | 4 | 562 | 149 | 19809 | 6.14E-01 |
| GO:0042391 | regulation of membrane potent     | BP | 5  | 3 | 562 | 112 | 19809 | 6.20E-01 |
| GO:0004721 | phosphoprotein phosphatase ac     | MF | 8  | 4 | 562 | 151 | 19809 | 6.24E-01 |
| GO:0008236 | serine-type peptidase activity    | MF | 6  | 4 | 562 | 151 | 19809 | 6.24E-01 |
| GO:0032148 | activation of protein kinase B ;  | BP | 13 | 1 | 562 | 34  | 19809 | 6.24E-01 |
| GO:0032212 | positive regulation of telomere   | BP | 12 | 1 | 562 | 34  | 19809 | 6.24E-01 |
| GO:0070830 | bicellular tight junction assembl | BP | 9  | 1 | 562 | 34  | 19809 | 6.24E-01 |
| GO:0003281 | ventricular septum developme      | BP | 6  | 1 | 562 | 34  | 19809 | 6.24E-01 |
| GO:0030594 | neurotransmitter receptor activ   | MF | 5  | 1 | 562 | 34  | 19809 | 6.24E-01 |

|            |                                  |    |    |    |     |      |       |          |
|------------|----------------------------------|----|----|----|-----|------|-------|----------|
| GO:1903671 | negative regulation of sproutin  | BP | 9  | 1  | 562 | 34   | 19809 | 6.24E-01 |
| GO:0002027 | regulation of heart rate         | BP | 9  | 1  | 562 | 34   | 19809 | 6.24E-01 |
| GO:0006479 | protein methylation              | BP | 10 | 1  | 562 | 34   | 19809 | 6.24E-01 |
| GO:0000077 | DNA damage checkpoint            | BP | 7  | 1  | 562 | 34   | 19809 | 6.24E-01 |
| GO:0098686 | hippocampal mossy fiber to C.    | CC | 5  | 1  | 562 | 34   | 19809 | 6.24E-01 |
| GO:0007616 | long-term memory                 | BP | 6  | 1  | 562 | 34   | 19809 | 6.24E-01 |
| GO:0030879 | mammary gland development        | BP | 7  | 1  | 562 | 34   | 19809 | 6.24E-01 |
| GO:0007281 | germ cell development            | BP | 5  | 1  | 562 | 34   | 19809 | 6.24E-01 |
| GO:0030855 | epithelial cell differentiation  | BP | 6  | 2  | 562 | 74   | 19809 | 6.25E-01 |
| GO:0002479 | antigen processing and present   | BP | 8  | 2  | 562 | 74   | 19809 | 6.25E-01 |
| GO:0045444 | fat cell differentiation         | BP | 6  | 2  | 562 | 74   | 19809 | 6.25E-01 |
| GO:0003677 | DNA binding                      | MF | 6  | 63 | 562 | 2294 | 19809 | 6.30E-01 |
| GO:0070373 | negative regulation of ERK1 a    | BP | 12 | 2  | 562 | 75   | 19809 | 6.32E-01 |
| GO:0045727 | positive regulation of translati | BP | 10 | 2  | 562 | 75   | 19809 | 6.32E-01 |
| GO:0006661 | phosphatidylinositol biosynthe   | BP | 10 | 2  | 562 | 75   | 19809 | 6.32E-01 |
| GO:0051291 | protein heterooligomerization    | BP | 8  | 2  | 562 | 75   | 19809 | 6.32E-01 |
| GO:0006811 | ion transport                    | BP | 6  | 18 | 562 | 672  | 19809 | 6.33E-01 |
| GO:0019731 | antibacterial humoral response   | BP | 7  | 1  | 562 | 35   | 19809 | 6.35E-01 |
| GO:0030521 | androgen receptor signaling pa   | BP | 7  | 1  | 562 | 35   | 19809 | 6.35E-01 |
| GO:0005875 | microtubule associated comple    | CC | 4  | 1  | 562 | 35   | 19809 | 6.35E-01 |
| GO:0005319 | lipid transporter activity       | MF | 4  | 1  | 562 | 35   | 19809 | 6.35E-01 |
| GO:0098656 | anion transmembrane transpor     | BP | 8  | 1  | 562 | 35   | 19809 | 6.35E-01 |
| GO:0042169 | SH2 domain binding               | MF | 6  | 1  | 562 | 35   | 19809 | 6.35E-01 |
| GO:0000118 | histone deacetylase complex      | CC | 7  | 1  | 562 | 35   | 19809 | 6.35E-01 |
| GO:0048568 | embryonic organ development      | BP | 6  | 1  | 562 | 35   | 19809 | 6.35E-01 |
| GO:0046627 | negative regulation of insulin r | BP | 9  | 1  | 562 | 35   | 19809 | 6.35E-01 |
| GO:0071479 | cellular response to ionizing ra | BP | 7  | 1  | 562 | 35   | 19809 | 6.35E-01 |
| GO:0006099 | tricarboxylic acid cycle         | BP | 5  | 1  | 562 | 35   | 19809 | 6.35E-01 |
| GO:0031305 | integral component of mitocho    | CC | 8  | 1  | 562 | 35   | 19809 | 6.35E-01 |
| GO:0006259 | DNA metabolic process            | BP | 7  | 1  | 562 | 35   | 19809 | 6.35E-01 |
| GO:0033017 | sarcoplasmic reticulum membr     | CC | 6  | 1  | 562 | 35   | 19809 | 6.35E-01 |
| GO:0016358 | dendrite development             | BP | 8  | 1  | 562 | 35   | 19809 | 6.35E-01 |
| GO:0004860 | protein kinase inhibitor activit | MF | 7  | 1  | 562 | 35   | 19809 | 6.35E-01 |
| GO:0006897 | endocytosis                      | BP | 7  | 5  | 562 | 193  | 19809 | 6.43E-01 |
| GO:0009653 | anatomical structure morphoge    | BP | 4  | 3  | 562 | 116  | 19809 | 6.43E-01 |
| GO:0015171 | amino acid transmembrane tra     | MF | 7  | 1  | 562 | 36   | 19809 | 6.46E-01 |
| GO:0006641 | triglyceride metabolic process   | BP | 9  | 1  | 562 | 36   | 19809 | 6.46E-01 |
| GO:0048477 | oogenesis                        | BP | 6  | 1  | 562 | 36   | 19809 | 6.46E-01 |
| GO:2000272 | negative regulation of signalin  | BP | 9  | 1  | 562 | 36   | 19809 | 6.46E-01 |
| GO:0043198 | dendritic shaft                  | CC | 5  | 1  | 562 | 36   | 19809 | 6.46E-01 |
| GO:0050772 | positive regulation of axonoge   | BP | 10 | 1  | 562 | 36   | 19809 | 6.46E-01 |
| GO:0030010 | establishment of cell polarity   | BP | 5  | 1  | 562 | 36   | 19809 | 6.46E-01 |
| GO:0033572 | transferrin transport            | BP | 11 | 1  | 562 | 36   | 19809 | 6.46E-01 |
| GO:0042026 | protein refolding                | BP | 5  | 1  | 562 | 36   | 19809 | 6.46E-01 |
| GO:0007093 | mitotic cell cycle checkpoint    | BP | 5  | 1  | 562 | 36   | 19809 | 6.46E-01 |
| GO:0001540 | amyloid-beta binding             | MF | 6  | 2  | 562 | 77   | 19809 | 6.46E-01 |
| GO:0003777 | microtubule motor activity       | MF | 10 | 2  | 562 | 77   | 19809 | 6.46E-01 |
| GO:0005216 | ion channel activity             | MF | 6  | 5  | 562 | 194  | 19809 | 6.48E-01 |
| GO:0003730 | mRNA 3'-UTR binding              | MF | 8  | 2  | 562 | 78   | 19809 | 6.53E-01 |
| GO:0051259 | protein complex oligomerizati    | BP | 7  | 2  | 562 | 78   | 19809 | 6.53E-01 |



|            |                                   |    |    |    |     |     |       |          |
|------------|-----------------------------------|----|----|----|-----|-----|-------|----------|
| GO:0005623 | cell                              | CC | 3  | 6  | 562 | 234 | 19809 | 6.55E-01 |
| GO:0030177 | positive regulation of Wnt sig    | BP | 9  | 1  | 562 | 37  | 19809 | 6.56E-01 |
| GO:0048786 | presynaptic active zone           | CC | 4  | 1  | 562 | 37  | 19809 | 6.56E-01 |
| GO:0007588 | excretion                         | BP | 5  | 1  | 562 | 37  | 19809 | 6.56E-01 |
| GO:0042476 | odontogenesis                     | BP | 6  | 1  | 562 | 37  | 19809 | 6.56E-01 |
| GO:0001654 | eye development                   | BP | 7  | 1  | 562 | 37  | 19809 | 6.56E-01 |
| GO:0048286 | lung alveolus development         | BP | 5  | 1  | 562 | 37  | 19809 | 6.56E-01 |
| GO:0032991 | protein-containing complex        | CC | 3  | 18 | 562 | 682 | 19809 | 6.57E-01 |
| GO:0005764 | lysosome                          | CC | 8  | 10 | 562 | 386 | 19809 | 6.59E-01 |
| GO:0005811 | lipid droplet                     | CC | 6  | 2  | 562 | 79  | 19809 | 6.60E-01 |
| GO:0006096 | glycolytic process                | BP | 10 | 1  | 562 | 38  | 19809 | 6.65E-01 |
| GO:0031463 | Cul3-RING ubiquitin ligase co     | CC | 7  | 1  | 562 | 38  | 19809 | 6.65E-01 |
| GO:0055088 | lipid homeostasis                 | BP | 7  | 1  | 562 | 38  | 19809 | 6.65E-01 |
| GO:0017112 | Rab guanyl-nucleotide exchan      | MF | 9  | 1  | 562 | 38  | 19809 | 6.65E-01 |
| GO:0006024 | glycosaminoglycan biosynthet      | BP | 8  | 1  | 562 | 38  | 19809 | 6.65E-01 |
| GO:0060045 | positive regulation of cardiac r  | BP | 8  | 1  | 562 | 38  | 19809 | 6.65E-01 |
| GO:0051287 | NAD binding                       | MF | 6  | 1  | 562 | 38  | 19809 | 6.65E-01 |
| GO:1990090 | cellular response to nerve grov   | BP | 8  | 1  | 562 | 38  | 19809 | 6.65E-01 |
| GO:0086091 | regulation of heart rate by card  | BP | 10 | 1  | 562 | 38  | 19809 | 6.65E-01 |
| GO:0006469 | negative regulation of protein l  | BP | 11 | 2  | 562 | 80  | 19809 | 6.67E-01 |
| GO:0000209 | protein polyubiquitination        | BP | 12 | 6  | 562 | 237 | 19809 | 6.67E-01 |
| GO:0030308 | negative regulation of cell grov  | BP | 7  | 3  | 562 | 121 | 19809 | 6.71E-01 |
| GO:0042734 | presynaptic membrane              | CC | 5  | 2  | 562 | 81  | 19809 | 6.74E-01 |
| GO:0006606 | protein import into nucleus       | BP | 11 | 2  | 562 | 81  | 19809 | 6.74E-01 |
| GO:0007040 | lysosome organization             | BP | 8  | 1  | 562 | 39  | 19809 | 6.75E-01 |
| GO:0007257 | activation of JUN kinase activi   | BP | 14 | 1  | 562 | 39  | 19809 | 6.75E-01 |
| GO:0004180 | carboxypeptidase activity         | MF | 8  | 1  | 562 | 39  | 19809 | 6.75E-01 |
| GO:1904315 | transmitter-gated ion channel a   | MF | 10 | 1  | 562 | 39  | 19809 | 6.75E-01 |
| GO:0048813 | dendrite morphogenesis            | BP | 9  | 1  | 562 | 39  | 19809 | 6.75E-01 |
| GO:0043537 | negative regulation of blood ve   | BP | 11 | 1  | 562 | 39  | 19809 | 6.75E-01 |
| GO:0032266 | phosphatidylinositol-3-phosph     | MF | 8  | 1  | 562 | 39  | 19809 | 6.75E-01 |
| GO:0008094 | DNA-dependent ATPase activ        | MF | 11 | 1  | 562 | 39  | 19809 | 6.75E-01 |
| GO:0042307 | positive regulation of protein i  | BP | 10 | 1  | 562 | 39  | 19809 | 6.75E-01 |
| GO:0061098 | positive regulation of protein t  | BP | 12 | 1  | 562 | 39  | 19809 | 6.75E-01 |
| GO:1904706 | negative regulation of vascular   | BP | 9  | 1  | 562 | 39  | 19809 | 6.75E-01 |
| GO:0006687 | glycosphingolipid metabolic p     | BP | 9  | 1  | 562 | 39  | 19809 | 6.75E-01 |
| GO:0009409 | response to cold                  | BP | 5  | 1  | 562 | 39  | 19809 | 6.75E-01 |
| GO:0010468 | regulation of gene expression     | BP | 7  | 6  | 562 | 240 | 19809 | 6.79E-01 |
| GO:0007613 | memory                            | BP | 5  | 2  | 562 | 82  | 19809 | 6.80E-01 |
| GO:0006910 | phagocytosis, recognition         | BP | 5  | 2  | 562 | 82  | 19809 | 6.80E-01 |
| GO:0008150 | biological_process                | BP | 2  | 15 | 562 | 581 | 19809 | 6.82E-01 |
| GO:0035735 | intraciliary transport involved   | BP | 8  | 1  | 562 | 40  | 19809 | 6.84E-01 |
| GO:0007017 | microtubule-based process         | BP | 4  | 1  | 562 | 40  | 19809 | 6.84E-01 |
| GO:0016575 | histone deacetylation             | BP | 11 | 1  | 562 | 40  | 19809 | 6.84E-01 |
| GO:0031640 | killing of cells of other organis | BP | 4  | 1  | 562 | 40  | 19809 | 6.84E-01 |
| GO:0001784 | phosphotyrosine residue bindin    | MF | 7  | 1  | 562 | 40  | 19809 | 6.84E-01 |
| GO:0007032 | endosome organization             | BP | 7  | 1  | 562 | 40  | 19809 | 6.84E-01 |
| GO:0005267 | potassium channel activity        | MF | 8  | 2  | 562 | 83  | 19809 | 6.87E-01 |
| GO:0030307 | positive regulation of cell grov  | BP | 7  | 2  | 562 | 83  | 19809 | 6.87E-01 |
| GO:0016042 | lipid catabolic process           | BP | 6  | 3  | 562 | 124 | 19809 | 6.87E-01 |

|            |                                  |    |    |   |     |     |       |          |
|------------|----------------------------------|----|----|---|-----|-----|-------|----------|
| GO:0006260 | DNA replication                  | BP | 8  | 4 | 562 | 165 | 19809 | 6.92E-01 |
| GO:0000932 | P-body                           | CC | 8  | 2 | 562 | 84  | 19809 | 6.93E-01 |
| GO:0071277 | cellular response to calcium io  | BP | 8  | 2 | 562 | 84  | 19809 | 6.93E-01 |
| GO:0030276 | clathrin binding                 | MF | 5  | 1 | 562 | 41  | 19809 | 6.93E-01 |
| GO:0006749 | glutathione metabolic process    | BP | 8  | 1 | 562 | 41  | 19809 | 6.93E-01 |
| GO:0070317 | negative regulation of G0 to G   | BP | 9  | 1 | 562 | 41  | 19809 | 6.93E-01 |
| GO:0043407 | negative regulation of MAP ki    | BP | 12 | 1 | 562 | 41  | 19809 | 6.93E-01 |
| GO:0030286 | dynein complex                   | CC | 5  | 1 | 562 | 41  | 19809 | 6.93E-01 |
| GO:0030018 | Z disc                           | CC | 5  | 3 | 562 | 126 | 19809 | 6.98E-01 |
| GO:0005923 | bicellular tight junction        | CC | 6  | 3 | 562 | 126 | 19809 | 6.98E-01 |
| GO:0016779 | nucleotidyltransferase activity  | MF | 6  | 2 | 562 | 85  | 19809 | 6.99E-01 |
| GO:0007059 | chromosome segregation           | BP | 4  | 2 | 562 | 85  | 19809 | 6.99E-01 |
| GO:0042220 | response to cocaine              | BP | 6  | 1 | 562 | 42  | 19809 | 7.02E-01 |
| GO:0050909 | sensory perception of taste      | BP | 8  | 1 | 562 | 42  | 19809 | 7.02E-01 |
| GO:0030331 | estrogen receptor binding        | MF | 9  | 1 | 562 | 42  | 19809 | 7.02E-01 |
| GO:0035097 | histone methyltransferase com    | CC | 6  | 1 | 562 | 42  | 19809 | 7.02E-01 |
| GO:0032391 | photoreceptor connecting cilium  | CC | 6  | 1 | 562 | 42  | 19809 | 7.02E-01 |
| GO:0006654 | phosphatidic acid biosynthetic   | BP | 10 | 1 | 562 | 42  | 19809 | 7.02E-01 |
| GO:0007098 | centrosome cycle                 | BP | 5  | 1 | 562 | 42  | 19809 | 7.02E-01 |
| GO:0045214 | sarcomere organization           | BP | 9  | 1 | 562 | 42  | 19809 | 7.02E-01 |
| GO:0051539 | 4 iron, 4 sulfur cluster binding | MF | 6  | 1 | 562 | 42  | 19809 | 7.02E-01 |
| GO:0003713 | transcription coactivator activi | MF | 5  | 7 | 562 | 285 | 19809 | 7.02E-01 |
| GO:0044325 | ion channel binding              | MF | 5  | 3 | 562 | 127 | 19809 | 7.03E-01 |
| GO:0046330 | positive regulation of JNK cas   | BP | 13 | 2 | 562 | 86  | 19809 | 7.05E-01 |
| GO:0006956 | complement activation            | BP | 5  | 2 | 562 | 86  | 19809 | 7.05E-01 |
| GO:0014070 | response to organic cyclic com   | BP | 6  | 3 | 562 | 128 | 19809 | 7.08E-01 |
| GO:0019894 | kinesin binding                  | MF | 6  | 1 | 562 | 43  | 19809 | 7.10E-01 |
| GO:0005245 | voltage-gated calcium channel    | MF | 9  | 1 | 562 | 43  | 19809 | 7.10E-01 |
| GO:0034332 | adherens junction organization   | BP | 6  | 1 | 562 | 43  | 19809 | 7.10E-01 |
| GO:0016235 | aggresome                        | CC | 6  | 1 | 562 | 43  | 19809 | 7.10E-01 |
| GO:0003899 | DNA-directed 5'-3' RNA polyr     | MF | 9  | 1 | 562 | 43  | 19809 | 7.10E-01 |
| GO:0016798 | hydrolase activity, acting on gl | MF | 5  | 2 | 562 | 87  | 19809 | 7.11E-01 |
| GO:0032580 | Golgi cisterna membrane          | CC | 8  | 2 | 562 | 87  | 19809 | 7.11E-01 |
| GO:0034220 | ion transmembrane transport      | BP | 7  | 7 | 562 | 289 | 19809 | 7.16E-01 |
| GO:0035264 | multicellular organism growth    | BP | 4  | 2 | 562 | 88  | 19809 | 7.17E-01 |
| GO:0004519 | endonuclease activity            | MF | 7  | 2 | 562 | 88  | 19809 | 7.17E-01 |
| GO:0001658 | branching involved in ureteric   | BP | 7  | 1 | 562 | 44  | 19809 | 7.19E-01 |
| GO:0007043 | cell-cell junction assembly      | BP | 7  | 1 | 562 | 44  | 19809 | 7.19E-01 |
| GO:0006665 | sphingolipid metabolic process   | BP | 8  | 1 | 562 | 44  | 19809 | 7.19E-01 |
| GO:0071005 | U2-type precatalytic spliceoso   | CC | 8  | 1 | 562 | 44  | 19809 | 7.19E-01 |
| GO:0050681 | androgen receptor binding        | MF | 9  | 1 | 562 | 44  | 19809 | 7.19E-01 |
| GO:0042645 | mitochondrial nucleoid           | CC | 4  | 1 | 562 | 44  | 19809 | 7.19E-01 |
| GO:0006814 | sodium ion transport             | BP | 9  | 3 | 562 | 131 | 19809 | 7.22E-01 |
| GO:0008333 | endosome to lysosome transpo     | BP | 8  | 1 | 562 | 45  | 19809 | 7.27E-01 |
| GO:0030199 | collagen fibril organization     | BP | 7  | 1 | 562 | 45  | 19809 | 7.27E-01 |
| GO:0030658 | transport vesicle membrane       | CC | 7  | 1 | 562 | 45  | 19809 | 7.27E-01 |
| GO:0032024 | positive regulation of insulin s | BP | 11 | 1 | 562 | 45  | 19809 | 7.27E-01 |
| GO:0015914 | phospholipid transport           | BP | 8  | 1 | 562 | 45  | 19809 | 7.27E-01 |
| GO:0014823 | response to activity             | BP | 4  | 1 | 562 | 45  | 19809 | 7.27E-01 |
| GO:0048156 | tau protein binding              | MF | 6  | 1 | 562 | 45  | 19809 | 7.27E-01 |

|            |                                   |    |    |     |     |      |       |          |
|------------|-----------------------------------|----|----|-----|-----|------|-------|----------|
| GO:0090051 | negative regulation of cell mig   | BP | 12 | 1   | 562 | 45   | 19809 | 7.27E-01 |
| GO:0097542 | ciliary tip                       | CC | 5  | 1   | 562 | 45   | 19809 | 7.27E-01 |
| GO:0030315 | T-tubule                          | CC | 5  | 1   | 562 | 45   | 19809 | 7.27E-01 |
| GO:0005829 | cytosol                           | CC | 6  | 137 | 562 | 5029 | 19809 | 7.27E-01 |
| GO:0004715 | non-membrane spanning prote       | MF | 9  | 1   | 562 | 46   | 19809 | 7.34E-01 |
| GO:0001890 | placenta development              | BP | 6  | 1   | 562 | 46   | 19809 | 7.34E-01 |
| GO:0022627 | cytosolic small ribosomal subu    | CC | 8  | 1   | 562 | 46   | 19809 | 7.34E-01 |
| GO:0010212 | response to ionizing radiation    | BP | 6  | 1   | 562 | 46   | 19809 | 7.34E-01 |
| GO:0031100 | animal organ regeneration         | BP | 6  | 1   | 562 | 46   | 19809 | 7.34E-01 |
| GO:0005262 | calcium channel activity          | MF | 8  | 2   | 562 | 92   | 19809 | 7.40E-01 |
| GO:0032147 | activation of protein kinase act  | BP | 12 | 2   | 562 | 92   | 19809 | 7.40E-01 |
| GO:0001669 | acrosomal vesicle                 | CC | 9  | 2   | 562 | 92   | 19809 | 7.40E-01 |
| GO:0006605 | protein targeting                 | BP | 11 | 1   | 562 | 47   | 19809 | 7.42E-01 |
| GO:0120163 | negative regulation of cold-ind   | BP | 7  | 1   | 562 | 47   | 19809 | 7.42E-01 |
| GO:0030864 | cortical actin cytoskeleton       | CC | 8  | 1   | 562 | 47   | 19809 | 7.42E-01 |
| GO:0003727 | single-stranded RNA binding       | MF | 7  | 1   | 562 | 47   | 19809 | 7.42E-01 |
| GO:0004879 | nuclear receptor activity         | MF | 6  | 1   | 562 | 47   | 19809 | 7.42E-01 |
| GO:0043124 | negative regulation of I-kappal   | BP | 10 | 1   | 562 | 47   | 19809 | 7.42E-01 |
| GO:0051781 | positive regulation of cell divis | BP | 7  | 1   | 562 | 47   | 19809 | 7.42E-01 |
| GO:0004175 | endopeptidase activity            | MF | 7  | 2   | 562 | 93   | 19809 | 7.45E-01 |
| GO:1905515 | non-motile cilium assembly        | BP | 8  | 1   | 562 | 48   | 19809 | 7.49E-01 |
| GO:0000723 | telomere maintenance              | BP | 8  | 1   | 562 | 48   | 19809 | 7.49E-01 |
| GO:0071902 | positive regulation of protein s  | BP | 12 | 1   | 562 | 48   | 19809 | 7.49E-01 |
| GO:0006612 | protein targeting to membrane     | BP | 12 | 1   | 562 | 48   | 19809 | 7.49E-01 |
| GO:0031175 | neuron projection developmen      | BP | 7  | 3   | 562 | 138  | 19809 | 7.54E-01 |
| GO:0042127 | regulation of cell population p   | BP | 6  | 4   | 562 | 180  | 19809 | 7.55E-01 |
| GO:0019886 | antigen processing and present    | BP | 7  | 2   | 562 | 95   | 19809 | 7.56E-01 |
| GO:0061337 | cardiac conduction                | BP | 9  | 1   | 562 | 49   | 19809 | 7.56E-01 |
| GO:0050885 | neuromuscular process control     | BP | 7  | 1   | 562 | 49   | 19809 | 7.56E-01 |
| GO:0009411 | response to UV                    | BP | 7  | 1   | 562 | 49   | 19809 | 7.56E-01 |
| GO:0045747 | positive regulation of Notch si   | BP | 9  | 1   | 562 | 49   | 19809 | 7.56E-01 |
| GO:0008542 | visual learning                   | BP | 5  | 1   | 562 | 49   | 19809 | 7.56E-01 |
| GO:0045597 | positive regulation of cell diff  | BP | 7  | 1   | 562 | 49   | 19809 | 7.56E-01 |
| GO:0006508 | proteolysis                       | BP | 7  | 16  | 562 | 651  | 19809 | 7.57E-01 |
| GO:0005769 | early endosome                    | CC | 8  | 6   | 562 | 262  | 19809 | 7.57E-01 |
| GO:0055085 | transmembrane transport           | BP | 6  | 16  | 562 | 653  | 19809 | 7.61E-01 |
| GO:0034613 | cellular protein localization     | BP | 6  | 1   | 562 | 50   | 19809 | 7.63E-01 |
| GO:0010507 | negative regulation of autoph     | BP | 9  | 1   | 562 | 50   | 19809 | 7.63E-01 |
| GO:0005637 | nuclear inner membrane            | CC | 6  | 1   | 562 | 50   | 19809 | 7.63E-01 |
| GO:0075733 | intracellular transport of virus  | BP | 8  | 1   | 562 | 50   | 19809 | 7.63E-01 |
| GO:0008146 | sulfotransferase activity         | MF | 6  | 1   | 562 | 50   | 19809 | 7.63E-01 |
| GO:0001917 | photoreceptor inner segment       | CC | 5  | 1   | 562 | 50   | 19809 | 7.63E-01 |
| GO:0046854 | phosphatidylinositol phosphor     | BP | 10 | 1   | 562 | 50   | 19809 | 7.63E-01 |
| GO:0036297 | interstrand cross-link repair     | BP | 9  | 1   | 562 | 50   | 19809 | 7.63E-01 |
| GO:0000281 | mitotic cytokinesis               | BP | 7  | 1   | 562 | 51   | 19809 | 7.70E-01 |
| GO:0004527 | exonuclease activity              | MF | 7  | 1   | 562 | 51   | 19809 | 7.70E-01 |
| GO:0051603 | proteolysis involved in cellula   | BP | 8  | 1   | 562 | 51   | 19809 | 7.70E-01 |
| GO:0070498 | interleukin-1-mediated signalin   | BP | 7  | 2   | 562 | 98   | 19809 | 7.71E-01 |
| GO:0006911 | phagocytosis, engulfment          | BP | 8  | 2   | 562 | 98   | 19809 | 7.71E-01 |
| GO:0006958 | complement activation, classic    | BP | 6  | 3   | 562 | 142  | 19809 | 7.71E-01 |

|            |                                  |    |    |    |     |      |       |          |
|------------|----------------------------------|----|----|----|-----|------|-------|----------|
| GO:0045095 | keratin filament                 | CC | 8  | 2  | 562 | 99   | 19809 | 7.76E-01 |
| GO:0030163 | protein catabolic process        | BP | 7  | 1  | 562 | 52   | 19809 | 7.77E-01 |
| GO:0030178 | negative regulation of Wnt sig   | BP | 9  | 1  | 562 | 52   | 19809 | 7.77E-01 |
| GO:0032760 | positive regulation of tumor ne  | BP | 9  | 1  | 562 | 52   | 19809 | 7.77E-01 |
| GO:0005544 | calcium-dependent phospholip     | MF | 6  | 1  | 562 | 52   | 19809 | 7.77E-01 |
| GO:0009306 | protein secretion                | BP | 10 | 1  | 562 | 52   | 19809 | 7.77E-01 |
| GO:0019901 | protein kinase binding           | MF | 7  | 11 | 562 | 468  | 19809 | 7.78E-01 |
| GO:0005913 | cell-cell adherens junction      | CC | 5  | 2  | 562 | 100  | 19809 | 7.80E-01 |
| GO:0000980 | RNA polymerase II distal enha    | MF | 10 | 2  | 562 | 100  | 19809 | 7.80E-01 |
| GO:0005635 | nuclear envelope                 | CC | 6  | 4  | 562 | 187  | 19809 | 7.81E-01 |
| GO:0016887 | ATPase activity                  | MF | 9  | 5  | 562 | 229  | 19809 | 7.82E-01 |
| GO:0051290 | protein heterotetramerization    | BP | 9  | 1  | 562 | 53   | 19809 | 7.83E-01 |
| GO:0005881 | cytoplasmic microtubule          | CC | 8  | 1  | 562 | 53   | 19809 | 7.83E-01 |
| GO:0006888 | endoplasmic reticulum to Golg    | BP | 7  | 4  | 562 | 188  | 19809 | 7.84E-01 |
| GO:0030030 | cell projection organization     | BP | 5  | 4  | 562 | 188  | 19809 | 7.84E-01 |
| GO:0019904 | protein domain specific bindin   | MF | 5  | 6  | 562 | 271  | 19809 | 7.84E-01 |
| GO:1903508 | positive regulation of nucleic ε | BP | 10 | 2  | 562 | 101  | 19809 | 7.85E-01 |
| GO:0005975 | carbohydrate metabolic proces    | BP | 5  | 5  | 562 | 231  | 19809 | 7.88E-01 |
| GO:0001227 | DNA-binding transcription rep    | MF | 6  | 5  | 562 | 231  | 19809 | 7.88E-01 |
| GO:0003707 | steroid hormone receptor activ   | MF | 5  | 1  | 562 | 54   | 19809 | 7.89E-01 |
| GO:0048704 | embryonic skeletal system moi    | BP | 7  | 1  | 562 | 54   | 19809 | 7.89E-01 |
| GO:0042277 | peptide binding                  | MF | 5  | 1  | 562 | 54   | 19809 | 7.89E-01 |
| GO:0008152 | metabolic process                | BP | 3  | 4  | 562 | 190  | 19809 | 7.91E-01 |
| GO:0045814 | negative regulation of gene exj  | BP | 9  | 1  | 562 | 55   | 19809 | 7.95E-01 |
| GO:1904115 | axon cytoplasm                   | CC | 6  | 1  | 562 | 55   | 19809 | 7.95E-01 |
| GO:0043401 | steroid hormone mediated sign    | BP | 6  | 1  | 562 | 55   | 19809 | 7.95E-01 |
| GO:0005871 | kinesin complex                  | CC | 5  | 1  | 562 | 55   | 19809 | 7.95E-01 |
| GO:0043657 | host cell                        | CC | 5  | 1  | 562 | 55   | 19809 | 7.95E-01 |
| GO:0016459 | myosin complex                   | CC | 4  | 1  | 562 | 55   | 19809 | 7.95E-01 |
| GO:0003674 | MF                               | MF | 2  | 17 | 562 | 711  | 19809 | 7.98E-01 |
| GO:0005654 | nucleoplasm                      | CC | 6  | 84 | 562 | 3200 | 19809 | 8.01E-01 |
| GO:0048365 | Rac GTPase binding               | MF | 10 | 1  | 562 | 56   | 19809 | 8.01E-01 |
| GO:0030665 | clathrin-coated vesicle membra   | CC | 8  | 1  | 562 | 56   | 19809 | 8.01E-01 |
| GO:0045787 | positive regulation of cell cycl | BP | 7  | 1  | 562 | 56   | 19809 | 8.01E-01 |
| GO:0043022 | ribosome binding                 | MF | 6  | 1  | 562 | 56   | 19809 | 8.01E-01 |
| GO:0031492 | nucleosomal DNA binding          | MF | 8  | 1  | 562 | 56   | 19809 | 8.01E-01 |
| GO:0006366 | transcription by RNA polymer     | BP | 9  | 6  | 562 | 277  | 19809 | 8.01E-01 |
| GO:0043621 | protein self-association         | MF | 5  | 1  | 562 | 57   | 19809 | 8.07E-01 |
| GO:0030326 | embryonic limb morphogenesi      | BP | 7  | 1  | 562 | 57   | 19809 | 8.07E-01 |
| GO:0006338 | chromatin remodeling             | BP | 6  | 2  | 562 | 106  | 19809 | 8.07E-01 |
| GO:0006470 | protein dephosphorylation        | BP | 9  | 4  | 562 | 195  | 19809 | 8.07E-01 |
| GO:0031966 | mitochondrial membrane           | CC | 5  | 3  | 562 | 152  | 19809 | 8.09E-01 |
| GO:0030176 | integral component of endopla    | CC | 7  | 2  | 562 | 107  | 19809 | 8.11E-01 |
| GO:0008654 | phospholipid biosynthetic proc   | BP | 8  | 1  | 562 | 58   | 19809 | 8.12E-01 |
| GO:0000166 | nucleotide binding               | MF | 5  | 46 | 562 | 1817 | 19809 | 8.14E-01 |
| GO:0000045 | autophagosome assembly           | BP | 7  | 1  | 562 | 59   | 19809 | 8.17E-01 |
| GO:0019003 | GDP binding                      | MF | 8  | 1  | 562 | 59   | 19809 | 8.17E-01 |
| GO:0045860 | positive regulation of protein k | BP | 11 | 1  | 562 | 59   | 19809 | 8.17E-01 |
| GO:0005759 | mitochondrial matrix             | CC | 7  | 8  | 562 | 366  | 19809 | 8.19E-01 |
| GO:0008544 | epidermis development            | BP | 6  | 2  | 562 | 109  | 19809 | 8.19E-01 |

|            |                                            |    |    |    |     |      |       |          |
|------------|--------------------------------------------|----|----|----|-----|------|-------|----------|
| GO:0050853 | B cell receptor signaling pathw            | BP | 8  | 2  | 562 | 109  | 19809 | 8.19E-01 |
| GO:0001568 | blood vessel development                   | BP | 5  | 1  | 562 | 60   | 19809 | 8.23E-01 |
| GO:0016328 | lateral plasma membrane                    | CC | 5  | 1  | 562 | 60   | 19809 | 8.23E-01 |
| GO:0002223 | stimulatory C-type lectin recep            | BP | 8  | 2  | 562 | 110  | 19809 | 8.23E-01 |
| GO:0016740 | transferase activity                       | MF | 4  | 46 | 562 | 1826 | 19809 | 8.24E-01 |
| GO:0001570 | vasculogenesis                             | BP | 6  | 1  | 562 | 61   | 19809 | 8.28E-01 |
| GO:0030139 | endocytic vesicle                          | CC | 7  | 1  | 562 | 61   | 19809 | 8.28E-01 |
| GO:0000151 | ubiquitin ligase complex                   | CC | 5  | 2  | 562 | 112  | 19809 | 8.31E-01 |
| GO:0031072 | heat shock protein binding                 | MF | 5  | 1  | 562 | 62   | 19809 | 8.33E-01 |
| GO:0051898 | negative regulation of protein l           | BP | 10 | 1  | 562 | 62   | 19809 | 8.33E-01 |
| GO:0007601 | visual perception                          | BP | 8  | 4  | 562 | 204  | 19809 | 8.34E-01 |
| GO:0005819 | spindle                                    | CC | 6  | 4  | 562 | 204  | 19809 | 8.34E-01 |
| GO:0003774 | motor activity                             | MF | 9  | 2  | 562 | 113  | 19809 | 8.34E-01 |
| GO:0051536 | iron-sulfur cluster binding                | MF | 5  | 1  | 562 | 63   | 19809 | 8.37E-01 |
| GO:0007187 | G protein-coupled receptor sig             | BP | 6  | 1  | 562 | 63   | 19809 | 8.37E-01 |
| GO:0048666 | neuron development                         | BP | 6  | 1  | 562 | 63   | 19809 | 8.37E-01 |
| GO:0006694 | steroid biosynthetic process               | BP | 7  | 1  | 562 | 63   | 19809 | 8.37E-01 |
| GO:0045665 | negative regulation of neuron c            | BP | 10 | 1  | 562 | 63   | 19809 | 8.37E-01 |
| GO:0032259 | methylation                                | BP | 4  | 4  | 562 | 206  | 19809 | 8.40E-01 |
| GO:0004722 | protein serine/threonine phosph            | MF | 9  | 1  | 562 | 64   | 19809 | 8.42E-01 |
| GO:0031667 | response to nutrient levels                | BP | 6  | 1  | 562 | 64   | 19809 | 8.42E-01 |
| GO:0030433 | ubiquitin-dependent ERAD pa                | BP | 8  | 1  | 562 | 64   | 19809 | 8.42E-01 |
| GO:0007416 | synapse assembly                           | BP | 6  | 1  | 562 | 64   | 19809 | 8.42E-01 |
| GO:0005905 | clathrin-coated pit                        | CC | 4  | 1  | 562 | 64   | 19809 | 8.42E-01 |
| GO:0003682 | chromatin binding                          | MF | 4  | 9  | 562 | 418  | 19809 | 8.42E-01 |
| GO:0007268 | chemical synaptic transmissior             | BP | 9  | 5  | 562 | 251  | 19809 | 8.43E-01 |
| GO:0005765 | lysosomal membrane                         | CC | 9  | 6  | 562 | 294  | 19809 | 8.44E-01 |
| GO:0002250 | adaptive immune response                   | BP | 5  | 8  | 562 | 379  | 19809 | 8.46E-01 |
| GO:0003684 | damaged DNA binding                        | MF | 7  | 1  | 562 | 65   | 19809 | 8.46E-01 |
| GO:0050660 | flavin adenine dinucleotide bir            | MF | 6  | 1  | 562 | 65   | 19809 | 8.46E-01 |
| GO:0008217 | regulation of blood pressure               | BP | 5  | 1  | 562 | 65   | 19809 | 8.46E-01 |
| GO:0030017 | sarcomere                                  | CC | 5  | 1  | 562 | 65   | 19809 | 8.46E-01 |
| GO:0006281 | DNA repair                                 | BP | 8  | 8  | 562 | 380  | 19809 | 8.48E-01 |
| GO:0007283 | spermatogenesis                            | BP | 7  | 10 | 562 | 463  | 19809 | 8.50E-01 |
| GO:0043010 | camera-type eye development                | BP | 8  | 1  | 562 | 66   | 19809 | 8.51E-01 |
| GO:0002039 | p53 binding                                | MF | 5  | 1  | 562 | 66   | 19809 | 8.51E-01 |
| GO:0000381 | regulation of alternative mRN <sub>l</sub> | BP | 10 | 1  | 562 | 66   | 19809 | 8.51E-01 |
| GO:0008233 | peptidase activity                         | MF | 5  | 12 | 562 | 545  | 19809 | 8.51E-01 |
| GO:0051321 | meiotic cell cycle                         | BP | 5  | 2  | 562 | 118  | 19809 | 8.52E-01 |
| GO:0005789 | endoplasmic reticulum membr                | CC | 5  | 23 | 562 | 979  | 19809 | 8.52E-01 |
| GO:0003729 | mRNA binding                               | MF | 7  | 3  | 562 | 166  | 19809 | 8.54E-01 |
| GO:0010977 | negative regulation of neuron i            | BP | 11 | 1  | 562 | 67   | 19809 | 8.55E-01 |
| GO:0000149 | SNARE binding                              | MF | 5  | 1  | 562 | 67   | 19809 | 8.55E-01 |
| GO:0005249 | voltage-gated potassium chann              | MF | 9  | 1  | 562 | 68   | 19809 | 8.59E-01 |
| GO:0006887 | exocytosis                                 | BP | 7  | 2  | 562 | 121  | 19809 | 8.62E-01 |
| GO:0022857 | transmembrane transporter act              | MF | 4  | 3  | 562 | 170  | 19809 | 8.65E-01 |
| GO:0000784 | nuclear chromosome, telomeri               | CC | 8  | 2  | 562 | 122  | 19809 | 8.65E-01 |
| GO:0060041 | retina development in camera-              | BP | 5  | 1  | 562 | 70   | 19809 | 8.67E-01 |
| GO:0016241 | regulation of macroautophagy               | BP | 9  | 1  | 562 | 71   | 19809 | 8.71E-01 |
| GO:0045335 | phagocytic vesicle                         | CC | 8  | 1  | 562 | 71   | 19809 | 8.71E-01 |

|            |                                   |    |    |    |     |     |       |          |
|------------|-----------------------------------|----|----|----|-----|-----|-------|----------|
| GO:0032482 | Rab protein signal transduction   | BP | 8  | 1  | 562 | 71  | 19809 | 8.71E-01 |
| GO:0007265 | Ras protein signal transduction   | BP | 7  | 1  | 562 | 71  | 19809 | 8.71E-01 |
| GO:0061418 | regulation of transcription from  | BP | 11 | 1  | 562 | 72  | 19809 | 8.75E-01 |
| GO:0090575 | RNA polymerase II transcription   | CC | 6  | 1  | 562 | 72  | 19809 | 8.75E-01 |
| GO:0005546 | phosphatidylinositol-4,5-bisph    | MF | 9  | 1  | 562 | 72  | 19809 | 8.75E-01 |
| GO:0042393 | histone binding                   | MF | 5  | 2  | 562 | 126 | 19809 | 8.76E-01 |
| GO:0009749 | response to glucose               | BP | 9  | 1  | 562 | 73  | 19809 | 8.78E-01 |
| GO:0045732 | positive regulation of protein c  | BP | 8  | 1  | 562 | 73  | 19809 | 8.78E-01 |
| GO:0060548 | negative regulation of cell death | BP | 7  | 1  | 562 | 73  | 19809 | 8.78E-01 |
| GO:0036064 | ciliary basal body                | CC | 7  | 2  | 562 | 127 | 19809 | 8.79E-01 |
| GO:0004930 | G protein-coupled receptor act    | MF | 6  | 18 | 562 | 806 | 19809 | 8.80E-01 |
| GO:0000785 | chromatin                         | CC | 6  | 2  | 562 | 128 | 19809 | 8.82E-01 |
| GO:0038096 | Fc-gamma receptor signaling p     | BP | 8  | 2  | 562 | 128 | 19809 | 8.82E-01 |
| GO:0021987 | cerebral cortex development       | BP | 5  | 1  | 562 | 75  | 19809 | 8.85E-01 |
| GO:0072686 | mitotic spindle                   | CC | 7  | 1  | 562 | 75  | 19809 | 8.85E-01 |
| GO:0006644 | phospholipid metabolic proces     | BP | 7  | 1  | 562 | 75  | 19809 | 8.85E-01 |
| GO:0016567 | protein ubiquitination            | BP | 11 | 12 | 562 | 568 | 19809 | 8.86E-01 |
| GO:0043130 | ubiquitin binding                 | MF | 6  | 1  | 562 | 76  | 19809 | 8.88E-01 |
| GO:0000086 | G2/M transition of mitotic cell   | BP | 7  | 2  | 562 | 131 | 19809 | 8.90E-01 |
| GO:1901796 | regulation of signal transducti   | BP | 9  | 2  | 562 | 131 | 19809 | 8.90E-01 |
| GO:0051301 | cell division                     | BP | 4  | 8  | 562 | 404 | 19809 | 8.90E-01 |
| GO:0030216 | keratinocyte differentiation      | BP | 8  | 1  | 562 | 77  | 19809 | 8.91E-01 |
| GO:0004842 | ubiquitin-protein transferase a   | MF | 6  | 5  | 562 | 274 | 19809 | 8.92E-01 |
| GO:0005884 | actin filament                    | CC | 7  | 1  | 562 | 78  | 19809 | 8.95E-01 |
| GO:0050790 | regulation of catalytic activity  | BP | 5  | 1  | 562 | 78  | 19809 | 8.95E-01 |
| GO:0016705 | oxidoreductase activity, acting   | MF | 5  | 1  | 562 | 78  | 19809 | 8.95E-01 |
| GO:0001650 | fibrillar center                  | CC | 7  | 2  | 562 | 133 | 19809 | 8.95E-01 |
| GO:0045892 | negative regulation of transcrip  | BP | 9  | 12 | 562 | 577 | 19809 | 8.97E-01 |
| GO:0008543 | fibroblast growth factor recept   | BP | 8  | 1  | 562 | 79  | 19809 | 8.98E-01 |
| GO:0007338 | single fertilization              | BP | 5  | 1  | 562 | 79  | 19809 | 8.98E-01 |
| GO:0071260 | cellular response to mechanical   | BP | 6  | 1  | 562 | 79  | 19809 | 8.98E-01 |
| GO:0030672 | synaptic vesicle membrane         | CC | 4  | 1  | 562 | 79  | 19809 | 8.98E-01 |
| GO:0061024 | membrane organization             | BP | 5  | 2  | 562 | 135 | 19809 | 8.99E-01 |
| GO:0007018 | microtubule-based movement        | BP | 5  | 1  | 562 | 80  | 19809 | 9.00E-01 |
| GO:0005758 | mitochondrial intermembrane       | CC | 6  | 1  | 562 | 80  | 19809 | 9.00E-01 |
| GO:0000922 | spindle pole                      | CC | 6  | 2  | 562 | 138 | 19809 | 9.06E-01 |
| GO:0060964 | regulation of gene silencing by   | BP | 10 | 1  | 562 | 82  | 19809 | 9.06E-01 |
| GO:0008104 | protein localization              | BP | 5  | 1  | 562 | 82  | 19809 | 9.06E-01 |
| GO:0031647 | regulation of protein stability   | BP | 5  | 1  | 562 | 83  | 19809 | 9.09E-01 |
| GO:0008286 | insulin receptor signaling path   | BP | 8  | 1  | 562 | 83  | 19809 | 9.09E-01 |
| GO:0008168 | methyltransferase activity        | MF | 6  | 3  | 562 | 190 | 19809 | 9.09E-01 |
| GO:0072562 | blood microparticle               | CC | 4  | 2  | 562 | 140 | 19809 | 9.10E-01 |
| GO:0003712 | transcription coregulator activi  | MF | 4  | 1  | 562 | 84  | 19809 | 9.11E-01 |
| GO:0016874 | ligase activity                   | MF | 4  | 2  | 562 | 141 | 19809 | 9.12E-01 |
| GO:0030674 | protein binding, bridging         | MF | 5  | 1  | 562 | 85  | 19809 | 9.14E-01 |
| GO:0031625 | ubiquitin protein ligase bindin   | MF | 7  | 5  | 562 | 288 | 19809 | 9.14E-01 |
| GO:0050829 | defense response to Gram-neg      | BP | 9  | 1  | 562 | 86  | 19809 | 9.16E-01 |
| GO:0019903 | protein phosphatase binding       | MF | 7  | 1  | 562 | 87  | 19809 | 9.19E-01 |
| GO:0004497 | monooxygenase activity            | MF | 5  | 1  | 562 | 87  | 19809 | 9.19E-01 |
| GO:0008076 | voltage-gated potassium chann     | CC | 9  | 1  | 562 | 89  | 19809 | 9.23E-01 |

|            |                                  |    |    |     |     |      |       |          |
|------------|----------------------------------|----|----|-----|-----|------|-------|----------|
| GO:0006898 | receptor-mediated endocytosis    | BP | 8  | 3   | 562 | 199  | 19809 | 9.24E-01 |
| GO:0003714 | transcription corepressor activ  | MF | 5  | 4   | 562 | 248  | 19809 | 9.24E-01 |
| GO:0005739 | mitochondrion                    | CC | 6  | 35  | 562 | 1526 | 19809 | 9.24E-01 |
| GO:0035278 | miRNA mediated inhibition of     | BP | 12 | 1   | 562 | 91   | 19809 | 9.28E-01 |
| GO:0035578 | azurophil granule lumen          | CC | 8  | 1   | 562 | 91   | 19809 | 9.28E-01 |
| GO:0005694 | chromosome                       | CC | 6  | 9   | 562 | 477  | 19809 | 9.28E-01 |
| GO:0007049 | cell cycle                       | BP | 4  | 13  | 562 | 649  | 19809 | 9.29E-01 |
| GO:0005244 | voltage-gated ion channel activ  | MF | 9  | 2   | 562 | 150  | 19809 | 9.29E-01 |
| GO:0006805 | xenobiotic metabolic process     | BP | 5  | 1   | 562 | 93   | 19809 | 9.32E-01 |
| GO:0090630 | activation of GTPase activity    | BP | 9  | 1   | 562 | 94   | 19809 | 9.34E-01 |
| GO:0005930 | axoneme                          | CC | 6  | 1   | 562 | 94   | 19809 | 9.34E-01 |
| GO:0008203 | cholesterol metabolic process    | BP | 8  | 1   | 562 | 94   | 19809 | 9.34E-01 |
| GO:0042632 | cholesterol homeostasis          | BP | 9  | 1   | 562 | 96   | 19809 | 9.37E-01 |
| GO:0034765 | regulation of ion transmembra    | BP | 8  | 2   | 562 | 156  | 19809 | 9.38E-01 |
| GO:0006886 | intracellular protein transport  | BP | 10 | 6   | 562 | 354  | 19809 | 9.39E-01 |
| GO:0005681 | spliceosomal complex             | CC | 6  | 2   | 562 | 157  | 19809 | 9.40E-01 |
| GO:0008234 | cysteine-type peptidase activit  | MF | 7  | 2   | 562 | 158  | 19809 | 9.41E-01 |
| GO:1990904 | ribonucleoprotein complex        | CC | 4  | 2   | 562 | 160  | 19809 | 9.44E-01 |
| GO:0005200 | structural constituent of cytosk | MF | 4  | 1   | 562 | 100  | 19809 | 9.44E-01 |
| GO:0003823 | antigen binding                  | MF | 4  | 2   | 562 | 161  | 19809 | 9.45E-01 |
| GO:0006325 | chromatin organization           | BP | 5  | 6   | 562 | 362  | 19809 | 9.46E-01 |
| GO:0031090 | organelle membrane               | CC | 4  | 1   | 562 | 102  | 19809 | 9.47E-01 |
| GO:0006310 | DNA recombination                | BP | 8  | 1   | 562 | 102  | 19809 | 9.47E-01 |
| GO:0005575 | CC                               | CC | 2  | 7   | 562 | 411  | 19809 | 9.49E-01 |
| GO:0031982 | vesicle                          | CC | 5  | 2   | 562 | 164  | 19809 | 9.49E-01 |
| GO:0038095 | Fc-epsilon receptor signaling p  | BP | 8  | 2   | 562 | 166  | 19809 | 9.51E-01 |
| GO:0002377 | immunoglobulin production        | BP | 5  | 1   | 562 | 106  | 19809 | 9.53E-01 |
| GO:0061630 | ubiquitin protein ligase activit | MF | 7  | 3   | 562 | 222  | 19809 | 9.53E-01 |
| GO:0007015 | actin filament organization      | BP | 6  | 1   | 562 | 108  | 19809 | 9.56E-01 |
| GO:0004843 | thiol-dependent ubiquitin-spec   | MF | 10 | 1   | 562 | 112  | 19809 | 9.61E-01 |
| GO:0005815 | microtubule organizing center    | CC | 6  | 7   | 562 | 427  | 19809 | 9.61E-01 |
| GO:0005543 | phospholipid binding             | MF | 5  | 1   | 562 | 113  | 19809 | 9.62E-01 |
| GO:0036459 | thiol-dependent ubiquitinyl hy   | MF | 9  | 1   | 562 | 113  | 19809 | 9.62E-01 |
| GO:0043488 | regulation of mRNA stability     | BP | 10 | 1   | 562 | 114  | 19809 | 9.63E-01 |
| GO:0006367 | transcription initiation from Rl | BP | 9  | 2   | 562 | 178  | 19809 | 9.64E-01 |
| GO:0042593 | glucose homeostasis              | BP | 8  | 1   | 562 | 115  | 19809 | 9.64E-01 |
| GO:0000184 | nuclear-transcribed mRNA cat     | BP | 12 | 1   | 562 | 119  | 19809 | 9.68E-01 |
| GO:0008202 | steroid metabolic process        | BP | 6  | 1   | 562 | 126  | 19809 | 9.74E-01 |
| GO:0006974 | cellular response to DNA dam     | BP | 6  | 8   | 562 | 499  | 19809 | 9.74E-01 |
| GO:0005634 | nucleus                          | CC | 6  | 166 | 562 | 6586 | 19809 | 9.75E-01 |
| GO:0045296 | cadherin binding                 | MF | 6  | 4   | 562 | 306  | 19809 | 9.76E-01 |
| GO:0031424 | keratinization                   | BP | 4  | 2   | 562 | 198  | 19809 | 9.78E-01 |
| GO:0005882 | intermediate filament            | CC | 7  | 2   | 562 | 205  | 19809 | 9.81E-01 |
| GO:0005929 | cilium                           | CC | 4  | 5   | 562 | 373  | 19809 | 9.82E-01 |
| GO:0031514 | motile cilium                    | CC | 5  | 1   | 562 | 141  | 19809 | 9.83E-01 |
| GO:0005506 | iron ion binding                 | MF | 8  | 1   | 562 | 141  | 19809 | 9.83E-01 |
| GO:0016579 | protein deubiquitination         | BP | 9  | 3   | 562 | 269  | 19809 | 9.83E-01 |
| GO:0051726 | regulation of cell cycle         | BP | 6  | 1   | 562 | 149  | 19809 | 9.86E-01 |
| GO:0016607 | nuclear speck                    | CC | 8  | 5   | 562 | 397  | 19809 | 9.89E-01 |
| GO:0030496 | midbody                          | CC | 4  | 1   | 562 | 157  | 19809 | 9.89E-01 |

|            |                                  |    |    |    |     |      |       |          |
|------------|----------------------------------|----|----|----|-----|------|-------|----------|
| GO:0016604 | nuclear body                     | CC | 7  | 3  | 562 | 289  | 19809 | 9.89E-01 |
| GO:0005730 | nucleolus                        | CC | 6  | 14 | 562 | 834  | 19809 | 9.90E-01 |
| GO:0005938 | cell cortex                      | CC | 7  | 1  | 562 | 161  | 19809 | 9.90E-01 |
| GO:0015031 | protein transport                | BP | 9  | 10 | 562 | 657  | 19809 | 9.91E-01 |
| GO:0000398 | mRNA splicing, via spliceosor    | BP | 13 | 2  | 562 | 237  | 19809 | 9.92E-01 |
| GO:0003735 | structural constituent of riboso | MF | 4  | 1  | 562 | 170  | 19809 | 9.93E-01 |
| GO:0003723 | RNA binding                      | MF | 6  | 29 | 562 | 1525 | 19809 | 9.94E-01 |
| GO:0005743 | mitochondrial inner membrane     | CC | 6  | 5  | 562 | 442  | 19809 | 9.96E-01 |
| GO:0043161 | proteasome-mediated ubiquitir    | BP | 11 | 1  | 562 | 189  | 19809 | 9.96E-01 |
| GO:0005840 | ribosome                         | CC | 6  | 1  | 562 | 205  | 19809 | 9.97E-01 |
| GO:0006511 | ubiquitin-dependent protein ca   | BP | 10 | 2  | 562 | 314  | 19809 | 9.99E-01 |
| GO:0006412 | translation                      | BP | 8  | 2  | 562 | 318  | 19809 | 9.99E-01 |
| GO:0005813 | centrosome                       | CC | 7  | 4  | 562 | 485  | 19809 | 1.00E+00 |
| GO:0016192 | vesicle-mediated transport       | BP | 6  | 1  | 562 | 278  | 19809 | 1.00E+00 |
| GO:0008380 | RNA splicing                     | BP | 10 | 1  | 562 | 291  | 19809 | 1.00E+00 |
| GO:0006397 | mRNA processing                  | BP | 10 | 2  | 562 | 379  | 19809 | 1.00E+00 |
| GO:0050896 | response to stimulus             | BP | 3  | 1  | 562 | 569  | 19809 | 1.00E+00 |



**Supplementary Table 5. KEGG enrichment analysis of differentially expressed genes.**

| pathway_id | pathway_name                                  | S.gene.n<br>umber | TS.gene.<br>number | B.gene.n<br>umber | TB.gene.<br>number | pvalue   |
|------------|-----------------------------------------------|-------------------|--------------------|-------------------|--------------------|----------|
| ko04640    | Hematopoietic cell lineage                    | 15                | 259                | 94                | 7612               | 5.29E-07 |
| ko04060    | Cytokine-cytokine receptor interaction        | 24                | 259                | 292               | 7612               | 5.16E-05 |
| ko04350    | TGF-beta signaling pathway                    | 10                | 259                | 91                | 7612               | 9.91E-04 |
| ko04512    | ECM-receptor interaction                      | 8                 | 259                | 82                | 7612               | 6.53E-03 |
| ko05418    | Fluid shear stress and atherosclerosis        | 11                | 259                | 137               | 7612               | 6.87E-03 |
| ko04371    | Apelin signaling pathway                      | 11                | 259                | 137               | 7612               | 6.87E-03 |
| ko04978    | Mineral absorption                            | 6                 | 259                | 51                | 7612               | 7.30E-03 |
| ko04510    | Focal adhesion                                | 14                | 259                | 199               | 7612               | 7.82E-03 |
| ko04151    | PI3K-Akt signaling pathway                    | 21                | 259                | 353               | 7612               | 8.79E-03 |
| ko04380    | Osteoclast differentiation                    | 10                | 259                | 125               | 7612               | 1.00E-02 |
| ko05310    | Asthma                                        | 4                 | 259                | 28                | 7612               | 1.41E-02 |
| ko00512    | Mucin type O-glycan biosynthesis              | 4                 | 259                | 31                | 7612               | 2.00E-02 |
| ko00052    | Galactose metabolism                          | 4                 | 259                | 31                | 7612               | 2.00E-02 |
| ko04750    | Inflammatory mediator regulation of TRP cha   | 8                 | 259                | 100               | 7612               | 2.03E-02 |
| ko05144    | Malaria                                       | 5                 | 259                | 48                | 7612               | 2.28E-02 |
| ko00770    | Pantothenate and CoA biosynthesis             | 3                 | 259                | 19                | 7612               | 2.52E-02 |
| ko04062    | Chemokine signaling pathway                   | 12                | 259                | 188               | 7612               | 2.65E-02 |
| ko00740    | Riboflavin metabolism                         | 2                 | 259                | 8                 | 7612               | 2.82E-02 |
| ko05323    | Rheumatoid arthritis                          | 7                 | 259                | 87                | 7612               | 2.82E-02 |
| ko04145    | Phagosome                                     | 10                | 259                | 148               | 7612               | 2.92E-02 |
| ko05206    | MicroRNAs in cancer                           | 10                | 259                | 150               | 7612               | 3.17E-02 |
| ko05166    | Human T-cell leukemia virus 1 infection       | 13                | 259                | 217               | 7612               | 3.37E-02 |
| ko05146    | Amoebiasis                                    | 7                 | 259                | 95                | 7612               | 4.26E-02 |
| ko04360    | Axon guidance                                 | 11                | 259                | 181               | 7612               | 4.45E-02 |
| ko05202    | Transcriptional misregulation in cancer       | 11                | 259                | 185               | 7612               | 5.06E-02 |
| ko04610    | Complement and coagulation cascades           | 6                 | 259                | 79                | 7612               | 5.17E-02 |
| ko04933    | AGE-RAGE signaling pathway in diabetic cor    | 7                 | 259                | 100               | 7612               | 5.36E-02 |
| ko04514    | Cell adhesion molecules (CAMs)                | 9                 | 259                | 144               | 7612               | 5.67E-02 |
| ko05200    | Pathways in cancer                            | 25                | 259                | 528               | 7612               | 5.70E-02 |
| ko00380    | Tryptophan metabolism                         | 4                 | 259                | 43                | 7612               | 5.73E-02 |
| ko04022    | cGMP-PKG signaling pathway                    | 10                | 259                | 167               | 7612               | 5.84E-02 |
| ko04611    | Platelet activation                           | 8                 | 259                | 124               | 7612               | 6.04E-02 |
| ko04926    | Relaxin signaling pathway                     | 8                 | 259                | 130               | 7612               | 7.51E-02 |
| ko05205    | Proteoglycans in cancer                       | 11                | 259                | 199               | 7612               | 7.68E-02 |
| ko05163    | Human cytomegalovirus infection               | 12                | 259                | 223               | 7612               | 7.78E-02 |
| ko00330    | Arginine and proline metabolism               | 4                 | 259                | 49                | 7612               | 8.43E-02 |
| ko05414    | Dilated cardiomyopathy (DCM)                  | 6                 | 259                | 90                | 7612               | 8.56E-02 |
| ko04725    | Cholinergic synapse                           | 7                 | 259                | 112               | 7612               | 8.68E-02 |
| ko00410    | beta-Alanine metabolism                       | 3                 | 259                | 31                | 7612               | 8.70E-02 |
| ko05140    | Leishmaniasis                                 | 5                 | 259                | 70                | 7612               | 8.92E-02 |
| ko04218    | Cellular senescence                           | 9                 | 259                | 158               | 7612               | 8.96E-02 |
| ko04657    | IL-17 signaling pathway                       | 6                 | 259                | 93                | 7612               | 9.65E-02 |
| ko04550    | Signaling pathways regulating pluripotency of | 8                 | 259                | 139               | 7612               | 1.01E-01 |
| ko04071    | Sphingolipid signaling pathway                | 7                 | 259                | 119               | 7612               | 1.11E-01 |
| ko04971    | Gastric acid secretion                        | 5                 | 259                | 75                | 7612               | 1.11E-01 |
| ko05330    | Allograft rejection                           | 3                 | 259                | 35                | 7612               | 1.15E-01 |
| ko05134    | Legionellosis                                 | 4                 | 259                | 55                | 7612               | 1.16E-01 |

|         |                                                |    |     |     |      |          |
|---------|------------------------------------------------|----|-----|-----|------|----------|
| ko05416 | Viral myocarditis                              | 4  | 259 | 56  | 7612 | 1.22E-01 |
| ko05340 | Primary immunodeficiency                       | 3  | 259 | 36  | 7612 | 1.23E-01 |
| ko00500 | Starch and sucrose metabolism                  | 3  | 259 | 36  | 7612 | 1.23E-01 |
| ko05143 | African trypanosomiasis                        | 3  | 259 | 36  | 7612 | 1.23E-01 |
| ko05216 | Thyroid cancer                                 | 3  | 259 | 37  | 7612 | 1.30E-01 |
| ko05332 | Graft-versus-host disease                      | 3  | 259 | 37  | 7612 | 1.30E-01 |
| ko04621 | NOD-like receptor signaling pathway            | 9  | 259 | 177 | 7612 | 1.49E-01 |
| ko04928 | Parathyroid hormone synthesis, secretion and   | 6  | 259 | 106 | 7612 | 1.52E-01 |
| ko05165 | Human papillomavirus infection                 | 15 | 259 | 330 | 7612 | 1.55E-01 |
| ko05132 | Salmonella infection                           | 5  | 259 | 84  | 7612 | 1.57E-01 |
| ko05219 | Bladder cancer                                 | 3  | 259 | 41  | 7612 | 1.62E-01 |
| ko04940 | Type I diabetes mellitus                       | 3  | 259 | 41  | 7612 | 1.62E-01 |
| ko04270 | Vascular smooth muscle contraction             | 7  | 259 | 132 | 7612 | 1.63E-01 |
| ko05410 | Hypertrophic cardiomyopathy (HCM)              | 5  | 259 | 85  | 7612 | 1.63E-01 |
| ko04015 | Rap1 signaling pathway                         | 10 | 259 | 206 | 7612 | 1.64E-01 |
| ko04911 | Insulin secretion                              | 5  | 259 | 86  | 7612 | 1.68E-01 |
| ko04310 | Wnt signaling pathway                          | 8  | 259 | 158 | 7612 | 1.70E-01 |
| ko05150 | Staphylococcus aureus infection                | 4  | 259 | 64  | 7612 | 1.73E-01 |
| ko05167 | Kaposi sarcoma-associated herpesvirus infecti  | 9  | 259 | 186 | 7612 | 1.83E-01 |
| ko00340 | Histidine metabolism                           | 2  | 259 | 23  | 7612 | 1.83E-01 |
| ko04614 | Renin-angiotensin system                       | 2  | 259 | 23  | 7612 | 1.83E-01 |
| ko04210 | Apoptosis                                      | 7  | 259 | 137 | 7612 | 1.85E-01 |
| ko05230 | Central carbon metabolism in cancer            | 4  | 259 | 66  | 7612 | 1.86E-01 |
| ko04020 | Calcium signaling pathway                      | 9  | 259 | 187 | 7612 | 1.87E-01 |
| ko00750 | Vitamin B6 metabolism                          | 1  | 259 | 6   | 7612 | 1.88E-01 |
| ko04973 | Carbohydrate digestion and absorption          | 3  | 259 | 44  | 7612 | 1.88E-01 |
| ko04974 | Protein digestion and absorption               | 5  | 259 | 90  | 7612 | 1.91E-01 |
| ko04724 | Glutamatergic synapse                          | 6  | 259 | 114 | 7612 | 1.92E-01 |
| ko05222 | Small cell lung cancer                         | 5  | 259 | 92  | 7612 | 2.03E-01 |
| ko04612 | Antigen processing and presentation            | 4  | 259 | 69  | 7612 | 2.07E-01 |
| ko04064 | NF-kappa B signaling pathway                   | 5  | 259 | 93  | 7612 | 2.10E-01 |
| ko00790 | Folate biosynthesis                            | 2  | 259 | 26  | 7612 | 2.21E-01 |
| ko05412 | Arrhythmogenic right ventricular cardiomyopa   | 4  | 259 | 72  | 7612 | 2.29E-01 |
| ko04913 | Ovarian steroidogenesis                        | 3  | 259 | 49  | 7612 | 2.32E-01 |
| ko05169 | Epstein-Barr virus infection                   | 9  | 259 | 198 | 7612 | 2.32E-01 |
| ko00601 | Glycosphingolipid biosynthesis - lacto and nec | 2  | 259 | 27  | 7612 | 2.34E-01 |
| ko01040 | Biosynthesis of unsaturated fatty acids        | 2  | 259 | 27  | 7612 | 2.34E-01 |
| ko00062 | Fatty acid elongation                          | 2  | 259 | 27  | 7612 | 2.34E-01 |
| ko04713 | Circadian entrainment                          | 5  | 259 | 97  | 7612 | 2.34E-01 |
| ko04972 | Pancreatic secretion                           | 5  | 259 | 98  | 7612 | 2.41E-01 |
| ko04925 | Aldosterone synthesis and secretion            | 5  | 259 | 98  | 7612 | 2.41E-01 |
| ko04918 | Thyroid hormone synthesis                      | 4  | 259 | 74  | 7612 | 2.44E-01 |
| ko00650 | Butanoate metabolism                           | 2  | 259 | 28  | 7612 | 2.46E-01 |
| ko05133 | Pertussis                                      | 4  | 259 | 76  | 7612 | 2.59E-01 |
| ko05142 | Chagas disease (American trypanosomiasis)      | 5  | 259 | 102 | 7612 | 2.67E-01 |
| ko05322 | Systemic lupus erythematosus                   | 6  | 259 | 130 | 7612 | 2.81E-01 |
| ko05130 | Pathogenic Escherichia coli infection          | 3  | 259 | 55  | 7612 | 2.88E-01 |
| ko04742 | Taste transduction                             | 4  | 259 | 82  | 7612 | 3.05E-01 |
| ko04810 | Regulation of actin cytoskeleton               | 9  | 259 | 214 | 7612 | 3.05E-01 |
| ko04931 | Insulin resistance                             | 5  | 259 | 108 | 7612 | 3.06E-01 |

|         |                                                |   |     |     |      |          |
|---------|------------------------------------------------|---|-----|-----|------|----------|
| ko05145 | Toxoplasmosis                                  | 5 | 259 | 110 | 7612 | 3.20E-01 |
| ko04915 | Estrogen signaling pathway                     | 6 | 259 | 137 | 7612 | 3.23E-01 |
| ko04670 | Leukocyte transendothelial migration           | 5 | 259 | 112 | 7612 | 3.33E-01 |
| ko00250 | Alanine, aspartate and glutamate metabolism    | 2 | 259 | 35  | 7612 | 3.35E-01 |
| ko04146 | Peroxisome                                     | 4 | 259 | 86  | 7612 | 3.36E-01 |
| ko04726 | Serotonergic synapse                           | 5 | 259 | 113 | 7612 | 3.40E-01 |
| ko05225 | Hepatocellular carcinoma                       | 7 | 259 | 167 | 7612 | 3.41E-01 |
| ko04540 | Gap junction                                   | 4 | 259 | 88  | 7612 | 3.51E-01 |
| ko04960 | Aldosterone-regulated sodium reabsorption      | 2 | 259 | 37  | 7612 | 3.60E-01 |
| ko04919 | Thyroid hormone signaling pathway              | 5 | 259 | 116 | 7612 | 3.60E-01 |
| ko05321 | Inflammatory bowel disease (IBD)               | 3 | 259 | 63  | 7612 | 3.63E-01 |
| ko04666 | Fc gamma R-mediated phagocytosis               | 4 | 259 | 90  | 7612 | 3.67E-01 |
| ko04970 | Salivary secretion                             | 4 | 259 | 91  | 7612 | 3.75E-01 |
| ko00533 | Glycosaminoglycan biosynthesis - keratan sulf  | 1 | 259 | 14  | 7612 | 3.84E-01 |
| ko05032 | Morphine addiction                             | 4 | 259 | 93  | 7612 | 3.90E-01 |
| ko04723 | Retrograde endocannabinoid signaling           | 6 | 259 | 148 | 7612 | 3.90E-01 |
| ko05226 | Gastric cancer                                 | 6 | 259 | 148 | 7612 | 3.90E-01 |
| ko04927 | Cortisol synthesis and secretion               | 3 | 259 | 66  | 7612 | 3.91E-01 |
| ko04720 | Long-term potentiation                         | 3 | 259 | 67  | 7612 | 4.00E-01 |
| ko04664 | Fc epsilon RI signaling pathway                | 3 | 259 | 67  | 7612 | 4.00E-01 |
| ko00604 | Glycosphingolipid biosynthesis - ganglio serie | 1 | 259 | 15  | 7612 | 4.05E-01 |
| ko00603 | Glycosphingolipid biosynthesis - globo and isc | 1 | 259 | 15  | 7612 | 4.05E-01 |
| ko04110 | Cell cycle                                     | 5 | 259 | 124 | 7612 | 4.15E-01 |
| ko04924 | Renin secretion                                | 3 | 259 | 69  | 7612 | 4.19E-01 |
| ko05211 | Renal cell carcinoma                           | 3 | 259 | 69  | 7612 | 4.19E-01 |
| ko04114 | Oocyte meiosis                                 | 5 | 259 | 125 | 7612 | 4.22E-01 |
| ko04390 | Hippo signaling pathway                        | 6 | 259 | 154 | 7612 | 4.27E-01 |
| ko04662 | B cell receptor signaling pathway              | 3 | 259 | 70  | 7612 | 4.28E-01 |
| ko05170 | Human immunodeficiency virus 1 infection       | 8 | 259 | 211 | 7612 | 4.29E-01 |
| ko04914 | Progesterone-mediated oocyte maturation        | 4 | 259 | 99  | 7612 | 4.37E-01 |
| ko00071 | Fatty acid degradation                         | 2 | 259 | 44  | 7612 | 4.45E-01 |
| ko04976 | Bile secretion                                 | 3 | 259 | 72  | 7612 | 4.46E-01 |
| ko04520 | Adherens junction                              | 3 | 259 | 72  | 7612 | 4.46E-01 |
| ko04934 | Cushing syndrome                               | 6 | 259 | 158 | 7612 | 4.51E-01 |
| ko04660 | T cell receptor signaling pathway              | 4 | 259 | 101 | 7612 | 4.52E-01 |
| ko04916 | Melanogenesis                                  | 4 | 259 | 101 | 7612 | 4.52E-01 |
| ko02010 | ABC transporters                               | 2 | 259 | 45  | 7612 | 4.56E-01 |
| ko04620 | Toll-like receptor signaling pathway           | 4 | 259 | 102 | 7612 | 4.59E-01 |
| ko03320 | PPAR signaling pathway                         | 3 | 259 | 74  | 7612 | 4.64E-01 |
| ko00450 | Selenocompound metabolism                      | 1 | 259 | 18  | 7612 | 4.64E-01 |
| ko04672 | Intestinal immune network for IgA production   | 2 | 259 | 46  | 7612 | 4.67E-01 |
| ko04625 | C-type lectin receptor signaling pathway       | 4 | 259 | 104 | 7612 | 4.74E-01 |
| ko04630 | Jak-STAT signaling pathway                     | 6 | 259 | 162 | 7612 | 4.76E-01 |
| ko04217 | Necroptosis                                    | 6 | 259 | 162 | 7612 | 4.76E-01 |
| ko04930 | Type II diabetes mellitus                      | 2 | 259 | 47  | 7612 | 4.79E-01 |
| ko00600 | Sphingolipid metabolism                        | 2 | 259 | 47  | 7612 | 4.79E-01 |
| ko04659 | Th17 cell differentiation                      | 4 | 259 | 105 | 7612 | 4.82E-01 |
| ko04961 | Endocrine and other factor-regulated calcium i | 2 | 259 | 48  | 7612 | 4.90E-01 |
| ko04330 | Notch signaling pathway                        | 2 | 259 | 48  | 7612 | 4.90E-01 |
| ko00270 | Cysteine and methionine metabolism             | 2 | 259 | 48  | 7612 | 4.90E-01 |

|         |                                              |    |     |     |      |          |
|---------|----------------------------------------------|----|-----|-----|------|----------|
| ko00280 | Valine, leucine and isoleucine degradation   | 2  | 259 | 48  | 7612 | 4.90E-01 |
| ko00532 | Glycosaminoglycan biosynthesis - chondroitin | 1  | 259 | 20  | 7612 | 5.00E-01 |
| ko00670 | One carbon pool by folate                    | 1  | 259 | 20  | 7612 | 5.00E-01 |
| ko05320 | Autoimmune thyroid disease                   | 2  | 259 | 50  | 7612 | 5.12E-01 |
| ko05164 | Influenza A                                  | 6  | 259 | 169 | 7612 | 5.17E-01 |
| ko00220 | Arginine biosynthesis                        | 1  | 259 | 21  | 7612 | 5.17E-01 |
| ko04668 | TNF signaling pathway                        | 4  | 259 | 110 | 7612 | 5.18E-01 |
| ko05014 | Amyotrophic lateral sclerosis (ALS)          | 2  | 259 | 51  | 7612 | 5.22E-01 |
| ko05010 | Alzheimer disease                            | 6  | 259 | 171 | 7612 | 5.29E-01 |
| ko04014 | Ras signaling pathway                        | 8  | 259 | 233 | 7612 | 5.41E-01 |
| ko03430 | Mismatch repair                              | 1  | 259 | 23  | 7612 | 5.49E-01 |
| ko04964 | Proximal tubule bicarbonate reclamation      | 1  | 259 | 23  | 7612 | 5.49E-01 |
| ko00515 | Mannose type O-glycan biosynthesis           | 1  | 259 | 23  | 7612 | 5.49E-01 |
| ko05152 | Tuberculosis                                 | 6  | 259 | 175 | 7612 | 5.51E-01 |
| ko05224 | Breast cancer                                | 5  | 259 | 147 | 7612 | 5.65E-01 |
| ko05210 | Colorectal cancer                            | 3  | 259 | 86  | 7612 | 5.65E-01 |
| ko05034 | Alcoholism                                   | 6  | 259 | 180 | 7612 | 5.79E-01 |
| ko00240 | Pyrimidine metabolism                        | 2  | 259 | 57  | 7612 | 5.83E-01 |
| ko04727 | GABAergic synapse                            | 3  | 259 | 89  | 7612 | 5.88E-01 |
| ko05213 | Endometrial cancer                           | 2  | 259 | 58  | 7612 | 5.92E-01 |
| ko04950 | Maturity onset diabetes of the young         | 1  | 259 | 26  | 7612 | 5.94E-01 |
| ko04150 | mTOR signaling pathway                       | 5  | 259 | 152 | 7612 | 5.95E-01 |
| ko04921 | Oxytocin signaling pathway                   | 5  | 259 | 153 | 7612 | 6.00E-01 |
| ko04966 | Collecting duct acid secretion               | 1  | 259 | 27  | 7612 | 6.08E-01 |
| ko04080 | Neuroactive ligand-receptor interaction      | 11 | 259 | 340 | 7612 | 6.13E-01 |
| ko04912 | GnRH signaling pathway                       | 3  | 259 | 93  | 7612 | 6.18E-01 |
| ko00561 | Glycerolipid metabolism                      | 2  | 259 | 61  | 7612 | 6.20E-01 |
| ko04730 | Long-term depression                         | 2  | 259 | 61  | 7612 | 6.20E-01 |
| ko04650 | Natural killer cell mediated cytotoxicity    | 4  | 259 | 126 | 7612 | 6.26E-01 |
| ko05217 | Basal cell carcinoma                         | 2  | 259 | 63  | 7612 | 6.38E-01 |
| ko00590 | Arachidonic acid metabolism                  | 2  | 259 | 64  | 7612 | 6.46E-01 |
| ko00760 | Nicotinate and nicotinamide metabolism       | 1  | 259 | 30  | 7612 | 6.47E-01 |
| ko05215 | Prostate cancer                              | 3  | 259 | 97  | 7612 | 6.47E-01 |
| ko04728 | Dopaminergic synapse                         | 4  | 259 | 131 | 7612 | 6.57E-01 |
| ko01523 | Antifolate resistance                        | 1  | 259 | 31  | 7612 | 6.59E-01 |
| ko03020 | RNA polymerase                               | 1  | 259 | 31  | 7612 | 6.59E-01 |
| ko00230 | Purine metabolism                            | 4  | 259 | 132 | 7612 | 6.63E-01 |
| ko04068 | FoxO signaling pathway                       | 4  | 259 | 133 | 7612 | 6.69E-01 |
| ko00640 | Propanoate metabolism                        | 1  | 259 | 32  | 7612 | 6.70E-01 |
| ko00830 | Retinol metabolism                           | 2  | 259 | 68  | 7612 | 6.79E-01 |
| ko00051 | Fructose and mannose metabolism              | 1  | 259 | 33  | 7612 | 6.82E-01 |
| ko04010 | MAPK signaling pathway                       | 9  | 259 | 296 | 7612 | 6.84E-01 |
| ko00010 | Glycolysis / Gluconeogenesis                 | 2  | 259 | 69  | 7612 | 6.87E-01 |
| ko04922 | Glucagon signaling pathway                   | 3  | 259 | 103 | 7612 | 6.87E-01 |
| ko00040 | Pentose and glucuronate interconversions     | 1  | 259 | 34  | 7612 | 6.93E-01 |
| ko04920 | Adipocytokine signaling pathway              | 2  | 259 | 70  | 7612 | 6.94E-01 |
| ko05168 | Herpes simplex virus 1 infection             | 15 | 259 | 489 | 7612 | 7.01E-01 |
| ko05020 | Prion diseases                               | 1  | 259 | 35  | 7612 | 7.03E-01 |
| ko01524 | Platinum drug resistance                     | 2  | 259 | 72  | 7612 | 7.09E-01 |
| ko04115 | p53 signaling pathway                        | 2  | 259 | 72  | 7612 | 7.09E-01 |

|         |                                                  |   |     |     |      |          |
|---------|--------------------------------------------------|---|-----|-----|------|----------|
| ko05012 | Parkinson disease                                | 4 | 259 | 142 | 7612 | 7.18E-01 |
| ko05100 | Bacterial invasion of epithelial cells           | 2 | 259 | 74  | 7612 | 7.23E-01 |
| ko04261 | Adrenergic signaling in cardiomyocytes           | 4 | 259 | 145 | 7612 | 7.33E-01 |
| ko05220 | Chronic myeloid leukemia                         | 2 | 259 | 76  | 7612 | 7.37E-01 |
| ko04072 | Phospholipase D signaling pathway                | 4 | 259 | 147 | 7612 | 7.43E-01 |
| ko04260 | Cardiac muscle contraction                       | 2 | 259 | 78  | 7612 | 7.50E-01 |
| ko04721 | Synaptic vesicle cycle                           | 2 | 259 | 78  | 7612 | 7.50E-01 |
| ko00260 | Glycine, serine and threonine metabolism         | 1 | 259 | 40  | 7612 | 7.51E-01 |
| ko04216 | Ferroptosis                                      | 1 | 259 | 40  | 7612 | 7.51E-01 |
| ko00860 | Porphyrin and chlorophyll metabolism             | 1 | 259 | 42  | 7612 | 7.67E-01 |
| ko04722 | Neurotrophin signaling pathway                   | 3 | 259 | 119 | 7612 | 7.76E-01 |
| ko04962 | Vasopressin-regulated water reabsorption         | 1 | 259 | 44  | 7612 | 7.83E-01 |
| ko04012 | ErbB signaling pathway                           | 2 | 259 | 85  | 7612 | 7.91E-01 |
| ko00565 | Ether lipid metabolism                           | 1 | 259 | 47  | 7612 | 8.04E-01 |
| ko00520 | Amino sugar and nucleotide sugar metabolism      | 1 | 259 | 48  | 7612 | 8.11E-01 |
| ko05161 | Hepatitis B                                      | 4 | 259 | 163 | 7612 | 8.11E-01 |
| ko04658 | Th1 and Th2 cell differentiation                 | 2 | 259 | 90  | 7612 | 8.17E-01 |
| ko05110 | Vibrio cholerae infection                        | 1 | 259 | 50  | 7612 | 8.24E-01 |
| ko00510 | N-Glycan biosynthesis                            | 1 | 259 | 50  | 7612 | 8.24E-01 |
| ko04979 | Cholesterol metabolism                           | 1 | 259 | 50  | 7612 | 8.24E-01 |
| ko01522 | Endocrine resistance                             | 2 | 259 | 96  | 7612 | 8.44E-01 |
| ko03460 | Fanconi anemia pathway                           | 1 | 259 | 54  | 7612 | 8.47E-01 |
| ko00564 | Glycerophospholipid metabolism                   | 2 | 259 | 97  | 7612 | 8.48E-01 |
| ko05231 | Choline metabolism in cancer                     | 2 | 259 | 99  | 7612 | 8.56E-01 |
| ko04923 | Regulation of lipolysis in adipocytes            | 1 | 259 | 56  | 7612 | 8.57E-01 |
| ko00480 | Glutathione metabolism                           | 1 | 259 | 56  | 7612 | 8.57E-01 |
| ko04070 | Phosphatidylinositol signaling system            | 2 | 259 | 100 | 7612 | 8.60E-01 |
| ko04066 | HIF-1 signaling pathway                          | 2 | 259 | 100 | 7612 | 8.60E-01 |
| ko00310 | Lysine degradation                               | 1 | 259 | 59  | 7612 | 8.71E-01 |
| ko00140 | Steroid hormone biosynthesis                     | 1 | 259 | 60  | 7612 | 8.76E-01 |
| ko04213 | Longevity regulating pathway - multiple species  | 1 | 259 | 64  | 7612 | 8.92E-01 |
| ko05131 | Shigellosis                                      | 1 | 259 | 65  | 7612 | 8.96E-01 |
| ko05223 | Non-small cell lung cancer                       | 1 | 259 | 66  | 7612 | 8.99E-01 |
| ko05221 | Acute myeloid leukemia                           | 1 | 259 | 66  | 7612 | 8.99E-01 |
| ko05160 | Hepatitis C                                      | 3 | 259 | 155 | 7612 | 9.03E-01 |
| ko05120 | Epithelial cell signaling in Helicobacter pylori | 1 | 259 | 68  | 7612 | 9.06E-01 |
| ko04917 | Prolactin signaling pathway                      | 1 | 259 | 70  | 7612 | 9.12E-01 |
| ko04622 | RIG-I-like receptor signaling pathway            | 1 | 259 | 70  | 7612 | 9.12E-01 |
| ko05203 | Viral carcinogenesis                             | 4 | 259 | 200 | 7612 | 9.14E-01 |
| ko05218 | Melanoma                                         | 1 | 259 | 72  | 7612 | 9.18E-01 |
| ko04141 | Protein processing in endoplasmic reticulum      | 3 | 259 | 165 | 7612 | 9.24E-01 |
| ko04142 | Lysosome                                         | 2 | 259 | 123 | 7612 | 9.26E-01 |
| ko05212 | Pancreatic cancer                                | 1 | 259 | 75  | 7612 | 9.26E-01 |
| ko00562 | Inositol phosphate metabolism                    | 1 | 259 | 75  | 7612 | 9.26E-01 |
| ko03008 | Ribosome biogenesis in eukaryotes                | 1 | 259 | 78  | 7612 | 9.34E-01 |
| ko00983 | Drug metabolism - other enzymes                  | 1 | 259 | 78  | 7612 | 9.34E-01 |
| ko04530 | Tight junction                                   | 3 | 259 | 171 | 7612 | 9.35E-01 |
| ko03018 | RNA degradation                                  | 1 | 259 | 79  | 7612 | 9.36E-01 |
| ko01521 | EGFR tyrosine kinase inhibitor resistance        | 1 | 259 | 79  | 7612 | 9.36E-01 |
| ko04140 | Autophagy - animal                               | 2 | 259 | 129 | 7612 | 9.38E-01 |

|         |                                           |   |     |     |      |          |
|---------|-------------------------------------------|---|-----|-----|------|----------|
| ko05204 | Chemical carcinogenesis                   | 1 | 259 | 82  | 7612 | 9.42E-01 |
| ko00190 | Oxidative phosphorylation                 | 2 | 259 | 133 | 7612 | 9.45E-01 |
| ko03015 | mRNA surveillance pathway                 | 1 | 259 | 91  | 7612 | 9.58E-01 |
| ko04211 | Longevity regulating pathway              | 1 | 259 | 91  | 7612 | 9.58E-01 |
| ko05016 | Huntington disease                        | 3 | 259 | 194 | 7612 | 9.64E-01 |
| ko04932 | Non-alcoholic fatty liver disease (NAFLD) | 2 | 259 | 149 | 7612 | 9.65E-01 |
| ko04024 | cAMP signaling pathway                    | 3 | 259 | 212 | 7612 | 9.78E-01 |
| ko04152 | AMPK signaling pathway                    | 1 | 259 | 121 | 7612 | 9.85E-01 |
| ko04714 | Thermogenesis                             | 3 | 259 | 231 | 7612 | 9.87E-01 |
| ko03040 | Spliceosome                               | 1 | 259 | 133 | 7612 | 9.90E-01 |
| ko03010 | Ribosome                                  | 1 | 259 | 134 | 7612 | 9.91E-01 |
| ko04144 | Endocytosis                               | 3 | 259 | 244 | 7612 | 9.91E-01 |
| ko04120 | Ubiquitin mediated proteolysis            | 1 | 259 | 136 | 7612 | 9.91E-01 |
| ko05162 | Measles                                   | 1 | 259 | 138 | 7612 | 9.92E-01 |
| ko04910 | Insulin signaling pathway                 | 1 | 259 | 138 | 7612 | 9.92E-01 |
| ko04740 | Olfactory transduction                    | 3 | 259 | 442 | 7612 | 1.00E+00 |

**Supplementary Table 6. GSEA plots showing the pathways of DEGs altered by IGF2BP3 were involved in acute myeloid leukemia cells.**

| ID                                                      | setSize | enrichmentScore | NES     | pvalue | p.adjust | qvalues | rank | leading_edge                   |
|---------------------------------------------------------|---------|-----------------|---------|--------|----------|---------|------|--------------------------------|
| KEGG_ALLOGRAFT_REJECTION                                | 30      | -0.8316         | -1.8057 | 0.0001 | 0.0049   | 0.0024  | 3429 | tags=37%, list=6%, signal=34%  |
| KEGG_GLYOXYLATE_AND_DICARBOXYLATE_METABOLISM            | 16      | 0.6513          | 2.3934  | 0.0003 | 0.0049   | 0.0024  | 7757 | tags=62%, list=15%, signal=53% |
| KEGG_STEROID_BIOSYNTHESIS                               | 17      | 0.7294          | 2.7401  | 0.0003 | 0.0049   | 0.0024  | 5646 | tags=71%, list=11%, signal=63% |
| KEGG_MISMATCH_REPAIR                                    | 23      | 0.6863          | 2.8717  | 0.0003 | 0.0049   | 0.0024  | 7417 | tags=70%, list=14%, signal=60% |
| KEGG_GLYCOSYLPHOSPHATIDYLINOSITOL_GPI_ANCHOR_BIOGENESIS | 25      | 0.6466          | 2.7761  | 0.0004 | 0.0049   | 0.0024  | 7931 | tags=56%, list=15%, signal=48% |
| KEGG_HOMOLOGOUS_RECOMBINATION                           | 28      | 0.6119          | 2.7337  | 0.0004 | 0.0049   | 0.0024  | 8033 | tags=57%, list=15%, signal=48% |
| KEGG_RNA_POLYMERASE                                     | 28      | 0.6471          | 2.8911  | 0.0004 | 0.0049   | 0.0024  | 7381 | tags=59%, list=14%, signal=50% |
| KEGG_CITRATE_CYCLE_TCA_CYCLE                            | 29      | 0.5994          | 2.7114  | 0.0004 | 0.0049   | 0.0024  | 8542 | tags=62%, list=16%, signal=52% |
| KEGG_PROPANOATE_METABOLISM                              | 29      | 0.5847          | 2.6452  | 0.0004 | 0.0049   | 0.0024  | 8370 | tags=55%, list=16%, signal=46% |
| KEGG_AUTOIMMUNE_THYROID_DISEASE                         | 43      | -0.7697         | -1.7677 | 0.0005 | 0.0049   | 0.0024  | 2378 | tags=23%, list=5%, signal=22%  |
| KEGG_TERPENOID_BACKBONE_BIOSYNTHESIS                    | 14      | 0.6786          | 2.3818  | 0.0005 | 0.0049   | 0.0024  | 3840 | tags=50%, list=7%, signal=46%  |
| KEGG_BASAL_TRANSCRIPTION_FACTORS                        | 35      | 0.4965          | 2.3958  | 0.0005 | 0.0049   | 0.0024  | 8381 | tags=43%, list=16%, signal=36% |
| KEGG_BASE_EXCISION_REPAIR                               | 35      | 0.7240          | 3.4934  | 0.0005 | 0.0049   | 0.0024  | 7577 | tags=66%, list=14%, signal=56% |
| KEGG_DNA_REPLICATION                                    | 36      | 0.7687          | 3.7527  | 0.0005 | 0.0049   | 0.0024  | 7566 | tags=81%, list=14%, signal=69% |
| KEGG_SNARE_INTERACTIONS_IN_VESICULAR_TRANSPORT          | 36      | 0.5471          | 2.6708  | 0.0005 | 0.0049   | 0.0024  | 7973 | tags=44%, list=15%, signal=38% |
| KEGG_FATTY_ACID_METABOLISM                              | 38      | 0.5604          | 2.7884  | 0.0006 | 0.0049   | 0.0024  | 7222 | tags=58%, list=14%, signal=50% |
| KEGG_PYRUVATE_METABOLISM                                | 38      | 0.4529          | 2.2534  | 0.0006 | 0.0049   | 0.0024  | 8370 | tags=45%, list=16%, signal=38% |
| KEGG_LYSINE_DEGRADATION                                 | 39      | 0.6041          | 3.0359  | 0.0006 | 0.0049   | 0.0024  | 8542 | tags=59%, list=16%, signal=49% |

|                                                 |    |         |         |        |        |        |      |                                |
|-------------------------------------------------|----|---------|---------|--------|--------|--------|------|--------------------------------|
| KEGG_VASOPRESSIN_REGULATED_WATER_REABSORPTION   | 40 | 0.5616  | 2.8503  | 0.0006 | 0.0049 | 0.0024 | 7925 | tags=52%, list=15%, signal=45% |
| KEGG_AMINO_SUGAR_AND_NUCLEOTIDE_SUGAR_METABOLI  | 41 | 0.6666  | 3.4035  | 0.0006 | 0.0049 | 0.0024 | 8474 | tags=66%, list=16%, signal=55% |
| KEGG_SULFUR_METABOLISM                          | 10 | 0.6705  | 2.0755  | 0.0007 | 0.0049 | 0.0024 | 8439 | tags=60%, list=16%, signal=50% |
| KEGG_NUCLEOTIDE_EXCISION_REPAIR                 | 44 | 0.6954  | 3.6393  | 0.0007 | 0.0049 | 0.0024 | 7744 | tags=61%, list=15%, signal=52% |
| KEGG_PROTEASOME                                 | 44 | 0.5817  | 3.0442  | 0.0007 | 0.0049 | 0.0024 | 8483 | tags=55%, list=16%, signal=46% |
| KEGG_GALACTOSE_METABOLISM                       | 24 | 0.5612  | 2.3723  | 0.0007 | 0.0049 | 0.0024 | 8166 | tags=58%, list=15%, signal=49% |
| KEGG_ENDOMETRIAL_CANCER                         | 45 | 0.5482  | 2.8855  | 0.0007 | 0.0049 | 0.0024 | 8247 | tags=62%, list=16%, signal=53% |
| KEGG_GLUTATHIONE_METABOLISM                     | 45 | 0.5686  | 2.9927  | 0.0007 | 0.0049 | 0.0024 | 6741 | tags=49%, list=13%, signal=43% |
| KEGG_N_GLYCAN_BIOSYNTHESIS                      | 45 | 0.5637  | 2.9668  | 0.0007 | 0.0049 | 0.0024 | 7262 | tags=44%, list=14%, signal=38% |
| KEGG_ARACHIDONIC_ACID_METABOLISM                | 47 | 0.4279  | 2.2956  | 0.0008 | 0.0049 | 0.0024 | 3508 | tags=26%, list=7%, signal=24%  |
| KEGG_PATHOGENIC_ESCHERICHIA_COLI_INFECTION      | 48 | 0.4890  | 2.6376  | 0.0008 | 0.0049 | 0.0024 | 6795 | tags=54%, list=13%, signal=47% |
| KEGG_VIBRIO_CHOLERAE_INFECTION                  | 48 | 0.5890  | 3.1767  | 0.0008 | 0.0049 | 0.0024 | 8489 | tags=58%, list=16%, signal=49% |
| KEGG_INOSITOL_PHOSPHATE_METABOLISM              | 51 | 0.5465  | 2.9763  | 0.0009 | 0.0051 | 0.0025 | 8131 | tags=59%, list=15%, signal=50% |
| KEGG_NON_SMALL_CELL_LUNG_CANCER                 | 52 | 0.5741  | 3.1430  | 0.0009 | 0.0051 | 0.0025 | 8282 | tags=62%, list=16%, signal=52% |
| KEGG_GLYCOSAMINOGLYCAN_DEGRADATION              | 20 | 0.5692  | 2.2633  | 0.0009 | 0.0051 | 0.0025 | 8174 | tags=50%, list=15%, signal=42% |
| KEGG_ACUTE_MYELOID_LEUKEMIA                     | 53 | 0.6215  | 3.4415  | 0.0010 | 0.0051 | 0.0025 | 8247 | tags=62%, list=16%, signal=53% |
| KEGG_INTESTINAL_IMMUNE_NETWORK_FOR_IGA_PRODUCTI | 37 | -0.7817 | -1.7543 | 0.0010 | 0.0051 | 0.0025 | 4124 | tags=35%, list=8%, signal=32%  |
| KEGG_BLADDER_CANCER                             | 35 | 0.4343  | 2.0953  | 0.0010 | 0.0052 | 0.0025 | 8282 | tags=57%, list=16%, signal=48% |
| KEGG_COLORECTAL_CANCER                          | 56 | 0.5533  | 3.1161  | 0.0011 | 0.0052 | 0.0025 | 8247 | tags=57%, list=16%, signal=48% |



|                                                    |    |         |         |        |        |        |      |                                   |
|----------------------------------------------------|----|---------|---------|--------|--------|--------|------|-----------------------------------|
| KEGG_NOD_LIKE_RECEPTOR_SIGNALING_PATHWAY           | 58 | 0.4266  | 2.4331  | 0.0011 | 0.0052 | 0.0025 | 8446 | tags=40%, list=16%,<br>signal=33% |
| KEGG_RNA_DEGRADATION                               | 59 | 0.4268  | 2.4362  | 0.0012 | 0.0052 | 0.0025 | 8306 | tags=39%, list=16%,<br>signal=33% |
| KEGG_ADHERENS_JUNCTION                             | 60 | 0.4803  | 2.7434  | 0.0012 | 0.0052 | 0.0025 | 9075 | tags=58%, list=17%,<br>signal=48% |
| KEGG_EPITHELIAL_CELL_SIGNALING_IN_HELICOBACTER_PY. | 60 | 0.4609  | 2.6325  | 0.0012 | 0.0052 | 0.0025 | 8212 | tags=45%, list=16%,<br>signal=38% |
| KEGG_P53_SIGNALING_PATHWAY                         | 60 | 0.5516  | 3.1506  | 0.0012 | 0.0052 | 0.0025 | 7964 | tags=50%, list=15%,<br>signal=43% |
| KEGG_GLIOMA                                        | 61 | 0.4914  | 2.8218  | 0.0012 | 0.0052 | 0.0025 | 8282 | tags=54%, list=16%,<br>signal=46% |
| KEGG_BUTANOATE_METABOLISM                          | 29 | 0.4909  | 2.2208  | 0.0013 | 0.0052 | 0.0025 | 8370 | tags=52%, list=16%,<br>signal=44% |
| KEGG_GLYCEROPHOSPHOLIPID_METABOLISM                | 63 | 0.3977  | 2.3157  | 0.0013 | 0.0052 | 0.0025 | 8385 | tags=43%, list=16%,<br>signal=36% |
| KEGG_RENAL_CELL_CARCINOMA                          | 63 | 0.3853  | 2.2439  | 0.0013 | 0.0052 | 0.0025 | 8247 | tags=52%, list=16%,<br>signal=44% |
| KEGG_PANCREATIC_CANCER                             | 65 | 0.5012  | 2.9553  | 0.0014 | 0.0054 | 0.0026 | 8282 | tags=60%, list=16%,<br>signal=51% |
| KEGG_ARGININE_AND_PROLINE_METABOLISM               | 45 | 0.4097  | 2.1564  | 0.0015 | 0.0055 | 0.0027 | 7942 | tags=60%, list=15%,<br>signal=51% |
| KEGG_SPHINGOLIPID_METABOLISM                       | 34 | 0.4454  | 2.1304  | 0.0015 | 0.0055 | 0.0027 | 8538 | tags=65%, list=16%,<br>signal=54% |
| KEGG_B_CELL_RECEPTOR_SIGNALING_PATHWAY             | 68 | 0.4116  | 2.4653  | 0.0015 | 0.0056 | 0.0027 | 8384 | tags=50%, list=16%,<br>signal=42% |
| KEGG_CHRONIC_MYELOID_LEUKEMIA                      | 69 | 0.5063  | 3.0420  | 0.0016 | 0.0057 | 0.0027 | 8371 | tags=52%, list=16%,<br>signal=44% |
| KEGG_SMALL_CELL_LUNG_CANCER                        | 71 | 0.5027  | 3.0182  | 0.0016 | 0.0058 | 0.0028 | 8282 | tags=49%, list=16%,<br>signal=42% |
| KEGG_PHOSPHATIDYLINOSITOL_SIGNALING_SYSTEM         | 72 | 0.4405  | 2.6330  | 0.0017 | 0.0058 | 0.0028 | 8247 | tags=51%, list=16%,<br>signal=43% |
| KEGG_VEGF_SIGNALING_PATHWAY                        | 72 | 0.4566  | 2.7289  | 0.0017 | 0.0058 | 0.0028 | 8247 | tags=42%, list=16%,<br>signal=35% |
| KEGG_CIRCADIAN_RHYTHM_MAMMAL                       | 11 | 0.6271  | 2.0118  | 0.0018 | 0.0061 | 0.0029 | 8169 | tags=55%, list=15%,<br>signal=46% |
| KEGG_ASTHMA                                        | 26 | -0.8006 | -1.7016 | 0.0019 | 0.0062 | 0.0030 | 3111 | tags=35%, list=6%,<br>signal=33%  |

|                                                 |     |         |         |        |        |        |       |                                   |
|-------------------------------------------------|-----|---------|---------|--------|--------|--------|-------|-----------------------------------|
| KEGG_PROGESTERONE_MEDIATED_OOCYTE_MATURATION    | 79  | 0.3893  | 2.3717  | 0.0021 | 0.0066 | 0.0032 | 8555  | tags=41%, list=16%,<br>signal=34% |
| KEGG_ERBB_SIGNALING_PATHWAY                     | 81  | 0.3838  | 2.3644  | 0.0022 | 0.0067 | 0.0033 | 8247  | tags=44%, list=16%,<br>signal=38% |
| KEGG_PROSTATE_CANCER                            | 81  | 0.5034  | 3.1017  | 0.0022 | 0.0067 | 0.0033 | 8282  | tags=53%, list=16%,<br>signal=45% |
| KEGG_TYPE_I_DIABETES_MELLITUS                   | 34  | -0.7673 | -1.6979 | 0.0023 | 0.0069 | 0.0033 | 3429  | tags=29%, list=6%,<br>signal=28%  |
| KEGG_APOPTOSIS                                  | 84  | 0.5183  | 3.2353  | 0.0023 | 0.0070 | 0.0034 | 8452  | tags=60%, list=16%,<br>signal=50% |
| KEGG_FC_GAMMA_R_MEDIATED_PHAGOCYTOSIS           | 89  | 0.5588  | 3.5433  | 0.0027 | 0.0081 | 0.0039 | 8371  | tags=53%, list=16%,<br>signal=45% |
| KEGG_GNRH_SIGNALING_PATHWAY                     | 90  | 0.3103  | 1.9704  | 0.0028 | 0.0081 | 0.0039 | 8141  | tags=38%, list=15%,<br>signal=32% |
| KEGG_PYRIMIDINE_METABOLISM                      | 93  | 0.5993  | 3.8197  | 0.0029 | 0.0084 | 0.0041 | 8088  | tags=56%, list=15%,<br>signal=48% |
| KEGG_AMINOACYL_TRNA_BIOSYNTHESIS                | 22  | 0.4927  | 2.0228  | 0.0030 | 0.0085 | 0.0041 | 8149  | tags=45%, list=15%,<br>signal=38% |
| KEGG_OOCYTE_MEIOSIS                             | 105 | 0.4456  | 2.9022  | 0.0044 | 0.0123 | 0.0060 | 8555  | tags=45%, list=16%,<br>signal=38% |
| KEGG_LYSOSOME                                   | 115 | 0.5287  | 3.5590  | 0.0052 | 0.0141 | 0.0068 | 8152  | tags=59%, list=15%,<br>signal=50% |
| KEGG_CELL_CYCLE                                 | 116 | 0.5063  | 3.4187  | 0.0053 | 0.0142 | 0.0068 | 8555  | tags=52%, list=16%,<br>signal=43% |
| KEGG_VIRAL_MYOCARDITIS                          | 56  | -0.7017 | -1.6604 | 0.0054 | 0.0144 | 0.0069 | 2378  | tags=21%, list=5%,<br>signal=20%  |
| KEGG_NEUROTROPHIN_SIGNALING_PATHWAY             | 117 | 0.4145  | 2.8059  | 0.0055 | 0.0144 | 0.0069 | 8426  | tags=46%, list=16%,<br>signal=39% |
| KEGG_RIG_I_LIKE_RECEPTOR_SIGNALING_PATHWAY      | 65  | 0.3142  | 1.8525  | 0.0056 | 0.0144 | 0.0070 | 8157  | tags=31%, list=15%,<br>signal=26% |
| KEGG_PROTEIN_EXPORT                             | 24  | 0.4533  | 1.9164  | 0.0058 | 0.0147 | 0.0071 | 8489  | tags=42%, list=16%,<br>signal=35% |
| KEGG_PARKINSONS_DISEASE                         | 121 | 0.5383  | 3.6038  | 0.0063 | 0.0157 | 0.0076 | 8300  | tags=65%, list=16%,<br>signal=55% |
| KEGG_GLYCOSAMINOGLYCAN_BIOSYNTHESIS_CHONDROITIN | 19  | 0.4765  | 1.8626  | 0.0064 | 0.0157 | 0.0076 | 10913 | tags=53%, list=21%,<br>signal=42% |
| KEGG_CYTOSOLIC_DNA_SENSING_PATHWAY              | 50  | 0.3559  | 1.9340  | 0.0069 | 0.0168 | 0.0081 | 7781  | tags=30%, list=15%,<br>signal=26% |

|                                                |     |         |         |        |        |        |      |                                   |
|------------------------------------------------|-----|---------|---------|--------|--------|--------|------|-----------------------------------|
| KEGG_SPLICEOSOME                               | 125 | 0.5357  | 3.6195  | 0.0071 | 0.0170 | 0.0082 | 8359 | tags=50%, list=16%,<br>signal=42% |
| KEGG_CELL_ADHESION_MOLECULES_CAMS              | 107 | -0.6324 | -1.5537 | 0.0072 | 0.0170 | 0.0082 | 4124 | tags=22%, list=8%,<br>signal=21%  |
| KEGG_INSULIN_SIGNALING_PATHWAY                 | 128 | 0.3810  | 2.5907  | 0.0076 | 0.0177 | 0.0085 | 8247 | tags=45%, list=16%,<br>signal=38% |
| KEGG_OXIDATIVE_PHOSPHORYLATION                 | 128 | 0.5571  | 3.7887  | 0.0076 | 0.0177 | 0.0085 | 8212 | tags=64%, list=16%,<br>signal=54% |
| KEGG_UBIQUITIN_MEDIATED_PROTEOLYSIS            | 132 | 0.5180  | 3.5767  | 0.0084 | 0.0190 | 0.0092 | 8555 | tags=52%, list=16%,<br>signal=44% |
| KEGG_PANTOTHENATE_AND_COA_BIOSYNTHESIS         | 12  | 0.5467  | 1.8107  | 0.0085 | 0.0190 | 0.0092 | 8342 | tags=50%, list=16%,<br>signal=42% |
| KEGG_GRAFT_VERSUS_HOST_DISEASE                 | 32  | -0.7416 | -1.6278 | 0.0085 | 0.0190 | 0.0092 | 3429 | tags=25%, list=6%,<br>signal=23%  |
| KEGG_TOLL_LIKE_RECEPTOR_SIGNALING_PATHWAY      | 93  | 0.2749  | 1.7520  | 0.0088 | 0.0193 | 0.0093 | 8446 | tags=43%, list=16%,<br>signal=36% |
| KEGG_GLYCEROLIPID_METABOLISM                   | 43  | 0.3634  | 1.8821  | 0.0089 | 0.0193 | 0.0093 | 8614 | tags=49%, list=16%,<br>signal=41% |
| KEGG_WNT_SIGNALING_PATHWAY                     | 136 | 0.3287  | 2.2792  | 0.0090 | 0.0194 | 0.0094 | 8238 | tags=46%, list=16%,<br>signal=39% |
| KEGG_GAP_JUNCTION                              | 74  | 0.2821  | 1.7028  | 0.0091 | 0.0195 | 0.0094 | 7361 | tags=36%, list=14%,<br>signal=31% |
| KEGG_PURINE_METABOLISM                         | 141 | 0.3783  | 2.6500  | 0.0105 | 0.0221 | 0.0107 | 7828 | tags=41%, list=15%,<br>signal=35% |
| KEGG_VALINE_LEUCINE_AND_ISOLEUCINE_DEGRADATION | 40  | 0.3585  | 1.8195  | 0.0129 | 0.0267 | 0.0129 | 8370 | tags=62%, list=16%,<br>signal=53% |
| KEGG_NATURAL_KILLER_CELL_MEDIATED_CYTOTOXICITY | 123 | 0.2792  | 1.8813  | 0.0137 | 0.0282 | 0.0136 | 8452 | tags=37%, list=16%,<br>signal=31% |
| KEGG_ALZHEIMERS_DISEASE                        | 154 | 0.4750  | 3.3632  | 0.0143 | 0.0290 | 0.0140 | 8438 | tags=61%, list=16%,<br>signal=51% |
| KEGG_NEUROACTIVE_LIGAND_RECEPTOR_INTERACTION   | 231 | -0.5471 | -1.3486 | 0.0207 | 0.0417 | 0.0201 | 3406 | tags=13%, list=6%,<br>signal=13%  |
| KEGG_HUNTINGTONS_DISEASE                       | 173 | 0.4547  | 3.3628  | 0.0222 | 0.0442 | 0.0214 | 8074 | tags=59%, list=15%,<br>signal=51% |
| KEGG_SYSTEMIC_LUPUS_ERYTHEMATOSUS              | 52  | -0.6642 | -1.5635 | 0.0241 | 0.0473 | 0.0229 | 3111 | tags=21%, list=6%,<br>signal=20%  |
| KEGG_RIBOFLAVIN_METABOLISM                     | 12  | 0.5000  | 1.6559  | 0.0269 | 0.0523 | 0.0253 | 8373 | tags=42%, list=16%,<br>signal=35% |

|                                                  |     |         |         |        |        |        |       |                                   |
|--------------------------------------------------|-----|---------|---------|--------|--------|--------|-------|-----------------------------------|
| KEGG_CYTOKINE_CYTOKINE_RECEPTOR_INTERACTION      | 219 | -0.5428 | -1.3380 | 0.0284 | 0.0548 | 0.0265 | 4445  | tags=21%, list=8%,<br>signal=19%  |
| KEGG_ETHER_LIPID_METABOLISM                      | 28  | 0.3659  | 1.6346  | 0.0345 | 0.0658 | 0.0318 | 6284  | tags=39%, list=12%,<br>signal=35% |
| KEGG_CYSTEINE_AND_METHIONINE_METABOLISM          | 31  | 0.3511  | 1.6247  | 0.0351 | 0.0663 | 0.0320 | 6663  | tags=29%, list=13%,<br>signal=25% |
| KEGG_THYROID_CANCER                              | 25  | 0.3699  | 1.5883  | 0.0399 | 0.0745 | 0.0360 | 7443  | tags=40%, list=14%,<br>signal=34% |
| KEGG_NON_HOMOLOGOUS_END_JOINING                  | 12  | 0.4784  | 1.5847  | 0.0417 | 0.0771 | 0.0372 | 6989  | tags=33%, list=13%,<br>signal=29% |
| KEGG_DORSO_VENTRAL_AXIS_FORMATION                | 18  | 0.4024  | 1.5419  | 0.0528 | 0.0967 | 0.0467 | 6483  | tags=33%, list=12%,<br>signal=29% |
| KEGG_TASTE_TRANSDUCTION                          | 47  | -0.6105 | -1.4158 | 0.0869 | 0.1575 | 0.0761 | 4161  | tags=21%, list=8%,<br>signal=20%  |
| KEGG_AMYOTROPHIC_LATERAL_SCLEROSIS_ALS           | 49  | 0.2667  | 1.4408  | 0.0892 | 0.1601 | 0.0774 | 8438  | tags=43%, list=16%,<br>signal=36% |
| KEGG_HEMATOPOIETIC_CELL_LINEAGE                  | 58  | -0.5917 | -1.4048 | 0.0906 | 0.1610 | 0.0778 | 3111  | tags=16%, list=6%,<br>signal=15%  |
| KEGG_OTHER_GLYCAN_DEGRADATION                    | 16  | 0.3835  | 1.4091  | 0.1043 | 0.1819 | 0.0879 | 7206  | tags=69%, list=14%,<br>signal=59% |
| KEGG_GLYCOSPHINGOLIPID_BIOSYNTHESIS_GLOBO_SERIES | 13  | -0.7386 | -1.4265 | 0.1044 | 0.1819 | 0.0879 | 1509  | tags=23%, list=3%,<br>signal=22%  |
| KEGG_GLYCINE_SERINE_AND_THREONINE_METABOLISM     | 28  | -0.6538 | -1.4038 | 0.1059 | 0.1829 | 0.0884 | 4387  | tags=39%, list=8%,<br>signal=36%  |
| KEGG_PORPHYRIN_AND_CHLOROPHYLL_METABOLISM        | 36  | 0.2888  | 1.4099  | 0.1092 | 0.1868 | 0.0903 | 9184  | tags=33%, list=17%,<br>signal=28% |
| KEGG_ONE_CARBON_POOL_BY_FOLATE                   | 16  | 0.3763  | 1.3828  | 0.1186 | 0.2009 | 0.0971 | 6712  | tags=31%, list=13%,<br>signal=27% |
| KEGG_ADIPOCYTOKINE_SIGNALING_PATHWAY             | 62  | 0.2299  | 1.3272  | 0.1310 | 0.2200 | 0.1063 | 8015  | tags=31%, list=15%,<br>signal=26% |
| KEGG_LINOLEIC_ACID_METABOLISM                    | 25  | 0.3137  | 1.3468  | 0.1410 | 0.2346 | 0.1133 | 19295 | tags=60%, list=37%,<br>signal=38% |
| KEGG_PRIMARY_BILE_ACID_BIOSYNTHESIS              | 13  | -0.7121 | -1.3752 | 0.1446 | 0.2365 | 0.1143 | 2970  | tags=23%, list=6%,<br>signal=22%  |
| KEGG_ALPHA_LINOLENIC_ACID_METABOLISM             | 17  | 0.3563  | 1.3383  | 0.1447 | 0.2365 | 0.1143 | 6063  | tags=29%, list=11%,<br>signal=26% |
| KEGG_TYROSINE_METABOLISM                         | 35  | -0.6074 | -1.3497 | 0.1489 | 0.2394 | 0.1157 | 4502  | tags=23%, list=9%,<br>signal=21%  |

|                                                  |     |         |         |        |        |        |       |                                   |
|--------------------------------------------------|-----|---------|---------|--------|--------|--------|-------|-----------------------------------|
| KEGG_PHENYLALANINE_METABOLISM                    | 14  | -0.6976 | -1.3596 | 0.1491 | 0.2394 | 0.1157 | 1075  | tags=21%, list=2%,<br>signal=21%  |
| KEGG_PROXIMAL_TUBULE_BICARBONATE_RECLAMATION     | 21  | 0.3250  | 1.3151  | 0.1565 | 0.2474 | 0.1196 | 9466  | tags=43%, list=18%,<br>signal=35% |
| KEGG_CALCIIUM_SIGNALING_PATHWAY                  | 152 | -0.5025 | -1.2391 | 0.1568 | 0.2474 | 0.1196 | 3397  | tags=14%, list=6%,<br>signal=13%  |
| KEGG_HYPERTROPHIC_CARDIOMYOPATHY_HCM             | 69  | -0.5389 | -1.2979 | 0.1682 | 0.2630 | 0.1271 | 4818  | tags=19%, list=9%,<br>signal=17%  |
| KEGG_ARRHYTHMOGENIC_RIGHT_VENTRICULAR_CARDIOMY   | 59  | -0.5456 | -1.2963 | 0.1768 | 0.2743 | 0.1325 | 2791  | tags=15%, list=5%,<br>signal=14%  |
| KEGG_FOLATE_BIOSYNTHESIS                         | 11  | 0.3987  | 1.2789  | 0.1848 | 0.2841 | 0.1373 | 4004  | tags=27%, list=8%,<br>signal=25%  |
| KEGG_TRYPTOPHAN_METABOLISM                       | 33  | -0.5928 | -1.3076 | 0.1906 | 0.2906 | 0.1404 | 1975  | tags=15%, list=4%,<br>signal=15%  |
| KEGG_PRIMARY_IMMUNODEFICIENCY                    | 29  | -0.6001 | -1.2960 | 0.2027 | 0.3066 | 0.1481 | 3422  | tags=21%, list=6%,<br>signal=19%  |
| KEGG_REGULATION_OF_AUTOPHAGY                     | 33  | 0.2608  | 1.2303  | 0.2165 | 0.3247 | 0.1569 | 7823  | tags=27%, list=15%,<br>signal=23% |
| KEGG_COMPLEMENT_AND_COAGULATION_CASCADES         | 54  | -0.5345 | -1.2608 | 0.2201 | 0.3274 | 0.1582 | 2162  | tags=19%, list=4%,<br>signal=18%  |
| KEGG_HISTIDINE_METABOLISM                        | 21  | -0.6134 | -1.2607 | 0.2318 | 0.3389 | 0.1637 | 5390  | tags=33%, list=10%,<br>signal=30% |
| KEGG_MATURITY_ONSET_DIABETES_OF_THE_YOUNG        | 21  | -0.6131 | -1.2603 | 0.2323 | 0.3389 | 0.1637 | 1696  | tags=14%, list=3%,<br>signal=14%  |
| KEGG_BIOSYNTHESIS_OF_UNSATURATED_FATTY_ACIDS     | 19  | -0.6214 | -1.2630 | 0.2333 | 0.3389 | 0.1637 | 1908  | tags=21%, list=4%,<br>signal=20%  |
| KEGG_GLYCOSPHINGOLIPID_BIOSYNTHESIS_LACTO_AND_NE | 24  | -0.5967 | -1.2519 | 0.2434 | 0.3502 | 0.1692 | 1275  | tags=12%, list=2%,<br>signal=12%  |
| KEGG_ASCORBATE_AND_ALDARATE_METABOLISM           | 22  | 0.2925  | 1.2009  | 0.2450 | 0.3502 | 0.1692 | 27494 | tags=77%, list=52%,<br>signal=37% |
| KEGG_TGF_BETA_SIGNALING_PATHWAY                  | 69  | -0.5028 | -1.2110 | 0.2605 | 0.3659 | 0.1768 | 4527  | tags=19%, list=9%,<br>signal=17%  |
| KEGG_ECM_RECEPTOR_INTERACTION                    | 51  | -0.5211 | -1.2222 | 0.2611 | 0.3659 | 0.1768 | 4818  | tags=33%, list=9%,<br>signal=30%  |
| KEGG_ANTIGEN_PROCESSING_AND_PRESENTATION         | 73  | -0.4990 | -1.2060 | 0.2619 | 0.3659 | 0.1768 | 3429  | tags=10%, list=6%,<br>signal=9%   |
| KEGG_DILATED_CARDIOMYOPATHY                      | 76  | -0.4935 | -1.1970 | 0.2775 | 0.3837 | 0.1854 | 3111  | tags=17%, list=6%,<br>signal=16%  |

|                                                  |     |         |         |        |        |        |       |                                   |
|--------------------------------------------------|-----|---------|---------|--------|--------|--------|-------|-----------------------------------|
| KEGG_GLYCOPHINGOLIPID_BIOSYNTHESIS_GANGLIO_SERIE | 13  | -0.6618 | -1.2781 | 0.2789 | 0.3837 | 0.1854 | 3171  | tags=31%, list=6%,<br>signal=29%  |
| KEGG_SELENOAMINO_ACID_METABOLISM                 | 23  | 0.2748  | 1.1498  | 0.2918 | 0.3985 | 0.1926 | 8439  | tags=26%, list=16%,<br>signal=22% |
| KEGG_PATHWAYS_IN_CANCER                          | 278 | 0.3070  | 2.2755  | 0.3333 | 0.4519 | 0.2183 | 8282  | tags=45%, list=16%,<br>signal=38% |
| KEGG_PEROXISOME                                  | 73  | -0.4653 | -1.1246 | 0.3672 | 0.4941 | 0.2387 | 3037  | tags=14%, list=6%,<br>signal=13%  |
| KEGG_ABC_TRANSPORTERS                            | 36  | -0.5038 | -1.1237 | 0.3798 | 0.5073 | 0.2451 | 2016  | tags=11%, list=4%,<br>signal=11%  |
| KEGG_NITROGEN_METABOLISM                         | 21  | 0.2587  | 1.0465  | 0.3965 | 0.5255 | 0.2539 | 7765  | tags=29%, list=15%,<br>signal=24% |
| KEGG_CARDIAC_MUSCLE_CONTRACTION                  | 73  | -0.4558 | -1.1016 | 0.3992 | 0.5255 | 0.2539 | 2330  | tags=8%, list=4%,<br>signal=8%    |
| KEGG_RIBOSOME                                    | 87  | -0.4426 | -1.0785 | 0.4240 | 0.5490 | 0.2653 | 12152 | tags=87%, list=23%,<br>signal=67% |
| KEGG_NICOTINATE_AND_NICOTINAMIDE_METABOLISM      | 20  | -0.5450 | -1.1154 | 0.4257 | 0.5490 | 0.2653 | 1825  | tags=25%, list=3%,<br>signal=24%  |
| KEGG_RENIN_ANGIOTENSIN_SYSTEM                    | 15  | -0.5885 | -1.1553 | 0.4260 | 0.5490 | 0.2653 | 1836  | tags=13%, list=3%,<br>signal=13%  |
| KEGG_BASAL_CELL_CARCINOMA                        | 42  | -0.4736 | -1.0805 | 0.4336 | 0.5549 | 0.2681 | 2548  | tags=14%, list=5%,<br>signal=14%  |
| KEGG_STARCH_AND_SUCROSE_METABOLISM               | 46  | -0.4493 | -1.0398 | 0.4787 | 0.6083 | 0.2939 | 1133  | tags=9%, list=2%,<br>signal=9%    |
| KEGG_HEDGEHOG_SIGNALING_PATHWAY                  | 44  | -0.4483 | -1.0322 | 0.4866 | 0.6101 | 0.2948 | 2548  | tags=14%, list=5%,<br>signal=13%  |
| KEGG_ALDOSTERONE_REGULATED_SODIUM_REABSORPTION   | 34  | -0.4573 | -1.0119 | 0.4867 | 0.6101 | 0.2948 | 2411  | tags=12%, list=5%,<br>signal=11%  |
| KEGG_ALANINE_ASPARTATE_AND_Glutamate_METABOLIS   | 28  | -0.4763 | -1.0227 | 0.4929 | 0.6136 | 0.2965 | 3656  | tags=18%, list=7%,<br>signal=17%  |
| KEGG_LEISHMANIA_INFECTION                        | 61  | -0.4254 | -1.0145 | 0.5001 | 0.6184 | 0.2988 | 3111  | tags=20%, list=6%,<br>signal=19%  |
| KEGG_GLYCOLYSIS_GLUONEOGENESIS                   | 56  | -0.4296 | -1.0167 | 0.5059 | 0.6213 | 0.3002 | 1609  | tags=9%, list=3%,<br>signal=9%    |
| KEGG_DRUG_METABOLISM_CYTOCHROME_P450             | 63  | -0.4215 | -1.0068 | 0.5106 | 0.6229 | 0.3010 | 1496  | tags=10%, list=3%,<br>signal=9%   |
| KEGG_JAK_STAT_SIGNALING_PATHWAY                  | 142 | -0.4076 | -1.0046 | 0.5278 | 0.6397 | 0.3091 | 4470  | tags=12%, list=8%,<br>signal=11%  |

|                                                |     |         |         |        |        |        |       |                                   |
|------------------------------------------------|-----|---------|---------|--------|--------|--------|-------|-----------------------------------|
| KEGG_BETA_ALANINE_METABOLISM                   | 18  | -0.4960 | -1.0007 | 0.5873 | 0.7071 | 0.3417 | 3421  | tags=17%, list=6%,<br>signal=16%  |
| KEGG_STEROID_HORMONE_BIOSYNTHESIS              | 45  | -0.3999 | -0.9235 | 0.5951 | 0.7100 | 0.3431 | 1530  | tags=11%, list=3%,<br>signal=11%  |
| KEGG_AXON_GUIDANCE                             | 105 | -0.3870 | -0.9507 | 0.5975 | 0.7100 | 0.3431 | 3830  | tags=11%, list=7%,<br>signal=11%  |
| KEGG_O_GLYCAN_BIOSYNTHESIS                     | 23  | -0.4569 | -0.9509 | 0.6206 | 0.7301 | 0.3528 | 3854  | tags=22%, list=7%,<br>signal=20%  |
| KEGG_TYPE_II_DIABETES_MELLITUS                 | 43  | -0.3891 | -0.8935 | 0.6224 | 0.7301 | 0.3528 | 3610  | tags=16%, list=7%,<br>signal=15%  |
| KEGG_MELANOMA                                  | 63  | -0.3801 | -0.9079 | 0.6330 | 0.7379 | 0.3565 | 2497  | tags=8%, list=5%,<br>signal=8%    |
| KEGG_PENTOSE_PHOSPHATE_PATHWAY                 | 26  | -0.4349 | -0.9243 | 0.6382 | 0.7392 | 0.3571 | 2498  | tags=15%, list=5%,<br>signal=15%  |
| KEGG_PPAR_SIGNALING_PATHWAY                    | 60  | -0.3734 | -0.8886 | 0.6499 | 0.7480 | 0.3614 | 4131  | tags=18%, list=8%,<br>signal=17%  |
| KEGG_NOTCH_SIGNALING_PATHWAY                   | 42  | -0.3733 | -0.8517 | 0.6680 | 0.7635 | 0.3689 | 1502  | tags=7%, list=3%,<br>signal=7%    |
| KEGG_RETINOL_METABOLISM                        | 59  | -0.3626 | -0.8616 | 0.6717 | 0.7635 | 0.3689 | 2757  | tags=5%, list=5%,<br>signal=5%    |
| KEGG_LONG_TERM_DEPRESSION                      | 64  | -0.3507 | -0.8388 | 0.6998 | 0.7905 | 0.3819 | 2104  | tags=9%, list=4%,<br>signal=9%    |
| KEGG_FC_EPSILON_RI_SIGNALING_PATHWAY           | 76  | -0.3399 | -0.8245 | 0.7231 | 0.8118 | 0.3922 | 5099  | tags=14%, list=10%,<br>signal=13% |
| KEGG_GLYCOSAMINOGLYCAN_BIOSYNTHESIS_KERATAN_SU | 14  | -0.3374 | -0.6576 | 0.7486 | 0.8354 | 0.4036 | 12479 | tags=64%, list=24%,<br>signal=49% |
| KEGG_GLYCOSAMINOGLYCAN_BIOSYNTHESIS_HEPARAN_SU | 21  | -0.3759 | -0.7726 | 0.7580 | 0.8366 | 0.4042 | 1434  | tags=24%, list=3%,<br>signal=23%  |
| KEGG_TIGHT_JUNCTION                            | 110 | -0.3301 | -0.8115 | 0.7589 | 0.8366 | 0.4042 | 3213  | tags=8%, list=6%,<br>signal=8%    |
| KEGG_LEUKOCYTE_TRANSENDOTHELIAL_MIGRATION      | 99  | -0.3192 | -0.7822 | 0.7815 | 0.8564 | 0.4138 | 5087  | tags=14%, list=10%,<br>signal=13% |
| KEGG_T_CELL_RECEPTOR_SIGNALING_PATHWAY         | 96  | -0.3137 | -0.7674 | 0.7955 | 0.8665 | 0.4187 | 5099  | tags=16%, list=10%,<br>signal=14% |
| KEGG_FRUCTOSE_AND_MANNOSE_METABOLISM           | 31  | -0.3334 | -0.7275 | 0.8071 | 0.8740 | 0.4223 | 852   | tags=13%, list=2%,<br>signal=13%  |
| KEGG_MELANOGENESIS                             | 90  | -0.2977 | -0.7272 | 0.8194 | 0.8820 | 0.4262 | 5397  | tags=18%, list=10%,<br>signal=16% |

|                                                 |     |         |         |        |        |        |      |                                   |
|-------------------------------------------------|-----|---------|---------|--------|--------|--------|------|-----------------------------------|
| KEGG_PRION_DISEASES                             | 31  | -0.3162 | -0.6899 | 0.8283 | 0.8864 | 0.4283 | 4351 | tags=13%, list=8%,<br>signal=12%  |
| KEGG_LONG_TERM_POTENTIATION                     | 64  | -0.2818 | -0.6740 | 0.8336 | 0.8869 | 0.4285 | 4315 | tags=9%, list=8%,<br>signal=9%    |
| KEGG_VASCULAR_SMOOTH_MUSCLE_CONTRACTION         | 97  | -0.2908 | -0.7122 | 0.8386 | 0.8871 | 0.4286 | 2694 | tags=7%, list=5%,<br>signal=7%    |
| KEGG_ENDOCYTOSIS                                | 157 | -0.3082 | -0.7596 | 0.8440 | 0.8877 | 0.4289 | 4586 | tags=11%, list=9%,<br>signal=10%  |
| KEGG_MTOR_SIGNALING_PATHWAY                     | 50  | -0.2762 | -0.6455 | 0.8609 | 0.9002 | 0.4350 | 2411 | tags=18%, list=5%,<br>signal=17%  |
| KEGG_FOCAL_ADHESION                             | 157 | -0.2902 | -0.7152 | 0.8783 | 0.9087 | 0.4391 | 5099 | tags=16%, list=10%,<br>signal=14% |
| KEGG_REGULATION_OF_ACTIN_CYTOSKELETON           | 183 | -0.2979 | -0.7350 | 0.8789 | 0.9087 | 0.4391 | 2791 | tags=5%, list=5%,<br>signal=5%    |
| KEGG_CHEMOKINE_SIGNALING_PATHWAY                | 167 | -0.2713 | -0.6690 | 0.9129 | 0.9385 | 0.4535 | 5424 | tags=18%, list=10%,<br>signal=16% |
| KEGG_DRUG_METABOLISM_OTHER_ENZYMES              | 47  | -0.2121 | -0.4919 | 0.9380 | 0.9589 | 0.4633 | 1496 | tags=6%, list=3%,<br>signal=6%    |
| KEGG_OLFACTORY_TRANSDUCTION                     | 368 | -0.2968 | -0.7297 | 0.9509 | 0.9627 | 0.4652 | 2713 | tags=4%, list=5%,<br>signal=3%    |
| KEGG_MAPK_SIGNALING_PATHWAY                     | 236 | -0.2611 | -0.6438 | 0.9576 | 0.9627 | 0.4652 | 3243 | tags=5%, list=6%,<br>signal=5%    |
| KEGG_METABOLISM_OF_XENOBIOTICS_BY_CYTOCHROME_P4 | 56  | -0.1844 | -0.4365 | 0.9611 | 0.9627 | 0.4652 | 1530 | tags=7%, list=3%,<br>signal=7%    |
| KEGG_PENTOSE_AND_GLUCURONATE_INTERCONVERSIONS   | 25  | -0.1591 | -0.3361 | 0.9627 | 0.9627 | 0.4652 | 3247 | tags=12%, list=6%,<br>signal=11%  |
